# Supplementary material for: Evolutionary origin and functional divergence of totipotent cell homeobox genes in eutherian mammals
Source: BMC Biol. 2016 Jun 13;14:45. doi: 10.1186/s12915-016-0267-0 (PMC4904359; doi:10.1186/s12915-016-0267-0)
Supplement: Additional file 11: Table S4. — Fragments per kilobase per million reads (FPKM) values after ectopic expression. FPKM mapped for all human gene models excluding transfected genes. Counts for each replicate sample and means are provided. (XLSX 4778 kb) [file 12915_2016_267_MOESM11_ESM.xlsx]

## Sheet: FPKM values
gene_short_name	Control_1	Control_2	Control_3	ARGFX_1	ARGFX_2	ARGFX_3	DPRX_1	DPRX_2	DPRX_3	LEUTX_1	LEUTX_2	LEUTX_3	TPRX1_1	TPRX1_2	TPRX1_3			Control_average	ARGFX_average	DPRX_average	LEUTX_average	TPRX1_average
A1BG	2.68915	2.80025	2.36972	2.5212	2.43953	2.23933	2.34566	3.11763	2.10763	2.92192	2.67622	2.6779	2.80663	2.56929	2.85955			2.61971	2.40002	2.52364	2.75868	2.74516
A1CF	0.0204459	0.0196345	0.00238092	0.0218239	0.00904605	0.025021	0.00197419	0.00217191	0.0192566	0.00922475	0.0011403	0.00215272	0.00858241	0.00572465	0.0185462			0.0141538	0.0186303	0.0078009	0.00417259	0.0109511
A2M	0.525384	0.369312	0.496296	0.699916	0.714206	0.670126	0.436211	0.310961	0.381321	0.612979	0.551687	0.587331	0.797086	0.610885	0.61373			0.463664	0.694749	0.376164	0.583999	0.6739
A2ML1	0.00153257	0.00254227	0.00159685	0.00239829	0.00169482	0.0021319	0	0.00145667	0.00259003	0.00100879	0.0167666	0.00175318	0.00211149	0.00402258	0.00938712			0.00189056	0.002075	0.0013489	0.00650952	0.00517373
A3GALT2	0.189498	0.13374	0.105157	0.148858	0.153942	0.17912	0.161156	0.103645	0.12743	0.131554	0.122723	0.127395	0.154802	0.143853	0.145903			0.142798	0.16064	0.130744	0.127224	0.148186
A4GALT	7.75718	7.9704	7.49069	10.2461	9.90941	8.93969	8.39896	6.89302	6.64949	11.0782	10.4378	11.65	6.84025	6.65401	5.77328			7.73942	9.6984	7.31382	11.0553	6.42251
A4GNT	0.197326	0.364669	0.197578	0.277441	0.329329	0.105042	0.172829	0.138158	0.230624	0.250907	0.230334	0.137654	0.161805	0.198187	0.179254			0.253191	0.237271	0.180537	0.206298	0.179749
AAAS	20.341	19.6027	20.7825	16.1608	17.2104	17.153	19.7804	21.8889	18.9636	20.6511	20.8768	19.9766	22.538	21.9105	23.0574			20.2421	16.8414	20.211	20.5015	22.502
AACS	14.3002	15.3329	13.9588	13.6543	14.1342	14.0826	14.9198	14.7617	12.7733	15.6399	15.4696	15.5754	14.8298	14.8911	14.8156			14.5306	13.957	14.1516	15.5616	14.8455
AADAC	0.242018	0.172411	0.257608	0.334555	0.27339	0.0244762	0.172102	0.281999	0.117695	0.0294064	0.212511	0.112249	0.123123	0.0778864	0.13408			0.224012	0.210807	0.190599	0.118055	0.111696
AADACL2	0	0	0	0	0.00227532	0	0	0	0.00115905	0	0	0	0	0.00216015	0			0	0.00075844	0.00038635	0	0.00072005
AADACL3	0	0	0	0	0	0	0	0	0	0	0	0	0	0	0			0	0	0	0	0
AADACL4	0	0	0	0	0	0	0	0.00139486	0	0	0	0	0.000866526	0	0			0	0	0.000464953	0	0.000288842
AADAT	4.80266	4.43907	4.77612	4.40921	4.05274	4.22837	3.46158	4.4832	5.57103	4.30374	5.16493	5.02962	5.36693	5.21028	5.39187			4.67262	4.23011	4.50527	4.83276	5.32303
AAED1	16.6626	17.1874	20.239	14.8456	17.7025	16.0297	17.8736	19.9145	18.476	17.3953	16.041	15.4289	15.5887	16.6496	15.3056			18.0297	16.1926	18.7547	16.2884	15.848
AAGAB	23.5223	25.6274	22.76	24.6842	22.394	23.9291	25.2105	22.2965	24.2591	24.9098	24.5522	26.6243	24.886	27.4782	25.004			23.9699	23.6691	23.922	25.3621	25.7894
AAK1	3.1032	2.96567	2.62597	3.2395	3.20958	2.71268	3.22277	1.92202	3.34941	4.01048	3.28927	3.32373	3.42885	3.55861	3.6674			2.89828	3.05392	2.8314	3.54116	3.55162
AAMDC	13.22	16.8293	14.1075	14.4319	16.2391	16.6065	14.3875	16.4201	14.0726	16.8299	16.1502	17.511	14.564	17.0146	15.4666			14.7189	15.7592	14.9601	16.8304	15.6817
AAMP	51.597	51.3726	51.5421	50.5024	51.8467	53.5071	55.772	58.2057	52.9264	53.2987	53.9661	55.274	54.9287	55.3231	54.1769			51.5039	51.9521	55.6347	54.1796	54.8096
AANAT	0.0164035	0.0331325	0.00578261	0.0603658	0.0395603	0	0.00383262	0.0035148	0.0623013	0.132178	0.0397267	0.0473353	0.0226435	0.0185581	0.0755776			0.0184395	0.0333087	0.0232162	0.07308	0.0389264
AAR2	19.371	17.4758	18.7398	18.9361	19.546	19.4879	18.5993	19.2985	18.1245	16.0329	17.4293	17.438	18.8374	18.7194	19.3971			18.5289	19.3233	18.6741	16.9667	18.9846
AARD	0.202207	0.088146	0.0972599	0.0649217	0.051672	0.0865679	0.0430106	0.104996	0.126894	0.124989	0.124215	0.0943445	0.146978	0.11485	0.208077			0.129204	0.0677205	0.0916335	0.114516	0.156635
AARS	49.2539	50.5007	48.4787	53.2016	50.994	51.4757	53.4558	43.8986	49.8463	41.0342	42.4961	41.3965	41.8199	42.4306	42.7798			49.4111	51.8904	49.0669	41.6423	42.3434
AARS2	7.33521	8.00573	6.93587	5.97017	6.34818	6.54443	7.59657	5.89117	7.56979	7.11265	7.3732	7.36845	7.5777	7.04777	7.38712			7.4256	6.28759	7.01918	7.28477	7.33753
AARSD1	18.7643	19.6493	17.4247	17.1564	18.619	18.6664	20.7547	20.2691	19.9991	20.2156	18.4465	19.0148	21.5651	22.2796	20.8625			18.6128	18.1473	20.341	19.2256	21.5691
AASDH	3.97801	4.50811	4.23613	3.91355	3.79689	2.93312	4.20921	5.17511	4.08232	4.50622	4.80832	4.31737	4.24641	3.77072	4.62433			4.24075	3.54785	4.48888	4.54397	4.21382
AASDHPPT	23.9157	23.2899	23.3298	21.6359	21.4	19.0879	22.0146	21.9894	26.2424	25.6222	25.3576	27.2081	27.2986	29.2192	27.858			23.5118	20.7079	23.4155	26.0626	28.1253
AASS	5.61834	5.7102	5.72299	4.43748	4.81135	5.10523	5.58043	4.09217	5.66225	5.90238	6.17429	5.50629	7.14708	5.96505	6.2702			5.68384	4.78469	5.11162	5.86099	6.46078
AATF	40.3982	39.5944	38.661	37.5989	38.6936	39.5017	38.8509	39.9623	39.941	40.8335	42.2603	43.9576	45.8685	46.7648	46.622			39.5512	38.5981	39.5847	42.3505	46.4184
AATK	0.0708233	0.0974236	0.0752848	0.053844	0.0804809	0.108237	0.214262	0.0993342	0.104751	0.076482	0.0553226	0.0783008	0.065426	0.06507	0.0804579			0.0811772	0.080854	0.139449	0.0700351	0.070318
ABAT	1.92399	2.03113	2.09122	1.639	1.87352	1.64859	2.02906	1.59636	2.1469	5.56928	5.10893	5.57421	2.26237	2.15858	2.51577			2.01545	1.72037	1.92411	5.41747	2.31224
ABCA1	3.65902	4.16268	3.70703	3.47041	3.7786	3.70839	3.54577	2.46644	3.57589	3.89233	4.07865	3.85226	2.98257	2.88679	2.80578			3.84291	3.65247	3.19603	3.94108	2.89171
ABCA10	0.0429799	0.0430078	0.027485	0.0526446	0.0331893	0.0406845	0.0104628	0.0160552	0.00449392	0.013889	0.0241834	0.0155784	0.0606278	0.0209695	0.0508205			0.0378242	0.0421728	0.0103373	0.0178836	0.0441393
ABCA12	0.0347216	0.0200258	0.0619268	0.00844753	0.0257572	0.00865698	0.0052572	0.0186217	0.0282298	0.0269157	0.0109449	0.00556627	0.0124384	0.0118319	0.0251023			0.0388914	0.0142872	0.0173696	0.0144756	0.0164575
ABCA13	0.0149593	0.017331	0.0108283	0.0122479	0.0112808	0.0126833	0.0188522	0.015535	0.0272575	0.0167319	0.0147246	0.0134415	0.0154882	0.0173493	0.0118563			0.0143729	0.0120707	0.0205482	0.014966	0.0148979
ABCA2	9.67093	9.91306	9.54421	9.82876	9.53702	10.1256	11.69	7.27897	9.96005	9.75245	10.3795	10.048	11.3952	9.81405	10.1154			9.7094	9.83046	9.64301	10.06	10.4415
ABCA3	0.0859364	0.0942959	0.123496	0.125303	0.128682	0.121726	0.138242	0.136138	0.136013	0.14287	0.141881	0.168469	0.158252	0.12194	0.184212			0.101243	0.125237	0.136798	0.151073	0.154801
ABCA4	0.108569	0.0565489	0.0527971	0.0577856	0.0719483	0.067667	0.0753138	0.0514876	0.0450584	0.0530617	0.0623613	0.0707879	0.0539627	0.062359	0.0728335			0.0726383	0.0658003	0.0572866	0.0620703	0.0630517
ABCA5	0.520218	0.606586	0.645168	0.710833	0.621415	0.618926	0.409856	0.474843	0.475079	0.320019	0.450233	0.406302	1.25524	1.28108	1.22811			0.590657	0.650391	0.453259	0.392185	1.25481
ABCA6	0.982615	0.919774	0.74994	0.713435	0.890077	0.602629	1.11808	0.674777	1.03625	1.08483	1.12308	0.898375	0.785635	0.698602	0.746782			0.88411	0.73538	0.943036	1.03543	0.743673
ABCA7	0.542625	0.487663	0.598972	0.603755	0.692151	0.588065	0.807912	0.521919	0.621892	0.687354	0.698792	0.666273	0.898284	0.99052	0.797894			0.543087	0.62799	0.650574	0.68414	0.895566
ABCA8	0.269911	0.244181	0.254068	0.175462	0.202395	0.24275	0.299659	0.133125	0.310955	0.394684	0.455355	0.381183	0.319739	0.263339	0.342452			0.256053	0.206869	0.247913	0.410407	0.30851
ABCA9	0.181982	0.187667	0.0958308	0.224887	0.202166	0.208276	0.16953	0.131803	0.170949	0.112761	0.175297	0.0924972	0.154461	0.134637	0.0825836			0.15516	0.211776	0.157427	0.126852	0.123894
ABCB1	0.108413	0.0946183	0.0340745	0.148449	0.079811	0.0659133	0.140319	0.117633	0.152647	0.0381327	0.0539637	0.0728758	0.127845	0.0973691	0.104482			0.0790353	0.0980578	0.136866	0.0549907	0.109899
ABCB10	11.1422	10.7719	9.97397	9.29766	9.71625	9.37968	9.59191	9.73364	10.7551	11.0857	11.1909	11.2275	11.2604	11.1539	10.544			10.6294	9.46453	10.0269	11.168	10.9861
ABCB11	0	0	0.000228927	0	0	0	0	0	0	0	0	0	0	0	0			7.6309e-05	0	0	0	0
ABCB4	0.0944722	0.0733136	0.0990542	0.0740876	0.064895	0.0570576	0.0809698	0.0901741	0.0910794	0.112046	0.0471215	0.0762902	0.129419	0.121521	0.0589266			0.0889467	0.0653467	0.0874078	0.0784859	0.103289
ABCB5	0.000189034	0.000281025	7.25649e-05	0.000259055	0.000577626	0.000756869	0.000878462	3.67748e-05	0.000326938	9.82326e-05	0.000328228	0.000307964	0.000408937	0.000371686	0.000289591			0.000180875	0.000531183	0.000414058	0.000244808	0.000356738
ABCB6	4.83843	4.52481	4.33466	3.79214	3.92126	3.58967	4.91324	4.56737	4.83113	4.52482	5.24094	5.12217	5.21655	4.59875	5.36771			4.56597	3.76769	4.77058	4.96264	5.061
ABCB7	7.06185	7.57219	7.04212	6.75902	6.85557	6.76802	7.34627	7.4375	7.76293	7.28981	7.575	7.22924	8.15687	7.78365	8.17579			7.22539	6.7942	7.51557	7.36468	8.03877
ABCB8	10.8594	12.1726	11.5549	10.4201	11.2105	11.3425	11.861	12.2193	10.8417	11.6733	12.2941	11.6463	12.2724	12.3739	12.3913			11.529	10.991	11.6407	11.8712	12.3459
ABCB9	1.31023	1.75675	1.31766	1.10743	1.66697	1.46541	1.99724	1.87292	1.97232	1.61067	1.75247	1.20675	1.73543	1.64332	1.38854			1.46155	1.41327	1.94749	1.5233	1.5891
ABCC1	21.2888	20.4861	19.6231	20.6868	21.2535	21.0039	21.8158	16.3047	20.0242	25.2653	23.927	25.8958	20.9244	20.7041	21.1283			20.466	20.9814	19.3816	25.0294	20.9189
ABCC10	7.71419	9.17233	8.22667	7.37169	7.70274	7.72504	9.72702	7.84988	8.06943	7.23656	6.87506	8.32842	8.06987	7.86485	8.59336			8.37106	7.59982	8.54878	7.48001	8.17603
ABCC11	0.0220103	0.0149142	0.0246813	0.0438541	0.0392619	0.00150724	0.0286167	0.0150206	0.0124581	0.00968699	0.0119156	0.00116657	0.0218054	0.0292444	0.0149031			0.0205353	0.0282077	0.0186985	0.00758972	0.0219843
ABCC12	0	0.00787192	0.000805543	0.00517346	0.0210508	0.0353064	0.00685283	0.00628504	0.000871042	0.00803215	0.0337747	0.0162881	0.00529969	0	0.0003977			0.00289249	0.0205102	0.00466964	0.019365	0.00189913
ABCC2	0.51191	0.569212	0.396307	1.02948	0.662543	0.636714	0.339141	0.337824	0.365847	0.194277	0.261256	0.267021	0.377402	0.330772	0.359741			0.492476	0.776246	0.347604	0.240851	0.355972
ABCC3	19.5914	20.5054	16.6694	27.2518	24.6663	25.0299	20.6784	17.0128	18.8275	25.8325	25.011	26.9335	19.2583	21.571	19.692			18.9221	25.6493	18.8396	25.9257	20.1738
ABCC4	9.29243	8.50873	8.86243	8.14539	8.13158	7.87439	8.54789	8.01237	9.37469	10.8227	9.8906	10.5939	10.7646	11.1661	10.2388			8.88786	8.05045	8.64498	10.4357	10.7232
ABCC5	6.67807	6.68003	7.77131	6.59046	6.24326	6.10361	7.37326	6.87276	7.34516	9.87233	9.67503	9.65725	9.04156	8.82134	8.52717			7.04314	6.31244	7.19706	9.73487	8.79669
ABCC6	0.0632254	0.15919	0.213734	0.275604	0.306101	0.162894	0.019052	0.0659237	0.00374757	0.173784	0.239152	0.360657	0.201742	0.087425	0.173214			0.145383	0.2482	0.0295744	0.257864	0.154127
ABCC8	0.0115723	0.010657	0.0119266	0.0134726	0.013632	0.010343	0.0153499	0.0126463	0.0106643	0.0127506	0.0146462	0.0113759	0.00966631	0.0126339	0.0157019			0.0113853	0.0124825	0.0128868	0.0129242	0.0126674
ABCC9	1.08875	1.11486	1.17295	0.977083	0.758114	0.908842	1.071	0.728607	0.85497	0.614863	0.47918	0.424055	0.709413	0.780146	0.768869			1.12552	0.881346	0.884859	0.506033	0.752809
ABCD1	6.721	6.87693	6.44079	7.13594	7.05607	6.94366	8.20338	6.34436	6.65044	5.30953	6.19188	6.31847	6.46505	6.0939	6.50227			6.67957	7.04522	7.06606	5.93996	6.35374
ABCD2	0.00547062	0.0275748	0.000508347	0.00088467	0.0137785	0.0169498	0.000168602	0.0157905	0.00027484	0.0135302	0.019111	0.0134147	0.00980678	0.013533	0.0049248			0.0111846	0.0105377	0.00541131	0.015352	0.00942153
ABCD3	13.6321	11.6319	14.023	11.2777	12.1188	9.72015	13.6033	13.0033	13.8083	18.1198	17.1563	17.5071	18.9555	16.9514	17.4466			13.0957	11.0389	13.4716	17.5944	17.7845
ABCD4	5.36706	4.59609	3.87446	5.31168	4.69345	4.37622	5.40851	4.87553	5.15282	4.98156	4.50419	5.03283	4.30305	4.8594	4.74421			4.61254	4.79378	5.14562	4.83953	4.63555
ABCE1	53.5728	49.0235	55.9596	43.4335	45.2253	39.5274	47.9845	46.8811	54.7637	62.4213	57.2056	58.2254	61.0346	60.5967	59.7751			52.852	42.7287	49.8764	59.2841	60.4688
ABCF1	38.252	38.9049	37.1633	38.7834	39.4371	40.184	37.2847	35.0395	37.2347	34.4699	34.1234	34.5482	36.7885	37.7819	37.1411			38.1067	39.4682	36.5196	34.3805	37.2372
ABCF2	52.4859	53.8182	52.8648	47.9896	49.6711	50.7891	55.6456	49.3449	53.4624	56.0344	54.6193	56.3297	56.0763	56.1982	59.4536			53.0563	49.4833	52.8176	55.6611	57.2427
ABCF3	21.8671	21.364	20.9231	20.1511	21.3642	19.9923	23.5522	25.382	23.939	23.7038	23.3211	23.785	23.5485	23.9072	23.9841			21.3847	20.5025	24.2911	23.6033	23.8133
ABCG1	0.0103339	0	0.029781	0.0148851	0	0.0202157	0.0444891	0.0229426	0.0306273	0.0163644	0.000313052	0	0.000185209	0.00257544	0.00930059			0.0133716	0.0117003	0.0326863	0.00555915	0.00402041
ABCG2	0.129331	0.150613	0.087281	0.241216	0.149023	0.272559	0.112251	0.19496	0.272868	0.351999	0.159563	0.19584	0.225643	0.239074	0.243974			0.122408	0.220933	0.19336	0.235801	0.23623
ABCG4	0.0390758	0.0823905	0.0451031	0.0150529	0.0398927	0.0664794	0.0723889	0.089957	0.0384295	0.0489832	0.0586204	0.0958138	0.0835336	0.143876	0.0890744			0.0555231	0.040475	0.0669251	0.0678058	0.105495
ABCG5	0.0114487	0.00404695	0.010966	0.00147724	0.00467865	0.00399449	2.68213e-50	0.00139741	0.0014868	0.00114364	5.23968e-71	2.10596e-27	0.000246522	0.0059423	0.0024781			0.00882055	0.00338346	0.000961403	0.000381213	0.00288897
ABCG8	0.00676621	0.0156679	1.21556e-12	0.00288634	0.022116	0.0006701	0.000665884	0.0223602	0.00874225	0.000543569	0.00782839	0.00452351	0.0163317	0.00617544	0.0467618			0.00747804	0.00855748	0.0105894	0.00429849	0.0230896
ABHD1	0.0375833	0.0117083	0.0147592	0.024582	0.0460039	0.0279478	0.0440327	0.0262976	0.0159322	0.0445712	0.0272891	0.0855905	0.0194858	0.0616661	0.0109348			0.0213503	0.0328446	0.0287542	0.0524836	0.0306956
ABHD10	13.0601	15.0296	13.6872	10.551	12.2384	10.0551	15.2695	14.762	16.1164	16.1342	16.6956	15.7973	17.4345	17.5212	18.3221			13.9256	10.9482	15.3826	16.209	17.7593
ABHD11	9.95168	9.30922	8.57412	9.06803	9.22046	8.72574	11.4213	11.3068	8.90074	8.54321	8.46461	10.0352	10.5958	10.6439	12.6063			9.27834	9.00474	10.5429	9.01434	11.282
ABHD12	25.0453	25.3213	26.9984	22.7756	24.5096	24.2293	27.8487	27.4401	26.8244	25.6566	25.0618	28.9606	28.3478	27.7223	28.7168			25.7883	23.8382	27.3711	26.5597	28.2623
ABHD12B	0.0657109	0.0897756	0.16122	0.0801247	0.0644819	0.0533383	0.0526908	0.0487108	0.0867302	0.0440729	0.0261599	0.0413431	0.106769	0.162368	0.158834			0.105569	0.0659816	0.0627106	0.037192	0.142657
ABHD13	8.96104	10.9916	10.5272	9.92495	8.8049	9.01636	9.62358	9.78337	10.2491	8.82501	8.63417	10.2503	9.80268	11.4934	10.2551			10.1599	9.24874	9.88535	9.23649	10.5171
ABHD14A	7.46259	6.06311	6.59749	5.71251	5.65597	5.67416	6.67028	7.41835	6.26125	6.67371	6.91617	7.28114	6.90132	7.32183	7.14768			6.70773	5.68088	6.78329	6.95701	7.12361
ABHD14B	21.6004	23.8929	25.8143	22.0522	23.298	24.9499	22.2147	25.5802	22.4379	23.3282	23.5373	23.2542	22.947	20.6267	22.3866			23.7692	23.4334	23.4109	23.3732	21.9868
ABHD15	2.93565	2.989	3.06675	2.31051	2.42811	2.60905	2.84698	3.27873	3.03748	3.20896	3.21212	3.24073	3.12576	2.86316	2.72493			2.99713	2.44922	3.0544	3.2206	2.90462
ABHD16A	8.53717	9.13854	8.43184	8.976	8.56058	8.77407	9.18411	10.014	9.75744	6.86198	6.83798	7.59096	8.29547	8.32049	8.62234			8.70252	8.77022	9.65185	7.09697	8.41277
ABHD16B	1.19885	1.74876	1.07667	1.30671	1.43707	1.72057	1.21197	1.11124	1.27006	0.971678	1.22923	1.34854	1.51613	1.29858	1.59468			1.34143	1.48812	1.19776	1.18315	1.4698
ABHD17A	28.8742	27.3364	25.0948	27.8972	29.0813	25.8347	32.355	30.6454	26.6258	23.9458	25.7316	25.6693	29.6693	25.3687	25.385			27.1018	27.6044	29.8754	25.1156	26.8077
ABHD17B	6.91221	5.88277	6.94032	6.23487	5.74583	6.09343	6.70105	4.99722	6.67918	6.5269	6.67958	6.5769	8.85081	7.68086	7.58106			6.57843	6.02471	6.12582	6.59446	8.03758
ABHD17C	7.76181	7.53549	7.49225	8.14462	8.58334	7.52615	6.78491	9.02594	7.79324	8.7964	9.58492	8.66424	11.1522	9.98214	9.87698			7.59652	8.0847	7.86803	9.01519	10.3371
ABHD2	11.5766	10.9211	11.3525	14.5153	13.4761	13.4891	11.9985	8.77616	12.0439	12.1078	11.1805	11.7188	11.1775	11.1916	10.7219			11.2834	13.8268	10.9395	11.669	11.0303
ABHD3	3.67427	3.833	5.51744	3.87987	3.46269	3.44825	3.97996	4.55464	4.02127	4.04831	4.32602	3.84916	4.64503	4.34901	4.4898			4.34157	3.59694	4.18529	4.0745	4.49461
ABHD4	9.76752	10.5557	10.6766	11.2369	10.5656	10.827	10.6307	10.4736	9.63697	9.85368	10.2409	11.643	8.82154	8.47196	9.00788			10.3333	10.8765	10.2471	10.5792	8.76713
ABHD5	22.9665	24.0099	20.8356	26.2655	23.6248	19.4438	21.7238	23.3912	21.6456	19.9749	18.382	21.0737	22.8988	26.253	24.6737			22.604	23.1114	22.2535	19.8102	24.6085
ABHD6	3.86604	3.64441	3.39866	3.97891	3.66861	3.32839	3.53725	3.97217	4.51791	3.07928	2.9374	3.2837	3.82354	4.34264	4.0349			3.63637	3.65864	4.00911	3.10013	4.06703
ABHD8	1.48721	1.63811	1.38116	2.11742	1.98923	1.9846	1.94333	1.66097	1.59823	1.52435	1.65766	1.49679	1.81523	1.74264	2.07818			1.50216	2.03042	1.73418	1.5596	1.87868
ABI1	26.1985	27.3194	25.5138	26.2139	24.6508	26.5104	25.3306	25.4569	28.3347	24.9311	22.3722	23.6276	24.7134	24.2717	26.4426			26.3439	25.7917	26.3741	23.6436	25.1426
ABI2	15.3063	15.4003	16.9931	13.268	13.6848	14.0218	14.9466	14.9674	16.6895	19.2828	18.6424	18.0607	17.6855	18.1419	16.7516			15.8999	13.6582	15.5345	18.662	17.5263
ABI3	0.111025	0.116524	0.130615	0.0559879	0.170715	0.0794799	0.230408	0.0689484	0.127079	0.351947	0.0744874	0.271568	0.195136	0.0702766	0.0542147			0.119388	0.102061	0.142145	0.232667	0.106542
ABI3BP	23.1877	23.3836	21.7706	19.4733	19.0619	18.9057	20.2158	15.3176	20.5838	20.3507	19.7314	20.0624	20.3542	18.7859	18.9189			22.7806	19.147	18.7057	20.0482	19.353
ABL1	28.1928	28.9116	27.123	32.406	30.9099	30.386	27.2738	21.6768	27.3088	26.9785	27.604	28.2742	28.7898	27.5463	27.3825			28.0758	31.234	25.4198	27.6189	27.9062
ABL2	26.8644	25.6019	25.1735	31.6605	26.8258	26.1803	21.5755	14.82	21.4345	19.1075	17.5998	17.2521	18.9132	18.8693	17.0993			25.8799	28.2222	19.2767	17.9865	18.2939
ABLIM1	0.109757	0.189135	0.0537903	0.677812	0.504695	0.354555	0.157755	0.096412	0.218633	0.25013	0.277774	0.303647	0.261161	0.280508	0.296718			0.117561	0.512354	0.1576	0.277184	0.279462
ABLIM2	0.187732	0.198037	0.411499	0.628807	0.568109	0.35961	0.646136	0.506745	0.494202	0.177881	0.301361	0.190499	0.25797	0.288949	0.134317			0.265756	0.518842	0.549028	0.223247	0.227079
ABLIM3	138.678	138.181	129.661	115.903	115.947	117.197	147.596	119.978	138.356	106.531	106.51	103.061	118.12	117.999	118.157			135.507	116.349	135.31	105.367	118.092
ABO	0	0	0	0	0.00137066	0.00172415	0	0	0	0	0	0	0	0	0			0	0.0010316	0	0	0
ABR	17.607	17.2448	17.5427	19.3214	18.4256	18.0472	18.556	16.7838	17.4312	16.4888	16.0637	16.3962	17.0104	16.808	16.2192			17.4648	18.5981	17.5903	16.3162	16.6792
ABRA	0.0665003	0.0284082	0.0603395	0.0121472	0.0572812	0.00647878	0.00321901	0.00885364	0	0.0292717	0.00309885	0	0.0228273	0.0272636	0.00992534			0.0517493	0.0253024	0.00402422	0.0107902	0.0200054
ABRACL	50.4467	53.7781	64.4067	59.1842	56.0586	43.2054	47.558	68.2932	51.7443	42.5257	37.1529	49.7575	73.3441	64.1725	52.6827			56.2105	52.8161	55.8652	43.1454	63.3998
ABT1	12.8725	13.075	12.2275	13.0912	14.1155	13.7581	14.2373	14.2946	14.5634	13.1484	12.3066	14.1905	16.2374	15.5552	16.1485			12.725	13.6549	14.3651	13.2152	15.9804
ABTB1	3.53378	4.47082	3.45181	6.00206	4.92089	4.97654	4.53425	4.51495	4.39806	3.32987	3.85129	3.76005	4.00182	3.68423	4.22056			3.8188	5.29983	4.48242	3.64707	3.96887
ABTB2	1.03209	1.43073	0.767735	1.72449	1.43536	1.44822	1.09301	0.84017	0.920193	1.21844	1.03628	1.54579	0.770244	0.712828	0.879543			1.07685	1.53602	0.951124	1.26684	0.787538
ACAA1	33.1533	38.1124	34.7987	32.437	36.9142	38.7315	41.9563	41.2219	35.1906	38.3291	37.4974	37.0304	34.1982	37.5675	38.6056			35.3548	36.0276	39.4563	37.619	36.7904
ACAA2	23.0694	22.7506	25.5403	24.3807	26.0363	25.9054	23.2022	25.3565	23.9585	24.8197	25.1687	24.226	24.3825	26.3255	26.407			23.7868	25.4408	24.1724	24.7381	25.705
ACACA	11.9705	10.774	11.9612	8.27983	9.49472	9.18391	11.4349	8.53336	11.9033	12.7133	12.7574	12.8185	13.3048	12.4985	12.1313			11.5686	8.98615	10.6239	12.7631	12.6449
ACACB	0.221391	0.334732	0.253695	0.242538	0.163611	0.226478	0.329296	0.169858	0.298114	0.448656	0.346051	0.383799	0.329008	0.330453	0.405212			0.269939	0.210876	0.265756	0.392835	0.354891
ACAD10	6.05911	5.89128	5.96797	5.11062	5.04684	5.40363	5.58765	5.08448	5.34192	5.45346	5.38274	5.55417	6.02019	5.83338	5.8925			5.97279	5.18703	5.33802	5.46346	5.91536
ACAD11	8.84583	8.90523	8.03298	6.85684	6.65348	6.29509	7.61288	7.71682	8.57127	8.54941	8.15355	8.55435	8.96129	8.45633	8.46395			8.59468	6.6018	7.96699	8.4191	8.62719
ACAD8	7.64046	7.28599	7.83915	6.6158	6.5841	6.07602	7.31154	7.38657	6.75034	7.06214	7.00233	7.33284	8.06276	7.55418	8.15072			7.58853	6.42531	7.14948	7.13244	7.92255
ACAD9	20.1861	20.0119	20.1941	17.4055	17.7232	18.8045	20.1195	20.0484	19.4098	20.3416	19.0179	18.8882	20.1355	21.313	20.7947			20.1307	17.9777	19.8592	19.4159	20.7477
ACADL	0	0.0266246	0	0	0.0118907	0.0333858	0	0	0	0	0	0.0268539	0.0787021	0.102817	0.175437			0.00887487	0.0150922	0	0.0089513	0.118985
ACADM	20.21	22.0536	21.0028	17.9395	18.0411	19.8746	17.1543	22.2837	19.8998	23.5001	21.7846	22.0768	19.8868	19.6022	20.716			21.0888	18.6184	19.7793	22.4538	20.0683
ACADS	3.76544	4.58056	4.25107	3.94988	4.34076	4.40451	4.38127	4.72157	4.2952	3.41096	3.55027	3.46555	3.76044	3.63494	4.07235			4.19902	4.23172	4.46601	3.47559	3.82258
ACADSB	4.99925	5.19428	5.4846	4.20164	4.77881	4.30169	5.39053	4.19528	5.51812	7.28397	7.01113	6.40691	7.42611	7.24721	6.15707			5.22604	4.42738	5.03464	6.90067	6.94346
ACADVL	110.376	110.924	109.073	133.568	125.277	123.934	116.588	119.184	112.536	115.434	110.695	118.19	114.735	120.143	120.75			110.124	127.593	116.103	114.773	118.543
ACAN	0.00561485	0.000379112	0	0.00322497	0.0162968	0.00964046	0.103106	0.0552543	0.0797335	0	0.00460665	0.00373159	0.0109174	0.0116856	0.00303049			0.00199799	0.00972074	0.0793646	0.00277941	0.0085445
ACAP1	0.093559	0.223683	0.0843337	0.197385	0.172746	0.173097	0.144594	0.194987	0.12935	0.15227	0.182313	0.168143	0.132502	0.14357	0.158135			0.133859	0.181076	0.15631	0.167575	0.144736
ACAP2	9.35847	9.03868	10.1164	9.11985	8.66057	8.11369	8.75647	7.46147	11.6114	11.5609	10.2784	10.9508	10.0259	10.2746	9.09223			9.50452	8.63137	9.27645	10.93	9.79758
ACAP3	8.59555	9.46657	7.48821	7.56507	7.69312	7.08182	9.58983	7.39611	8.49364	6.95736	7.57898	7.02894	9.5931	8.55423	8.13112			8.51678	7.44667	8.49319	7.18843	8.75948
ACAT1	47.0888	47.9018	47.8799	42.6842	45.0341	49.4696	46.9976	57.4323	51.7433	48.7946	49.7061	51.6572	47.4492	51.3946	48.3261			47.6235	45.7293	52.0577	50.0526	49.0566
ACAT2	25.8272	22.0887	27.9927	20.0223	23.3467	23.4643	22.599	29.2299	23.6247	23.5911	24.0738	22.1528	27.4709	25.5326	25.648			25.3029	22.2778	25.1512	23.2726	26.2172
ACBD3	24.6738	22.7575	21.9852	23.6325	23.308	22.0853	23.4113	19.509	23.0333	25.1796	22.637	23.299	23.2578	22.6778	22.8748			23.1388	23.0086	21.9845	23.7052	22.9368
ACBD4	2.43341	3.23818	1.90879	1.79554	2.64391	2.3492	3.05186	2.77196	2.38559	2.85747	3.06065	2.77329	2.12606	2.02582	2.19001			2.52679	2.26288	2.73647	2.89714	2.11396
ACBD5	8.16439	7.29293	7.66081	7.82022	8.09472	8.62372	8.29067	6.43448	8.31734	9.00795	9.35377	8.83843	8.00617	9.01939	8.64255			7.70604	8.17955	7.68083	9.06672	8.55604
ACBD6	27.9762	28.6189	29.8538	27.2543	22.3107	30.0237	25.2553	32.6787	30.0262	29.4702	30.1235	27.3781	31.271	32.1917	30.622			28.8163	26.5296	29.3201	28.9906	31.3616
ACBD7	0.115372	0.277957	0.114086	0.122029	0.0687326	0.0431239	0.139611	0.108309	0.105038	0.0788858	0.165387	0.0585246	0.34877	0.171291	0.191808			0.169138	0.0779618	0.117653	0.100932	0.23729
ACCS	1.22823	1.45838	1.49677	1.25661	1.15389	1.04674	0.932191	1.45776	1.41006	1.03012	1.61597	1.2583	1.56014	1.55468	1.06781			1.39446	1.15241	1.26667	1.30146	1.39421
ACCSL	0.00322885	0.00253867	0.00257572	0.00257935	0.00273421	0.00122823	0.00366166	0.00156648	0.00238772	0.000796906	0.00117505	0.00114068	0.00166844	0.00296638	0.00236193			0.00278108	0.0021806	0.00253862	0.00103755	0.00233225
ACD	8.2501	8.56903	8.56553	7.40114	9.163	8.81243	9.608	10.8792	9.0621	10.3224	9.58554	9.62468	10.8218	10.0017	11.169			8.46155	8.45886	9.84977	9.84421	10.6642
ACE	3.37543	3.06571	2.77284	2.98115	2.89366	3.04957	3.0956	3.05479	3.32152	2.19812	2.42539	2.4875	3.82105	3.34167	3.57193			3.07133	2.97479	3.1573	2.37034	3.57822
ACE2	0.0100149	0.0144662	9.9405e-09	0.0243211	0.0149897	0.00131951	0.0361654	0.016579	3.75652e-09	3.80297e-09	5.55377e-09	3.09564e-09	0.0102985	0.0390954	0.0270476			0.00816037	0.0135434	0.0175815	4.15079e-09	0.0254805
ACER1	0.124466	0.121924	0.0859796	0.0681904	0.0604374	0.0036303	0.161325	0.00132292	0.0640374	0.0985857	0.119241	0.0231135	0.0766176	0.116392	0.0582975			0.11079	0.044086	0.0755618	0.0803134	0.083769
ACER2	0.434036	0.623216	0.306268	0.444578	0.362826	0.405964	0.256131	0.330128	0.358649	0.25796	0.262023	0.341924	0.558578	0.333969	0.470448			0.454507	0.404456	0.314969	0.287302	0.454332
ACER3	7.15618	7.6423	9.02788	5.83147	6.71705	5.95934	6.57796	5.07261	7.26959	10.3202	10.5911	7.93985	7.52256	8.13889	8.654			7.94212	6.16929	6.30672	9.61705	8.10515
ACHE	0.443967	0.494127	0.384578	0.517529	0.511481	0.63208	1.31349	0.77551	1.13576	0.408893	0.580911	0.405416	0.138286	0.142475	0.202335			0.440891	0.553697	1.07492	0.465073	0.161032
ACIN1	51.1402	50.0157	45.9403	46.3265	45.2828	44.3893	48.701	44.7777	49.3905	48.4248	50.9324	47.7983	51.4801	50.8557	51.8897			49.0321	45.3329	47.6231	49.0518	51.4085
ACKR1	0.0348869	0.0301702	0.0568522	0.0649001	0.0119121	0.0379503	0	0.0386155	0	0.0720502	0.040017	0.0734329	0.0966532	0.0429641	0.0703572			0.0406364	0.0382542	0.0128718	0.0618334	0.0699915
ACKR2	0.0102478	0.0694255	0.111828	0.0372173	0.00141571	0.00207762	0.00117974	0.0226106	0.0302247	0.00192607	0.0118744	0.028224	0.0210804	0.0548654	0.0462006			0.0638338	0.0135702	0.018005	0.0140082	0.0407155
ACKR3	0.103666	0.216511	0.116017	0.960549	0.320906	0.501224	0.211964	0.140974	0.0783193	0.0649405	0.0370426	0.0449051	0.109749	0.0876766	0.141159			0.145398	0.594226	0.143752	0.0489627	0.112862
ACKR4	3.90936	4.61061	5.03401	3.42989	4.06101	3.9628	5.3779	5.10411	4.87842	2.26162	2.66595	2.24786	3.25121	3.39714	3.56693			4.51799	3.8179	5.12014	2.39181	3.40509
ACLY	97.9387	96.5721	97.0856	86.9801	93.6626	92.7372	101.185	87.0452	98.4858	108.305	102.979	101.625	104.202	100.496	102.437			97.1988	91.1266	95.572	104.303	102.378
ACMSD	0.0221131	0.019258	0.0112899	0.00847807	0.0104134	0.0150727	0.0133731	0.0147125	0.0117718	0.0165933	0.0226582	0.0254152	0.0320289	0.0219394	0.0238879			0.0175537	0.0113214	0.0132858	0.0215556	0.0259521
ACO1	13.5071	11.4621	12.8524	11.5312	11.8266	11.4121	12.832	12.5323	13.3786	23.5783	18.7303	23.0502	28.2477	23.8575	21.3108			12.6072	11.59	12.9143	21.7863	24.472
ACO2	42.4206	44.0677	41.4139	40.5537	40.5894	40.4373	44.5938	41.7813	42.3689	45.7313	43.338	43.5202	46.5209	45.8597	47.4613			42.6341	40.5268	42.9147	44.1965	46.614
ACOT1	6.28572	6.29922	7.06562	5.65124	6.57516	7.26717	6.30772	9.51706	7.45705	5.7644	5.67195	5.99588	6.30236	6.21305	6.5294			6.55019	6.49786	7.76061	5.81074	6.34827
ACOT11	0.754683	0.706841	0.619615	0.688548	0.660877	0.531933	0.972746	0.594443	0.549087	0.570836	0.650156	0.66938	0.875962	0.791493	0.861121			0.693713	0.627119	0.705425	0.630124	0.842859
ACOT12	0.0310485	0.0156478	0	0.00120263	0.0268669	0.00106905	0.00106233	0.000486968	0	0.000867189	0.0366718	0.0288365	0.0421374	0.0195299	0.0203231			0.0155654	0.00971286	0.000516433	0.0221252	0.0273301
ACOT13	25.0576	22.2775	25.1578	21.7142	17.8647	18.3077	22.7863	33.7715	24.5533	24.1456	25.2	28.3622	22.4557	26.2796	23.2574			24.1643	19.2955	27.037	25.9026	23.9976
ACOT2	8.14918	8.71044	9.85863	7.48538	7.32966	8.20715	8.84027	11.7354	9.28613	7.84977	8.27353	8.20812	8.35595	6.16702	7.58048			8.90608	7.67406	9.95393	8.11047	7.36782
ACOT4	0.132508	0.179509	0.193291	0.217675	0.17954	0.16785	0.160271	0.425589	0.104118	0.156997	0.137641	0.175085	0.182562	0.180747	0.333503			0.168436	0.188355	0.229993	0.156574	0.232271
ACOT6	0.00379284	0.0110104	0.00691584	0.0447602	0.0647243	0.00923313	0	0.00841181	0.00186954	0.0197928	0.00441628	0.00357313	0.00522555	0.0614896	0			0.00723969	0.0395725	0.00342712	0.00926074	0.0222384
ACOT7	84.552	92.2322	82.6447	84.173	86.0853	90.9408	97.3019	97.7985	91.488	85.642	82.0545	80.7721	78.3814	79.0089	82.1091			86.4763	87.0664	95.5295	82.8229	79.8331
ACOT8	10.6007	10.2924	8.60844	9.88655	11.3947	12.2527	9.83295	11.0114	10.4239	9.42128	9.14665	10.0424	11.0611	11.4048	10.0339			9.83385	11.178	10.4227	9.53678	10.8333
ACOT9	33.9628	32.5737	33.8985	30.2366	31.3623	30.8833	32.2307	33.3983	33.0189	36.4126	34.1381	37.4106	34.0322	34.4056	36.0512			33.4783	30.8274	32.8826	35.9871	34.8297
ACOX1	9.05409	9.12768	9.70505	8.5243	9.06765	8.56758	8.9717	7.11071	9.15826	11.5703	10.1936	10.5863	9.84643	9.76551	9.76701			9.29561	8.71984	8.41356	10.7834	9.79298
ACOX2	1.9591	2.18389	1.89988	1.47614	1.60411	1.73572	2.36746	2.03669	2.26144	2.69022	2.7249	2.31551	2.8477	2.46533	2.82148			2.01429	1.60532	2.22186	2.57688	2.7115
ACOX3	6.73977	6.88101	7.16912	5.4095	6.66126	6.38138	6.59764	6.57276	5.76207	6.94401	7.06686	7.20222	6.94523	7.03712	8.09283			6.92997	6.15071	6.31082	7.07103	7.35839
ACOXL	0.00732543	0.00623789	0.00627341	0.0066352	0.0430145	0.0180674	0.01796	0.0163957	0.0146078	0.00805481	0.00873701	0.0139722	0.0408771	0.0205499	0.0132508			0.00661224	0.0225724	0.0163212	0.0102547	0.0248926
ACP1	71.1177	64.9587	73.1379	63.8287	63.8068	62.872	60.8275	70.832	73.5752	69.9578	74.7933	71.9543	69.6327	68.3901	73.2963			69.7381	63.5025	68.4116	72.2351	70.4397
ACP2	11.8597	10.7024	9.98968	10.8306	10.2107	11.5821	11.8698	10.1902	11.2808	11.6007	10.5884	11.4724	10.9354	10.4556	10.1878			10.8506	10.8745	11.1136	11.2205	10.5263
ACP5	2.12318	2.08163	1.47163	3.66167	2.566	2.95905	2.06603	2.4147	1.75404	1.2674	1.34729	2.28638	1.39489	2.03628	1.69012			1.89215	3.06224	2.07826	1.63369	1.7071
ACP6	1.68858	1.67478	1.45367	1.68768	1.25696	1.57407	1.24193	1.7275	1.43851	1.98182	1.36369	1.64981	1.76313	1.944	1.42422			1.60568	1.50624	1.46931	1.66511	1.71045
ACPP	2.28371	1.65361	2.4765	1.59879	1.85671	1.62308	2.35637	2.37516	2.03666	3.40889	2.94235	3.22739	2.84891	2.53306	2.27148			2.13794	1.69286	2.25606	3.19288	2.55115
ACPT	0.225772	0.106282	0.08901	0.116973	0.10628	0.10398	0.16237	0.0338329	0.0842167	0.132544	0.206043	0.114969	0.222783	0.229829	0.175779			0.140355	0.109078	0.0934732	0.151185	0.209464
ACR	0.0552275	0.0934134	0.0477115	0.0686114	0.0696904	0.0644924	0.0049461	0.013604	0.0263784	0	0.0617126	0	0.0558339	0.0215915	0.0647999			0.0654508	0.0675981	0.0149762	0.0205709	0.0474084
ACRBP	0.405471	0.224641	0.302857	0.501902	0.326198	0.245182	0.337879	0.233866	0.11726	0.0581439	0.146436	0.103578	0.243403	0.296504	0.282233			0.31099	0.357761	0.229668	0.102719	0.274047
ACRC	0.677904	0.743736	0.452848	1.38869	0.671471	0.702808	0.643196	0.670845	0.5098	0.567893	0.401933	0.647191	0.858103	0.793599	0.503566			0.624829	0.92099	0.607947	0.539006	0.718423
ACRV1	0.16463	0.0604805	0.235684	0.0933907	0.0987199	0.221537	0.0779549	0.0916148	0.126164	0.15146	0.117975	0.113073	0.221084	0.13324	0.132544			0.153598	0.137883	0.0985779	0.127503	0.162289
ACSBG1	0.11131	0.0766471	0.10248	0.121701	0.139769	0.0405169	0.120912	0.160114	0.110834	0.153535	0.168837	0.136123	0.237541	0.132714	0.0900254			0.0968124	0.100662	0.13062	0.152832	0.153427
ACSBG2	0.0137366	0.0272984	0.0254463	0.0126728	0.00664597	0.00686711	0.00712059	0.0309712	0.0135744	0.00879967	0.0181843	0.0147896	0.0115468	0.0239738	0.013091			0.0221604	0.00872863	0.0172221	0.0139245	0.0162039
ACSF2	1.35305	1.88004	1.65796	1.47525	1.50414	2.26324	1.63292	1.86638	1.85096	1.53509	2.31887	1.88489	2.0126	2.1063	2.23501			1.63035	1.74754	1.78342	1.91295	2.11797
ACSF3	10.918	12.295	9.90338	9.46785	9.31995	11.1309	11.6811	11.6672	11.4323	10.2713	11.3787	10.0139	9.84418	10.0135	11.4425			11.0388	9.9729	11.5935	10.5546	10.4334
ACSL1	19.8448	17.9139	19.2053	17.8597	18.5414	17.8036	18.5661	20.1005	19.7482	20.1121	19.0234	20.3396	20.3381	20.7432	20.6051			18.988	18.0682	19.4716	19.825	20.5621
ACSL3	46.6368	45.4383	47.5677	39.3965	40.0446	38.8325	44.692	42.4363	47.9827	46.9896	45.795	43.4726	42.6778	40.7439	41.1404			46.5476	39.4245	45.037	45.4191	41.5207
ACSL4	32.5912	31.6786	33.9699	32.384	30.4291	28.4724	31.1265	25.0736	33.9468	37.1808	33.0071	33.5101	36.8763	37.688	35.2365			32.7466	30.4285	30.049	34.566	36.6003
ACSL5	0.6115	0.649971	0.672011	0.979059	0.759894	0.80492	0.562226	0.407708	0.520888	0.500285	0.44318	0.721139	0.396311	0.472414	0.512124			0.644494	0.847958	0.496941	0.554868	0.460283
ACSL6	0.0168916	0.00890147	0	0.026948	0.0176623	0	0	0	0.0165939	0	0	0	0.023273	0.004235	0.0139468			0.00859769	0.0148701	0.0055313	0	0.0138183
ACSM1	0.0327369	0.0536167	0.042435	0.0716269	0.0515696	0.0389881	0	0.00041925	0.000372724	0.000373299	0	0	0.159034	0.236887	0.16006			0.0429295	0.0540615	0.000263991	0.000124433	0.185327
ACSM2A	0.0221497	0.0209727	0.0185731	0.0185341	0.00113464	0.000951505	0.0123202	0	0	0	0.0118603	0.000736445	0	0.00143628	0			0.0205652	0.00687341	0.00410673	0.00419892	0.00047876
ACSM2B	0.000351991	0.000340604	0	0.000321314	0.000340597	0	0	0	0	0	0	0	0.0177528	0	0			0.000230865	0.000220637	0	0	0.0059176
ACSM3	0.473658	0.278828	0.393806	0.308217	0.18904	0.386995	0.166838	0.321562	0.316862	0.423667	0.490809	0.376599	0.462669	0.478287	0.54613			0.382097	0.294751	0.268421	0.430358	0.495695
ACSM4	0.0235726	0.0262315	0.00904588	0.0284154	0.0159666	0.0180802	0.0313627	0.0182975	0.0420493	0.00698228	0.00686181	0.0144346	0.0178623	0.0140758	0.0180782			0.0196167	0.0208207	0.0305698	0.00942623	0.0166721
ACSM5	0.325117	0.785515	0.378139	0.931525	0.676777	0.738616	0.521537	0.32685	0.337565	0.225263	0.337612	0.260348	0.127447	0.17572	0.208854			0.496257	0.782306	0.395317	0.274408	0.170674
ACSM6	0.00264468	0.00314969	0.00296756	0.00297131	0.0245565	0.00297143	0.00688971	0.000902353	0.00120332	0.00241035	0.00758004	0.0214175	0.00411082	0.00373776	0.0232501			0.00292064	0.0101664	0.00299846	0.0104693	0.0103662
ACSS1	2.68709	2.91477	3.17132	2.26428	2.40209	2.42224	2.90056	3.23773	2.96843	2.42783	2.4848	2.32555	2.79834	2.55469	2.56925			2.92439	2.36287	3.03557	2.41273	2.64076
ACSS2	9.37983	9.63633	10.3723	8.41901	8.77116	9.3433	10.5742	10.6283	9.1443	8.65467	8.63421	8.08001	10.1258	9.35341	9.44212			9.79615	8.84449	10.1156	8.4563	9.64044
ACSS3	3.87011	3.16101	4.58616	2.70302	3.32619	3.76144	2.0067	3.87305	4.00521	4.45864	4.69389	5.63621	2.87961	4.29409	3.67679			3.87243	3.26355	3.29499	4.92958	3.61683
ACTA1	0.317416	0.121768	0.275978	0.304714	0.108154	0.172653	0.200875	0.363147	0.129593	0.149439	0.147304	0.155277	0.228513	0.140348	0.0785989			0.238387	0.195174	0.231205	0.150673	0.149153
ACTA2	44.7241	49.0779	44.3343	51.2861	48.3599	48.4339	48.475	57.8159	49.3351	38.1512	40.254	43.8521	43.5678	44.1381	45.7858			46.0454	49.36	51.8753	40.7524	44.4972
ACTB	2444.37	2555.64	2465.73	2301.97	2473.45	2454.29	2702.67	2819.39	2438.12	2662.48	2633.32	2785.05	2753.41	2715.86	2776.04			2488.58	2409.9	2653.39	2693.62	2748.44
ACTBL2	0.0108551	0	0	0.0396371	0.0105037	0.0264252	0.0262589	0.0336818	0.0107012	0.0214355	0	0.0858296	0.0224424	0.00997207	0.00977196			0.00361837	0.025522	0.0235473	0.035755	0.0140621
ACTC1	0.288572	0.239273	0.0206997	0.833217	0.337307	0.409529	0.132754	0.0719119	0.331612	14.1148	10.9026	16.4447	0.365314	0.515977	0.463302			0.182848	0.526684	0.178759	13.8207	0.448198
ACTG1	1475.42	1443.83	1438.37	1360.46	1460.95	1467.3	1637.91	1637.94	1459.66	1762.79	1669.94	1751.73	1717.9	1720.6	1751.85			1452.54	1429.57	1578.5	1728.15	1730.12
ACTG2	0.523824	0.650039	0.811895	0.456914	0.29468	0.597296	0.704944	0.651749	0.332067	0.313592	0.429978	0.231376	0.682924	0.699148	0.50946			0.661919	0.44963	0.56292	0.324982	0.630511
ACTL10	0.275037	0.526124	0.308454	0.184648	0.185524	0.221944	0.31711	0.357143	0.404756	0.33588	0.573297	0.180063	0.221639	0.106754	0.434304			0.369872	0.197372	0.35967	0.36308	0.254232
ACTL6A	32.5145	33.0516	35.841	28.451	29.1062	30.0124	31.7297	40.187	32.7881	34.8866	34.0901	36.1873	37.1663	36.0971	37.0774			33.8024	29.1899	34.9016	35.0547	36.7803
ACTL6B	0.00426988	0	0.00778568	0.00194887	0.00258229	0.00519721	0	0	0.00420936	0	0.0074576	0.00201127	0.00470624	0.0246591	0.00960956			0.00401852	0.00324279	0.00140312	0.00315629	0.0129916
ACTL7A	0	0	0	0	0.0205619	0	0	0	0	0	0	0	0.0175596	0	0			0	0.00685397	0	0	0.0058532
ACTL7B	0.026958	0	0	0.0492181	0.0260851	0.0328123	0.032606	0	0	0.0266166	0	0.050794	0.0160996	0.0247649	0			0.008986	0.0360385	0.0108687	0.0258035	0.0136215
ACTL8	0.0313843	0.036668	0.00133799	0.0286486	0.0143599	0.0766082	0.113063	0.000271229	0.0607892	0.0748388	0.109635	0	0.0701617	0.0876601	0.0916866			0.0231301	0.0398722	0.0580411	0.0614913	0.0831695
ACTL9	0	0	0	0	0	0	0	0	0	0	0	0	0	0	0			0	0	0	0	0
ACTN1	179.565	173.585	163.448	174.403	179.615	177.078	176.387	145.499	168.936	195.768	181.181	194.243	187.868	189.939	187.641			172.199	177.032	163.607	190.397	188.483
ACTN2	3.31675	4.20625	3.44262	6.83111	4.87461	5.87256	2.67105	2.45258	2.40453	0.480704	0.676219	0.558029	0.74693	0.61308	0.821108			3.65521	5.85943	2.50939	0.571651	0.727039
ACTN3	0.245322	0.144392	0.167562	0.268956	0.120563	0.230148	0.164843	0.117423	0.115569	0.155328	0.199191	0.249529	0.197782	0.275353	0.244704			0.185759	0.206556	0.132612	0.201349	0.23928
ACTN4	145.99	149.092	139.641	132.052	135.851	139.271	160.129	120.224	148.433	146.136	141.171	144.524	152.517	150.233	149.528			144.908	135.725	142.929	143.944	150.759
ACTR10	45.3317	42.7453	44.7209	40.2219	38.3311	39.2732	39.3726	53.8338	48.3047	47.6221	46.928	52.8312	43.8879	45.8931	46.4898			44.266	39.2754	47.1704	49.1271	45.4236
ACTR1A	57.9793	56.624	57.3271	49.4836	55.2672	55.1576	56.5527	61.5959	55.5702	57.4864	58.9984	58.623	58.4981	57.2439	58.0414			57.3101	53.3028	57.9063	58.3693	57.9278
ACTR1B	18.284	17.2437	19.6567	14.4876	17.2188	15.4149	20.4882	19.8074	17.3806	19.4247	18.4645	16.9104	20.2053	21.2473	20.3573			18.3948	15.7071	19.2254	18.2665	20.6033
ACTR2	136.844	128.096	135.495	120.038	125.424	112.242	130.362	103.683	140.554	158.367	145.645	149.122	149.469	140.697	142.208			133.478	119.235	124.866	151.045	144.125
ACTR3	153.876	146.146	149.304	144.234	140.114	141.267	141.021	152.999	149.842	155.723	139.953	152.442	151.888	163.638	156.551			149.775	141.872	147.954	149.373	157.359
ACTR3B	3.07466	3.11593	2.28288	2.79889	2.1959	2.70557	3.41316	3.14305	3.51452	3.37998	3.10058	3.59418	4.19353	3.86817	3.36347			2.82449	2.56679	3.35691	3.35825	3.80839
ACTR3C	0.306816	0.562324	0.213897	0.353025	0.451736	0.230559	0.232179	0.427698	0.37704	0.691108	0.355979	0.399374	0.829431	0.530951	0.385058			0.361012	0.345107	0.345639	0.482154	0.581813
ACTR5	5.62941	5.45236	5.30457	4.56165	4.01125	5.01846	5.19022	5.39222	5.44064	5.70718	5.32867	5.43252	5.82045	5.17468	5.08997			5.46211	4.53045	5.34103	5.48946	5.3617
ACTR6	10.6331	10.3631	12.9767	10.8709	10.7933	10.096	9.35322	12.6455	12.4066	12.4813	12.3528	12.4037	11.1172	12.6072	12.2207			11.3243	10.5867	11.4684	12.4126	11.9817
ACTR8	11.3337	11.1261	10.9539	11.1084	11.4239	11.4425	11.9816	11.9817	11.8847	13.1691	12.2482	13.6629	12.3389	12.7697	13.6438			11.1379	11.3249	11.9493	13.0267	12.9175
ACTRT1	0	0	0	0	0	0	0	0	0	0	0	0	0	0	0			0	0	0	0	0
ACTRT2	0	0	0	0	0	0	0	0	0.029841	0	0	0	0	0	0			0	0	0.009947	0	0
ACTRT3	1.66606	1.82498	2.18582	1.74118	2.14202	1.68115	1.89689	1.61125	1.51893	1.56858	1.57712	2.08249	1.45806	1.80099	1.54908			1.89229	1.85478	1.67569	1.74273	1.60271
ACVR1	16.5899	15.6445	16.8164	16.8815	15.8761	16.0084	15.3656	13.9233	14.6148	15.3396	15.4402	16.0027	14.7233	14.8612	14.8828			16.3503	16.2553	14.6346	15.5942	14.8224
ACVR1B	5.73344	5.17608	4.81591	4.68974	5.10163	4.28605	4.68422	4.45744	5.46992	5.25651	5.24665	5.49502	5.3448	5.47728	5.30912			5.24181	4.69247	4.87053	5.33273	5.37707
ACVR1C	0.12788	0.107437	0.0187409	0.0805111	0.136739	0.0839052	0.100988	0.0227946	0.0371556	0.0345634	0.0199465	0.0472437	0.0520656	0.0275513	0.0698727			0.084686	0.100385	0.0536461	0.0339179	0.0498299
ACVR2A	1.97435	2.20114	2.06386	1.97841	1.71885	1.69512	1.80894	2.23334	2.35172	2.27732	2.53656	2.9554	2.27934	2.66797	1.9483			2.07978	1.79746	2.13133	2.58976	2.29854
ACVR2B	0.320287	0.364553	0.314875	0.525461	0.536489	0.521802	0.335899	0.420411	0.31454	0.443047	0.502265	0.439803	0.337846	0.447265	0.427614			0.333238	0.527917	0.35695	0.461705	0.404242
ACVRL1	18.1149	17.4561	17.0173	15.3214	15.9651	15.4141	18.2205	13.8567	16.8937	19.3194	19.2565	16.3983	17.3826	16.6936	17.5377			17.5294	15.5669	16.3236	18.3247	17.2046
ACY1	15.1344	15.0343	17.5761	12.5939	14.5418	14.8951	14.3429	16.1214	15.2073	17.8125	17.2254	16.5664	15.3815	14.9673	15.1121			15.9149	14.0103	15.2239	17.2014	15.1536
ACY3	0	0	0	0	0.00337818	0	0	0	0	0	0	0	0.00240498	0	0			0	0.00112606	0	0	0.00080166
ACYP1	11.2539	11.4323	8.21381	6.67073	6.86451	7.26238	10.5082	11.3865	10.6097	7.47907	7.58454	7.20575	14.9158	6.82241	10.0841			10.3	6.93254	10.8348	7.42312	10.6074
ACYP2	15.6329	17.4021	17.8332	18.159	19.878	23.1038	14.1585	28.6396	17.1605	7.76136	14.5521	12.8066	15.541	16.3995	16.1357			16.9561	20.3803	19.9862	11.7067	16.0254
ADA	8.26248	8.24305	8.19916	8.17645	8.7976	8.74486	9.64726	10.0163	9.13418	9.11742	7.81286	9.35834	8.71135	9.43977	8.20036			8.2349	8.57297	9.59925	8.76287	8.78383
ADAD1	0	0	0	0	0	0	0	0	0	0	0	0	0	0	0			0	0	0	0	0
ADAD2	0	0	0	0	0	0	0.00581445	0	0	0	0	0	0.0808937	0.0486907	0.106389			0	0	0.00193815	0	0.0786578
ADAL	2.85738	3.00416	1.88741	2.68794	2.26023	2.0976	2.78259	3.87753	2.75572	3.36419	2.4353	3.08976	3.28801	2.24327	2.346			2.58298	2.34859	3.13861	2.96308	2.62576
ADAM10	40.0401	38.963	38.8406	36.1149	37.6377	33.1702	38.4502	28.5704	39.2488	44.8436	42.0834	43.4175	39.5284	38.2037	38.0543			39.2812	35.6409	35.4231	43.4482	38.5955
ADAM11	0.388794	0.361328	0.352519	0.302906	0.341081	0.266599	0.472471	0.346822	0.343091	0.545099	0.346043	0.525168	0.337031	0.541397	0.438327			0.367547	0.303529	0.387461	0.472103	0.438918
ADAM12	9.78104	8.84127	8.99159	11.6341	11.7095	10.4199	7.92997	5.45729	7.4579	9.24549	8.00317	7.72437	9.3323	9.72164	9.45985			9.20463	11.2545	6.94839	8.32434	9.5046
ADAM15	36.3761	37.3929	35.7963	30.2823	33.8103	35.471	40.2712	38.5892	37.6195	37.4909	38.6293	36.2364	39.338	36.7592	40.0361			36.5218	33.1879	38.8266	37.4522	38.7111
ADAM17	9.17944	8.90716	8.60594	9.52647	9.27948	9.61306	8.6078	7.48693	8.2736	10.0485	9.3747	9.30803	8.68016	9.08353	8.6893			8.89751	9.473	8.12278	9.57708	8.81766
ADAM18	0	9.97905e-05	0	0	0.000374207	0	0	0	0	0.00044547	0	9.10807e-05	0	0	0			3.32635e-05	0.000124736	0	0.00017885	0
ADAM19	11.9555	11.6021	11.8593	14.8398	13.5468	12.5951	12.4009	11.3251	11.6105	8.44797	8.41753	9.56718	8.22283	10.9489	9.3352			11.8056	13.6606	11.7788	8.81089	9.50231
ADAM2	0	0	0	0	0	0	0	0.000330187	0	0	0	0.000280516	6.83739e-05	0.000273543	0			0	0	0.000110062	9.35053e-05	0.000113972
ADAM20	0.00526805	0.0256086	0.00139889	0.00288886	0.00600112	0.00171198	0.00766174	0.0438674	0.00151264	0.00414813	0.00581128	0.0124534	0.0181771	0.0120815	0.0356543			0.0107585	0.00353399	0.0176806	0.00747094	0.021971
ADAM21	0.382916	0.293082	0.469559	0.286906	0.222661	0.366463	0.623121	0.373901	0.303866	0.231344	0.458781	0.41865	0.414712	0.486418	0.350181			0.381852	0.29201	0.433629	0.369592	0.417104
ADAM22	0.0362463	0.0480779	0.0515927	0.0374601	0.0217163	0.045957	0.0267642	0.0489159	0.104015	0.0544755	0.0476094	0.0825318	0.137658	0.0656166	0.088859			0.0453056	0.0350445	0.0598984	0.0615389	0.0973779
ADAM23	9.22765	8.05128	9.0739	8.2894	7.92796	7.54284	7.87046	7.97643	8.95241	8.18891	7.76404	8.03302	8.98179	8.81803	8.52463			8.78428	7.92007	8.26643	7.99532	8.77482
ADAM28	0.129245	0.12393	0.266292	0.379163	0.221481	0.21873	0.141173	0.0784804	0.229811	0.127788	0.151537	0.169314	0.157729	0.13861	0.140474			0.173156	0.273125	0.149821	0.149546	0.145604
ADAM29	0	0	0	0	0	0	0	0	0	0	0	0	0	0	0			0	0	0	0	0
ADAM30	0	0	0	0.0236678	0	0.015779	0.0156796	0.0143761	0	0.0127995	0	0	0	0	0			0	0.0131489	0.0100186	0.0042665	0
ADAM32	0.601436	0.602113	0.404056	0.880754	0.501828	0.553103	0.432176	0.574794	0.609385	0.461692	0.378682	0.329879	0.474635	0.411418	0.484979			0.535868	0.645228	0.538785	0.390084	0.457011
ADAM33	20.2621	19.9953	20.6227	11.4213	14.5375	13.8487	22.2041	20.751	20.5692	18.0245	19.4659	18.2165	26.4064	21.5161	21.1575			20.2934	13.2692	21.1748	18.569	23.0267
ADAM7	0.000261731	0.000189948	0	0.000238921	0	0	0	0	0	0	0.000685693	0	0.000112687	0	0.000353423			0.00015056	7.96403e-05	0	0.000228564	0.00015537
ADAM8	0.375051	0.390524	0.29823	0.603877	0.346837	0.446311	1.13542	0.938988	1.08744	0.296997	0.282049	0.290395	0.603494	0.682102	0.515019			0.354602	0.465675	1.05395	0.289814	0.600205
ADAM9	127.839	122.401	127.214	107.549	112.008	104.467	121.835	102.83	127.988	150.55	140.867	141.203	132.657	128.001	130.892			125.818	108.008	117.551	144.207	130.517
ADAMDEC1	0	0.0147645	0	0	0	0	0	0.0321181	0.0300858	0	0	0	0.0199493	0.0266037	0			0.0049215	0	0.0207346	0	0.0155177
ADAMTS1	76.1796	78.8999	69.7199	93.2104	90.2229	85.3732	78.9674	62.9269	73.5696	66.549	60.8152	69.4936	63.9049	66.7965	68.1538			74.9331	89.6022	71.8213	65.6193	66.2851
ADAMTS10	0.164494	0.162744	0.176861	0.3112	0.261624	0.209512	0.203236	0.209793	0.198033	0.123782	0.0939955	0.142925	0.22599	0.223927	0.351735			0.168033	0.260779	0.203687	0.120234	0.267217
ADAMTS12	17.167	16.0108	16.5209	15.0829	16.6331	14.9433	15.6718	11.0215	16.403	18.4342	16.7302	17.7217	17.8288	16.4082	17.3761			16.5662	15.5531	14.3654	17.6287	17.2044
ADAMTS13	0.632244	0.681792	0.602663	0.786488	0.682967	0.508431	0.745556	0.516951	0.620521	0.694614	0.653986	0.688123	0.842407	0.748165	0.545678			0.6389	0.659295	0.627676	0.678908	0.712083
ADAMTS14	0.187867	0.154804	0.145931	0.116494	0.161534	0.0972013	0.170792	0.126344	0.177546	0.226685	0.291805	0.204864	0.298442	0.322178	0.303692			0.162867	0.125076	0.158227	0.241118	0.308104
ADAMTS15	0.0591898	0.0749929	0.116314	0.0328183	0.0460929	0.0419891	0.122305	0.0983165	0.0583507	0.10142	0.0965822	0.100799	0.0815972	0.125285	0.117347			0.0834989	0.0403001	0.0929907	0.0996004	0.108076
ADAMTS16	0.0313829	0.000453678	0.0559497	0.0227482	0.0596885	0.0377291	0.00712408	0.0173821	0.000154067	0.0158265	0.0362741	0.00851245	0.000753606	0.014668	0.000844126			0.0292621	0.0400553	0.00822008	0.0202043	0.00542191
ADAMTS17	0.0186751	0.00104573	0.0167258	0.032617	0.00935516	0.0146835	0.0334053	0.0153446	0.0290331	0.0432446	0.0275288	0.0129633	0.0285654	0.0260925	0.0213621			0.0121489	0.0188852	0.0259277	0.0279122	0.02534
ADAMTS18	0.0340625	0.0194984	0.0224425	0.0912279	0.0276408	0.0227885	0.0333826	0.0373054	0.0153967	0.0160221	0.0756757	0.0133276	0.0122788	0.0694204	0.00910442			0.0253345	0.0472191	0.0286949	0.0350085	0.0302679
ADAMTS19	0.000227248	0.000293196	0	0.0121828	0.00814842	0	0.000427563	0.000373321	0.0130573	0.00729133	0.0153047	0.019349	0.0152853	0.0204288	0.00919934			0.000173481	0.00677707	0.00461939	0.0139817	0.0149711
ADAMTS2	24.3839	25.8182	22.6635	28.1475	26.1385	27.4594	28.0494	19.9793	23.0628	23.6487	24.8445	24.9388	25.349	24.6191	23.1582			24.2885	27.2485	23.6972	24.4773	24.3754
ADAMTS20	0.00947632	0.0176291	0.0127117	0.0147172	0.0112376	0.00910649	0.0116876	0.0120742	0.0114263	0.00939525	0.0122506	0.0100119	0.0111464	0.00830463	0.0153389			0.0132724	0.0116871	0.0117294	0.0105526	0.0115966
ADAMTS3	0.307007	0.383664	0.39803	0.32081	0.317231	0.219361	0.454184	0.334432	0.410061	0.236101	0.191626	0.163927	0.466544	0.541299	0.511187			0.3629	0.285801	0.399559	0.197218	0.506343
ADAMTS4	5.31894	6.61812	5.80507	7.95093	6.91189	7.24908	6.44119	5.74741	5.57367	6.06822	5.84418	6.31199	6.25813	5.98544	5.83777			5.91404	7.37063	5.92076	6.0748	6.02711
ADAMTS5	1.86086	2.26057	1.85637	2.30413	2.35634	2.17361	2.71582	1.66778	2.12494	2.22367	1.90119	1.93577	1.62244	1.29425	1.65271			1.9926	2.27803	2.16951	2.02021	1.52313
ADAMTS6	7.16326	7.48051	6.48408	7.21764	6.52269	6.87828	5.91295	5.59934	6.14493	5.61265	5.67586	6.03945	5.3205	5.35388	5.84373			7.04262	6.87287	5.88574	5.77599	5.50604
ADAMTS7	3.1794	3.38316	2.7686	3.23491	2.6542	2.80951	3.86882	2.97362	3.14586	2.52002	2.57575	2.43075	2.54769	2.61341	2.55314			3.11039	2.89954	3.32943	2.50884	2.57141
ADAMTS8	0.0466664	0.0235966	0.0207888	0.0312229	0.0552281	0.0277547	0.0830011	0.0913301	0.0582444	0.0225139	0.00946223	0.0107407	0.230451	0.270226	0.200369			0.0303506	0.0380686	0.0775252	0.0142389	0.233682
ADAMTS9	0.154177	0.181686	0.233275	0.299988	0.245063	0.200169	0.266372	0.137068	0.200586	0.463804	0.362686	0.415636	0.187936	0.263735	0.201803			0.189713	0.248407	0.201342	0.414042	0.217825
ADAMTSL1	8.9326	9.19887	9.4513	6.31325	6.60801	6.76923	9.59354	7.38143	9.73141	10.6152	9.66409	9.52286	11.3052	11.9166	10.4905			9.19426	6.5635	8.90213	9.93405	11.2374
ADAMTSL2	0.00119363	0.013565	0.00118716	0.0591275	0.0437436	0.0321473	0.183568	0.205515	0.188741	0	0.00101079	0.010293	0.0346533	0.0495894	0.0317749			0.00531526	0.0450061	0.192608	0.00376793	0.0386725
ADAMTSL3	0.0002186	0.000176274	6.64324e-05	0.00980089	0.00722735	0.00861222	4.40669e-05	0.000119277	0.000287336	0.000143889	1.69688e-05	0.000102969	0.000242613	0.000309196	0.00937251			0.000153769	0.00854682	0.000150227	8.79423e-05	0.00330811
ADAMTSL4	38.0078	37.4507	34.6351	26.406	30.091	31.76	38.2898	39.9699	36.3577	43.7176	44.5932	43.4284	39.7473	37.4998	39.9404			36.6979	29.419	38.2058	43.9131	39.0625
ADAMTSL5	2.91819	3.34202	3.58006	2.97714	2.8476	3.01736	3.7355	3.7395	2.70312	2.62959	2.99406	3.69723	2.96231	3.06315	2.83571			3.28009	2.94737	3.39271	3.10696	2.95372
ADAP1	2.31042	2.77999	2.28754	2.63479	2.69989	2.61079	3.26473	2.56319	2.42021	0.680297	1.03567	0.715853	1.20376	1.46798	1.26086			2.45932	2.64849	2.74938	0.810607	1.31087
ADAP2	0.115186	0.082683	0.0620792	0.152097	0.252099	0.132081	8.92891	8.60716	7.94386	0.0680984	0.220619	0.0620243	0.175287	0.177186	0.246086			0.0866494	0.178759	8.49331	0.116914	0.19952
ADAR	100.384	101.488	96.8413	91.6661	94.1689	94.4304	97.0862	79.2486	92.6443	77.0162	82.1729	80.1822	65.9269	76.7034	76.2616			99.5711	93.4218	89.6597	79.7904	72.964
ADARB1	12.6695	12.4723	12.0127	16.4286	14.4904	14.9357	11.3335	8.03471	9.86957	23.0434	25.369	24.6471	15.0059	16.1999	15.778			12.3848	15.2849	9.74593	24.3532	15.6613
ADARB2	0.000112881	8.49561e-05	0.000121971	0.000125942	6.47272e-05	0.000106864	0.0171429	0.000165969	0.000433349	0.000127964	8.17822e-05	0.000110281	0.00238337	0.00010293	0.000101618			0.000106603	9.91777e-05	0.00591407	0.000106676	0.000862639
ADAT1	4.89495	4.75361	3.89811	4.24435	4.30487	5.03512	4.50759	2.88378	4.86656	5.67439	4.69981	5.2732	5.80786	5.57769	5.12833			4.51556	4.52811	4.08598	5.2158	5.50463
ADAT2	8.14745	9.17169	5.6217	6.54455	6.59338	8.66963	7.87206	7.13181	6.85224	6.63177	7.64612	7.27238	8.41893	8.12771	7.55986			7.64695	7.26919	7.28537	7.18342	8.0355
ADAT3	1.40822	1.73232	1.08418	1.68203	1.35793	1.87482	1.16606	1.23225	1.45526	0.773575	1.05312	0.748929	2.03327	1.31539	1.34134			1.40824	1.63826	1.28452	0.858541	1.56333
ADCK1	2.62263	2.65327	2.38063	3.32497	3.26249	3.27812	2.46486	2.78578	2.94713	2.25894	2.2318	2.61029	2.76382	3.00846	2.92539			2.55218	3.28853	2.73259	2.36701	2.89922
ADCK2	6.0615	5.17521	5.70408	4.33746	5.39764	4.59568	6.35426	6.45837	5.99912	5.84461	5.58576	6.11936	5.91293	5.49539	6.12641			5.64693	4.77693	6.27058	5.84991	5.84491
ADCK3	4.70133	4.85124	4.37953	4.30757	4.33852	4.95979	5.12837	5.16559	4.69159	4.92775	5.03822	4.36854	4.25706	3.69834	4.00303			4.64403	4.53529	4.99518	4.77817	3.98614
ADCK4	4.64485	5.10258	4.01766	5.18858	5.17154	5.26187	5.10185	5.18361	4.91325	4.18437	4.75093	3.99749	5.90781	5.61261	5.55818			4.58836	5.20733	5.06624	4.31093	5.69287
ADCK5	2.34492	2.00786	2.42789	2.05832	2.14297	2.13316	2.29599	2.2574	2.22044	2.21987	2.45916	1.92287	2.68598	2.47873	2.57263			2.26022	2.11148	2.25794	2.20063	2.57911
ADCY1	0.199933	0.231824	0.214473	0.258271	0.210988	0.164474	0.253947	0.151951	0.347311	0.249301	0.194435	0.455184	0.244247	0.329771	0.220427			0.21541	0.211244	0.25107	0.29964	0.264815
ADCY10	0.049806	0.097922	0.100542	0.17611	0.0856919	0.107876	0.0565164	0.100944	0.0439112	0.0207802	0.0162806	0.0137351	0.0607245	0.0916325	0.0875053			0.0827567	0.123226	0.0671239	0.016932	0.0799541
ADCY2	0.000129571	0.0278129	0.000295322	0.000236556	0.0370837	0.00010514	0.0233907	0.0107669	0.0189533	0.0189266	0.011305	0.0293459	0.0191936	0.000158707	0.021073			0.0094126	0.0124751	0.0177036	0.0198592	0.0134751
ADCY3	21.197	20.7945	19.5783	21.1377	20.4194	20.8212	21.9617	18.141	19.8595	21.3818	19.7774	20.9159	22.3221	21.9381	21.9201			20.5233	20.7928	19.9874	20.6917	22.0601
ADCY4	0.206297	0.196094	0.255163	0.48354	0.249491	0.272301	0.252054	0.216196	0.175994	0.10817	0.128911	0.119803	0.186184	0.100927	0.208542			0.219185	0.335111	0.214748	0.118961	0.165218
ADCY5	0.0479186	0.103106	0.0733505	0.0503736	0.0788278	0.057084	0.105109	0.070748	0.0576086	0.0458218	0.0727539	0.076666	0.0476315	0.090977	0.0889123			0.0747917	0.0620951	0.0778219	0.0650806	0.0758403
ADCY6	5.82973	6.12717	5.57963	5.28767	5.45626	5.5042	6.08366	4.75107	5.34661	6.37361	6.40866	6.24664	6.59505	5.65357	5.71581			5.84551	5.41604	5.39378	6.34297	5.98814
ADCY7	16.8591	16.7083	16.4278	14.8385	15.3685	14.337	18.0347	14.039	17.1272	16.0912	15.8755	15.5962	16.6695	16.2576	17.2916			16.6651	14.848	16.4003	15.8543	16.7396
ADCY8	0.0168691	0.0406147	0.0156697	0.0385635	0.0324262	0.0102007	0.00721233	0.0188439	0.0214759	0.000106239	0.00975538	0.0317383	0.0206653	0.0589641	0.0455275			0.0243845	0.0270635	0.015844	0.0138666	0.041719
ADCY9	4.29463	4.16051	4.21831	3.90875	4.14818	4.13652	4.35864	3.20734	4.37418	5.21754	5.3156	4.59629	4.84605	4.46813	4.7315			4.22448	4.06448	3.98005	5.04314	4.68189
ADCYAP1	0	0	0	0	0.0091151	0	0	0	0	0	0	0	0.0264885	0.0259687	0.0132723			0	0.00303837	0	0	0.0219098
ADCYAP1R1	0.15896	0.109286	0.106998	0.0949	0.0943348	0.0494494	0.209199	0.145167	0.113038	0.182906	0.25623	0.063787	0.096469	0.0664269	0.0935484			0.125081	0.0795614	0.155801	0.167641	0.0854814
ADD1	60.9472	61.107	59.1383	60.5404	59.9231	60.5694	59.2432	54.1121	56.7662	59.3649	57.8705	58.7942	60.7797	59.1826	58.9958			60.3975	60.3443	56.7072	58.6765	59.6527
ADD2	0.0434161	0.0369972	0.0395529	0.0259692	0.0561079	0.0268012	0.0386065	0.026435	0.00772245	0.0800933	0.059862	0.0682658	0.0765789	0.167822	0.120056			0.0399887	0.0362928	0.0242547	0.069407	0.121486
ADD3	17.4812	19.5858	18.6583	18.5706	17.466	15.6224	17.4499	14.599	19.0465	21.073	20.1637	20.3093	19.9449	18.4674	18.091			18.5751	17.2197	17.0318	20.5153	18.8344
ADGB	0.0253932	0.022058	0.0202496	0.0180619	0.0189154	0.0188663	0.0211827	0.0259736	0.0264418	0.0215238	0.0235932	0.0255741	0.0255187	0.027116	0.0276535			0.0225669	0.0186145	0.0245327	0.0235637	0.0267627
ADGRA1	0	0	0	0	0	0	0.0719463	0.0188268	0.055445	0	0	0	0.000319668	0	5.96775e-05			0	0	0.0487394	0	0.000126449
ADGRA2	12.6288	12.6625	12.5981	10.6685	10.8579	11.14	14.1168	10.236	12.5295	19.6066	22.2213	19.1766	14.8352	13.5705	12.8977			12.6298	10.8888	12.2941	20.3348	13.7678
ADGRA3	4.97134	4.11669	5.01435	4.3787	4.30439	3.93403	4.65631	4.79186	5.58029	7.14909	6.9386	6.9425	8.04834	7.30682	6.55679			4.70079	4.20571	5.00949	7.01006	7.30398
ADGRB1	1.19488	1.03119	0.989893	1.27757	0.911919	1.21782	1.60206	0.750774	1.15841	0.723308	0.87272	0.8037	1.2627	1.20396	1.3134			1.07199	1.13577	1.17041	0.799909	1.26002
ADGRB2	1.23515	1.39322	1.24045	1.10757	0.984449	1.04343	2.03036	1.82804	1.58603	1.77467	1.53027	1.51635	1.53001	1.35581	1.36475			1.28961	1.04515	1.81481	1.6071	1.41686
ADGRB3	0.120333	0.0776696	0.103813	0.124626	0.170119	0.103399	0.145603	0.0806538	0.129796	0.132293	0.13348	0.130954	0.22693	0.200947	0.250211			0.100605	0.132715	0.118684	0.132242	0.226029
ADGRD1	0.115181	0.0799299	0.0648253	0.0868189	0.120492	0.029311	0.107377	0.0737796	0.0746754	0.0174394	0.02281	0.00742144	0.00123957	0.0217087	0.0371968			0.0866454	0.078874	0.0852773	0.0158903	0.0200484
ADGRD2	0	0	0	0.00193703	0	0	0	0.00235302	0	0	0	0.000999522	0.00146176	0	0.000955116			0	0.000645677	0.00078434	0.000333174	0.000805625
ADGRE1	0.0151323	0.000171951	0	0.000486638	0	0	0	0.00118229	0.000175181	0.000526354	0	0.000502218	0	0	0			0.00510142	0.000162213	0.00045249	0.000342857	0
ADGRE2	4.80598	4.92717	4.25681	5.2895	4.81533	4.59263	4.83259	3.46629	4.12603	4.96117	4.43786	4.65656	4.64819	4.96241	4.6473			4.66332	4.89915	4.14164	4.6852	4.75263
ADGRE3	8.26326	8.46602	8.60909	7.56746	7.86428	7.33825	7.53371	9.11266	8.1904	8.68515	8.45181	9.00343	9.21835	8.95714	8.76985			8.44612	7.59	8.27892	8.71346	8.98178
ADGRE5	48.5345	50.7737	46.6059	46.6543	44.9181	46.2054	51.4105	46.4373	45.5569	51.7267	50.8415	51.5972	44.2894	44.8485	45.3192			48.638	45.9259	47.8016	51.3885	44.819
ADGRF1	0.000631961	0	0	0	0.0220459	0	0	0	0.000623004	0	0	0.000595352	0	0	0			0.000210654	0.00734863	0.000207668	0.000198451	0
ADGRF2	0	0.0157926	0	0.0156586	0.00552725	0.00695014	0	0	0.00067547	0	0	0.00064549	0	0.00524016	0			0.0052642	0.00937866	0.000225157	0.000215163	0.00174672
ADGRF3	0.0861412	0.0736906	0.0872354	0.108786	0.0841029	0.143671	0.114118	0.0549495	0.0380719	0.0375428	0.0873984	0.117165	0.204997	0.115462	0.310846			0.0823557	0.112187	0.0690465	0.0807021	0.210435
ADGRF4	0.00950376	0	0.0272175	0.0347026	0.0288875	0.0362629	0.0180543	0	0	0	0	0	0.000831921	0.00110942	0.0134374			0.0122404	0.0332843	0.0060181	0	0.00512625
ADGRF5	0.000274773	0	0.0184454	0.00745869	0.0147799	0.00995102	0	0	0	0	0.00951932	0.00966672	0.00563186	0.000252421	0			0.00624006	0.0107299	0	0.00639535	0.00196143
ADGRG1	0.410658	0.383554	0.474841	0.660453	0.543093	0.384981	1.22317	1.15071	1.14577	0.248877	0.264857	0.202486	0.407048	0.409669	0.37424			0.423018	0.529509	1.17322	0.23874	0.396986
ADGRG2	0.0832004	0.0942417	0.0817463	0.0774558	0.0631574	0.0696616	0.132372	0.0733918	0.114585	0.0615082	0.0551935	0.066889	0.0689142	0.117704	0.0813486			0.0863961	0.0700916	0.106783	0.0611969	0.0893223
ADGRG3	0	0.00259138	0	0	0	0	0.0471332	0	0.0158703	0	0	0	0	0	0			0.000863793	0	0.0210012	0	0
ADGRG4	0.00959751	0.000469764	0.00578126	0.0189338	0.00661312	0	0	0	0	0.0134852	0	0.00390661	5.57376e-05	0.00380983	0.000437028			0.00528284	0.00851564	0	0.00579727	0.0014342
ADGRG5	0.000696355	0.0236775	0.00118972	0	0.00320258	0.00155859	0	0	0.00481595	0.00197145	0.00153184	0.000589268	0.0182942	0.0244123	0.00797024			0.00852119	0.00158706	0.00160532	0.00136419	0.0168922
ADGRG6	0	0.00848467	7.10773e-05	0.0157746	0.00848424	0	0.020126	0.000216126	0.0172901	0.0164292	0.00968554	0.00826052	0.0332279	0.0161768	0.0237739			0.00285192	0.00808628	0.0125441	0.0114584	0.0243929
ADGRG7	0.0148017	0.0352684	0.039187	0.0255165	0.0187337	0.00339219	0.0039657	0.00466586	0.0048484	0.00226607	0.00400855	0.00355212	0.0195005	0.00527103	0.00378786			0.0297524	0.0158808	0.00449332	0.00327558	0.0095198
ADGRL1	0.524997	0.416986	0.433973	0.432378	0.306906	0.398692	0.698339	0.458145	0.533209	0.52043	0.602897	0.412725	0.53806	0.423858	0.596575			0.458652	0.379325	0.563231	0.512017	0.519498
ADGRL2	6.62643	6.18101	7.13208	5.08301	5.31854	5.50256	6.68364	5.76694	7.30171	8.17559	7.92993	8.02603	9.19971	8.54541	8.64859			6.64651	5.30137	6.5841	8.04385	8.7979
ADGRL3	0.000303169	0.000494522	0.000221118	0.000565485	0.000392444	0.00036901	0.00102556	0.00104793	0.000409169	0.00744674	0.000633049	0.000626747	0.000612874	0.000492441	0.00428966			0.000339603	0.000442313	0.000827553	0.00290218	0.00179832
ADGRL4	10.8247	10.0841	10.6568	9.08097	9.3866	9.40944	8.85155	9.59203	11.4356	9.06052	8.39996	7.73271	10.3281	10.484	10.3771			10.5219	9.29234	9.95973	8.39773	10.3964
ADGRV1	0.000673082	0.00750137	0.00386873	0.000708752	0.00378415	0.00428722	0.00451109	0.00236039	0.0032654	0.0026233	0.00356225	0.00286025	0.00877518	0.00319597	0.00822887			0.00401439	0.00292671	0.00337896	0.00301527	0.00673334
ADH1A	0.00194326	0.0285943	0.00354333	0.0366814	0.0204117	0.0189224	0.00470083	0.00215487	0.0299484	0.0295615	0.00905072	0.00732276	0.0412456	0.0274894	0.027361			0.0113603	0.0253385	0.012268	0.0153117	0.032032
ADH1B	0.316116	0.386766	0.513754	1.25728	0.85699	0.680079	0.337655	0.387494	0.619055	0.65706	0.536635	0.602288	0.388299	0.365438	0.348941			0.405545	0.93145	0.448068	0.598661	0.367559
ADH1C	0.00171848	0.0338752	0	0.000392178	0.0338782	0	0.100715	0.033791	0.00169412	0	0	0	0	0	0.00154701			0.0118646	0.0114235	0.0454	0	0.00051567
ADH4	0.00137526	0.00133077	0.0125382	0.0883745	0.00266148	0.0729172	0.00665361	0.0689408	0.0040673	0.00543142	0.0368672	0.00129559	0.00189475	0.0393367	0.00247606			0.00508141	0.0546511	0.0265539	0.0145314	0.0145692
ADH5	81.8618	79.0545	79.2138	67.1248	74.0083	70.9425	82.956	85.0233	82.7791	82.9123	81.9818	86.0822	82.2192	85.1799	83.8318			80.0434	70.6919	83.5861	83.6588	83.7436
ADH6	0.0548071	0.0497199	0.0468444	0.111766	0.0364601	0.0333551	0.0310735	0.0434229	0.0438996	0.0439672	0.0444216	0.0387241	0.0448354	0.0487752	0.03392			0.0504571	0.0605271	0.0394653	0.042371	0.0425102
ADH7	0	0	0	0.0135241	0.000589836	0	0	0	0	0	0.000473176	0	0	0.00111996	0			0	0.00470465	0	0.000157725	0.00037332
ADHFE1	0.325578	0.213667	0.225449	0.239791	0.311985	0.229026	0.211489	0.262396	0.318756	0.322049	0.361329	0.231159	0.607867	0.456255	0.384932			0.254898	0.260267	0.264214	0.304846	0.483018
ADI1	50.891	52.7614	55.138	41.5364	46.668	43.7061	51.0986	60.0025	53.2338	54.8469	60.9567	59.5741	62.6196	55.9884	61.6168			52.9301	43.9702	54.7783	58.4592	60.0749
ADIG	0	0.00769778	0	0	0.00384881	0.0193656	0.0096219	0	0	0	0.00463137	0.0074943	0.0425105	0.00730801	0.010742			0.00256593	0.00773814	0.0032073	0.00404189	0.0201868
ADIPOQ	0	0	0	0	0	0	0	0	0.00177649	0	0	0	0	0.04878	0			0	0	0.000592163	0	0.01626
ADIPOR1	40.4342	44.0059	43.869	46.1347	46.3578	43.0522	40.9533	46.9493	42.2142	44.8306	42.8025	43.9355	44.5691	40.6255	40.7773			42.7697	45.1816	43.3723	43.8562	41.9906
ADIPOR2	23.5502	23.3308	24.3168	22.7527	22.6543	21.7942	21.6396	22.5528	23.4799	22.248	22.9425	23.3902	25.3819	24.2192	23.8851			23.7326	22.4004	22.5574	22.8602	24.4954
ADIRF	65.8619	88.7706	82.7121	81.2102	88.287	84.0793	116.096	117.046	93.2144	71.037	75.4972	79.6338	81.8748	95.1356	88.1876			79.1149	84.5255	108.785	75.3893	88.3993
ADK	91.1287	85.0119	94.7459	65.867	71.0681	71.896	82.1001	108.928	93.394	92.8184	93.1059	92.9303	94.9786	106.122	101.159			90.2955	69.6104	94.8074	92.9515	100.753
ADM	140.299	148.033	134.552	210.817	202.4	206.948	137.501	135.588	128.911	150.051	168.98	168.168	110.674	108.154	119.151			140.961	206.722	134	162.4	112.66
ADM2	1.52552	1.87406	1.33886	2.5153	1.8077	2.10817	1.89913	1.44078	1.39523	0.406095	0.504429	0.435794	0.411553	0.457541	0.697539			1.57948	2.14372	1.57838	0.448773	0.522211
ADM5	1.50905	1.74865	1.61934	1.2127	1.27276	1.81855	1.73551	1.87666	1.37523	2.15343	2.41368	1.95882	2.86378	1.65761	2.24701			1.62568	1.43467	1.66247	2.17531	2.25613
ADNP	19.7571	19.2932	20.4502	18.2446	17.2208	18.4524	17.8844	13.5068	17.8333	19.7072	19.6575	20.092	19.1314	19.3224	18.5438			19.8335	17.9726	16.4082	19.8189	18.9992
ADNP2	8.58834	8.38882	7.61296	9.19737	8.32989	8.77446	7.53593	5.8699	6.84248	6.44472	6.50641	6.42397	6.86703	6.64515	7.12405			8.19671	8.76724	6.74944	6.45837	6.87874
ADO	9.3511	9.67449	9.4063	9.19219	9.56611	8.81592	8.36445	10.2812	8.75409	8.13682	9.00064	8.56115	9.50027	9.43405	9.84859			9.4773	9.19141	9.13325	8.5662	9.5943
ADORA1	0.0259872	0.0708359	0.0473862	0.0701694	0.025146	0.0158152	0.15933	0.076818	0.0256189	0.0611057	0	0.036723	0.0714612	0.181994	0.0586197			0.0480698	0.0370435	0.0872556	0.0326096	0.104025
ADORA2A	0.355666	0.250103	0.294092	0.453516	0.345278	0.236078	0.686849	0.519815	0.465005	0.158112	0.161545	0.188085	0.44539	0.401952	0.319889			0.299954	0.344957	0.557223	0.169247	0.389077
ADORA2B	2.63284	3.55071	3.2193	2.48669	2.8679	2.58779	5.62298	3.55158	3.38348	3.7941	3.34568	2.3368	3.27566	3.45377	5.49357			3.13428	2.64746	4.18601	3.15886	4.07433
ADORA3	0.0374047	0	0	0.0162878	0	0	0.107505	0.0201644	0.0176258	0	0.0207787	0	0.0498636	0.0340289	0			0.0124682	0.00542927	0.0484317	0.00692623	0.0279642
ADPGK	31.3995	28.9364	31.1513	29.9752	31.2044	31.2783	31.5596	29.2797	28.6977	35.8293	35.6699	36.6446	30.4213	32.5847	33.6415			30.4957	30.8193	29.8457	36.0479	32.2158
ADPRH	2.00818	1.84787	1.53282	1.59832	1.7747	2.00515	1.97388	2.28333	1.95058	2.06433	2.04855	2.20497	2.1324	2.11292	2.43383			1.79629	1.79272	2.06926	2.10595	2.22638
ADPRHL1	1.21347	1.37734	1.51725	1.36745	1.3249	1.17743	1.35305	1.56555	1.44256	1.5013	1.48719	1.77216	1.5772	1.54661	1.21553			1.36935	1.28993	1.45372	1.58688	1.44645
ADPRHL2	25.8023	28.6784	22.8392	25.1898	27.9947	27.8956	26.081	26.1405	24.3134	22.1695	20.0331	19.0811	19.7949	21.2521	21.8538			25.7733	27.0267	25.5116	20.4279	20.9669
ADPRM	6.83035	7.18207	6.80964	7.62593	8.06754	7.85392	6.48089	7.18901	5.62604	4.98428	4.82504	4.52868	5.24783	6.00196	5.9404			6.94069	7.84913	6.43198	4.77933	5.73006
ADRA1A	0.00252086	0.0143668	0.0272034	0.0240712	0.0765048	0.0472841	0.0192677	0.01638	0.037913	0.00948835	0.0301051	0.0129973	0.080732	0.0948214	0.0572683			0.014697	0.0492867	0.0245202	0.0175303	0.0776072
ADRA1B	1.15011	0.816941	0.783182	0.983215	1.21717	0.571397	1.14988	0.757489	1.097	1.28855	1.79658	1.81526	0.497738	0.59622	0.621786			0.916744	0.923927	1.00146	1.63346	0.571915
ADRA1D	0.731644	0.631033	0.522312	0.898782	0.73018	0.724104	0.387591	0.596274	0.506903	0.237725	0.385653	0.398266	0.653525	0.745658	0.596684			0.62833	0.784355	0.496923	0.340548	0.665289
ADRA2A	0	0	0	0.0212411	0.0148141	0	0.00925869	0.0254661	0	0	0.00891308	0.0144228	0.0632784	0.0492251	0.0344556			0	0.0120184	0.0115749	0.00777863	0.0489864
ADRA2B	0.0177524	0	0	0.00810261	0.00858887	0	0.139568	0.137804	0.0700032	0.00876387	0	0	0.0122291	0.0223398	0.00799051			0.00591747	0.00556383	0.115792	0.00292129	0.0141865
ADRA2C	0.368841	0.170693	0.204665	0.453751	0.325834	0.292756	0.775767	0.9958	0.695522	0.174149	0.261383	0.256798	0.13255	0.265144	0.173216			0.248066	0.357447	0.822363	0.230777	0.190303
ADRB1	0.0105772	0.010235	0	0.0386216	0.0217918	0.0285366	0	0	0	0.0208867	0.0799307	0.0199289	0	0.0210152	0.00952178			0.0069374	0.02965	0	0.0402488	0.010179
ADRB2	3.10594	3.4283	3.67335	3.16861	3.13608	2.18458	3.96994	3.50186	3.24382	2.31852	2.33644	2.58104	3.07262	2.74931	3.43443			3.40253	2.82976	3.57187	2.412	3.08545
ADRB3	0	0	0	0	0	0	0	0	0	0	0	0	0	0	0			0	0	0	0	0
ADRBK1	14.5777	14.0786	15.0753	16.6098	16.2256	16.2219	16.9666	14.0847	14.2877	14.267	13.9188	14.7369	15.3524	15.251	15.0473			14.5772	16.3524	15.113	14.3076	15.2169
ADRBK2	0.687464	0.52013	0.772143	0.728777	0.697675	0.898109	0.732536	0.324958	0.660528	0.784002	0.646107	0.492385	0.858487	0.971573	0.964282			0.659912	0.774854	0.572674	0.640831	0.931447
ADRM1	69.8017	71.657	64.2445	76.8562	74.4495	76.488	77.4339	78.4297	64.4558	64.5778	66.5215	65.8737	73.5829	69.35	70.7197			68.5677	75.9312	73.4398	65.6577	71.2175
ADSL	36.9297	37.1436	33.7682	27.9106	32.0327	34.3845	38.5484	41.4245	36.3054	43.5458	41.1272	39.2491	43.1132	44.7456	43.1981			35.9472	31.4426	38.7594	41.3074	43.6856
ADSS	39.1471	36.1463	43.174	36.1419	37.2366	37.4272	34.3457	39.4466	38.9044	39.0401	36.4691	38.1711	38.2844	40.8943	38.5212			39.4891	36.9352	37.5656	37.8934	39.2333
ADSSL1	0.238143	0.316387	0.174502	0.62978	0.282334	0.272573	2.04427	1.72548	1.52777	0.512962	0.655317	0.566406	0.330786	0.317882	0.538099			0.243011	0.394896	1.76584	0.578228	0.395589
ADTRP	1.20843	1.13797	0.721434	1.30581	0.895556	0.957889	1.1395	1.48583	1.15786	0.841848	0.612321	0.805636	0.960841	0.992371	1.26996			1.02261	1.05309	1.26106	0.753268	1.07439
AEBP1	131.233	135.805	128.611	121.665	122.902	125.939	141.396	112.937	131.705	150.873	154.939	154.256	130.181	122.72	124.669			131.883	123.502	128.679	153.356	125.857
AEBP2	11.954	11.8547	10.8588	11.0968	9.88284	11.2993	11.5445	8.93738	10.7067	9.15213	9.09832	10.5223	8.82705	10.8253	9.80844			11.5558	10.7596	10.3962	9.59092	9.82026
AEN	27.4839	31.3381	29.3223	32.8828	31.6511	31.8736	27.7726	27.1311	24.3429	18.9603	19.9074	18.4482	22.8958	21.8013	22.5989			29.3814	32.1358	26.4155	19.1053	22.432
AES	123.812	140.64	120.701	149.276	147.692	150.334	148.199	125.243	115.023	110.77	119.336	110.833	106.752	109.13	109.229			128.384	149.101	129.488	113.646	108.37
AFAP1	15.1329	14.4675	14.5964	13.6343	14.4045	14.1902	14.4483	10.8651	14.1431	16.8519	14.7412	15.6872	16.2289	15.0337	15.2846			14.7323	14.0763	13.1522	15.7601	15.5157
AFAP1L1	7.72145	7.3335	8.09187	7.6442	7.25412	8.15258	7.59261	6.21427	7.26122	6.33198	7.10564	6.53362	6.46338	7.05777	7.07428			7.71561	7.68363	7.0227	6.65708	6.86514
AFAP1L2	0.0153698	0.0234855	0.000107965	0.0148747	0.049569	0.0185702	0.029462	0.00895829	0.00022736	0.0251351	0.0438244	0.0287567	0.0372846	0.0347698	0.0335046			0.0129878	0.0276713	0.0128825	0.0325721	0.0351863
AFF1	8.73721	8.3023	8.48606	7.35595	7.56435	7.14447	8.09943	6.64492	8.62546	10.8146	10.0164	10.7563	9.00252	8.94398	8.80583			8.50852	7.35492	7.78994	10.5291	8.91744
AFF2	0.0216313	0.0226362	0.042431	0.0676625	0.044141	0.0643851	0.0384091	0.0129054	0.015363	0.0114868	0.0181203	0.0137923	0.0677058	0.0350732	0.0279717			0.0288995	0.0587295	0.0222258	0.0144665	0.0435836
AFF3	0.0404603	0.0570373	0.0148778	0.0432578	0.0137937	0.0198715	0.058693	0.0196656	0.0104869	0.0035039	0.000164514	0.0228356	0.026871	0.032904	0.0362324			0.0374585	0.025641	0.0296152	0.00883467	0.0320025
AFF4	19.9536	19.832	19.9959	21.9163	19.7069	17.9601	17.5378	15.0165	19.7747	18.2823	16.8444	18.4158	18.1324	18.6841	17.716			19.9272	19.8611	17.443	17.8475	18.1775
AFG3L2	27.3556	24.9537	28.442	22.1068	23.5607	21.9884	25.5312	24.4774	27.1788	27.6175	27.2468	28.6523	30.8222	30.8113	30.7257			26.9171	22.552	25.7291	27.8389	30.7864
AFM	0	0.00123282	0	0.0160866	0.00123279	0.0214496	0	0	0.00125598	0	0	0	0	0	0			0.00041094	0.012923	0.00041866	0	0
AFMID	13.4772	15.2154	14.2279	14.4561	13.5791	16.657	15.6114	17.9752	15.4732	15.8965	15.9974	17.0788	14.8729	16.1254	17.5695			14.3068	14.8974	16.3533	16.3242	16.1893
AFP	0.0528101	0.0682849	0.00157735	0.0852705	0.0896881	0.149235	0.0751949	0.0849835	0.10242	0.0605285	0.121991	0.173873	0.0966168	0.0999234	0.11129			0.0408908	0.108065	0.0875328	0.118798	0.10261
AFTPH	6.50458	6.21208	5.74767	6.31988	5.85721	5.83454	4.90098	5.51032	5.74997	5.38409	4.91333	4.7441	5.78769	5.38146	5.35921			6.15478	6.00388	5.38709	5.01384	5.50945
AGA	5.21239	7.1358	5.0093	6.81094	6.5002	7.13909	5.98078	8.07447	6.25531	8.32601	6.62646	7.90052	6.73165	7.03327	7.01345			5.78583	6.81674	6.77019	7.61766	6.92612
AGAP1	7.08211	6.98386	6.79081	7.40685	7.30698	7.3029	7.82303	4.91512	6.55412	8.92887	8.32221	8.0807	8.80935	7.60165	7.49428			6.95226	7.33891	6.43076	8.44393	7.96843
AGAP11	1.0368	1.23061	1.19038	1.27598	1.0804	1.24775	1.30057	0.56868	0.902639	0.802431	0.567236	0.855568	0.899663	0.864305	0.561966			1.1526	1.20138	0.923963	0.741745	0.775311
AGAP2	1.01498	0.95875	1.02516	0.877582	0.90938	1.0437	1.02322	0.990159	0.868023	0.792873	0.928139	0.762907	0.804026	0.873543	0.897813			0.99963	0.943554	0.960467	0.827973	0.858461
AGAP3	21.5585	22.0302	21.3742	22.1304	22.5363	21.5354	25.9911	19.6164	23.3369	21.0962	22.5773	21.6283	25.8597	22.9809	22.8973			21.6543	22.0674	22.9815	21.7673	23.9126
AGAP4	4.38045	4.96826	4.4344	5.01948	4.85435	4.44208	4.72866	4.1971	3.54389	2.96093	3.3124	3.30995	4.2134	4.02411	3.64086			4.59437	4.77197	4.15655	3.19443	3.95946
AGAP5	2.40381	2.37093	1.85868	2.62746	2.35017	2.23587	2.459	1.87754	1.815	1.30253	1.56634	1.63548	1.97439	2.11189	2.10177			2.21114	2.4045	2.05051	1.50145	2.06268
AGAP6	8.32991	8.93568	8.00489	10.1045	7.83264	9.45374	7.01827	7.07368	6.24689	4.76509	5.68511	5.6177	7.38837	6.91425	6.97789			8.42349	9.13029	6.77961	5.35597	7.0935
AGAP9	2.70084	3.17401	2.33923	2.60765	2.20554	2.39599	2.98778	2.07023	2.16316	1.80448	1.94345	1.72488	2.72615	2.30672	2.46384			2.73803	2.40306	2.40706	1.82427	2.4989
AGBL1	0.000167369	9.28853e-05	2.69275e-05	2.69615e-05	0.000109555	8.38836e-05	3.57239e-05	8.18787e-05	1.94113e-05	9.72062e-05	0	1.85498e-05	0.000101731	5.4266e-05	0.000130727			9.57273e-05	7.34667e-05	4.56713e-05	3.85853e-05	9.55747e-05
AGBL2	0.373584	0.337224	0.256831	0.26888	0.301249	0.256165	0.196669	0.189213	0.174685	0.244012	0.282594	0.120617	0.212143	0.315107	0.267802			0.322546	0.275431	0.186856	0.215741	0.265017
AGBL3	0.134282	0.096734	0.178259	0.0729641	0.0913124	0.0758535	0.0598746	0.0302774	0.0884315	0.0700858	0.0776394	0.089738	0.139179	0.092631	0.133286			0.136425	0.0800433	0.0595278	0.0791544	0.121699
AGBL4	2.31551e-105	3.53023e-06	0	6.4638e-105	1.78608e-220	0.0605108	0	0	1.95604e-225	0.0449105	0	0.0112237	0	2.03071e-95	1.64186e-05			1.17674e-06	0.0201703	6.52013e-226	0.0187114	5.47287e-06
AGBL5	6.01046	5.71988	5.91699	5.44614	5.66765	6.14319	5.87392	6.11436	5.90243	7.64901	7.19217	7.05487	6.70647	6.4935	7.19562			5.88244	5.75233	5.96357	7.29868	6.79853
AGER	1.47679	1.88688	1.80479	1.70298	1.59452	1.58057	2.09904	1.62764	1.71238	1.11473	1.3361	1.48314	1.69529	0.906858	1.38766			1.72282	1.62602	1.81302	1.31132	1.32994
AGFG1	28.2131	30.1629	27.569	29.5392	27.4245	28.2663	25.4847	24.9561	25.8828	29.873	30.3248	28.7779	27.7347	27.5097	27.9359			28.6483	28.41	25.4412	29.6586	27.7268
AGFG2	2.99655	2.57472	2.77327	1.71006	2.46002	2.3203	2.93076	2.98933	3.17664	3.41857	3.94224	3.88973	3.83448	3.43109	4.38174			2.78151	2.16346	3.03224	3.75018	3.88244
AGGF1	10.467	9.80803	10.8689	9.24775	9.38322	9.01068	9.50634	8.5923	10.7867	10.7983	10.8235	10.6339	10.0972	10.3844	10.4422			10.3813	9.21388	9.62845	10.7519	10.3079
AGK	13.8773	14.4329	15.1526	11.7184	13.859	13.7027	15.0724	13.6957	15.225	15.824	16.0178	15.996	16.4497	16.1243	16.1105			14.4876	13.0934	14.6644	15.9459	16.2282
AGL	2.53244	2.53849	2.60167	2.26521	1.90839	1.97774	2.69167	1.76777	2.54085	2.76459	2.57201	2.65594	2.94209	3.12357	2.96503			2.55753	2.05045	2.33343	2.66418	3.01023
AGMAT	2.08343	1.75331	1.92718	2.23643	1.76351	2.42183	1.96233	1.68543	2.26128	1.84227	2.3225	2.79718	2.58848	2.11119	2.26234			1.92131	2.14059	1.96968	2.32065	2.32067
AGMO	0.102385	0.0426558	0.0802248	0.0699514	0.127727	0.0645223	0.119985	0.146093	0.0520015	0.0523739	0.09238	0.0414188	0.0727761	0.047092	0.0989499			0.0750885	0.0874002	0.106026	0.0620576	0.0729393
AGO1	3.61301	3.5194	3.45623	3.21219	3.21912	3.1532	3.65641	2.91018	3.23844	3.90312	3.87668	3.82021	4.047	3.79391	3.6834			3.52955	3.19484	3.26834	3.86667	3.84144
AGO2	6.61483	6.47549	6.17382	7.3785	6.6564	6.50097	6.55216	4.63749	6.73614	6.92875	6.31164	6.14623	7.25497	6.77794	6.81755			6.42138	6.84529	5.97526	6.46221	6.95015
AGO3	3.2205	3.41487	3.60219	4.02167	3.17562	3.33415	2.8199	2.53058	3.07041	2.92987	2.34042	2.97366	3.33066	2.94874	3.37361			3.41252	3.51048	2.80696	2.74798	3.21767
AGO4	2.18335	1.99452	1.62087	2.28906	2.12976	1.90582	1.9263	1.74258	2.15639	1.71367	1.63275	1.72291	1.82247	1.86772	1.77395			1.93291	2.10821	1.94176	1.68978	1.82138
AGPAT1	45.5616	50.4215	45.8015	46.9113	46.564	48.774	47.2359	55.1173	42.0508	45.6778	45.4112	45.9337	45.2819	46.2807	47.2439			47.2615	47.4164	48.1347	45.6742	46.2688
AGPAT2	20.4016	22.0176	19.6399	23.2487	20.6759	22.4238	22.9775	23.6383	20.4996	21.1324	19.626	21.023	19.5565	19.7238	18.8823			20.6864	22.1161	22.3718	20.5938	19.3875
AGPAT3	22.1489	21.7232	22.4831	22.8295	22.463	21.401	21.7424	16.5323	21.7587	22.4271	22.0308	20.4055	20.3444	17.3939	17.7952			22.1184	22.2312	20.0111	21.6211	18.5112
AGPAT4	7.42009	6.64081	7.12474	7.67315	8.7043	8.43177	7.4102	8.27475	7.96303	7.06433	8.2365	8.08922	7.73301	8.17942	6.88495			7.06188	8.26974	7.88266	7.79668	7.59913
AGPAT5	24.0169	22.8339	23.3031	17.8889	18.8785	19.7188	23.6854	22.5275	23.0023	25.0878	24.105	24.4295	27.2145	27.2628	26.5731			23.3846	18.8287	23.0717	24.5408	27.0168
AGPAT6	33.2409	32.7243	31.551	33.1275	30.7327	30.5316	33.1252	27.135	32.8718	31.6882	32.2144	32.6818	33.6184	33.8038	33.9987			32.5054	31.4639	31.044	32.1948	33.807
AGPAT9	2.64326	2.49074	2.46963	3.21442	2.49023	2.3927	2.50836	3.68799	2.57833	2.11728	1.94399	2.53014	3.2394	4.09468	3.47585			2.53454	2.69912	2.92489	2.19714	3.60331
AGPS	19.4346	18.3072	20.5982	18.3698	17.7934	17.706	19.0609	15.9446	20.6361	20.5685	22.6	19.4896	20.1695	20.4317	18.3816			19.4467	17.9564	18.5472	20.886	19.6609
AGR2	0	0	0	0	0	0	0	0	0	0	0	0	0	0	0.0164966			0	0	0	0	0.00549887
AGR3	0.00761462	0.00653097	0.0110444	0.00916265	0.00753558	0.00252773	0.00753549	0.00345426	0.00614184	0.00854348	0.00725421	0.00440193	0.00786823	0.00476945	0.00747798			0.00839666	0.00640865	0.00571053	0.00673321	0.00670522
AGRN	32.5019	37.9363	29.9614	36.5828	34.7432	37.2301	36.9358	22.9271	28.2695	17.143	22.6683	19.0125	15.5564	17.8123	18.2999			33.4665	36.1854	29.3775	19.6079	17.2229
AGRP	0	0.0648668	0.0391913	0.132767	0.129552	0.0261616	0	0.325349	0	0.0661865	0	0	0.104034	0	0.387362			0.034686	0.0961602	0.10845	0.0220622	0.163799
AGT	0.562181	0.351796	0.387779	0.781128	0.674726	0.629793	1.20392	1.44605	1.22019	0.399779	0.47331	0.488337	0.236543	0.31113	0.464099			0.433919	0.695216	1.29005	0.453809	0.337257
AGTPBP1	2.42946	2.69114	2.50206	2.07999	2.12206	1.956	2.34783	2.39361	2.7943	2.92702	2.57869	3.15973	3.46401	2.96808	3.03942			2.54089	2.05268	2.51191	2.88848	3.15717
AGTR1	2.24174	1.92568	2.16598	2.33383	2.4262	2.21925	1.57901	1.8731	2.38266	3.03415	3.40544	2.86802	2.18572	2.71251	2.2474			2.11113	2.32643	1.94492	3.10254	2.38188
AGTR2	0	0	0	0	0	0	0	0	0	0	0	0	0	0	0			0	0	0	0	0
AGTRAP	42.6823	42.463	38.5271	40.488	44.9499	43.4527	49.5033	53.7895	42.5786	32.9496	34.1367	34.1403	33.34	34.09	38.4156			41.2241	42.9635	48.6238	33.7422	35.2819
AGXT	0	0	0	0	0	0	0.0382611	0	0.0311848	0	0	0	0	0	0			0	0	0.0231486	0	0
AGXT2	0.000657073	0.00154412	0.00496357	0.00167089	0.0273878	0.00130249	0.00479117	0.0017695	0.00296119	0.00205749	0.00327891	0.024457	0.000775952	0.00198333	0.000845013			0.00238825	0.0101204	0.00317395	0.00993113	0.00120143
AHCTF1	12.0781	11.3297	11.319	10.8115	10.7987	10.6734	11.5088	9.15509	11.9388	12.9618	12.5586	13.2718	12.5758	13.2687	12.3794			11.5756	10.7612	10.8676	12.9307	12.7413
AHCY	61.4172	62.2809	63.6925	58.3903	60.4384	62.1429	64.6337	66.6137	63.215	75.8095	72.5916	74.4336	69.2818	66.2655	69.154			62.4635	60.3239	64.8208	74.2782	68.2338
AHCYL1	34.5822	34.6742	35.3435	32.2004	31.0236	31.6299	36.8755	35.6292	34.8234	39.118	37.9895	40.1688	41.0502	39.6941	39.8159			34.8666	31.618	35.776	39.0921	40.1867
AHCYL2	2.50831	2.35653	2.40254	2.0654	2.08655	2.42051	2.66027	2.50419	2.48924	2.3944	2.26731	2.53558	2.96366	3.14209	3.32799			2.42246	2.19082	2.55123	2.3991	3.14458
AHDC1	4.52689	4.37877	4.78207	4.18074	4.36619	3.93468	5.06767	3.3818	4.58982	4.77783	4.90864	4.61373	5.72198	4.57178	4.75491			4.56258	4.16054	4.34643	4.76673	5.01622
AHI1	4.5315	4.86373	4.85113	4.93278	4.98392	4.81783	4.69369	3.74827	5.11539	5.05281	4.4261	4.88875	5.33519	5.43242	5.04417			4.74879	4.91151	4.51912	4.78922	5.27059
AHNAK	137.326	115.372	143.052	100.495	116.244	111.672	126.496	78.0801	136.109	144.226	144.023	149.097	131.811	135.645	133.636			131.917	109.47	113.562	145.782	133.697
AHNAK2	13.7844	12.2438	13.7308	9.38651	9.99649	10.0696	14.0666	7.51353	13.7207	11.0638	11.0052	11.1341	12.5464	12.7333	12.0998			13.253	9.81753	11.7669	11.0677	12.4598
AHR	18.2385	18.5094	17.9804	21.5949	20.1871	18.9831	16.7385	11.6605	15.6364	19.3773	18.4122	18.0272	15.6595	15.5306	15.4518			18.2428	20.255	14.6785	18.6056	15.5473
AHRR	9.49233	9.25758	8.65891	8.82589	8.14864	8.68531	9.27918	7.47131	8.55224	6.35283	6.6653	6.40058	8.40636	8.2199	7.72727			9.13627	8.55328	8.43424	6.4729	8.11784
AHSA1	109.386	112.688	119.249	105.82	110.411	114.591	116.17	145.248	116.025	115.645	107.009	120.777	120.952	121.768	126.563			113.774	110.274	125.814	114.477	123.094
AHSA2	10.5121	12.7674	9.66744	10.0235	11.3183	9.39642	8.893	14.791	9.22558	6.57982	7.84198	8.14496	10.6518	10.8729	11.1542			10.9823	10.2461	10.9699	7.52225	10.893
AHSG	0	0	0	0	0	0	0	0	0	0	0	0	0.00240348	0.0032052	0			0	0	0	0	0.00186956
AHSP	0.264779	0.112762	0	0	0	0	0	0.129306	0	0	0	0	0	0.10705	0.238356			0.125847	0	0.043102	0	0.115135
AICDA	0	0	0	0	0	0	0	0	0	0	0	0	0.00184015	0	0			0	0	0	0	0.000613383
AIDA	34.9505	37.5972	35.901	34.593	35.3692	34.4663	30.559	37.2263	34.5235	33.3899	31.35	34.0697	30.8631	33.3085	32.883			36.1496	34.8095	34.1029	32.9365	32.3515
AIF1	0	0	0	0.578019	0	0	0	0	0	0	0.22022	0	0	0	0			0	0.192673	0	0.0734067	0
AIF1L	0.0266614	0.0258044	0.0324142	0.0730354	0.0504679	0.0108168	0.0528548	0.069007	0.0525921	0.017552	0.0207461	0.0251221	0.362393	0.0408319	0.22988			0.0282933	0.0447734	0.0581513	0.0211401	0.211035
AIFM1	21.8658	22.4567	22.2268	22.6119	21.6042	23.8039	21.4318	26.3726	21.0571	21.5798	21.5371	24.1038	24.2223	25.0028	25.1506			22.1831	22.6733	22.9538	22.4069	24.7919
AIFM2	10.4542	11.4913	11.3604	11.4242	11.8439	10.4643	11.5209	11.8163	10.3712	11.3334	12.0743	12.6445	9.55053	10.4962	10.7469			11.102	11.2441	11.2361	12.0174	10.2645
AIFM3	0.155285	0.114463	0.0247141	0.157875	0.0736159	0.171173	0.158673	0.0933118	0.0985617	0.117497	0.158748	0.146875	0.193487	0.0531856	0.124546			0.098154	0.134221	0.116849	0.14104	0.12374
AIG1	20.8283	24.4949	22.5723	21.3184	23.2651	17.6802	19.2414	31.7459	31.8468	26.235	23.6435	32.579	30.2162	30.1004	29.3551			22.6318	20.7546	27.6114	27.4858	29.8906
AIM1	26.3555	24.1656	27.236	17.278	20.0942	19.2681	23.3415	20.3039	24.5017	23.2743	23.9803	22.5158	26.5621	24.9685	24.5386			25.919	18.8801	22.7157	23.2568	25.3564
AIM1L	0.000292041	0.00806937	0	0.0116984	0.0161459	0.0101543	0.00774961	0.00710505	0	0.0376687	0.0281328	0.0567368	0.0203916	0.00543177	0.021938			0.00278714	0.0126662	0.00495155	0.0408461	0.0159205
AIM2	1.97455	2.48604	1.69819	1.77598	2.45675	2.06968	2.61797	3.3288	2.1545	0.435069	1.16906	0.670957	0.559871	0.699936	0.590698			2.05293	2.1008	2.70042	0.758362	0.616835
AIMP1	39.4361	38.5838	40.8298	35.3409	37.7184	36.6269	39.0735	47.4693	39.7599	42.4777	40.8189	39.6403	40.5037	41.2838	42.958			39.6166	36.5621	42.1009	40.979	41.5818
AIMP2	27.401	29.6218	29.243	23.7973	25.1412	26.9109	28.7934	35.571	27.4715	30.9678	29.0381	31.2706	29.8285	28.4239	30.4556			28.7553	25.2831	30.612	30.4255	29.5693
AIP	22.0241	25.205	20.7323	23.4727	24.4587	27.6198	23.9545	29.221	26.582	19.9399	21.7996	22.816	24.3572	23.876	23.8915			22.6538	25.1837	26.5858	21.5185	24.0416
AIPL1	0.0738899	0.0105291	0	0	0.0210611	0.0437628	0	0.0120662	0	0	0	0	0.00749557	0.00984566	0.0433732			0.0281397	0.021608	0.00402207	0	0.0202381
AIRE	0.0196582	0.00223266	0.0126213	0.0200328	0.0212548	0.0028084	0.410433	0.216956	0.173374	0.0022781	0.0228662	0.022848	0.0184928	0	0.0253271			0.0115041	0.0146987	0.266921	0.0159974	0.0146066
AJAP1	10.428	10.0333	7.26403	8.10219	7.21581	8.47953	9.00547	7.17681	6.79314	7.5829	7.20654	6.69583	8.00047	8.24762	8.75638			9.24178	7.93251	7.65847	7.16176	8.33482
AJUBA	8.68597	7.61619	9.64755	6.1111	9.32706	6.15434	5.8607	7.64769	8.22327	5.69609	4.14095	7.05284	5.98289	7.44347	7.30801			8.6499	7.1975	7.24389	5.62996	6.91146
AK1	42.2643	41.8267	43.469	43.786	42.1036	39.865	47.1767	56.1528	47.1597	46.6885	43.746	44.1817	46.7718	44.2029	43.7241			42.52	41.9182	50.1631	44.8721	44.8996
AK2	72.4784	69.6107	71.1117	61.9702	67.8615	68.41	68.6845	81.4853	69.3023	73.6344	76.0345	78.5029	74.9146	75.6423	74.9586			71.0669	66.0806	73.1574	76.0573	75.1718
AK3	30.3725	31.999	30.4475	34.7013	29.0557	29.3842	30.0296	28.2622	32.6357	45.0553	39.2627	44.8116	33.0915	32.0808	34.915			30.9397	31.0471	30.3092	43.0432	33.3624
AK4	5.80655	6.42794	5.94683	6.95766	6.64681	6.45052	5.38285	5.63383	5.83401	8.74483	7.92737	8.75458	4.97104	5.57625	5.72766			6.06044	6.685	5.6169	8.47559	5.42498
AK5	48.4481	41.9618	51.526	35.367	37.5467	39.136	44.4337	50.9063	48.5217	46.314	42.7696	47.2087	52.9146	54.1186	53.4378			47.312	37.3499	47.9539	45.4308	53.4903
AK6	44.3666	39.5852	43.7507	42.3517	45.9371	45.416	40.5455	47.3116	40.2458	40.3128	39.0411	46.088	44.1419	47.1256	45.1173			42.5675	44.5683	42.701	41.814	45.4616
AK7	0.179572	0.201434	0.174194	0.232001	0.0884021	0.128052	0.133404	0.12851	0.138967	0.111287	0.0941213	0.0358889	0.122466	0.146774	0.182464			0.185067	0.149485	0.133627	0.0804324	0.150568
AK8	0.195118	0.132665	0.497087	0.395506	0.273004	0.163108	0.183438	0.405123	0.133626	0.205257	0.143407	0.307269	0.407843	0.282083	0.351854			0.274957	0.277206	0.240729	0.218644	0.34726
AK9	0.840814	1.02905	0.793779	1.04489	0.682715	1.08356	0.681564	0.680803	0.561892	0.742317	0.496624	0.528062	0.502905	0.674561	0.823961			0.887881	0.937055	0.64142	0.589001	0.667142
AKAP1	10.4905	10.1958	10.304	7.62707	8.78121	8.57733	10.164	9.52054	11.0545	10.5925	9.86212	10.3064	11.7097	11.5963	11.1559			10.3301	8.32854	10.2463	10.2537	11.4873
AKAP10	9.75573	9.83316	10.1276	9.72388	8.89772	9.40152	8.58703	7.30702	9.66486	9.69	9.0844	8.92148	9.89519	8.79144	8.52235			9.9055	9.34104	8.51964	9.23196	9.06966
AKAP11	7.14876	6.68104	6.75934	5.55245	5.65439	5.53955	7.01341	4.46174	7.8126	8.07985	8.11515	7.76817	8.14375	7.8849	7.47991			6.86305	5.58213	6.42925	7.98772	7.83619
AKAP12	43.566	39.4085	40.7134	48.3619	46.5159	45.7043	44.6667	26.836	42.0138	41.3222	37.7523	39.1659	41.2931	41.74	41.3103			41.2293	46.8607	37.8388	39.4135	41.4478
AKAP13	6.41323	5.60339	6.41173	6.09579	5.65785	5.76048	5.64552	4.37045	6.27664	5.91602	6.31451	5.98244	6.71838	6.78012	5.76066			6.14278	5.83804	5.43087	6.07099	6.41972
AKAP14	0.00171736	0.00221574	0.000695873	0	0.000369282	0	0.00138479	0.00126958	0.14386	0	0	0	0	0	0.0661985			0.00154299	0.000123094	0.0488381	0	0.0220662
AKAP17A	6.23423	6.55076	6.00977	8.83186	7.16573	7.67212	6.60652	5.51619	5.68096	5.09008	5.45629	5.25048	5.71171	5.38923	5.54803			6.26492	7.8899	5.93456	5.26562	5.54966
AKAP2	88.3897	90.3484	85.2159	78.4333	82.1304	78.8917	83.1414	68.0348	85.6173	94.0271	88.0839	94.2941	83.3006	86.0142	84.5386			87.9847	79.8185	78.9312	92.135	84.6178
AKAP3	0.323478	0.393815	0.287898	0.545252	0.480648	0.481204	0.421678	0.214501	0.447973	0.261457	0.255811	0.214029	0.322043	0.429445	0.31748			0.335064	0.502368	0.361384	0.243766	0.356323
AKAP4	0.00279817	0.00270765	0	0	0.0233027	0	0	0	0	0	0	0	0	0	0.00251896			0.00183527	0.00776757	0	0	0.000839653
AKAP5	0.00677668	8.19636e-39	0.0295714	4.10559e-05	2.95359e-114	0.0097126	4.88284e-07	0.00747106	1.50961e-130	0.120255	1.62186e-124	1.42622e-32	0.00177188	2.73038e-34	0.0943704			0.012116	0.00325122	0.00249052	0.040085	0.0320474
AKAP6	0.0979376	0.124455	0.137649	0.0306152	0.0407605	0.036439	0.111648	0.0635119	0.0761599	0.126209	0.0946477	0.0781763	0.117072	0.0981457	0.199447			0.120014	0.0359382	0.0837733	0.0996777	0.138222
AKAP7	5.36168	3.32613	4.54008	4.93772	3.2658	3.87823	3.68251	2.50272	3.99304	3.33598	4.21498	4.22668	3.66944	3.57952	2.6815			4.4093	4.02725	3.39276	3.92588	3.31015
AKAP8	11.114	11.6864	12.0106	11.5277	12.1875	11.9015	11.474	9.87781	10.0399	13.0892	11.7579	11.4495	13.0123	12.8182	12.9353			11.6037	11.8722	10.4639	12.0989	12.9219
AKAP8L	26.372	27.8382	25.6847	33.1827	30.2392	29.6751	23.6247	22.4091	23.1688	19.2569	19.9457	19.7687	22.0185	22.2979	21.3477			26.6316	31.0323	23.0675	19.6571	21.888
AKAP9	3.42346	3.05505	3.62733	3.2879	3.09071	3.16212	3.21898	2.26035	3.60429	3.84057	3.38565	3.62026	3.35963	3.57788	3.53274			3.36861	3.18024	3.02787	3.61549	3.49008
AKIP1	17.3534	16.2615	15.1637	15.5811	15.6982	17.2309	19.6805	20.7168	18.6873	21.009	21.5135	19.8192	21.187	22.0651	20.0757			16.2595	16.1701	19.6949	20.7806	21.1093
AKIRIN1	40.4503	46.8187	40.4222	45.5276	43.5975	40.2003	39.2148	38.2277	39.9055	42.946	35.6826	37.6496	43.4991	39.9013	37.7319			42.5637	43.1085	39.116	38.7594	40.3774
AKIRIN2	24.5637	24.0197	21.0444	29.222	25.2161	25.7062	19.0896	22.9669	19.4493	17.5829	18.1659	19.6968	18.0939	18.8334	19.4493			23.2093	26.7148	20.5019	18.4819	18.7922
AKNA	2.18134	2.44288	2.07436	2.97514	2.50301	2.47349	2.35417	1.68971	2.13666	1.92553	1.96408	1.69884	1.41947	1.47076	1.72321			2.23286	2.65055	2.06018	1.86282	1.53781
AKNAD1	0.0903014	0.0997537	0.0599731	0.0699319	0.0541547	0.0396978	0.0526204	0.0593058	0.0318888	0.0840315	0.113152	0.0227011	0.246729	0.270646	0.194571			0.0833427	0.0545948	0.0479383	0.0732949	0.237315
AKR1A1	37.828	36.7136	34.4038	33.3333	36.4566	36.4705	40.1008	40.6604	36.7775	42.1606	41.8604	42.5743	38.6465	39.1378	37.4616			36.3151	35.4201	39.1796	42.1984	38.4153
AKR1B1	146.989	144.053	144.985	160.574	165.425	168.016	155.244	186.978	148.336	141.257	136.572	153.387	128.417	139.664	130.938			145.342	164.672	163.519	143.739	133.006
AKR1B10	0.0222406	0.0898876	0	0.207606	0.109379	0.16333	0.164592	0.100618	0	0.198578	0.142025	0.213861	0.0644896	0.041089	0.157045			0.0373761	0.160105	0.0884033	0.184821	0.0875412
AKR1B15	0	0.0554918	0.0822944	0.00767572	0.0595645	0.00102347	0.00305109	0	0.0289067	0.0445926	0.0943052	0.0565273	0.0250804	0.00619197	0			0.0459287	0.0227546	0.0106526	0.0651417	0.0104241
AKR1C1	180.992	165.583	187.441	109.407	129.849	128.183	195.686	234.713	215.769	142.564	157.751	162.346	184.044	188.879	181.313			178.005	122.48	215.389	154.22	184.745
AKR1C2	28.9313	27.8959	31.8014	18.9161	22.1179	20.9108	34.5465	43.5931	36.6484	33.9643	37.5025	39.7165	31.8488	33.3872	31.5857			29.5429	20.6483	38.2627	37.0611	32.2739
AKR1C3	10.7672	9.31322	12.2254	7.1906	8.33079	7.32712	10.3881	13.0404	12.6992	27.7064	28.4838	26.5106	11.962	10.4532	10.9444			10.7686	7.61617	12.0426	27.5669	11.1199
AKR1C4	0.966911	0.770017	1.09778	0.571858	0.647082	0.486515	0.968486	1.15244	0.851512	1.09814	1.03785	1.27313	1.00822	1.13648	0.747247			0.944903	0.568485	0.990813	1.13637	0.963982
AKR1D1	0.0117916	0.0407489	0	0.0393262	0.0114095	0	0	0.000747662	0	0.000665714	0.000785074	0	0	0	0			0.0175135	0.0169119	0.000249221	0.000483596	0
AKR1E2	1.81899	1.65832	1.64409	1.647	1.35616	1.36989	1.52193	1.73346	1.48302	1.49839	1.33056	1.38175	1.40937	2.11997	2.47463			1.70713	1.45768	1.57947	1.40357	2.00132
AKR7A2	31.4354	33.8342	32.972	28.7876	29.8524	32.3705	34.1761	37.1036	33.8365	34.5753	34.4779	33.8687	34.4908	33.2543	33.2851			32.7472	30.3368	35.0387	34.3073	33.6767
AKR7A3	0.717319	0.827199	1.13389	0.466495	1.08317	0.591426	0.623629	0.773085	0.621644	0.68737	0.639015	0.714223	0.797187	1.0337	0.643915			0.892803	0.713697	0.672786	0.680203	0.824934
AKT1	75.0697	76.9699	76.7679	77.9723	76.3689	77.6567	81.5881	78.121	72.6895	72.3505	73.2789	69.202	78.1547	73.5548	74.4649			76.2692	77.3326	77.4662	71.6105	75.3915
AKT1S1	42.4149	42.9449	39.5225	44.5686	42.6619	47.1009	44.1906	49.8678	39.4181	40.5943	43.3472	41.7287	42.7451	39.9628	39.8768			41.6274	44.7771	44.4922	41.8901	40.8616
AKT2	45.0319	43.7991	42.0224	36.7731	40.4681	42.3802	46.4599	32.9064	41.4418	44.319	44.3289	41.0767	45.2884	43.3126	44.4991			43.6178	39.8738	40.2694	43.2415	44.3667
AKT3	13.3501	10.4174	14.0914	11.9878	11.9054	10.6021	12.5677	9.33901	13.2689	14.8945	11.6286	13.8127	12.2838	11.7411	12.6526			12.6196	11.4984	11.7252	13.4453	12.2258
AKTIP	3.82213	4.40852	4.08735	3.53482	3.47108	3.44664	3.35096	4.08641	3.87729	4.60423	4.54195	4.15717	4.60293	4.4395	4.62954			4.106	3.48418	3.77155	4.43445	4.55732
ALAD	9.7028	9.42223	10.2396	7.94535	9.4181	8.20124	10.9918	10.2267	11.0903	12.9571	12.5304	13.0787	11.7042	11.4425	11.4882			9.78821	8.52156	10.7696	12.8554	11.545
ALAS1	31.4623	31.7962	29.6049	33.7487	33.4927	35.4965	33.8439	33.5754	35.0767	31.8175	32.0291	35.7327	29.1249	31.3851	34.3726			30.9545	34.246	34.1653	33.1931	31.6275
ALAS2	0.0203465	0.0124679	0.00704815	0.0178281	0.00997408	0.0219561	0.00467529	0.00571508	0.00889144	0.00636082	0.00750129	0.0188568	0.00887589	0.0367389	0.00347971			0.0132875	0.0165861	0.00642727	0.0109063	0.0163648
ALB	0.207144	0.250502	0.0946238	0.17556	0.186587	0.23182	0.0627672	0.0305284	0.0852651	0.0170788	0	0.0341533	0.0212469	0.0491955	0.0371734			0.18409	0.197989	0.0595202	0.0170774	0.0358719
ALCAM	66.953	64.2277	64.6834	89.4439	72.1481	64.8238	67.4953	42.0995	67.516	83.3142	72.6746	75.9956	71.3142	75.8888	70.4494			65.288	75.4719	59.0369	77.3281	72.5508
ALDH16A1	5.53112	5.34807	5.2766	4.73046	5.38284	5.85256	5.68471	5.05237	4.95744	5.45644	6.37522	4.67079	6.19005	5.40211	5.52068			5.38526	5.32195	5.23151	5.50082	5.70428
ALDH18A1	36.4406	37.0154	37.5096	34.1555	36.9083	37.2812	36.7666	35.2209	35.0654	43.5831	41.1778	42.5408	40.5611	40.1494	39.2406			36.9885	36.115	35.6843	42.4339	39.9837
ALDH1A1	0	0	0	0.0394518	0.0627836	0	0	0	0	0.151118	0.105911	0.102459	0	0	0.023386			0	0.0340785	0	0.119829	0.00779533
ALDH1A2	1.92339	1.06579	1.06718	0.538867	0.770682	0.672813	1.78403	1.84903	1.80584	1.02222	1.47471	1.00271	1.42569	1.27139	1.46006			1.35212	0.660787	1.81297	1.16655	1.38571
ALDH1A3	1.91992	2.22912	1.60125	2.63614	2.53513	2.08581	2.03742	2.05354	2.51949	45.8366	42.6047	47.7258	2.26002	2.12597	2.45098			1.91676	2.41903	2.20348	45.389	2.27899
ALDH1B1	26.6378	27.4177	27.8302	22.1988	24.3363	24.0432	28.6779	27.4879	27.6718	33.8281	33.1513	33.9253	28.6825	30.1569	31.5845			27.2952	23.5261	27.9459	33.6349	30.1413
ALDH1L1	0	0.000349601	0	0.0217426	0.0237053	0	0	0	0.000356168	0	0	0	0.00879554	0.000995698	0.000325239			0.000116534	0.0151493	0.000118723	0	0.00337216
ALDH1L2	15.6152	16.7035	15.5578	15.3135	14.9799	14.0171	15.4644	13.0912	15.374	16.581	15.378	15.2663	15.1925	15.0736	14.7518			15.9588	14.7702	14.6432	15.7418	15.006
ALDH2	9.5149	10.2783	8.90241	11.7332	11.196	12.5072	10.3445	11.6858	10.361	16.6165	16.4397	16.6258	8.91221	9.46977	8.94424			9.5652	11.8121	10.7971	16.5607	9.10874
ALDH3A1	0.0923905	0.054114	0	0.0958998	0.0870283	0.0887342	0.163242	0.1212	0.107332	0.0479864	0.0489288	0.0639572	0.103262	0.124156	0.111816			0.0488348	0.0905541	0.130591	0.0536241	0.113078
ALDH3A2	11.3701	11.8696	11.6499	9.28756	9.11644	8.09245	11.4576	10.8469	13.0885	12.1639	12.7576	13.0594	13.5258	12.5638	12.352			11.6299	8.83215	11.7977	12.6603	12.8139
ALDH3B1	21.1367	21.4587	20.9597	19.0842	19.3826	20.285	23.8808	22.5599	20.1775	21.6019	21.2893	20.9594	22.0355	22.0969	20.2378			21.185	19.5839	22.2061	21.2835	21.4567
ALDH3B2	0	0	0	0	0	0	0	0	0	0	0	0	0	0	0.0119558			0	0	0	0	0.00398527
ALDH4A1	4.00688	3.21146	3.25137	2.58527	2.94145	3.1505	3.37784	3.59302	3.512	3.48716	3.57283	3.17008	3.80859	3.4472	3.19034			3.4899	2.89241	3.49429	3.41002	3.48204
ALDH5A1	0.242227	0.135475	0.18036	0.258376	0.38768	0.196787	0.218233	0.200213	0.208059	0.498724	0.53816	0.38314	0.249641	0.313254	0.255808			0.186021	0.280948	0.208835	0.473341	0.272901
ALDH6A1	2.71096	2.51613	3.24266	2.8381	2.93607	2.22781	2.84988	2.99277	3.19907	3.62611	4.28433	4.75476	3.03805	3.15078	2.75902			2.82325	2.66733	3.01391	4.22173	2.98262
ALDH7A1	17.3901	15.968	17.4554	10.912	14.0386	13.1265	16.3322	17.0719	18.2549	19.8932	18.7627	18.4735	18.4489	17.1105	17.818			16.9378	12.6924	17.2197	19.0431	17.7925
ALDH8A1	0.198286	0.246632	0.191663	0.274313	0.256283	0.188511	0.111962	0.209144	0.198362	0.133163	0.190092	0.170959	0.277142	0.152703	0.153244			0.212194	0.239702	0.173156	0.164738	0.194363
ALDH9A1	30.1145	31.0658	28.7804	27.9067	29.5734	28.7868	31.4131	32.2833	31.5469	36.0727	35.8886	37.5232	32.2052	32.7678	35.1948			29.9869	28.7556	31.7478	36.4948	33.3893
ALDOA	650.626	686.037	638.993	668.572	695.558	726.642	728.971	785.772	670.241	753.598	757.796	806.741	645.397	651.628	662.439			658.552	696.924	728.328	772.712	653.155
ALDOB	0.00748418	0.0127296	0.0230417	0.0136664	0.0181048	0.00683218	0.0151631	0.0138551	0.0147595	0.0375181	0.0147866	0.0238922	0.0261297	0.0466704	0.0224349			0.0144185	0.0128678	0.0145926	0.025399	0.031745
ALDOC	11.0955	11.9592	10.8237	11.2232	11.3287	11.5475	13.1459	15.6261	12.318	14.3917	14.24	13.635	10.7149	11.5421	11.5799			11.2928	11.3665	13.6967	14.0889	11.279
ALG1	20.7229	20.4213	23.0887	18.1588	18.198	18.5533	20.851	22.6837	20.2729	22.8107	23.3224	22.0169	24.1994	22.6706	21.5433			21.411	18.3034	21.2692	22.7167	22.8044
ALG10	1.76104	1.47855	1.13337	0.769776	1.44905	1.47255	1.16969	1.32069	1.32304	1.61567	0.983656	1.55986	1.96803	1.27962	1.73603			1.45765	1.23046	1.27114	1.3864	1.66123
ALG10B	0.734987	0.696908	0.845314	1.22949	1.45592	0.583303	0.75859	0.498804	1.33124	1.53252	1.3973	0.708131	1.20647	0.63341	1.42199			0.75907	1.08957	0.862878	1.21265	1.08729
ALG11	6.54925	5.74736	5.74384	6.61456	5.91775	6.32774	5.72758	3.69029	5.93521	6.56517	6.19684	6.67184	6.90346	7.12858	6.35245			6.01348	6.28668	5.11769	6.47795	6.79483
ALG12	8.28236	9.31481	8.79439	8.56208	8.52762	9.40116	9.55477	8.56233	7.89767	8.51926	8.37073	8.74066	8.61123	7.90274	8.75905			8.79719	8.83029	8.67159	8.54355	8.42434
ALG13	15.6776	15.2326	17.142	12.9319	15.3735	15.5481	13.8464	16.3495	13.4872	13.4679	14.2951	15.4221	15.1759	15.7375	15.9042			16.0174	14.6178	14.561	14.395	15.6059
ALG14	9.69951	9.9235	8.41051	6.47396	7.17687	8.72677	9.37981	10.4105	9.51498	11.9839	11.5744	8.69682	9.7009	9.47888	10.3663			9.34451	7.4592	9.76843	10.7517	9.84869
ALG1L	0.910074	0.668747	0.641757	0.569591	0.477678	0.537981	0.691292	0.979874	0.76997	0.795702	0.848003	0.89643	0.840754	1.03872	1.01247			0.740193	0.528417	0.813712	0.846712	0.963981
ALG1L2	0.0948945	0.05708	0.0997047	0.0717962	0.0623179	0.0447456	0.105471	0.0720491	0.183909	0.0852526	0.0970551	0.0893983	0.0985495	0.115585	0.0946604			0.0838931	0.0596199	0.120476	0.0905687	0.102932
ALG2	23.5952	26.248	23.5682	25.5101	24.9668	23.9743	22.1734	23.6843	21.897	21.0761	22.6459	23.3536	23.8165	23.7622	24.7821			24.4705	24.8171	22.5849	22.3585	24.1203
ALG3	40.1833	46.1815	42.8772	38.4857	43.4508	43.3636	48.0805	49.8349	39.567	42.291	41.9596	47.3001	43.3366	44.7306	45.088			43.0807	41.7667	45.8275	43.8502	44.3851
ALG5	23.9454	23.7141	26.8452	22.4082	22.2229	20.8616	25.1694	28.2999	22.4949	26.7248	23.2435	23.6431	25.6212	25.9779	24.2593			24.8349	21.8309	25.3214	24.5371	25.2861
ALG6	4.52271	4.61515	4.13367	2.85702	3.00737	3.08349	3.60627	4.64325	4.84447	4.99786	4.53996	4.76069	6.10858	6.36992	6.24429			4.42384	2.98263	4.36466	4.76617	6.24093
ALG8	29.8132	31.9087	31.1609	23.9005	27.0972	26.8854	27.6993	38.638	32.0989	34.198	33.8692	36.1923	33.3031	35.0292	33.3556			30.9609	25.961	32.8121	34.7532	33.896
ALG9	10.1275	9.52645	9.50462	8.37653	8.95328	9.19339	9.70779	10.5567	9.46786	11.5329	10.0268	10.9678	10.793	10.3207	10.9131			9.71952	8.84107	9.91078	10.8425	10.6756
ALK	0.000616912	0.00583618	0.000580013	0.000633539	0.000447707	0.000328515	0.000699532	0.00668757	0.000225183	0.00041876	0.000419017	0.00567719	0.000750343	0.0427525	0.00418224			0.00234437	0.00046992	0.00253743	0.00217166	0.015895
ALKBH1	7.09221	7.66084	7.25142	7.46918	7.68215	7.34973	7.18566	6.96489	7.37017	7.58308	6.39239	6.6036	7.48546	6.76409	7.18573			7.33482	7.50035	7.17357	6.85969	7.14509
ALKBH2	13.0087	12.1951	12.1695	9.40414	10.2541	11.7286	14.6395	15.1207	14.0806	13.2319	12.3118	12.8454	15.0015	16.1959	13.8617			12.4578	10.4623	14.6136	12.7964	15.0197
ALKBH3	10.0526	11.2605	10.1182	10.7625	10.4665	10.2717	11.1154	12.1125	10.5324	11.1131	10.7652	10.8742	10.0059	11.7021	11.8271			10.4771	10.5002	11.2534	10.9175	11.1784
ALKBH4	4.5478	4.15752	3.8556	3.4008	3.70142	4.72784	4.24009	4.71199	3.7712	4.84971	5.28791	4.65373	3.91509	3.51286	5.31494			4.18697	3.94335	4.24109	4.93045	4.24763
ALKBH5	20.406	20.8119	21.1239	20.1992	21.623	21.8467	23.2106	24.3514	20.5229	21.1516	23.1182	22.4114	23.6159	22.208	22.4659			20.7806	21.223	22.695	22.2271	22.7633
ALKBH6	10.6142	10.1489	11.596	8.00214	11.1206	12.5901	12.2683	13.1205	9.6571	13.5546	13.0481	13.5615	12.6716	11.1352	14.3412			10.7864	10.5709	11.682	13.3881	12.716
ALKBH7	16.7278	19.5809	15.3472	17.2892	18.5935	21.1816	16.8046	22.561	16.337	24.1932	25.3588	25.2678	20.5312	20.353	18.5638			17.2186	19.0214	18.5675	24.9399	19.816
ALKBH8	4.27445	3.89341	4.8137	3.82155	5.13923	3.88724	3.69515	3.77094	4.51837	4.7302	3.67716	3.99835	4.32335	4.24862	4.00933			4.32719	4.28267	3.99482	4.13524	4.19377
ALLC	0.11462	0.400746	0.0450494	0.329741	0.244518	0.091657	0.000767356	0.0562351	0.0560812	0	0	0	0.00087408	0.0528416	0.0436261			0.186805	0.221972	0.0376946	0	0.0324473
ALMS1	1.52226	1.40358	1.75142	1.56146	1.47406	1.4503	1.52995	0.953761	1.60528	1.83332	1.80439	1.86148	1.70484	1.86703	1.78584			1.55909	1.49527	1.363	1.83306	1.7859
ALOX12	0.265495	0.267365	0.338568	0.325536	0.285963	0.262816	0.295889	0.263579	0.272152	0.149593	0.260375	0.239242	0.333492	0.198281	0.236164			0.290476	0.291438	0.277207	0.216403	0.255979
ALOX12B	0.0242367	0.0036583	0.00344677	0.0112644	0	0	0	0.0135278	0.00186351	0.00373277	0.00220102	0.0157094	0.0156261	0.0111198	0.00850843			0.0104473	0.0037548	0.00513044	0.0072144	0.0117514
ALOX15	0.00266518	0.00257896	0	0	0.0161051	0.006488	0	0.020428	0	0.00526291	0.00620652	0.0106802	0.0126895	0.0169221	0			0.00174805	0.00753103	0.00680933	0.00738321	0.00987053
ALOX15B	0.893246	1.21823	0.917	1.40447	1.26708	1.41958	0.89728	0.746065	0.78466	1.00254	0.958303	0.923589	0.59431	0.794149	0.801579			1.00949	1.36371	0.809335	0.961477	0.730013
ALOX5	0.000326339	0.0168094	0.000892565	0.00107243	0.00280408	0.0223368	0.00126308	0.000651369	0.0180367	9.66627e-05	0.000455976	0.00110676	0.000539532	0.001439	0.000881327			0.00600943	0.00873777	0.00665038	0.000553133	0.000953286
ALOX5AP	0.175032	0.169368	0	0.779481	0.556045	0.489428	0	0.0486013	0.000545781	0.173114	0	0.165936	0	0	0.197246			0.1148	0.608318	0.0163824	0.113017	0.0657487
ALOXE3	0.610977	0.578601	0.390342	0.779177	0.682974	0.46129	0.546619	0.651583	0.462421	0.258252	0.228944	0.256538	0.205952	0.32961	0.221216			0.52664	0.641147	0.553541	0.247911	0.252259
ALPI	0	0	0	0	0	0	0	0	0.0180539	0	0	0	0	0	0.00824299			0	0	0.00601797	0	0.00274766
ALPK1	1.89929	2.0308	2.05038	1.78205	1.67796	1.78274	1.78244	1.59443	2.01967	1.61116	1.94091	1.7859	1.61546	1.81653	1.88599			1.99349	1.74758	1.79885	1.77932	1.77266
ALPK2	2.33096	2.09251	2.00769	3.1509	2.66848	2.65986	1.67391	1.18526	1.50498	1.96787	1.63953	1.91979	1.89123	2.16286	1.88976			2.14372	2.82641	1.45472	1.8424	1.98128
ALPK3	0.0871783	0.0560004	0.043043	0.0983334	0.063496	0.0356516	0.101664	0.0788967	0.0960829	0.017492	0.0276463	0.0569606	0.0562167	0.0458671	0.0544501			0.0620739	0.065827	0.0922145	0.034033	0.052178
ALPL	0.229667	0.194975	0.154237	0.230136	0.149083	0.236681	0.113945	0.462689	0.205228	0.139817	0.1711	0.232949	0.272337	0.174796	0.1564			0.19296	0.2053	0.260621	0.181289	0.201178
ALPP	0.0100185	0	0	0.037239	0	0	0.0484708	0	0.0200323	0	0	0	0.0139981	0.0184072	0.0360757			0.0033395	0.012413	0.0228344	0	0.022827
ALPPL2	0.0100831	0	0	0	0	0	0	0	0.0121042	0	0	0	0.00845809	0	0.0110531			0.00336103	0	0.00403473	0	0.00650373
ALS2	8.80597	9.19164	7.95328	7.65935	8.10313	8.37392	8.63163	8.14149	9.01741	9.00033	8.40349	8.58172	9.28695	9.24505	8.9991			8.6503	8.04547	8.59684	8.66185	9.17703
ALS2CL	1.33546	1.33508	1.26372	0.957627	1.35748	1.41372	1.78472	1.39116	1.55155	0.923635	0.941194	1.39244	1.16927	1.02172	1.0852			1.31142	1.24294	1.57581	1.08576	1.09206
ALS2CR11	0.705877	0.691691	0.397809	0.334223	0.369801	0.377583	0.613892	0.502821	0.615143	0.639113	0.831227	0.605712	0.742404	0.67572	0.724955			0.598459	0.360536	0.577285	0.692017	0.71436
ALS2CR12	0.237468	0.25046	0.139651	0.378675	0.482294	0.276513	0.173943	0.126688	0.394759	0.0575479	0.14863	0.100535	0.176539	0.186261	0.332143			0.209193	0.379161	0.231797	0.102238	0.231648
ALX1	1.27944	1.39588	1.25845	1.67735	0.671813	1.27216	0.844364	1.54084	0.790402	0.837107	0.691234	0.676663	0.770154	0.802772	0.764305			1.31126	1.20711	1.05854	0.735001	0.779077
ALX3	0.708144	0.889673	0.477073	0.578494	0.720028	0.798237	0.753811	0.751902	0.741761	0.742096	0.565692	0.584393	0.877059	0.729502	0.697059			0.69163	0.69892	0.749158	0.630727	0.767873
ALX4	0.00577468	0.00603721	0.030465	0.0166368	0.0157787	0.0110917	0.020205	0.0432427	0.0603761	0.00616292	0.00558439	0.00542187	0.0312873	0.0152308	0.0490426			0.0140923	0.0145024	0.0412746	0.00572306	0.0318536
ALYREF	54.0314	57.6474	54.3491	50.8406	57.0587	54.2997	55.2944	65.2804	56.1667	58.7122	56.8259	58.0635	61.5952	57.1393	59.6375			55.3426	54.0663	58.9138	57.8672	59.4573
AMACR	2.55236	3.67067	3.53833	3.25076	2.2745	2.26064	3.20531	3.31836	3.84801	2.97478	3.39996	2.9696	3.85831	3.60996	3.24626			3.25379	2.5953	3.45723	3.11478	3.57151
AMBN	0	0	0	0	0	0	0	0.00420276	0	0	0	0	0.0170048	0	0			0	0	0.00140092	0	0.00566827
AMBP	0.0705101	0.00149862	0	0	0.0442715	0	0.0435781	0.0365246	0.0992795	0.00305824	0.0532738	0.0945321	0.0326577	0.0302528	0.032434			0.0240029	0.0147572	0.0597941	0.050288	0.0317815
AMBRA1	8.79345	8.81073	8.70734	10.4707	9.45231	9.90114	8.84891	6.75538	8.21918	6.93791	6.82301	7.06093	7.71341	8.03365	8.06534			8.77051	9.94138	7.94116	6.94062	7.93747
AMD1	66.4297	64.7007	73.5454	59.8168	60.3576	61.5583	65.1959	65.1597	69.9167	74.6617	66.3092	78.0773	80.4386	76.7244	77.0177			68.2253	60.5776	66.7574	73.0161	78.0602
AMDHD1	0.20611	0.0867053	0.383509	0.350321	0.183587	0.446638	0.160942	0.0160408	0.0433342	0.0732842	0.00173808	0.0274252	0.199981	0.0741016	0.0753858			0.225441	0.326849	0.073439	0.0341492	0.116489
AMDHD2	7.7265	7.89521	5.98509	7.31096	7.27864	6.87609	7.72226	6.96801	5.64189	6.08558	6.58208	7.03463	7.72779	6.38616	7.06208			7.20227	7.15523	6.77739	6.56743	7.05868
AMELX	0.000776023	0	0	0.0940646	0.050529	0.0923997	0.0436157	0	0.00139464	0	0	0	0.00257574	0.0483786	0			0.000258674	0.0789978	0.0150034	0	0.0169848
AMELY	0.00214625	0.000593377	0.00111813	0.000839657	0.000593364	0.00223918	0.000741696	0.000339992	0.000302262	0.00181636	0.00071401	0.00144423	0.0016193	0.00281666	0.000276013			0.00128592	0.00122407	0.000461317	0.00132487	0.00157066
AMER1	1.16987	1.16502	0.939069	1.22358	1.13859	1.04615	1.0932	0.756418	1.15329	1.09792	1.15167	1.02506	0.965693	0.993269	1.03168			1.09132	1.13611	1.00097	1.09155	0.996881
AMER2	0	0	0	0.00526897	0	0	0	0	0	0	0	0	0.0039762	0	0			0	0.00175632	0	0	0.0013254
AMER3	0	0	0	0	0	0	0	0	0	0	0	0	0	0	0			0	0	0	0	0
AMFR	27.5819	29.7657	29.7602	28.9598	27.5006	30.1979	28.2178	25.6844	27.307	27.4954	25.4156	27.756	29.6639	30.2431	28.9816			29.0359	28.8861	27.0697	26.889	29.6295
AMH	0.351917	0.346225	0.223201	0.232795	0.265953	0.235908	0.423933	0.26018	0.311743	0.312224	0.320694	0.211418	0.803234	0.637229	0.678889			0.307114	0.244885	0.331952	0.281445	0.706451
AMHR2	0.0329315	0	0	0.0601232	0.0393345	0	0.0136392	0.0041682	0.0111167	0.00371127	0.0265696	0.0035411	0.0295684	0.0893424	0.0205395			0.0109772	0.0331526	0.00964137	0.011274	0.0464834
AMICA1	0.00180308	0	0	0	0	0.00109734	0	0	0	0	0	0	0	0	0			0.000601027	0.00036578	0	0	0
AMIGO1	0.746452	0.636871	0.691102	0.868339	0.649462	0.772759	0.984241	0.554129	0.585665	0.650717	0.82223	0.681161	0.72636	0.588791	0.732032			0.691475	0.76352	0.708012	0.718036	0.682394
AMIGO2	0.0818597	0.159897	0.0703654	0.544187	0.478696	0.325375	0.0249288	0.0109231	0.0609084	0.0348076	0.0344081	0.135916	0.524025	0.700828	0.53658			0.104041	0.449419	0.0322534	0.0683772	0.587144
AMIGO3	0.771283	0.751694	0.729115	0.903063	0.553638	0.507181	0.826099	0.69615	0.871491	0.616894	0.815597	0.658344	0.937957	0.779965	0.881101			0.750697	0.654627	0.797913	0.696945	0.866341
AMMECR1	4.7696	4.6755	4.74124	4.29022	4.38648	4.00667	3.96974	4.07603	4.66269	5.13819	4.78317	5.15078	5.18622	4.79225	4.91792			4.72878	4.22779	4.23615	5.02405	4.96546
AMMECR1L	11.6345	12.6798	11.2093	14.3462	12.0115	12.0064	12.1991	10.0163	11.3513	10.6026	11.6129	11.8012	10.1008	10.7706	12.3913			11.8412	12.788	11.1889	11.3389	11.0876
AMN	0.0312383	0.0699377	0.0641856	0.0190761	0.0388417	0.0586501	0.0503913	0.0502508	0.0752779	0.0445509	0.0474362	0.0261588	0.0597753	0.0414514	0.0461121			0.0551205	0.038856	0.05864	0.039382	0.0491129
AMN1	3.08028	2.6323	1.97305	2.90675	3.20304	3.11123	2.62822	3.94223	2.11819	2.92201	3.70929	3.09048	3.34493	3.06107	3.01977			2.56188	3.07367	2.89621	3.24059	3.14192
AMOT	0.211058	0.204612	0.130562	0.1716	0.172619	0.1477	0.227465	0.171886	0.229968	0.184868	0.175485	0.170121	0.245901	0.33153	0.342586			0.182077	0.163973	0.209773	0.176825	0.306672
AMOTL1	14.3329	12.8593	12.3069	13.1294	13.5684	12.2195	15.8031	10.6418	13.7034	14.4298	13.3187	12.9276	15.4139	15.0229	14.5299			13.1664	12.9724	13.3828	13.5587	14.9889
AMOTL2	34.6991	35.8221	32.1203	39.3417	36.9738	37.3917	35.8853	28.1076	29.9324	34.2768	33.1857	35.7046	29.1335	27.452	31.0238			34.2138	37.9024	31.3084	34.389	29.2031
AMPD1	0.0289295	0.0188648	0.00459117	0.04913	0.0279938	0.0206624	0.00609097	0.0766366	0.025826	0.0128714	0.00439771	0.00237207	0.034529	0.0894728	0.061339			0.0174618	0.0325954	0.0361845	0.00654706	0.0617803
AMPD2	26.1512	26.5764	24.6502	25.7281	25.8788	24.7918	29.5717	26.6694	25.73	25.575	27.4765	26.4368	28.5424	26.171	28.1671			25.7926	25.4662	27.3237	26.4961	27.6268
AMPD3	7.35994	7.50923	7.55116	7.71055	7.59284	7.61743	7.84278	7.40939	7.62721	8.44268	7.74707	8.14489	8.32843	9.17007	9.11585			7.47344	7.64027	7.62646	8.11155	8.87145
AMPH	0.558061	0.331699	0.441889	0.445792	0.415885	0.722961	0.36571	0.34252	0.314235	0.229757	0.232607	0.183684	0.250271	0.222053	0.291317			0.443883	0.528213	0.340822	0.215349	0.254547
AMT	1.00225	0.820547	0.516935	0.718376	0.454607	0.665952	0.962284	0.793644	0.582543	0.589306	0.686191	0.640404	0.741341	0.629659	0.743281			0.779911	0.612978	0.77949	0.638634	0.70476
AMTN	0	0	0	0	0	0	0	0	0	0	0	0	0	0	0			0	0	0	0	0
AMY1A	0.0200649	0.0773251	0.0449306	0.0660904	0.0362768	0.0449898	0.0134981	0.0780811	0.0364384	0.0257197	0.0584091	0.0106116	0.0218247	0.0190793	0.011883			0.0474402	0.049119	0.0426725	0.0315801	0.0175957
AMY1B	0.00263909	0.00919646	0.00909176	0.0281709	0.00510859	0.0160669	0.00447468	0.0292797	0.00780744	0.00260571	0.0122957	0.00221023	0.00181809	0	0.00237608			0.00697577	0.0164488	0.0138539	0.00570388	0.00139806
AMY1C	0.0216491	0.0817535	0.031558	0.0507726	0.0418973	0.0546309	0.0108617	0.0634406	0.0546582	0.0418821	0.0614834	0.0168021	0.0200059	0.0242537	0.0118831			0.0449869	0.0491003	0.0429868	0.0400559	0.0187142
AMY2A	0.0197072	0.0701274	0.0444346	0.0580313	0.0081735	0.0657718	0.0346013	0.0951771	0.0751131	0.0420542	0.0643986	0.0301443	0.0415154	0.0329847	0.0200299			0.0447564	0.0439922	0.0682972	0.0455324	0.03151
AMY2B	0.728076	0.645591	0.551732	0.849005	0.796256	0.580495	0.239103	0.658545	0.466103	0.508401	0.432354	0.474855	0.575671	0.388963	0.323164			0.6418	0.741919	0.454584	0.47187	0.429266
AMZ1	0.293539	0.46438	0.250291	0.418884	0.232192	0.169966	0.39606	0.233061	0.448153	0.376232	0.18264	0.219169	0.24926	0.346796	0.376909			0.33607	0.273681	0.359091	0.259347	0.324322
AMZ2	30.1136	29.4244	34.5306	26.3249	30.4827	28.1988	28.5455	38.4601	33.419	33.5516	37.4244	36.9533	34.7747	35.292	34.1481			31.3562	28.3355	33.4749	35.9764	34.7383
ANAPC1	12.1487	11.6036	12.9265	9.25564	9.72412	10.0153	11.4455	9.38028	11.5126	12.6947	12.5844	12.0124	13.8285	13.8841	13.6652			12.2263	9.66502	10.7795	12.4305	13.7926
ANAPC10	13.0362	16.641	14.8341	13.4091	16.2458	13.6693	14.1815	18.4362	15.1696	17.1548	15.2713	19.8518	13.5354	15.3721	17.8057			14.8371	14.4414	15.9291	17.426	15.5711
ANAPC11	46.2132	67.3602	73.5922	52.5282	68.8771	66.8499	72.1585	88.8494	58.4548	48.9268	59.6632	79.3688	73.0512	69.44	72.9329			62.3885	62.7517	73.1542	62.6529	71.808
ANAPC13	72.1912	69.3702	71.7517	55.4157	66.1807	60.002	82.9976	87.4634	73.6486	71.2426	67.9909	74.2188	72.2357	77.6641	74.9225			71.1044	60.5328	81.3699	71.1508	74.9408
ANAPC15	17.4221	17.6657	18.705	16.3321	16.7778	17.0863	17.5666	22.5128	19.6364	24.4182	20.8219	19.8896	22.0561	19.395	19.2275			17.9309	16.7321	19.9053	21.7099	20.2262
ANAPC16	35.0214	33.6842	29.3443	26.5766	28.7777	27.5248	35.4588	35.2533	30.1385	30.5989	35.6194	34.4737	29.9426	36.3291	30.2583			32.6833	27.6264	33.6169	33.564	32.1767
ANAPC2	9.95317	10.6486	10.0348	10.2772	9.69198	10.179	11.8256	9.97603	10.1809	10.5963	11.3151	10.7608	12.2936	12.0241	11.422			10.2122	10.0494	10.6608	10.8907	11.9132
ANAPC4	10.2431	8.9786	9.21078	7.85221	8.18358	7.24827	8.57243	11.1548	9.58807	9.54213	9.97452	9.35234	11.0543	10.4821	11.0595			9.47749	7.76135	9.77177	9.623	10.8653
ANAPC5	52.2863	50.474	52.2588	44.0724	47.6188	49.022	48.9471	58.5722	51.8493	50.3776	49.6974	52.9861	53.0922	54.4866	53.1913			51.673	46.9044	53.1229	51.0204	53.59
ANAPC7	24.8253	23.3184	24.5948	18.6589	20.1249	20.7211	24.2159	24.1306	23.7287	25.0878	24.3161	25.1909	26.1063	27.349	25.6048			24.2462	19.835	24.0251	24.8649	26.3534
ANG	2.2302	2.29269	2.66876	2.91747	2.18265	2.33884	2.95978	4.48369	1.73025	2.27757	1.64952	1.97144	2.29882	2.4637	2.65662			2.39722	2.47965	3.05791	1.96618	2.47305
ANGEL1	5.97747	6.24711	5.86089	4.96258	5.16743	5.52429	6.73544	5.64252	5.91316	6.05516	6.20673	6.37967	6.82393	6.17023	6.63577			6.02849	5.2181	6.09704	6.21385	6.54331
ANGEL2	8.11663	8.2131	7.58003	7.6063	7.24305	6.12354	7.74947	7.76525	8.04898	8.62927	8.87191	9.21285	8.88065	8.81019	9.26989			7.96992	6.99096	7.85457	8.90468	8.98691
ANGPT1	4.8091	4.17083	4.17667	4.81482	4.86301	4.00145	4.55624	2.74515	5.0678	10.3867	9.57514	9.59719	4.62846	5.7828	4.86198			4.38553	4.55976	4.12306	9.85301	5.09108
ANGPT2	0.0658239	0.16516	0.058913	0.0597582	0.0101355	0.0602888	0.128788	0.0727352	0.064844	0.00255551	0.0138306	0.0240372	0.0113526	0.0399222	0.022763			0.0966323	0.0433942	0.0887891	0.0134744	0.0246793
ANGPT4	0.00750386	0.0326041	0.00684124	0.0169147	0.0332982	0.0129392	0.00756339	0.0758037	0.00431521	0.00370445	0.000728107	0.00176729	0.00698463	0.00287227	0.000562926			0.0156497	0.0210507	0.0292274	0.00206662	0.00347328
ANGPTL1	3.29269	4.20125	4.10721	3.92792	3.84855	4.27305	3.72794	3.91014	4.00971	2.70927	3.50411	3.17617	0.916514	1.31415	1.82288			3.86705	4.01651	3.8826	3.12985	1.35118
ANGPTL2	4.31439	5.05468	4.65667	6.55902	5.82349	5.20375	4.66312	3.84913	4.52059	5.07507	5.44195	4.91488	4.18421	3.38091	4.04207			4.67525	5.86209	4.34428	5.14397	3.86906
ANGPTL3	0	0	0	5.06723e-74	0	0	0	0	0	0	2.28367e-38	0	0	0	0			0	1.68908e-74	0	7.61223e-39	0
ANGPTL4	80.3692	77.0863	72.6569	118.95	103.411	104.804	86.5602	80.8321	78.9336	90.4776	80.724	113.942	86.579	105.501	101.68			76.7041	109.055	82.1086	95.0479	97.92
ANGPTL5	0.93805	0.873562	0.756167	0.803109	0.682661	0.929445	0.930705	1.16133	1.22671	0.666968	1.1311	0.955379	1.55412	1.17035	1.3311			0.855926	0.805072	1.10625	0.917816	1.35186
ANGPTL6	0.198788	0.161137	0.0671472	0.13751	0.180656	0.245821	0.215043	0.156326	0.132773	0.100884	0.0449007	0.0301001	0.0723438	0.151536	0.0873778			0.142357	0.187996	0.168047	0.0586283	0.103753
ANGPTL7	0	7.87938e-215	0	0.0604562	0.00784831	0.0165006	0	0	0	0	0	0	2.47679e-230	0.0308974	7.27784e-205			2.62646e-215	0.0282684	0	0	0.0102991
ANHX	0	0.00153561	0	0	0	0	0	0	0	0	0	0	0.0010932	0.00437356	0.0014286			0.00051187	0	0	0	0.00229845
ANK1	0.199171	0.129144	0.127773	0.211468	0.210594	0.222518	0.153941	0.144923	0.21055	0.136968	0.255345	0.154551	0.123605	0.138266	0.121979			0.152029	0.21486	0.169805	0.182288	0.12795
ANK2	2.54897	2.22508	2.42725	1.72887	1.88374	1.88476	2.55908	1.93346	2.55893	1.97048	1.92454	2.04569	2.37847	2.43053	2.1705			2.40043	1.83246	2.35049	1.98024	2.3265
ANK3	0.151643	0.0718092	0.0803147	0.0575912	0.0585206	0.0981483	0.0762459	0.177727	0.110409	0.0422527	0.0702115	0.0695583	0.159019	0.109095	0.0907422			0.101256	0.07142	0.121461	0.0606742	0.119619
ANKAR	0.338957	0.394526	0.281877	0.453202	0.345226	0.308278	0.254911	0.306097	0.35743	0.273746	0.224466	0.176172	0.370302	0.359234	0.337473			0.338453	0.368902	0.306146	0.224795	0.35567
ANKDD1A	1.09676	1.00637	0.883391	1.12531	0.99952	1.13298	1.35236	0.918312	1.02789	0.885894	0.811235	0.853948	0.950879	1.09873	0.981822			0.995507	1.08594	1.09952	0.850359	1.01048
ANKDD1B	0.252137	0.193575	0.105343	0.234341	0.126159	0.303428	0.264211	0.0864684	0.114267	0.169327	0.120953	0.13274	0.168589	0.174891	0.196219			0.183685	0.221309	0.154982	0.141007	0.1799
ANKEF1	0.55221	0.407149	0.422442	0.259221	0.422951	0.435511	0.684225	0.448169	0.514219	0.764808	0.696595	0.640018	0.629726	0.631869	0.646017			0.4606	0.372561	0.548871	0.700474	0.635871
ANKFN1	0.0573861	0.111705	0.104696	0.0461686	0.045937	0.083454	0.0705097	0.0542899	0.122501	0.0944249	0.0910515	0.0371732	0.0607328	0.0862258	0.100725			0.0912624	0.0585199	0.0824335	0.0742165	0.0825612
ANKFY1	19.1189	20.2795	18.9887	18.0293	18.0665	17.8128	20.27	16.6476	19.4378	16.0261	16.4884	16.6971	15.3899	16.5553	16.3008			19.4624	17.9695	18.7851	16.4039	16.082
ANKH	25.842	26.0443	26.9485	28.6421	26.562	28.6108	27.3318	25.4802	26.7875	27.9793	26.383	26.4644	27.2345	27.9313	23.6975			26.2783	27.9383	26.5332	26.9422	26.2878
ANKHD1	7.60939	7.00405	6.9085	7.205	6.0516	5.77882	6.37811	5.10644	7.25244	7.88317	5.98789	6.42008	6.9717	8.075	7.0192			7.17398	6.34514	6.24566	6.76371	7.3553
ANKHD1-EIF4EBP3	4.89762	5.67549	5.5155	6.06888	6.05782	6.29039	6.40107	3.56577	5.25476	4.05503	5.46358	4.86462	5.43207	4.86889	5.33722			5.36287	6.13903	5.07387	4.79441	5.21273
ANKIB1	14.3842	13.9513	13.3048	12.9311	12.1943	13.074	14.9163	11.037	14.1048	13.129	13.6312	12.3398	12.7032	12.6853	12.7558			13.8801	12.7331	13.3527	13.0333	12.7148
ANKK1	0.0268564	0.0571376	0	0.0134744	0.042852	0.0179668	0	0	0	0.00688171	0.0171873	0	0.0203378	0.0271216	0.0132881			0.027998	0.0247644	0	0.008023	0.0202492
ANKLE1	0.635592	0.692368	0.546328	0.769171	0.655184	0.634108	0.678179	0.611464	0.630699	0.464164	0.476385	0.629527	0.987776	0.867684	0.938281			0.624763	0.686154	0.640114	0.523359	0.931247
ANKLE2	31.9904	29.8515	29.3495	33.3503	32.1385	32.8424	31.0113	24.5942	28.3555	29.3457	31.1896	29.7626	28.247	27.5246	27.6352			30.3971	32.7771	27.987	30.0993	27.8023
ANKMY1	1.61541	1.59004	1.93917	1.52358	1.32095	1.59014	1.80312	1.26424	1.55737	1.65418	1.63461	1.38001	1.59926	1.37006	1.5601			1.71487	1.47822	1.54158	1.55627	1.50981
ANKMY2	6.98012	6.89602	7.58385	6.68426	7.33432	6.51692	6.78718	7.48637	7.19906	8.5131	7.35548	7.2513	7.46775	7.8644	6.28817			7.15333	6.84517	7.15754	7.70663	7.20677
ANKRA2	8.02383	8.06971	6.87105	7.53356	8.53337	8.61207	7.47803	9.00415	6.6158	5.83484	5.46271	6.47895	6.29779	6.01475	6.7223			7.65486	8.22633	7.69933	5.9255	6.34495
ANKRD1	5.97645	5.47839	6.03297	6.42152	5.71904	5.46978	6.1837	7.41085	6.80752	19.7525	15.9708	21.8469	7.56424	8.58285	8.46454			5.82927	5.87011	6.80069	19.1901	8.20388
ANKRD10	10.9749	11.4377	11.5877	22.2468	15.609	14.4509	11.964	12.1205	8.65114	6.32685	7.84285	6.90198	8.90625	7.76612	7.46391			11.3334	17.4356	10.9119	7.02389	8.04543
ANKRD11	17.0321	16.5722	16.6478	18.6287	17.088	17.1597	16.3417	8.82937	15.3471	15.238	14.5318	15.3088	17.0548	16.2492	15.6302			16.7507	17.6255	13.5061	15.0262	16.3114
ANKRD12	4.19184	3.89586	4.28699	5.0033	4.02554	3.63293	3.5085	2.42036	3.94431	3.46666	3.49037	3.26842	3.66232	3.65972	3.45231			4.1249	4.22059	3.29106	3.40848	3.59145
ANKRD13A	29.9297	27.9185	29.0018	24.794	25.5176	23.9673	26.0884	23.9583	26.4545	40.0386	37.502	37.6499	34.9107	35.367	33.2703			28.95	24.7596	25.5004	38.3968	34.516
ANKRD13B	5.70549	5.848	5.91878	6.18886	5.63176	5.90692	7.10134	5.89195	5.6229	5.60614	5.30746	5.41458	6.58563	5.6582	5.56307			5.82409	5.90918	6.2054	5.44273	5.93563
ANKRD13C	14.7539	13.0196	15.0247	16.3117	14.4245	12.4005	13.2313	13.8424	12.672	16.8333	14.2479	13.2099	15.5676	14.1108	14.4774			14.2661	14.3789	13.2486	14.7637	14.7186
ANKRD13D	9.05717	11.3811	8.47553	10.1504	9.60453	10.4947	11.0396	10.7506	9.4105	8.98567	10.1688	9.90943	9.69355	9.54803	10.7527			9.63793	10.0832	10.4002	9.68797	9.99809
ANKRD16	3.5024	3.63595	2.96773	2.43479	3.66069	2.32151	3.48141	3.49795	3.81291	4.03407	3.99965	3.43952	3.86309	3.56486	3.83391			3.36869	2.80566	3.59742	3.82441	3.75395
ANKRD17	17.0994	16.6776	17.4344	16.1572	16.4931	16.0847	17.5762	13.1203	18.1355	17.6297	16.285	17.3647	17.3802	18.0521	17.4831			17.0705	16.245	16.2773	17.0931	17.6385
ANKRD18A	0	0.000350842	0	0	0	0	0.0249396	0	0	0	0.0145006	0.011732	0.0139493	0.0114125	0.0195787			0.000116947	0	0.0083132	0.0087442	0.0149802
ANKRD18B	0.034455	0.03211	0.0165236	0.050507	0.0531969	0.0133874	0.0254273	0	0.0165636	0.0108416	0	0.028445	0.0202735	0.0233757	0.0514399			0.0276962	0.0390304	0.013997	0.0130955	0.0316964
ANKRD2	0.474376	0.71768	0.599411	0.553602	0.410131	0.866528	0.649557	0.767166	0.415268	0.482256	0.484569	0.383331	0.793681	0.580932	0.767066			0.597156	0.610087	0.610664	0.450052	0.713893
ANKRD20A1	0.0206595	0.0118202	0.0225825	0.0338893	0.0130127	0.0113612	0.00748281	0	0.00406825	0.0211594	0.0108338	0.0271038	0.00854013	0.0266731	0.0329649			0.0183541	0.0194211	0.00385035	0.019699	0.022726
ANKRD20A2	0.0104444	0.0118214	0.00780154	0.022593	0.00999665	0.00997577	0.00824891	0.000526425	0.00407375	0.0197993	0.0113987	0.0270644	0.00867622	0.0360901	0.0198842			0.0100224	0.0141885	0.00428303	0.0194208	0.0215502
ANKRD20A3	0.0104038	0.0124076	0	0.0169446	0.0130129	0.0222869	0.00771631	0.0083656	0.00852795	0.00692364	0.0111007	0.0188978	0.00851665	0.0308755	0.0138753			0.0076038	0.0174148	0.00820329	0.0123074	0.0177558
ANKRD20A4	0.00282827	0.00899712	0	0.0169754	0.0059979	0.00258187	0.00401238	0	0	0.0108296	0.0108263	0.0203914	0.0103031	0.0137834	0.00396836			0.0039418	0.00851839	0.00133746	0.0140158	0.00935162
ANKRD22	0.00746588	0.0144099	0.0271032	0.0748369	0.071866	0.0923795	0.0179736	0.0773251	0.02198	0	0	0.00700155	0.0522471	0.0068275	0.00170075			0.0163263	0.0796941	0.0390929	0.00233385	0.0202585
ANKRD23	0.366938	0.395679	0.485505	0.46488	0.313167	0.263741	0.386951	0.297249	0.384239	0.429314	0.348178	0.259776	0.676774	0.71362	0.626692			0.416041	0.347263	0.356146	0.345756	0.672362
ANKRD24	0.160708	0.224111	0.148636	0.308214	0.236857	0.224105	0.254993	0.167701	0.176895	0.146489	0.105093	0.0973633	0.387293	0.378043	0.28208			0.177818	0.256392	0.199863	0.116315	0.349139
ANKRD26	2.60814	2.36485	2.39894	2.14857	2.08453	1.89229	2.3033	1.59186	2.77771	2.80733	2.61928	2.98117	2.85716	2.23744	2.62563			2.45731	2.0418	2.22429	2.80259	2.57341
ANKRD27	12.4293	13.4386	12.4511	12.4385	12.9425	10.8425	12.934	11.4672	13.4583	13.6014	12.9889	13.6182	13.381	14.1277	13.8779			12.773	12.0745	12.6198	13.4028	13.7955
ANKRD28	25.9849	25.4904	26.2127	29.2576	25.0361	26.6246	25.4068	17.8543	22.5693	21.8796	22.0209	20.3186	21.3001	20.8871	19.6748			25.896	26.9728	21.9435	21.4064	20.6207
ANKRD29	5.9178	6.23806	5.22724	4.44464	5.69096	4.1427	5.6505	5.51805	5.45919	6.61538	7.97527	7.26063	6.0711	5.06249	5.84397			5.79437	4.75943	5.54258	7.28376	5.65919
ANKRD30A	0	0.000247397	0	0	0	0	0	0	0	0	0	0	0	0	0			8.24657e-05	0	0	0	0
ANKRD30B	0.0121773	0.0246406	0.00593341	0.062752	0.000761469	0.009891	0.012058	0.00145438	0.01602	0.00181296	0.000671949	0.000864915	0.00659646	0.00746435	0			0.0142504	0.0244682	0.00984413	0.00111661	0.00468694
ANKRD31	0.0630032	0.0443795	0.0889316	0.0638617	0.0594813	0.0435061	0.0686187	0.018232	0.0524185	0.0535547	0.0622541	0.00735424	0.0476313	0.0396802	0.0652333			0.0654381	0.0556164	0.0464231	0.0410543	0.0508483
ANKRD32	3.9975	3.29067	4.1729	3.09924	4.05853	3.20822	3.55165	3.8083	3.52332	4.7282	4.09099	3.49774	4.96769	4.45	4.61467			3.82036	3.45533	3.62776	4.10564	4.67745
ANKRD33	0.212712	0.0978507	0.132281	0.269563	0.130036	0.239781	0.184912	0.134771	0.116376	0.100008	0.230795	0.131164	0.293318	0.244527	0.169993			0.147615	0.213127	0.145353	0.153989	0.235946
ANKRD33B	1.68003	1.78208	1.62151	1.45836	1.36813	1.32764	1.42854	1.12793	1.28796	1.26383	1.29919	1.0973	1.21852	1.04626	1.11946			1.69454	1.38471	1.28148	1.22011	1.12808
ANKRD34A	6.28007	6.13683	5.96442	4.36758	5.36862	5.64761	7.33452	9.01556	6.59842	6.13839	7.21284	5.76927	8.26898	7.68998	9.59529			6.12711	5.12794	7.6495	6.3735	8.51808
ANKRD34B	0.00177887	0.00172132	0.00324358	0	0.00172129	0	0	0	0.00350732	0	0	0	0	0	0.0187797			0.00224792	0.000573763	0.00116911	0	0.0062599
ANKRD34C	0	0	0	0.0105899	0	0	0	0	0	0	0	0.0109025	0	0.00532832	0.00522138			0	0.00352997	0	0.00363417	0.00351657
ANKRD35	1.19033	1.19775	1.28058	0.689121	0.860162	1.02148	1.33124	1.27576	1.31974	1.164	1.41735	1.1558	1.45596	1.31719	1.51075			1.22289	0.856921	1.30891	1.24572	1.42797
ANKRD36	0.622926	0.736397	0.670231	0.644335	0.651692	0.506364	0.708748	0.43122	0.70794	0.708131	0.645466	0.560453	0.701023	0.589733	0.69589			0.676518	0.600797	0.615969	0.638017	0.662215
ANKRD36B	0.78484	0.713691	0.713852	0.621864	0.589519	0.519939	0.748119	0.508181	0.695224	0.67839	0.783375	0.634615	0.873746	0.564565	0.705184			0.737461	0.577107	0.650508	0.698793	0.714498
ANKRD36C	0.411164	0.355415	0.353561	0.447822	0.416255	0.327847	0.361997	0.147574	0.425068	0.439443	0.347789	0.378041	0.344055	0.31583	0.38087			0.37338	0.397308	0.311546	0.388424	0.346918
ANKRD37	1.98569	2.48802	1.85851	3.61719	2.20822	2.71472	1.73028	2.82158	1.92122	3.41396	2.08814	2.03001	1.20537	1.44632	1.5101			2.11074	2.84671	2.15769	2.5107	1.38726
ANKRD39	6.5534	7.58324	8.43007	8.04773	7.8222	7.42108	7.80526	10.4697	8.23516	9.84113	9.36424	7.7958	8.7783	8.50013	8.74659			7.52224	7.76367	8.83671	9.00039	8.67501
ANKRD40	21.8337	21.8503	21.0458	21.0093	20.0287	17.9341	20.7235	17.1311	21.2268	21.9679	21.7057	19.9625	23.6393	23.6639	22.9711			21.5766	19.6574	19.6938	21.212	23.4248
ANKRD42	6.34521	5.61841	5.32685	7.08141	4.37312	6.40718	5.52504	5.6201	6.24402	6.08451	6.22234	5.45585	6.35544	5.32832	6.2852			5.76349	5.9539	5.79639	5.9209	5.98965
ANKRD44	0.154324	0.147292	0.116102	0.10197	0.118045	0.268708	0.229715	0.16511	0.15679	0.252568	0.180323	0.202347	0.297943	0.292263	0.347636			0.139239	0.162908	0.183872	0.211746	0.312614
ANKRD45	0.367332	0.695411	0.801571	0.388665	0.592968	0.389438	0.330852	0.161827	0.512831	0.139722	0.181459	0.348975	0.0855191	0.30716	0.26115			0.621438	0.457024	0.33517	0.223385	0.217943
ANKRD46	3.23223	4.1146	4.42112	4.04535	4.67175	3.46561	3.20821	2.9301	3.18632	4.13244	2.64849	2.79516	2.34223	3.32697	2.88296			3.92265	4.0609	3.10821	3.19203	2.85072
ANKRD49	3.87211	4.67037	3.28974	3.71429	4.31262	4.4117	3.61081	3.78174	3.42225	2.90153	2.94245	2.84841	3.27809	3.35462	3.28918			3.94407	4.1462	3.60493	2.89746	3.3073
ANKRD50	4.10564	3.93686	4.40419	3.89258	4.11245	3.53748	4.17346	2.43007	4.06929	4.69526	4.41409	4.49474	4.31322	4.32174	4.46947			4.1489	3.8475	3.55761	4.5347	4.36814
ANKRD52	17.1378	16.3553	15.8768	17.2835	16.8783	15.937	16.4479	11.306	15.4324	16.7793	17.0172	16.6695	16.0463	15.7113	15.5851			16.4566	16.6996	14.3954	16.822	15.7809
ANKRD53	0.612384	0.566613	0.619248	0.803073	0.95407	0.511485	0.747205	0.728171	0.598385	0.484269	0.366218	0.414012	0.599473	0.533196	0.527713			0.599415	0.756209	0.691254	0.4215	0.553461
ANKRD54	9.58599	9.71364	9.20332	8.19455	8.61631	8.34697	9.57341	11.093	8.80579	8.79838	10.2189	8.65023	9.08963	9.28703	10.1321			9.50098	8.38594	9.82407	9.2225	9.50292
ANKRD55	0.00568301	0.00325876	0.00345412	0.00329836	0.00271558	0.00333052	0.00369144	0.0650443	0.00466872	0.00394855	0.034084	0.00500679	0.00393903	0.00280372	0.00303167			0.00413196	0.00311482	0.0244682	0.0143464	0.00325814
ANKRD6	0.140279	0.13177	0.0391386	0.361272	0.146925	0.127667	0.150959	0.155307	0.124353	0.150547	0.197361	0.222587	0.184117	0.139612	0.283073			0.103729	0.211955	0.14354	0.190165	0.202267
ANKRD60	0	0.00849244	0	0.00801148	0	0	0	0.00973245	0	0	0	0.00214789	0	0	0			0.00283081	0.00267049	0.00324415	0.000715963	0
ANKRD61	0.15872	0.295289	0.212225	0.311278	0.286376	0.0864629	0.372409	0.111413	0.264079	0.279907	0.0955454	0.0951986	0.0340008	0.273609	0.144254			0.222078	0.228039	0.2493	0.156884	0.150621
ANKRD62	0.018228	0.0286027	0.0175167	0.0224857	0.0159696	0.015591	0.0312832	0.015023	0.0194267	0.0228615	0.0361385	0.0283108	0.0354644	0.0248916	0.02794			0.0214491	0.0180154	0.021911	0.0291036	0.029432
ANKRD63	0	0	0	0.00581122	0	0.00774862	0.0101096	0.00705945	0.00823989	0.0188565	0	0.00787416	0.0115158	0.0175446	0			0	0.00451995	0.00846965	0.00891022	0.0096868
ANKRD65	0.0816099	0.190606	0.0358904	0.197801	0.190761	0.215276	0.333665	0.399739	0.254713	0.0976352	0.0463184	0.148912	0.0810843	0.180962	0.195065			0.102702	0.201279	0.329372	0.0976219	0.15237
ANKRD66	0	0	0	0	0	0	0	0	0	0	0	0	0	0	0			0	0	0	0	0
ANKRD7	0.0991137	0.144818	0.0916254	0.141331	0.023596	0	0	0.0574814	0.0990756	0.302001	0.171561	0.206791	0.205303	0.370151	0.091113			0.111852	0.0549757	0.0521857	0.226784	0.222189
ANKRD9	2.04513	2.2362	1.69519	2.07879	2.2575	1.60873	2.25932	2.18462	1.63514	1.41984	1.81414	1.4258	2.281	1.85773	1.93801			1.99217	1.98167	2.02636	1.55326	2.02558
ANKS1A	4.33863	3.98951	3.98177	4.11004	3.99788	3.78354	4.43883	3.41252	4.32285	3.87639	3.8107	3.80218	4.63919	4.29268	4.52219			4.1033	3.96382	4.05807	3.82976	4.48469
ANKS1B	0.0675858	0.0953879	0.261654	0.0542282	0.0691423	0.279328	0.0715034	0.0634152	0.000818738	0.0253457	0.0575797	0.0555788	0.0515678	0.0316837	0.111097			0.141543	0.134233	0.0452458	0.0461681	0.0647828
ANKS3	5.74981	6.44516	5.67227	5.86374	6.15721	7.17391	5.48141	4.5348	4.82154	4.97722	4.49263	5.46425	5.85322	4.80906	5.47428			5.95575	6.39829	4.94592	4.97803	5.37885
ANKS4B	0.0537373	0.0220074	0.0110585	0.097311	0.0515488	0.065725	0.0976848	0.00336261	0.00448414	0	0.0121151	0	0.0553957	0.0738275	0.0968795			0.0289344	0.0715283	0.0351772	0.00403837	0.0753676
ANKS6	7.28398	7.31708	6.69627	6.36999	6.43062	6.74611	7.78504	6.60396	6.57482	7.16252	6.19038	6.71468	8.39757	8.27553	7.44676			7.09911	6.51557	6.98794	6.68919	8.03995
ANKUB1	0	0	0.000400329	0.0135268	0.000424889	0	0	0	0	0	0	0	0.00120994	0	0.00237173			0.000133443	0.00465056	0	0	0.00119389
ANKZF1	7.94726	7.29352	7.49109	7.23929	6.9522	7.36284	7.82697	7.28544	6.96118	7.64397	7.94165	8.13647	7.32034	7.62923	7.80649			7.57729	7.18478	7.35786	7.90736	7.58535
ANLN	30.1985	26.3091	31.2294	13.6248	19.0919	18.3473	28.6828	23.8044	30.932	38.3976	36.1874	32.7195	45.7935	40.9699	41.0921			29.2457	17.0213	27.8064	35.7682	42.6185
ANO1	0.0066629	0.000489652	0	0.0110663	0.0117232	0.060407	0.05897	0.0548231	0.0329787	0	0	0	0.0112311	0.000232429	0.0218282			0.00238418	0.0277322	0.0489239	0	0.0110972
ANO10	32.3077	30.8998	33.1382	30.0695	30.3926	30.9522	29.4314	34.9832	32.8836	32.5331	30.0241	32.6863	32.2458	35.1545	34.7284			32.1152	30.4714	32.4327	31.7478	34.0429
ANO2	0	3.50011e-05	0.000131909	0.0161256	0.000198335	0	8.74998e-05	0	0	0.019329	0	6.81518e-05	0.0651395	0.0498812	0.0633742			5.56367e-05	0.00544131	2.91666e-05	0.00646572	0.059465
ANO3	6.39813	5.39332	6.1633	2.88142	3.40313	3.66832	5.80401	4.97677	6.9706	3.47404	3.24201	3.08502	5.7025	4.98287	4.67112			5.98492	3.31762	5.91713	3.26702	5.11883
ANO4	2.37889	2.11515	2.02581	2.45593	1.93361	2.1286	2.44218	2.20382	2.72552	2.31333	1.90162	2.17739	2.41216	2.53352	2.16207			2.17328	2.17271	2.45717	2.13078	2.36925
ANO5	0	0	0	0	0	0	0	0	0	0	0	0	0.00299634	0.00409473	0.000278995			0	0	0	0	0.00245669
ANO6	18.6552	17.8526	18.3318	20.6689	18.0503	17.6879	17.4268	14.7085	18.3458	19.287	17.0614	18.0874	17.8193	18.8948	18.0209			18.2799	18.8024	16.827	18.1453	18.245
ANO7	0.237805	0.372439	0.230322	0.251836	0.228746	0.290973	0.342275	0.256184	0.20662	0.377454	0.340965	0.282724	0.29214	0.283428	0.327113			0.280189	0.257185	0.26836	0.333714	0.300894
ANO7P1	3.31538	4.53128	3.53027	5.69746	4.90762	4.8012	3.96238	3.63623	3.29965	1.43855	2.13292	0.962561	1.18747	1.84651	1.81652			3.79231	5.13543	3.63275	1.51134	1.61683
ANO8	1.26882	1.39923	1.47111	1.14686	1.17876	1.34514	1.70934	1.08404	1.42407	1.42917	1.34943	1.36837	2.01075	1.41169	1.69343			1.37972	1.22359	1.40582	1.38232	1.70529
ANO9	0.163249	0.072179	0.101174	0.0828717	0.0487513	0.0777863	0.214563	0.244127	0.251778	0	0.0440981	0.00986212	0.0156213	0.022873	0.00423698			0.112201	0.0698031	0.236823	0.0179867	0.0142438
ANP32A	53.4177	55.7803	60.7984	43.3386	46.0914	44.2138	53.7825	60.3301	58.3574	70.5799	66.5932	67.6403	63.1895	60.3695	63.1573			56.6655	44.5479	57.49	68.2711	62.2388
ANP32B	132.685	122.825	132.54	122.415	130.021	116.809	114.602	134.816	123.303	143.053	150.118	135.441	136.061	133.508	130.718			129.35	123.082	124.24	142.871	133.429
ANP32C	0.386178	0.509363	0.711709	0.762121	0.864259	0.506657	0.673641	1.3969	1.40687	0.826751	1.30221	0.461002	0.882391	0.354826	0.776961			0.53575	0.711012	1.15914	0.863321	0.671393
ANP32D	0	0	0	0	0.42883	0	0	0.327577	0	0	0	0.208058	0.0508818	0.203562	0			0	0.142943	0.109192	0.0693527	0.0848146
ANP32E	20.6759	20.9187	25.4304	16.4087	19.5262	17.9427	22.3765	21.5516	26.6998	31.1081	28.0241	25.6454	29.4672	26.2095	25.8305			22.3417	17.9592	23.5426	28.2592	27.1691
ANPEP	778.796	805.513	760.669	759.236	781.946	806.768	833.235	692.5	768.077	641.614	649.257	644.619	726.323	724.449	737.724			781.659	782.65	764.604	645.163	729.499
ANTXR1	49.6034	47.3254	46.9595	68.3611	59.4	57.1966	44.0042	39.184	43.3559	66.9304	65.4864	63.8814	45.8435	49.1597	48.326			47.9628	61.6526	42.1814	65.4327	47.7764
ANTXR2	49.6078	48.3648	46.6502	57.7425	54.0073	51.9998	45.3274	36.2639	45.6932	39.6654	39.8761	39.9019	43.1372	46.8134	42.4541			48.2076	54.5832	42.4282	39.8145	44.1349
ANTXRL	0	0	0	0	0	0	0	0	0	0	0	0	0	0	0			0	0	0	0	0
ANXA1	431.668	448.6	441.845	389.427	399.677	397.381	403.301	474.645	437.101	457.826	444.32	468.033	393.61	423.564	417.408			440.704	395.495	438.349	456.726	411.527
ANXA10	0.0675709	0.0311876	0.0226447	0.0407579	0.0340481	0.0295125	0.0278962	0.0261572	0.0599801	0.00588763	0.054233	0.00529267	0.00529601	0.0135818	0.0103812			0.0404677	0.0347728	0.0380112	0.0218044	0.009753
ANXA11	76.6559	78.9384	78.901	65.8495	68.8884	72.7065	74.8334	84.1605	73.8933	83.0442	84.3221	84.1167	75.4472	75.2723	73.7988			78.1651	69.1481	77.6291	83.8277	74.8394
ANXA13	0.00149414	0.000963869	0.000908135	0.000909281	0.000481925	0	0.000803197	0.000552276	0.00196395	0.000491744	0.000579912	0	0.0153085	0	0			0.00112205	0.000463735	0.00110647	0.000357219	0.00510283
ANXA2	1224.88	1273.05	1246.95	1099.81	1229.26	1284.33	1189.44	1462.73	1177.98	1200.85	1198.12	1290.4	1101.07	1153.66	1180.96			1248.29	1204.47	1276.72	1229.79	1145.23
ANXA2R	0.513555	0.658407	0.83182	1.29116	1.07477	0.726075	0.630411	1.39248	1.02951	0.590105	0.618	1.03184	0.559861	0.949328	0.88245			0.667927	1.03067	1.01747	0.746648	0.797213
ANXA3	0.955035	1.23898	1.40987	0.640005	0.639064	1.05213	1.24932	1.34367	1.16144	0.40308	0.72471	0.545235	0.904854	0.721012	0.844562			1.2013	0.777066	1.25148	0.557675	0.823476
ANXA4	59.0064	60.0215	61.3319	55.0266	54.4956	56.0697	59.7524	67.95	59.0621	56.4682	54.122	54.1113	54.4429	57.9221	54.4154			60.1199	55.1973	62.2548	54.9005	55.5935
ANXA5	386.061	380.495	394.62	446.048	423.133	404.83	359.631	432.128	372.618	481.085	442.101	463.775	366.997	389.222	389.039			387.059	424.67	388.126	462.32	381.753
ANXA6	154.483	158.056	152.727	140.812	152.837	158.395	155.461	155.498	151.506	175.62	172.352	176.705	163.954	166.31	167.925			155.089	150.681	154.155	174.892	166.063
ANXA7	58.8552	55.2772	58.184	50.2477	51.0405	50.6065	57.9358	61.0998	57.1621	54.0801	53.8994	51.5847	57.2969	59.133	55.6781			57.4388	50.6316	58.7326	53.1881	57.3693
ANXA8	0.145149	0.160876	0.112466	0.135844	0.1604	0.0965802	0.149906	0.103393	0.224693	0.106266	0.110821	0.147944	0.15296	0.219261	0.110371			0.139497	0.130941	0.159331	0.121677	0.160864
ANXA8L1	0.0243977	0.0236491	0	0.0447838	0.0663013	0.0396647	0.0345655	0.0493525	0.0486972	0.0241324	0.0819592	0.0357375	0.0415632	0.0202986	0.0146633			0.0160156	0.0502499	0.0442051	0.0472764	0.0255084
ANXA9	0.315509	0.251065	0.342881	0.200037	0.185933	0.19124	0.307425	0.258809	0.325616	0.228952	0.446664	0.325705	0.476882	0.468269	0.396141			0.303152	0.192403	0.297283	0.333774	0.447097
AOAH	1.66116e-05	0.000428644	0.000444244	0.000677317	0.000471499	0.000377426	0.000223883	0.000343845	0.00058954	0.000196816	0.000309473	0.000532075	0.000305152	2.44164e-05	0.000209356			0.0002965	0.000508747	0.000385756	0.000346121	0.000179641
AOC1	0.12335	0.111377	0.0250525	0.196775	0.146388	0.0940417	0.153292	0.0613522	0.124197	0.0414533	0.0318808	0.0907411	0.132639	0.0937336	0.12406			0.0865932	0.145735	0.112947	0.0546917	0.116811
AOC2	1.61986	1.72253	1.41632	2.96066	1.97591	1.97712	1.54843	1.2144	1.74465	1.27993	1.14957	1.60679	1.88555	1.89307	1.78521			1.58624	2.30456	1.50249	1.34543	1.85461
AOC3	1.07709	1.406	0.791731	1.88016	1.72451	0.803135	1.13148	0.808628	1.1276	0.768946	0.813062	1.06163	1.0078	0.847159	1.09187			1.09161	1.46927	1.02257	0.881213	0.982276
AOX1	47.7713	46.1401	45.7767	37.0393	38.9723	38.0221	45.642	39.8062	45.7367	44.3	44.4532	42.3311	45.0047	43.4767	43.6103			46.5627	38.0112	43.7283	43.6948	44.0306
AP1AR	12.8337	12.0303	13.248	12.1281	10.949	10.4361	11.9949	10.8049	11.6345	10.6168	10.5339	10.6118	12.5145	11.7161	11.7205			12.704	11.1711	11.4781	10.5875	11.9837
AP1B1	29.9376	31.6112	31.2861	29.7373	29.9705	29.8018	32.1482	26.3467	29.9522	29.9452	28.7609	30.6468	31.7874	31.5399	31.8287			30.945	29.8365	29.4824	29.7843	31.7187
AP1G1	15.2094	14.2966	14.7489	13.8506	13.6115	12.9906	14.3393	12.733	13.8922	16.4017	15.2664	15.7605	16.2262	15.976	14.866			14.7516	13.4842	13.6548	15.8095	15.6894
AP1G2	2.95296	3.61752	2.75997	3.12854	3.22428	3.10108	3.17911	3.28424	2.91599	3.09381	3.31732	3.53093	3.69149	3.47755	3.8734			3.11015	3.1513	3.12645	3.31402	3.68081
AP1M1	49.7423	52.55	50.0746	42.6613	44.2544	44.5159	55.201	49.6767	46.9645	56.4854	60.3501	56.5315	54.9919	53.3266	53.7103			50.789	43.8105	50.6141	57.789	54.0096
AP1M2	0	0.00188274	0.00177387	0.0557375	0	0	0.034178	0.0334972	0.0297749	0	0.0340348	0.0284538	0.0402742	0.0231946	0.00175154			0.00121887	0.0185792	0.0324834	0.0208295	0.0217401
AP1S1	110.692	118.96	108.249	101.327	109.757	103.272	120.315	122.485	111.739	102.625	99.4894	113.899	111.55	123.126	124.799			112.634	104.785	118.18	105.338	119.825
AP1S2	8.68615	9.70267	9.61627	7.3667	8.27609	6.90844	8.28982	10.9609	9.69276	9.06351	7.4149	7.97974	10.8275	11.2684	10.6506			9.33503	7.51708	9.64783	8.15272	10.9155
AP1S3	1.85346	1.10247	1.58986	1.23193	0.895418	1.63677	0.751605	1.4407	1.43002	0.743882	0.801949	1.20147	2.6897	1.84574	1.52551			1.51526	1.25471	1.20744	0.915767	2.02032
AP2A1	54.6875	56.3554	53.832	55.6378	55.8795	55.7823	56.3763	48.4267	50.3411	56.4372	57.9206	58.9327	59.2009	55.5393	55.0916			54.9583	55.7665	51.7147	57.7635	56.6106
AP2A2	28.7293	29.6727	28.6896	27.7119	27.7171	27.3911	30.7004	26.477	27.6644	29.3366	27.5324	29.3752	30.3896	29.5898	29.9364			29.0305	27.6067	28.2806	28.7481	29.9719
AP2B1	46.0121	45.0505	45.7939	42.1457	42.0023	42.4231	44.2888	37.1454	43.3019	44.5463	42.7464	41.4702	44.7908	44.9916	45.2391			45.6188	42.1904	41.5787	42.921	45.0072
AP2M1	261.982	267.1	254.881	263.865	262.319	271.885	254.278	269.849	257.931	294.204	292.714	302.123	279.163	283.824	289.901			261.321	266.023	260.686	296.347	284.296
AP2S1	477.13	481.822	528.557	426.355	473.195	503.09	490.951	614.744	480.88	518.291	549.559	539.396	517.103	497.824	529.882			495.836	467.547	528.858	535.749	514.936
AP3B1	24.3785	23.4121	25.1399	20.8686	22.3311	21.6509	22.3809	21.7975	25.4549	27.5801	25.6461	25.78	24.3452	26.7653	24.1991			24.3102	21.6169	23.2111	26.3354	25.1032
AP3B2	0.2174	0.472309	0.317563	0.51372	0.233376	0.295768	0.120816	0.0340327	0.0896142	0.0384977	0.0464027	0.0186816	0.165799	0.171042	0.0961321			0.335757	0.347621	0.0814876	0.0345273	0.144324
AP3D1	48.543	48.3529	46.6737	48.3694	47.3713	48.3586	49.7768	36.8323	44.6321	42.5452	43.8219	43.7292	48.0871	48.4285	48.4382			47.8565	48.0331	43.7471	43.3654	48.3179
AP3M1	23.5023	23.722	24.8345	19.7635	21.7782	18.9131	21.6006	22.3659	22.8315	26.1395	24.7752	26.1887	24.2072	23.6267	24.3509			24.0196	20.1516	22.266	25.7011	24.0616
AP3M2	6.3407	6.4531	6.55356	5.24028	5.50132	4.8818	5.54614	5.54133	5.8549	5.78924	5.48413	6.17792	6.26464	5.61262	5.71035			6.44912	5.2078	5.64746	5.8171	5.86254
AP3S1	98.5956	93.1336	105.412	84.655	84.6049	84.3246	86.1176	112.765	103.529	113.19	109.558	106.902	98.6707	96.9921	96.0611			99.0471	84.5282	100.804	109.883	97.2413
AP3S2	18.6267	18.5357	20.11	15.2876	15.5314	14.7124	15.4528	14.0365	16.9622	20.4723	17.7075	20.2632	17.8706	16.8493	21.144			19.0908	15.1771	15.4838	19.481	18.6213
AP4B1	12.8209	13.0562	11.7294	11.0367	11.5839	12.2375	10.6684	13.3032	10.7563	11.2819	14.0414	13.1613	12.4908	13.0387	14.5915			12.5355	11.6194	11.576	12.8282	13.3737
AP4E1	4.26448	4.35897	4.79006	4.55408	3.76885	3.40295	3.57407	3.26359	4.5355	4.22968	3.94954	4.22588	4.94228	4.72968	4.62264			4.47117	3.90863	3.79105	4.13503	4.76487
AP4M1	7.54193	7.1226	6.52395	6.44937	6.21225	7.02837	8.12698	8.03282	8.14443	9.06446	8.85149	8.61156	8.20462	8.30744	8.72056			7.06283	6.56333	8.10141	8.8425	8.41087
AP4S1	1.60948	2.73329	2.71551	2.29867	3.0286	3.05197	2.78655	1.57754	2.80952	3.55853	2.78731	3.16774	2.44635	1.6122	2.92112			2.35276	2.79308	2.3912	3.17119	2.32656
AP5B1	5.30305	5.89555	5.09577	6.19943	5.33432	5.48161	6.63993	4.09665	5.32748	3.21807	4.54094	3.45592	4.23248	4.94009	4.21076			5.43146	5.67179	5.35469	3.73831	4.46111
AP5M1	10.4087	9.63147	12.3089	8.80145	9.85579	8.78357	9.88198	9.70208	10.0714	9.81421	9.90958	10.6718	10.743	10.3146	10.3504			10.783	9.14694	9.88515	10.1319	10.4693
AP5S1	5.5672	6.05258	6.14204	4.61914	5.06857	4.96995	5.1955	5.89652	5.54911	6.69851	5.89611	6.41284	6.41321	6.10063	5.27507			5.92061	4.88589	5.54704	6.33582	5.92964
AP5Z1	14.1691	15.6299	13.5881	17.7313	16.0788	15.9928	14.0537	11.5136	11.6195	9.24183	10.5187	9.9734	10.5946	10.0991	8.91111			14.4624	16.601	12.3956	9.91131	9.86827
APAF1	4.41163	3.99307	4.2742	4.09624	3.91241	3.9917	3.78872	3.71053	4.23077	5.50136	5.30749	4.36904	5.1637	4.76637	4.59625			4.2263	4.00012	3.91001	5.0593	4.84211
APBA1	1.80864	1.77321	1.61157	1.63594	1.53942	1.27287	1.82809	1.67555	1.44984	2.47418	2.20456	2.54612	2.38598	2.52801	2.12833			1.73114	1.48274	1.65116	2.40829	2.34744
APBA2	2.31083	2.17318	2.67162	2.44262	2.71279	2.73217	2.48649	2.23286	2.50339	1.76199	1.88867	2.20154	2.71124	2.21092	2.68729			2.38521	2.62919	2.40758	1.95073	2.53648
APBA3	5.65719	6.75899	5.85671	7.50004	7.1705	7.26468	6.88649	6.07072	5.66142	3.90249	4.76835	4.14613	4.4533	4.52245	4.89959			6.09096	7.31174	6.20621	4.27232	4.62511
APBB1	18.178	16.7942	16.5967	18.0217	16.6567	19.0212	16.87	18.1762	17.2944	15.248	14.5106	15.7148	27.1788	31.0496	30.314			17.1896	17.8999	17.4469	15.1578	29.5141
APBB1IP	1.40536	1.21368	1.24496	1.31537	1.38017	0.846384	1.17054	1.28499	0.949574	1.17339	1.19809	1.18311	1.15219	1.44365	1.194			1.288	1.18064	1.13503	1.18486	1.26328
APBB2	19.7588	17.9319	18.571	18.7922	19.8016	19.5693	19.5741	14.7004	19.3795	25.7662	23.9305	23.9123	19.6163	18.6744	19.0244			18.7539	19.3877	17.8847	24.5363	19.105
APBB3	2.61608	2.27135	1.47618	2.39782	2.18333	1.97162	1.83068	1.86887	2.38543	1.60527	1.57402	1.93841	1.94578	1.93361	1.92927			2.1212	2.18426	2.02833	1.7059	1.93622
APC	5.50988	5.03046	5.59024	4.89073	4.84818	4.36646	4.96678	3.26996	5.40362	6.08949	5.52542	5.80434	5.10375	5.42683	5.3092			5.37686	4.70179	4.54679	5.80642	5.27993
APC2	0.440398	0.472853	0.412531	0.536876	0.433546	0.500087	0.521406	0.424743	0.509955	0.39182	0.456445	0.439671	0.481781	0.454829	0.427571			0.441927	0.49017	0.485368	0.429312	0.454727
APCDD1	5.77523	6.03851	7.10578	2.66836	4.05621	4.19434	5.97644	5.57011	6.16678	7.19019	7.28976	6.41819	9.35628	8.55446	8.96749			6.30651	3.63964	5.90444	6.96605	8.95941
APCDD1L	53.134	51.3926	50.9349	75.9728	63.6455	64.5512	53.683	54.0911	48.9731	49.2229	48.5999	51.5772	54.7534	60.6411	55.9725			51.8205	68.0565	52.2491	49.8	57.1223
APCS	0	0	0	0	0	0	0	0	0	0	0	0	0	0	0			0	0	0	0	0
APEH	33.2777	35.7898	31.4393	27.8658	30.5052	31.7984	35.4686	39.6532	34.8257	36.4811	35.6476	35.3745	37.7803	39.7188	40.2658			33.5023	30.0565	36.6492	35.8344	39.255
APELA	0.0348836	0.0224959	0	0.0012612	0	0	0	0	0	0.0114807	0	0.0109851	0.0160202	0	0.00248751			0.0191265	0.0004204	0	0.0074886	0.00616924
APEX1	94.3467	95.4729	94.9913	78.1381	85.9517	87.9635	94.1415	107.367	93.4101	112.421	105.845	111.61	109.631	109.179	106.44			94.937	84.0178	98.3062	109.959	108.417
APEX2	12.8525	12.8298	13.1678	10.6847	12.2862	11.1428	13.6994	12.8168	12.2664	12.8657	12.5391	12.6384	13.4217	13.92	13.879			12.95	11.3712	12.9275	12.6811	13.7402
APH1A	48.1271	49.3765	48.5943	49.3508	51.1224	48.4295	50.271	51.5602	46.0734	46.5012	46.0001	46.7456	47.3057	45.1868	46.1899			48.6993	49.6342	49.3015	46.4156	46.2275
APH1B	7.33825	6.80012	6.7718	6.28073	7.02288	6.43086	5.83918	6.42696	7.01295	8.9718	9.56224	9.07398	6.99165	7.70912	7.63304			6.97006	6.57816	6.42636	9.20267	7.4446
API5	33.839	30.4867	34.1762	27.4279	27.3494	26.3571	29.0306	32.5064	34.8456	34.0986	30.8508	34.5909	35.6091	35.6472	35.3694			32.834	27.0448	32.1275	33.1801	35.5419
APIP	12.374	13.9473	11.3551	9.51379	10.6213	9.51158	11.7412	13.7406	15.3745	14.5727	15.9208	12.6824	15.5866	17.5631	17.433			12.5588	9.88222	13.6188	14.392	16.8609
APITD1	8.67076	6.41853	7.99969	6.02963	7.3003	6.13348	5.81706	8.72076	7.68335	7.37557	9.10453	7.36498	9.39874	8.65053	9.20506			7.69633	6.4878	7.40706	7.94836	9.08478
APITD1-CORT	0.407772	0.471216	0.379657	0.400065	0.423384	1.82407	0.660536	0.323633	0.815787	0.181102	0.296258	0.42509	0.504506	0.631879	0.618579			0.419548	0.882506	0.599985	0.300817	0.584988
APLF	1.18616	1.04868	1.50492	1.08505	1.37447	1.41665	1.15372	1.17272	1.38369	1.11349	0.966697	1.17785	1.26943	1.18887	1.22087			1.24659	1.29206	1.23671	1.08601	1.22639
APLN	0.371283	0.126725	0.305516	0.374122	0.315695	0.498526	0.398251	0.52271	0.394695	0.552055	0.643578	1.59054	0.436797	0.395067	0.394082			0.267841	0.396114	0.438552	0.928724	0.408649
APLNR	0	0.00740518	0	0.00698579	0	0.0196741	0	0	0	0.0151118	0.175376	0.142971	0.0821457	0	0.0269886			0.00246839	0.00888663	0	0.111153	0.0363781
APLP1	0.989924	1.2814	1.26974	1.42142	1.17812	1.37681	1.96359	1.82946	1.55375	1.51202	1.52447	1.56128	1.24243	1.72339	1.5308			1.18035	1.32545	1.78227	1.53259	1.49887
APLP2	141.873	142.792	144.34	141.71	140.89	138.898	144.334	127.234	147.87	175.61	169.711	175.56	155.442	154.532	151.67			143.002	140.499	139.813	173.627	153.881
APMAP	54.2363	51.2744	54.7024	44.6189	49.5939	46.8096	52.2849	60.7699	56.1432	60.0968	59.7522	62.2456	64.4124	63.1289	63.6583			53.4044	47.0075	56.3993	60.6982	63.7332
APOA1	0.284558	0.287326	0.030292	0.345158	0.278769	0.471961	0.340888	0.495974	0.171041	0.139713	0.0939067	0.191479	0.146131	0.112029	0.117059			0.200725	0.365296	0.335968	0.1417	0.125073
APOA1BP	31.3716	29.749	29.4661	24.695	27.604	28.7987	30.0313	38.9544	31.9071	33.4448	33.0543	32.9113	33.2188	32.7976	32.3709			30.1956	27.0326	33.6309	33.1368	32.7958
APOA2	0	0	0	0	0	0	0	0	0.103698	0.103858	0	0	0.0171254	0	0			0	0	0.034566	0.0346193	0.00570847
APOA4	0.0285186	0.0227672	0	0.130168	0.0216768	0.034712	0.298063	0.472048	0.267166	0	0.132828	0	0	0.0205796	0.0605			0.0170953	0.0621856	0.345759	0.044276	0.0270265
APOA5	0.0633198	0.0303713	0.0572304	0.0150551	0.0159592	0.0200746	0.0199499	0.0348106	0.0584077	0	0	0	0.0216214	0.0454784	0.0297058			0.0503072	0.0170296	0.0377227	0	0.0322685
APOB	0.0291638	0.0390728	0.0419307	0.0479181	0.0287743	0.0177484	0.050721	0.0277195	0.0497653	0.0598022	0.051166	0.0619405	0.0391149	0.0478423	0.0510667			0.0367224	0.0314803	0.0427353	0.0576362	0.046008
APOBEC1	0	0	0	0	0.00129486	0	0.00161856	0	0.00395764	0.000660623	0	0	0.000921834	0	0			0	0.00043162	0.00185873	0.000220208	0.000307278
APOBEC2	0.00978448	0.0568044	0.00446024	0.0111647	0.0118347	0.00893209	0.00295863	0	0.00241145	0.00241516	0.00284819	0.00230442	0.082047	0.0134828	0.00660612			0.023683	0.0106438	0.00179003	0.00252259	0.0340453
APOBEC3A	0.313839	0.155169	0.365435	0.123928	0.230702	0.19072	0.189719	0.29908	0.149053	0.0739522	0.417833	0.206633	0.411054	0.326772	0.271282			0.278148	0.181783	0.212617	0.232806	0.336369
APOBEC3B	12.3924	12.3307	13.3704	7.35822	9.99185	8.54522	11.4193	14.8595	12.3697	12.7667	12.1474	11.4262	13.9224	12.4979	13.3119			12.6978	8.63176	12.8828	12.1134	13.2441
APOBEC3C	32.6733	32.6229	32.2678	29.9533	31.7546	28.1233	35.3283	34.9853	30.5441	29.8234	31.6129	30.3208	31.0514	31.6684	30.2234			32.5213	29.9437	33.6192	30.5857	30.9811
APOBEC3D	2.70153	3.10111	2.1637	2.52663	2.48326	2.20875	3.2106	2.24832	2.29533	1.77629	2.05569	1.47346	1.98146	1.9625	1.99401			2.65545	2.40621	2.58475	1.76848	1.97932
APOBEC3F	7.383	8.72541	10.118	12.0375	9.59632	10.1331	8.87189	7.61191	8.81672	5.62121	5.54648	6.75639	5.93301	5.486	6.24312			8.74214	10.589	8.43351	5.97469	5.88738
APOBEC3G	10.7765	12.3898	10.199	16.4233	13.8352	15.1518	11.1094	13.3723	10.3399	6.51815	7.84198	6.54325	5.01164	6.4529	6.9297			11.1218	15.1368	11.6072	6.96779	6.13141
APOBEC3H	0.1005	0.158359	0.0609777	0.132497	0.161221	0.131986	0.19796	0.111165	0.098855	0.223577	0	0.0314049	0.070079	0.0996125	0.0976147			0.106612	0.141901	0.135993	0.084994	0.0891021
APOBEC4	0	0	0	0	0	0	0	0	0	0	0	0	0	0	0			0	0	0	0	0
APOBR	0.0636822	0.0454965	0	0.0357588	0.0528177	0.00953497	0.0665201	0	0.0179366	0	0	0.00856999	0.0250677	0.0250719	0.00818929			0.0363929	0.0327038	0.0281522	0.00285666	0.019443
APOC1	24.8668	30.3073	21.5643	20.7636	28.7437	25.3161	14.3308	27.6944	21.6982	28.8704	29.4707	24.3633	21.0903	24.6495	19.4277			25.5795	24.9411	21.2411	27.5681	21.7225
APOC2	0	0.139335	1.41073	0	0.727566	0.180892	0	0.0253568	0	0.137881	0.166384	0.68183	0.0301447	0	0			0.516688	0.302819	0.00845227	0.328698	0.0100482
APOC3	0.343572	0.444876	0.313233	0.94825	0.249944	0.635131	0.831116	1.06561	1.35481	0.678449	0.800098	0.647342	0.477072	0.953154	0.695902			0.367227	0.611108	1.08385	0.70863	0.708709
APOC4	0	0	0	0.793882	0.420177	0	0.508087	0	0	0	0	0	0.0333553	0.022268	0.163202			0	0.404686	0.169362	0	0.0729418
APOD	192.16	211.558	212.997	206.41	217.686	215.591	202.909	253.227	212.391	154.099	179.099	181.398	187.724	192.323	187.728			205.572	213.229	222.842	171.532	189.258
APOE	71.814	82.077	68.787	113.238	109.74	113.057	78.5262	76.2818	71.3828	83.8408	81.1596	79.8326	75.945	70.7676	68.7234			74.226	112.012	75.3969	81.611	71.812
APOF	0	0	0	0	0	0	0.0229113	0	0.018674	0.0357876	0	0	0	0.0174015	0.0326294			0	0	0.0138618	0.0119292	0.016677
APOH	0	0	0.0615611	0	0	0.00198762	0	0	0	0	0	0	0	0	0			0.0205204	0.00066254	0	0	0
APOL1	29.1337	45.0624	29.8383	38.7497	36.1012	37.4917	35.139	26.5693	31.7364	10.5523	15.6724	12.955	9.63455	11.1722	12.8158			34.6781	37.4475	31.1482	13.0599	11.2075
APOL2	47.3253	56.5495	41.6599	50.7179	49.0632	48.3311	45.5981	40.4051	36.9425	27.0666	28.6655	27.3469	20.5567	27.015	25.396			48.5116	49.3707	40.9819	27.693	24.3226
APOL3	6.37328	7.95436	8.46468	5.26797	6.00937	5.91297	7.38356	6.40096	6.13655	2.67832	3.46238	2.54661	2.72553	3.2268	4.31081			7.59744	5.7301	6.64036	2.89577	3.42105
APOL4	0.201304	0.19164	0.084642	0.251026	0.197114	0.07724	0.0675784	0.110884	0.0989792	0.00918402	0.0107427	0.0017075	0.0748038	0.0606655	0.0168511			0.159195	0.175127	0.0924805	0.00721141	0.0507735
APOL5	0.0549741	0.0213412	0.00472216	0.0317484	0.0519645	0.034197	0.0388179	0.0129312	0.0424444	0.0279637	0.0123939	0.0303065	0.00747853	0.0198513	0.00973451			0.0270125	0.0393033	0.0313978	0.0235547	0.0123548
APOL6	12.4836	13.2477	12.2364	14.5869	13.4113	13.7267	13.7043	8.43706	10.8457	6.21706	6.10084	5.00066	4.56034	5.98706	5.49			12.6559	13.9083	10.9957	5.77285	5.3458
APOLD1	0.329018	0.367622	0.361678	0.317663	0.416299	0.300359	0.321404	0.308708	0.20169	0.33296	0.427703	0.483003	0.427154	0.38337	0.45565			0.352773	0.344774	0.277267	0.414555	0.422058
APOM	1.55531	0.801533	0.563192	1.06149	0.928995	1.26346	0.362283	1.15364	1.29723	1.0018	1.16292	2.19624	1.63562	0.737414	1.53579			0.973345	1.08465	0.937718	1.45365	1.30294
APOO	10.4297	10.0249	12.327	8.6017	9.58724	9.66735	10.1525	14.572	13.3987	13.4228	13.1514	13.3411	12.7197	12.8261	12.3838			10.9272	9.28543	12.7077	13.3051	12.6432
APOOL	4.78079	4.77195	4.96209	4.12009	3.95919	4.46439	6.01732	4.61052	4.62737	5.92102	5.52789	5.23954	5.27337	5.29954	5.34006			4.83828	4.18122	5.08507	5.56282	5.30432
APOPT1	31.8628	29.7756	32.1621	28.7843	29.0865	31.7193	26.8317	36.8875	32.1749	35.2431	34.0211	32.2702	33.9665	37.3128	33.5032			31.2668	29.8634	31.9647	33.8448	34.9275
APP	221.976	225.524	212.852	218.883	216.25	215.513	230.794	180.347	220.381	219.665	212.292	214.901	216.8	223.676	219.76			220.117	216.882	210.507	215.619	220.079
APPBP2	10.2661	11.1134	11.2539	10.5896	9.39701	9.64007	9.84633	8.03039	9.97663	12.0525	10.6131	11.2404	10.3495	11.0576	10.6844			10.8778	9.87556	9.28445	11.302	10.6972
APPL1	10.9933	10.2727	12.1231	9.97154	9.86746	9.18537	9.77351	7.37857	11.3866	15.3564	14.1838	13.7156	12.751	12.7569	11.9176			11.1297	9.67479	9.51289	14.4186	12.4752
APPL2	68.0171	64.9406	66.8483	50.8009	52.9566	53.2035	60.1663	64.5791	65.2449	59.1052	58.5088	57.4045	69.0373	65.3367	63.9259			66.602	52.3203	63.3301	58.3395	66.1
APRT	140.724	140.526	133.62	126.166	136.432	140.308	156.561	173.862	147.815	155.372	166.237	152.017	161.725	149.831	161.932			138.29	134.302	159.413	157.875	157.829
APTX	16.758	15.937	17.1621	14.1831	15.7802	15.6378	17.2979	19.0185	18.6019	18.7728	18.9271	17.073	19.2008	20.7633	19.7104			16.619	15.2004	18.3061	18.2576	19.8915
AQP1	26.1773	23.6294	21.2163	17.9798	21.3967	22.227	25.7942	22.1106	22.341	24.3117	21.7578	24.9739	14.1021	13.2537	15.4964			23.6743	20.5345	23.4153	23.6811	14.2841
AQP10	0.131272	0.00670725	0	0.102908	0	0	0.00838378	0	0.0524129	0	0	0	0.0047749	0.0367888	0			0.0459931	0.0343027	0.0202656	0	0.0138546
AQP11	0.796706	0.556216	0.597214	0.623412	0.600469	0.528739	0.564901	0.567198	0.552341	0.966672	0.502618	0.436514	0.718082	0.426951	0.607731			0.650045	0.584207	0.56148	0.635268	0.584255
AQP12A	0	0	0	0	0	0	0.0132052	0.00242136	0.0315412	0	0	0	0.00150418	0.00200592	0			0	0	0.0157226	0	0.00117003
AQP12B	0	0	0	0	0	0	0.0130021	0.0223688	0	0	0	0	0.00105788	0.00466773	0			0	0	0.0117903	0	0.00190854
AQP2	0	0	0	0	0	0	0	0.00784123	0	0	0	0	0.00487101	0	0			0	0	0.00261374	0	0.00162367
AQP3	0.30573	0.459111	0.890237	0.761	0.490422	0.755047	3.19967	3.62796	3.21547	10.2929	10.3194	12.2371	0.712254	0.722846	0.79456			0.551693	0.668823	3.3477	10.9498	0.74322
AQP4	0	0	0	0	0	0	0	0	0	0	0	0	0	0	0			0	0	0	0	0
AQP5	0	0	0	0.0158394	0	0.00858944	0	0.105687	0.0173718	0.0139351	0	0	0.00486126	0.0158222	0			0	0.00814295	0.0410196	0.00464503	0.00689449
AQP6	0	0	0	0	0	0	0.0138801	0	0.00675986	0	0	0.0108109	0.0601886	0.0105422	0			0	0	0.00687999	0.00360363	0.0235769
AQP7	0.004818	0.00777022	0.0117135	0.0288204	0.00777006	0.00586436	0.00194249	0.0955608	0.00158324	0.18631	0.123537	0.0810962	0.0451407	0.00147536	0.005783			0.00810057	0.0141516	0.0330288	0.130314	0.0174664
AQP8	0.00475721	0.134139	0	0.214925	0.0943404	0.0943149	0.00287697	0.00527525	0	0	0.0911094	0.0326302	0.0463896	0.0789348	0.13468			0.0462987	0.134527	0.00271741	0.0412465	0.0866681
AQP9	19.58	18.4424	19.7938	11.8079	13.7268	12.8366	18.8116	23.0932	21.4426	10.8181	10.1344	9.78693	19.8937	18.9003	18.0147			19.2721	12.7904	21.1158	10.2465	18.9362
AQR	11.7315	10.5407	11.1777	9.82851	10.2422	9.75932	10.4651	9.02858	11.1725	12.4756	12.4533	12.5692	12.6553	12.7258	12.4643			11.15	9.94334	10.2221	12.4994	12.6151
AR	3.9975	3.80126	4.7006	3.27334	3.496	3.83401	4.07276	3.2058	4.49699	4.10758	4.62526	4.22332	4.29599	3.92086	4.13758			4.16645	3.53445	3.92518	4.31872	4.11814
ARAF	22.0278	22.7692	24.0061	24.9468	25.3673	23.5381	27.5433	26.2837	21.4346	23.7398	26.9458	26.6555	24.9411	24.0262	24.5577			22.9344	24.6174	25.0872	25.7804	24.5083
ARAP1	12.5643	12.4521	12.4094	12.5488	11.509	12.6932	13.408	9.99618	12.0484	11.4619	11.1842	10.8942	11.9627	11.5548	11.6157			12.4753	12.2503	11.8175	11.1801	11.7111
ARAP2	0.00992864	0.027725	0.0357921	0.078978	0.0612227	0.0765269	0.0347185	0.0304741	0.0309637	0.00387619	0.0232821	0.0191018	0.0616522	0.0505449	0.0884083			0.0244819	0.0722425	0.0320521	0.01542	0.0668685
ARAP3	3.16279	2.97651	2.77577	2.34522	2.6431	2.15948	2.95475	2.65555	3.0457	3.08611	3.11671	3.04932	3.4907	3.33062	3.20699			2.97169	2.3826	2.88533	3.08405	3.34277
ARC	1.14568	1.3823	0.9618	1.22801	1.22973	1.26412	7.66505	6.83931	6.16555	0.654924	0.725043	0.782969	1.00135	0.975159	1.07652			1.16326	1.24062	6.88997	0.720979	1.01768
ARCN1	79.2633	76.4626	78.7394	73.5729	74.5091	71.9176	73.8654	79.112	77.6381	88.5759	82.4331	87.1874	82.0945	84.1841	81.0756			78.1551	73.3332	76.8718	86.0655	82.4514
AREG	19.6188	20.3969	18.8183	48.9618	39.5198	43.4275	20.5323	22.8563	18.6912	11.3864	12.6601	16.2704	22.864	25.3604	20.3401			19.6113	43.9697	20.6933	13.439	22.8548
AREL1	8.79106	8.17544	8.11422	8.11221	7.66888	7.57856	8.36299	7.21577	8.67044	9.04191	8.06683	9.17967	9.4186	9.88344	9.16027			8.36024	7.78655	8.08307	8.7628	9.48744
ARF1	306.949	334.417	304.66	338.148	329.853	334.291	334.631	328.872	304.23	319.644	324.66	330.657	317.586	305.518	319.189			315.342	334.097	322.578	324.987	314.098
ARF3	64.0659	59.2122	70.2695	68.7988	71.9721	69.4088	65.0465	56.3731	63.0297	72.5496	65.9268	63.0387	65.5541	70.1312	67.7848			64.5159	70.0599	61.4831	67.1717	67.8234
ARF4	168.722	173.22	171.619	155.932	159.964	158.559	148.633	191.312	168.079	183.87	171.358	188.584	176.941	184.568	182.518			171.187	158.152	169.341	181.271	181.342
ARF5	51.4818	56.5409	48.5339	60.587	58.7283	57.2253	56.0524	71.1137	58.8075	55.2619	57.5116	57.0601	62.1211	58.9699	61.8538			52.1855	58.8469	61.9912	56.6112	60.9816
ARF6	80.1826	80.9921	77.1094	80.0219	83.1387	80.5323	79.0224	73.1349	69.3926	86.7137	89.3557	87.2993	75.7176	70.4322	74.0337			79.428	81.231	73.85	87.7896	73.3945
ARFGAP1	34.3989	35.838	31.5029	33.6232	33.2407	33.5778	34.1196	31.1824	32.2451	36.2677	35.7077	35.0596	35.26	34.6134	34.1436			33.9133	33.4806	32.5157	35.6783	34.6723
ARFGAP2	18.9212	19.4353	18.3445	17.062	17.3551	18.2554	19.3941	19.0829	18.6145	17.8209	17.7081	18.3956	19.1883	19.9845	19.3583			18.9003	17.5575	19.0305	17.9749	19.5104
ARFGAP3	22.7535	22.6582	22.796	23.7189	22.8093	21.6532	23.2298	21.3736	22.7022	23.6076	23.6533	24.6342	22.7192	23.5211	23.4742			22.7359	22.7271	22.4352	23.965	23.2382
ARFGEF1	8.56333	8.29037	8.35709	7.70301	7.89625	7.41099	8.76347	6.61881	8.7284	9.50275	8.55499	9.42807	9.62186	9.31668	8.95562			8.4036	7.67008	8.03689	9.16194	9.29805
ARFGEF2	7.42604	7.69567	7.54094	6.5181	6.62733	5.98295	6.99507	5.242	7.42482	7.18576	6.73105	7.00599	7.5459	7.68528	7.58968			7.55422	6.37613	6.55396	6.97427	7.60695
ARFGEF3	0.0222946	0.01494	0.016795	0.0250336	0.0223491	0.0324499	0.0215208	0.00212271	0.00898083	0.0132785	0.010359	0.0108197	0.0079123	0.0245818	0.00516976			0.0180099	0.0266109	0.0108748	0.0114857	0.0125546
ARFIP1	15.0908	13.3661	15.9911	11.2627	12.4181	11.2297	14.4829	13.0641	15.7393	15.6264	14.4578	15.3456	16.3929	15.733	15.1214			14.816	11.6368	14.4288	15.1433	15.7491
ARFIP2	25.1848	25.92	22.0964	23.3024	27.6711	26.5182	25.3248	28.2999	24.7985	28.1407	24.9665	29.4543	27.1979	24.4974	27.94			24.4004	25.8306	26.1411	27.5205	26.5451
ARFRP1	25.0346	27.7453	24.1065	25.0987	26.7524	34.6102	30.5714	26.4164	29.3727	25.0755	26.4144	20.7885	22.7245	22.3277	26.1324			25.6288	28.8204	28.7868	24.0928	23.7282
ARG1	0.0384603	0.0343366	0.0234758	0.0075614	0.0251247	0.0111449	0	0.0186848	0.0718521	0.0194767	0.0339636	0.0339005	0.047786	0.0519838	0.0354615			0.0320909	0.0146103	0.030179	0.0291136	0.0450771
ARG2	4.28627	4.25952	3.97904	3.32946	3.39527	3.00711	4.73648	4.33347	4.0607	4.8572	4.54814	4.60904	6.17276	5.66516	5.83556			4.17494	3.24395	4.37688	4.67146	5.89116
ARGLU1	38.1235	40.3226	34.592	37.2897	37.2816	33.4576	32.8096	31.0313	34.7514	34.1492	35.8067	33.7041	39.1342	35.0681	35.7523			37.6794	36.0096	32.8641	34.5533	36.6515
ARHGAP1	30.8973	30.8854	30.621	31.2307	30.3212	31.8588	33.1237	31.515	29.3854	32.5092	30.979	33.595	31.1203	31.8321	31.3508			30.8012	31.1369	31.3414	32.3611	31.4344
ARHGAP10	14.3788	14.0017	14.5856	15.1309	13.4245	14.7212	13.4673	14.4126	14.8324	15.3228	16.4439	15.6813	15.007	14.966	13.9993			14.322	14.4255	14.2374	15.816	14.6574
ARHGAP11A	18.593	17.1719	20.5949	12.0859	13.9177	13.2239	18.0709	14.0606	17.9141	21.9938	20.6954	20.751	22.4428	22.1443	22.9337			18.7866	13.0758	16.6819	21.1467	22.5069
ARHGAP11B	3.62497	3.58427	3.94733	2.3775	2.96515	2.6392	4.33142	1.90634	3.80713	4.78598	4.43113	3.88194	4.8245	4.21242	4.11124			3.71886	2.66062	3.3483	4.36635	4.38272
ARHGAP12	11.9609	11.4753	11.9225	11.9928	10.5925	10.1852	12.4169	9.42719	12.7463	13.0838	11.6576	11.4569	11.9605	11.9253	10.6329			11.7862	10.9235	11.5301	12.0661	11.5062
ARHGAP15	0.000144396	0.104538	0.000165322	0.197239	0.0524134	0.000200279	0.130113	0.000115434	0.106555	8.95198e-05	4.69201e-05	4.11257e-05	0.000105022	0.000174956	9.6735e-05			0.0349492	0.0832842	0.0789278	5.91885e-05	0.000125571
ARHGAP17	20.941	20.3894	20.7009	23.4247	21.8619	22.2893	19.6178	16.7644	20.293	18.0986	18.8368	19.8164	20.7035	20.2489	19.7719			20.6771	22.5253	18.8917	18.9173	20.2414
ARHGAP18	40.7974	38.1208	42.063	30.8206	34.2569	37.0701	38.0992	32.7266	43.3381	42.3947	38.0695	38.9616	43.1387	41.8526	42.7229			40.3271	34.0492	38.0546	39.8086	42.5714
ARHGAP19	3.22821	2.83849	3.45818	2.0697	2.35285	2.37895	2.69715	2.44685	2.60659	3.29801	3.11487	3.15386	4.07656	3.82333	3.5946			3.17496	2.26717	2.58353	3.18891	3.8315
ARHGAP20	0.127635	0.105245	0.171129	0.128691	0.108601	0.0783107	0.105029	0.11016	0.141598	0.0974258	0.228864	0.224896	0.107026	0.103304	0.127317			0.13467	0.105201	0.118929	0.183729	0.112549
ARHGAP21	27.7432	26.4803	26.7442	27.4691	26.447	25.6644	26.6091	18.9219	27.3577	25.4646	25.244	24.7685	25.7445	26.8004	24.7085			26.9892	26.5268	24.2962	25.159	25.7511
ARHGAP22	49.0335	47.2358	43.8803	36.6418	41.5001	42.382	47.0869	41.7032	41.5252	36.1131	36.967	35.3196	51.4679	48.5841	46.7869			46.7165	40.1746	43.4384	36.1332	48.9463
ARHGAP23	20.266	19.7859	18.0058	20.0657	18.7157	18.1601	21.173	14.7661	18.9966	26.1418	26.6699	26.6595	21.2875	19.4906	19.5045			19.3526	18.9805	18.3119	26.4904	20.0942
ARHGAP24	29.1379	29.3947	27.6607	31.6706	28.5217	27.1554	31.1627	27.0502	28.5747	25.0061	21.7609	22.5266	24.9552	28.6189	23.615			28.7311	29.1159	28.9292	23.0979	25.7297
ARHGAP25	0.0509103	0.0297724	0	0.0380114	0.0675514	0.0749003	0.0372143	0.000268274	0	0	0	0	0.0116781	0.0567526	0.055205			0.0268942	0.0601544	0.0124942	0	0.0412119
ARHGAP26	2.43157	2.80313	1.62446	5.01753	3.95487	3.5916	2.34947	1.36844	2.46026	1.52639	1.4074	1.38326	1.15527	1.55149	0.984181			2.28639	4.188	2.05939	1.43902	1.23031
ARHGAP27	0.971674	1.18977	1.00579	2.12218	1.28608	1.59976	1.17557	0.854765	0.720734	0.292583	0.46781	0.532363	0.477065	0.617747	0.473904			1.05574	1.66934	0.917023	0.430919	0.522905
ARHGAP28	0.0105533	0.0101879	0.0523066	0.00104674	0.0373676	0.0503246	0.0127443	0.00129948	0.0498789	0.0313658	0.118261	0.070556	0.102744	0.0467123	0.0619448			0.0243493	0.0295796	0.0213076	0.0733943	0.070467
ARHGAP29	80.9381	75.9043	78.7712	61.4911	65.6899	62.3707	70.1279	55.1631	70.8319	72.1024	64.3958	65.7887	68.3133	69.7047	66.7613			78.5379	63.1839	65.3743	67.429	68.2598
ARHGAP30	0.0571535	0.0854553	0.0285647	0.0718229	0.0740356	0.0168564	0.0700873	0.0969219	0.105638	0.0709245	0.012729	0.0308703	0.0688387	0.048975	0.0700526			0.0570578	0.0542383	0.0908824	0.0381746	0.0626221
ARHGAP31	3.85813	3.84851	3.77887	5.76902	5.1874	4.74282	3.63979	2.65928	3.83133	4.30662	3.63148	4.20036	4.85862	5.05957	4.89818			3.8285	5.23308	3.3768	4.04615	4.93879
ARHGAP32	2.38127	2.44701	2.07053	2.48352	2.46183	2.00966	2.45567	1.40234	2.40944	2.31247	2.12506	2.22199	2.6904	2.72492	2.62861			2.2996	2.31834	2.08915	2.21984	2.68131
ARHGAP33	1.89175	1.98654	1.87935	1.39697	1.22408	1.56451	1.89892	1.8927	1.55933	1.79044	1.84383	1.90419	2.79306	1.79345	2.17991			1.91921	1.39519	1.78365	1.84615	2.25547
ARHGAP35	36.1984	31.8642	35.7428	33.4603	31.8912	30.447	33.4545	19.0473	34.2399	33.0303	33.0042	30.784	34.9476	35.1286	35.1248			34.6018	31.9328	28.9139	32.2728	35.067
ARHGAP36	0	0	0	0	0	0	0	0	0	0	0	0	0	0	0			0	0	0	0	0
ARHGAP39	1.14492	1.16546	1.25969	1.17401	1.15336	1.38837	0.976495	0.890951	0.994845	0.984321	0.976467	1.20001	1.20076	0.82456	0.927858			1.19002	1.23858	0.954097	1.0536	0.984393
ARHGAP4	0.151086	0.202943	0.158597	0.437903	0.282745	0.262211	0.215717	0.292843	0.253378	0.0672902	0.107109	0.0642242	0.234795	0.281225	0.129658			0.170875	0.32762	0.253979	0.0795411	0.215226
ARHGAP40	0.146221	0.0847311	0.144295	0.331053	0.219453	0.271389	0.135693	0.0977967	0.0859634	0.140386	0.0757813	0.139818	0.114189	0.13503	0.130569			0.125082	0.273965	0.106484	0.118662	0.126596
ARHGAP42	0.922257	0.714626	1.15502	0.996723	0.877488	1.0083	0.801076	0.467886	0.849426	0.958058	0.869233	0.89063	0.975623	0.884284	0.81555			0.930634	0.960837	0.706129	0.905974	0.891819
ARHGAP44	0.257473	0.339789	0.29123	0.289575	0.335704	0.18729	0.344261	0.307872	0.391043	0.34971	0.354498	0.325892	0.42885	0.367885	0.458485			0.296164	0.270856	0.347725	0.343367	0.418407
ARHGAP5	10.2223	9.56433	10.792	11.4648	10.0497	8.61934	8.32178	5.78845	9.9975	9.79234	9.01386	8.8253	8.54225	8.91949	8.55995			10.1929	10.0446	8.03591	9.2105	8.6739
ARHGAP6	2.16222	2.35729	2.46987	1.74242	1.71048	1.516	2.1426	1.85442	2.66212	1.97663	1.8765	2.0247	2.41823	2.19411	2.41361			2.32979	1.6563	2.21971	1.95928	2.34198
ARHGAP8	0	0.0322854	0	0.106932	0.0105783	0	0.0954391	0	0.0209486	9.34887e-43	0.0459383	0.0371678	0	0	0			0.0107618	0.0391701	0.0387959	0.027702	0
ARHGAP9	0.0850277	0.0791606	0.0751602	0.118902	0.0366142	0.0975455	0	0.00270919	0.0342044	0.0197808	0.0522827	0.0211723	0.0500761	0.0942777	0.129603			0.0797828	0.0843539	0.0123045	0.0310786	0.0913189
ARHGDIA	284.012	294.774	270.837	254.309	267.327	284.208	289.222	299.418	263.737	254.984	268.477	262.972	292.59	274.442	283.753			283.208	268.615	284.126	262.144	283.595
ARHGDIB	1.83628	1.99161	1.47073	1.32203	1.61479	1.38801	1.88451	1.94387	1.75548	2.32615	1.39257	1.83416	2.37891	2.30013	2.30398			1.76621	1.44161	1.86129	1.85096	2.32767
ARHGDIG	0.981233	1.34597	1.27077	2.39513	1.66843	1.7056	1.12271	1.78816	1.37161	1.22337	0.790951	1.18741	0.92604	1.15837	0.966015			1.19932	1.92305	1.42749	1.06724	1.01681
ARHGEF1	71.6525	70.0191	69.4353	62.3796	70.6	69.8035	73.5387	64.4636	67.3653	67.3937	70.2784	66.1611	73.4064	71.196	72.9688			70.369	67.5944	68.4559	67.9444	72.5237
ARHGEF10	9.63268	9.26771	7.91756	8.29407	8.31927	7.70552	9.49485	7.46995	8.63421	9.41836	8.63889	8.62524	9.75143	9.52129	9.23619			8.93932	8.10629	8.533	8.89416	9.50297
ARHGEF10L	6.69262	6.68183	5.42126	6.28826	5.91325	6.01706	7.82042	5.77948	6.51704	5.54883	6.40975	5.8593	6.42027	6.07667	6.44238			6.26524	6.07286	6.70565	5.93929	6.31311
ARHGEF11	7.10438	6.3867	6.49097	6.29321	6.38615	6.48289	6.74325	5.74323	6.77951	7.26738	7.37902	7.76009	7.2906	7.08878	7.14385			6.66068	6.38742	6.422	7.46883	7.17441
ARHGEF12	17.5348	15.513	17.4896	17.7087	16.5834	15.3515	18.1891	12.3548	17.6241	19.9819	17.7948	18.9807	19.1619	19.4025	17.9882			16.8458	16.5479	16.056	18.9191	18.8509
ARHGEF15	0	0.0268787	0	0.00844939	0	0.00283236	0	0	0	0	0	0	0.0257336	0.0948911	0.0416448			0.00895957	0.00376058	0	0	0.0540898
ARHGEF16	0	0.0141273	0	0	0.0570677	0.0127881	0.153114	0.0945713	0.0538724	0	0.0169993	0	0.0365438	0.000980303	0.00192126			0.0047091	0.0232853	0.100519	0.00566643	0.0131485
ARHGEF17	6.57039	6.28426	6.4084	6.35557	5.7458	6.08447	8.01381	5.66647	6.98576	6.58074	6.52558	6.92339	7.53974	6.61578	7.1728			6.42102	6.06195	6.88868	6.67657	7.10944
ARHGEF18	7.34479	7.72963	6.80336	8.2948	8.2238	7.7406	7.12995	5.40382	6.37591	6.3192	6.50699	6.37292	6.30519	6.09932	6.57983			7.29259	8.0864	6.30323	6.3997	6.32811
ARHGEF19	1.84155	2.26686	1.80233	2.16427	2.03649	2.25999	2.1516	2.33291	2.02724	1.49821	1.85806	1.82612	1.79854	1.80043	1.71746			1.97025	2.15358	2.17058	1.72746	1.77214
ARHGEF2	20.354	22.4577	19.5573	25.072	22.9743	22.3975	20.2871	16.5194	19.2129	24.1163	23.2204	24.8013	15.9979	16.1657	17.1261			20.7897	23.4813	18.6731	24.046	16.4299
ARHGEF25	7.68032	7.51311	7.11254	7.00395	7.13128	7.25404	8.23655	8.60758	8.57522	7.71824	7.49833	8.24876	9.2081	8.7173	8.11356			7.43532	7.12976	8.47312	7.82178	8.67965
ARHGEF26	0.611331	0.558668	0.71111	0.49857	0.428137	0.685338	0.759997	0.489452	0.719381	0.867394	0.862547	0.870768	1.01374	0.957456	0.922799			0.627036	0.537348	0.656277	0.866903	0.964665
ARHGEF28	7.65724	6.65037	7.11464	5.39552	5.76496	5.82861	6.55626	6.50827	7.10999	8.40996	7.78118	8.06881	8.25323	8.08025	7.58833			7.14075	5.66303	6.72484	8.08665	7.97394
ARHGEF3	1.49277	1.5937	1.86926	1.70697	1.78226	1.43627	1.9753	1.4451	2.12157	2.53231	2.53122	2.91733	1.92737	2.19264	2.49917			1.65191	1.64183	1.84732	2.66029	2.20639
ARHGEF33	0.143899	0.181465	0.114655	0.167221	0.19813	0.14306	0.0770432	0.0574811	0.0697567	0.075615	0.153496	0.0980133	0.140996	0.174099	0.175548			0.146673	0.16947	0.0680937	0.109041	0.163548
ARHGEF35	1.58619	1.61087	1.38636	1.81028	1.7841	1.8637	1.57083	1.40092	1.69198	1.79633	1.66747	1.63871	1.5713	1.67964	1.56106			1.52781	1.81936	1.55458	1.70084	1.604
ARHGEF37	0.115802	0.219938	0.182528	0.24232	0.203324	0.233099	0.150252	0.104928	0.0795661	0.171233	0.0860636	0.0688728	0.243411	0.31798	0.271268			0.172756	0.226248	0.111582	0.108723	0.277553
ARHGEF38	0.052257	0.0345214	0.0649014	0.0403547	0.0417828	0.0563495	0.046691	0.0518288	0.065156	0.0383457	0.0414627	0.0467006	0.0659917	0.0378208	0.0171928			0.0505599	0.0461623	0.0545586	0.0421697	0.0403351
ARHGEF39	1.09672	0.657463	0.685435	0.344665	0.612961	0.450831	1.12993	1.22459	0.981602	0.84473	0.718838	1.09719	1.54561	1.1071	1.37241			0.813206	0.469486	1.11204	0.886919	1.34171
ARHGEF4	0.403723	0.50534	0.530059	0.47069	0.617337	0.547285	0.667651	0.649776	0.546128	0.602654	0.474245	0.562363	0.406026	0.580597	0.611194			0.479707	0.545104	0.621185	0.546421	0.532606
ARHGEF40	21.5479	22.2367	19.1105	22.7712	22.8912	24.7238	22.0389	18.1808	18.9575	14.3868	15.5077	15.6839	18.1416	17.5112	17.3631			20.965	23.4621	19.7257	15.1928	17.672
ARHGEF5	1.37785	1.49018	1.30425	1.285	1.2529	1.3569	1.61296	0.894061	1.32192	1.50642	1.36888	1.61528	1.36573	1.30898	1.20419			1.39076	1.29827	1.27631	1.49686	1.29297
ARHGEF6	4.84702	4.39694	5.36251	3.28925	3.56363	3.93196	4.95584	4.05071	4.90734	4.41815	4.55921	4.44939	5.4742	5.10332	4.72723			4.86882	3.59495	4.63796	4.47558	5.10158
ARHGEF7	13.0041	13.1308	12.7201	12.1058	11.2203	11.2872	13.6736	11.7339	13.3571	13.004	12.4109	13.0071	14.0254	14.5069	13.4789			12.9517	11.5378	12.9215	12.8073	14.0037
ARHGEF9	4.475	4.15153	3.28255	3.84101	4.37167	3.94258	4.62269	3.94233	4.48004	3.34199	4.09979	3.96185	4.65745	4.14611	4.28544			3.96969	4.05175	4.34835	3.80121	4.363
ARID1A	7.82386	7.53149	7.62356	8.08593	7.5345	7.44486	8.25717	5.77277	7.81565	7.8488	7.66425	8.23139	8.23141	8.03542	7.93641			7.65964	7.68843	7.28186	7.91481	8.06775
ARID1B	9.23778	8.6616	8.90583	9.29197	8.56513	8.77296	10.038	5.87273	8.61044	9.18293	8.65874	9.30113	8.69501	8.77909	8.76727			8.93507	8.87669	8.17372	9.0476	8.74712
ARID2	2.14008	2.1324	2.29274	2.12608	1.95779	1.94632	2.31819	1.51143	1.96446	2.43893	2.40794	2.03706	2.76719	2.93627	2.39925			2.18841	2.01006	1.93136	2.29464	2.7009
ARID3A	5.16714	5.95173	5.01996	6.07518	6.11369	5.28642	6.12711	4.91212	4.98799	5.57583	5.36256	6.06477	6.22177	5.76755	5.40147			5.37961	5.8251	5.34241	5.66772	5.79693
ARID3B	0.777764	0.708031	0.699373	0.962388	0.922339	0.783002	0.826787	0.688311	0.640749	0.489379	0.552997	0.55598	1.01881	0.869412	0.880738			0.728389	0.889243	0.718616	0.532785	0.922987
ARID3C	0.0175631	0.123758	0.111362	0.13051	0.122293	0.0749073	0.141263	0.0463564	0.0310763	0.00371874	0.0680812	0.0163761	0.160314	0.0881771	0.10832			0.0842277	0.109237	0.0728986	0.029392	0.118937
ARID4A	3.02053	2.6472	2.58873	2.57724	2.75739	2.19166	2.42898	1.86247	2.30596	2.48226	2.39374	2.7329	2.5039	2.61736	3.04069			2.75215	2.50876	2.19914	2.5363	2.72065
ARID4B	8.45898	9.26801	7.8164	10.7694	9.88594	8.44535	6.97484	5.59681	7.48217	7.27551	6.64263	5.90408	6.22482	6.32741	6.36977			8.51446	9.70023	6.68461	6.60741	6.30733
ARID5A	4.18812	4.74232	4.34776	4.80971	5.10956	4.10019	5.0779	5.20947	5.07324	3.66232	4.49636	3.77129	4.92622	3.86014	4.51661			4.42607	4.67315	5.1202	3.97666	4.43432
ARID5B	16.4811	15.0208	15.513	14.7372	14.5803	13.2801	13.8271	12.6639	14.1834	16.3875	16.2942	16.5332	16.5499	15.809	13.7225			15.6716	14.1992	13.5581	16.405	15.3605
ARIH1	16.0017	15.8732	14.9513	16.6454	15.2624	16.1175	16.4288	13.7444	15.6054	15.6024	16.7214	15.6585	15.011	16.3513	17.3372			15.6087	16.0084	15.2595	15.9941	16.2332
ARIH2	27.792	26.2758	23.8516	27.8182	29.3038	29.2387	26.0662	20.7333	24.8377	24.9733	26.0043	24.3174	25.2682	25.1079	25.1283			25.9731	28.7869	23.8791	25.0983	25.1681
ARIH2OS	0.479558	0.335102	0.332479	0.570826	0.46528	0.61754	0.646543	0.211608	0.221925	0.279592	0.148302	0.237645	0.341154	0.387577	0.3979			0.38238	0.551215	0.360025	0.221846	0.375544
ARL1	60.9884	62.233	70.4708	61.2298	60.907	59.6644	61.7122	66.4745	61.7615	77.6972	67.4803	67.8887	64.6303	65.1752	63.0619			64.5641	60.6004	63.3161	71.0221	64.2891
ARL10	2.5125	2.16499	2.11358	2.32576	2.24916	2.08879	2.18154	0.845318	1.79101	2.73066	2.01261	2.02351	2.71363	2.68447	2.23039			2.26369	2.22124	1.60596	2.25559	2.54283
ARL11	0.00790457	0	0	0	0.00764869	0.00962123	0.0882411	0	0.0155852	0.00780453	0	0.0148934	0.0072106	0.0145232	0			0.00263486	0.00575664	0.0346088	0.00756598	0.0072446
ARL13A	0.0648442	0.0294363	0.0279427	0.0963317	0.0537699	0.0230583	0.0249113	0.0263794	0.0284325	0.0264676	0.306226	0.0256514	0.0733353	0.0508472	0.0824749			0.0407411	0.05772	0.0265744	0.119448	0.0688858
ARL13B	6.03507	4.7908	5.47886	5.57416	5.35506	5.77166	4.84067	3.99801	4.80756	5.48273	5.73337	5.92503	5.10857	5.39852	5.09291			5.43491	5.56696	4.54875	5.71371	5.2
ARL14	0	0	0	0	0	0.0315722	0.0891079	0	0.0767137	0	0	0	0	0	0			0	0.0105241	0.0552739	0	0
ARL14EP	15.5261	13.7395	12.1207	12.5971	12.2965	12.324	12.8021	14.7135	15.5221	13.8093	12.7735	14.8151	15.3405	13.5732	15.3272			13.7954	12.4059	14.3459	13.7993	14.747
ARL14EPL	14.7326	13.7463	15.4785	12.9196	14.3742	14.2505	13.3025	20.7146	14.6461	15.063	15.1644	17.3478	16.3199	17.1402	16.6115			14.6525	13.8481	16.2211	15.8584	16.6905
ARL15	3.4387	3.76121	4.06303	2.14042	2.90353	2.74607	5.30309	4.38208	3.65001	4.6338	4.04568	5.75175	5.89897	6.3064	4.87559			3.75431	2.59667	4.44506	4.81041	5.69365
ARL16	19.3735	20.1721	17.53	18.4824	19.6172	17.7086	19.5545	21.588	18.8997	20.4698	20.2351	20.7	21.7002	19.8834	22.202			19.0252	18.6027	20.0141	20.4683	21.2619
ARL17A	5.42326	5.13129	8.00121	7.11484	6.20709	7.74018	6.39867	7.44342	5.8917	8.20806	9.50257	7.11089	7.68627	8.45222	11.1083			6.18525	7.0207	6.57793	8.27384	9.08226
ARL17B	4.76715	4.60581	4.96992	3.7364	4.74709	5.68517	4.92373	4.47294	4.32235	5.75712	5.8187	5.34673	5.10631	5.29127	5.93877			4.78096	4.72289	4.57301	5.64085	5.44545
ARL2	56.5664	61.566	55.2477	58.1285	58.3001	64.6105	69.1998	74.0577	64.6748	53.4546	61.1808	59.2746	57.8046	58.8655	55.1173			57.7934	60.3464	69.3108	57.97	57.2625
ARL2BP	45.7647	43.1635	48.1642	38.2239	39.9501	38.8265	43.9004	47.7624	41.357	45.7129	53.0131	53.9644	46.625	52.8746	48.6053			45.6975	39.0002	44.3399	50.8968	49.3683
ARL3	33.7526	32.8751	29.8197	24.5868	29.9174	28.6199	32.419	39.9175	33.7173	36.926	37.5741	41.132	43.384	42.314	43.5229			32.1491	27.708	35.3513	38.544	43.0736
ARL4A	8.33188	9.75305	7.12662	7.83767	8.24781	8.16217	9.06908	11.1241	8.5332	7.70059	8.10017	8.5009	9.2842	10.8367	9.06467			8.40385	8.08255	9.57546	8.10055	9.72852
ARL4C	4.80627	3.15112	3.42416	3.83865	4.13859	3.11869	3.76449	3.43354	3.1468	1.99608	2.42746	1.95605	3.25125	3.3096	2.97044			3.79385	3.69864	3.44828	2.12653	3.1771
ARL4D	14.857	17.0741	16.8207	15.9979	15.9943	16.5442	12.8127	15.5468	11.7993	18.1923	17.0502	18.0152	14.1939	12.8757	13.6862			16.2506	16.1788	13.3863	17.7526	13.5853
ARL5A	24.0049	20.0888	24.6186	21.483	20.9546	18.1628	24.0208	22.8129	23.2773	23.8508	22.7209	23.6862	26.2757	24.69	22.3366			22.9041	20.2001	23.3703	23.4193	24.4341
ARL5B	7.47877	8.39576	6.39508	10.2686	7.28099	7.27011	7.80375	5.05576	8.09314	4.55979	6.23481	4.83671	4.81494	5.86707	5.00271			7.4232	8.27323	6.98422	5.21044	5.22824
ARL5C	0.00155008	0.0119995	0.0056528	0.00565994	0	0.0113203	0.0037497	0.0423898	0.0217755	0	0	0.00292057	0	0.0351098	0.00279082			0.00640079	0.00566008	0.0226383	0.000973523	0.0126335
ARL6	3.98676	2.85592	4.58665	2.61521	3.2831	2.48581	3.14871	3.69981	3.70429	4.23173	4.6815	4.98915	4.43531	4.72276	3.52266			3.80978	2.79471	3.5176	4.63413	4.22691
ARL6IP1	46.807	46.443	46.9945	37.3904	39.7521	39.4444	41.7419	47.6542	47.3422	53.5069	54.9571	53.1276	57.2702	59.1864	57.5707			46.7482	38.8623	45.5794	53.8639	58.0091
ARL6IP4	74.9072	72.1296	69.3157	66.9784	70.2455	79.7049	75.8001	81.9871	70.1897	71.0946	68.7327	68.1271	71.6022	72.9941	74.9354			72.1175	72.3096	75.9923	69.3181	73.1772
ARL6IP5	88.7611	85.5037	93.9117	82.9937	80.0019	75.0979	79.1885	87.5917	79.4928	79.1128	76.6041	75.4986	82.4534	76.4706	81.1126			89.3922	79.3645	82.091	77.0718	80.0122
ARL6IP6	22.2316	20.7481	19.5908	18.7934	17.9634	18.3352	20.1409	19.9943	19.7149	17.6498	19.1458	19.7494	22.0484	20.3825	18.598			20.8568	18.364	19.95	18.8483	20.343
ARL8A	17.8209	22.0651	17.86	24.8311	23.9121	20.2344	20.7932	18.0791	17.876	20.3066	20.4218	19.2409	16.8618	19.0032	20.2945			19.2487	22.9925	18.9161	19.9898	18.7198
ARL8B	39.6694	39.9745	39.9932	41.194	38.522	36.4919	34.4145	40.6952	36.245	33.189	33.4305	33.9406	34.3276	35.9917	35.9429			39.879	38.736	37.1182	33.52	35.4207
ARL9	1.47889	1.77709	1.7639	1.69802	1.61202	2.05772	1.67917	1.57204	1.44717	1.14326	0.79644	1.33194	2.11173	1.47447	2.07094			1.67329	1.78925	1.56613	1.09055	1.88571
ARMC1	12.8018	13.4786	13.7976	10.9901	12.0921	10.9972	12.3452	12.6121	15.4028	16.3497	13.5556	14.926	16.0893	15.3283	14.7887			13.3593	11.3598	13.4534	14.9438	15.4021
ARMC10	22.5484	20.548	22.7516	22.1679	20.0012	19.1387	19.8865	24.5484	23.1681	24.8889	23.2703	24.0053	21.8598	23.9299	23.2881			21.9493	20.4359	22.5343	24.0548	23.0259
ARMC12	0.727027	0.832389	0.985492	1.43403	0.498887	0.704154	0.913134	0.827745	1.00275	1.19862	1.07622	1.19958	1.18467	1.24837	1.28053			0.848303	0.879024	0.914543	1.15814	1.23786
ARMC2	1.17028	1.17295	0.927876	1.11615	1.38802	0.960451	1.27706	1.14797	0.990883	1.39366	1.22879	1.31254	1.46448	1.00536	1.3696			1.09037	1.15487	1.13864	1.31166	1.27981
ARMC3	0.0152247	0	0.000464451	0.0279299	0	0	0.000308087	0.0106313	0.000251108	0	0	0.000479925	0.00822431	0.0228512	0.0228512			0.00522972	0.00930997	0.00373017	0.000159975	0.0179756
ARMC4	0.370338	0.25952	0.224622	0.283397	0.2314	0.235597	0.16229	0.251833	0.310319	0.371807	0.314865	0.418324	0.358846	0.305137	0.252065			0.284827	0.250131	0.241481	0.368332	0.305349
ARMC4P1	0.000957992	0.0532088	0.00106327	0.0996633	0.000193457	0.00102916	0	0.18055	0	0.0536027	0.0651505	0.000549346	0.000334749	0.0487273	0.0994294			0.01841	0.0336286	0.0601833	0.0397675	0.0494971
ARMC5	2.25639	2.78981	2.65102	2.55476	2.88881	2.8829	2.69673	2.52108	2.50959	2.48904	2.29839	2.66272	3.39568	3.20202	3.15427			2.56574	2.77549	2.5758	2.48338	3.25066
ARMC6	23.5527	23.4167	21.8846	21.0546	22.5074	22.6056	25.0385	22.3679	21.1974	22.8043	22.5196	22.486	23.2704	23.8799	25.5102			22.9513	22.0559	22.8679	22.6033	24.2202
ARMC7	4.47317	3.0456	3.5447	2.61399	2.79873	2.69404	5.96897	3.16774	3.22088	3.95672	3.92491	2.63641	2.7421	3.15201	3.63681			3.68782	2.70225	4.1192	3.50601	3.17697
ARMC8	22.7595	20.5858	22.9427	17.7956	19.9703	20.3189	21.401	17.8116	22.9966	23.8251	21.1471	24.2905	22.3298	22.6825	22.1562			22.096	19.3616	20.7364	23.0876	22.3895
ARMC9	13.2716	11.6018	13.707	14.4068	13.2143	14.1388	11.6931	12.546	11.9179	18.1607	17.4824	16.6379	15.8208	16.6366	15.0822			12.8601	13.92	12.0523	17.427	15.8465
ARMCX1	17.8373	18.8725	20.6448	19.1546	17.7295	18.0999	18.2234	21.6046	17.9077	22.0841	20.3223	20.7519	15.8333	17.1623	16.1009			19.1182	18.328	19.2452	21.0528	16.3655
ARMCX2	17.0867	17.0573	16.8184	15.7239	16.749	16.2897	15.9137	16.484	15.8738	21.1792	19.2809	18.8614	17.6321	17.9767	17.853			16.9875	16.2542	16.0905	19.7738	17.8206
ARMCX3	21.9524	22.9231	21.0964	23.9055	23.2202	21.8397	19.4941	20.2511	22.5165	24.4452	20.9364	21.8605	21.3959	20.0239	20.7153			21.9906	22.9885	20.7539	22.414	20.7117
ARMCX4	2.10853	1.93287	2.19047	2.08449	1.95739	1.64966	2.03203	1.21819	1.69114	2.14428	1.94672	1.85212	2.4008	2.02101	2.3128			2.07729	1.89718	1.64712	1.98104	2.24487
ARMCX5	4.60689	4.35773	4.17457	4.44636	4.40245	4.23759	3.948	4.46657	4.2226	4.16128	3.99183	3.99363	3.79943	4.2834	4.71897			4.37973	4.36213	4.21239	4.04891	4.26727
ARMCX5-GPRASP2	0.858789	2.09101	1.77822	1.13566	1.16041	0.964992	1.31301	1.72713	0.870637	1.31815	1.5655	1.15827	1.40366	0.866637	1.45737			1.57601	1.08702	1.30359	1.34731	1.24256
ARMCX6	22.0113	19.87	23.1218	24.4911	21.9303	23.4039	21.3946	24.3033	20.2137	20.8795	21.2627	20.2027	19.2159	19.2247	19.2565			21.6677	23.2751	21.9705	20.7816	19.2324
ARMS2	0.0466613	0.0441436	0	0.042836	0	0	0	0	0.0459999	0	0.0131685	0	0.0312347	0.0519517	0			0.0302683	0.0142787	0.0153333	0.0043895	0.0277288
ARMT1	16.9968	15.8793	19.1795	16.7907	15.4919	17.6231	18.0065	18.8925	18.4855	18.3767	20.2168	19.4956	18.7027	19.305	19.798			17.3519	16.6352	18.4615	19.363	19.2686
ARNT	10.4536	10.3086	9.47959	10.0104	9.59837	10.3957	10.5398	8.2077	10.2323	11.8177	11.1659	12.0303	10.864	10.1835	10.827			10.0806	10.0015	9.65993	11.6713	10.6248
ARNT2	2.50536	2.15027	2.34811	1.62474	1.91021	2.04177	2.14128	1.96769	2.06406	2.72304	2.5363	2.38504	2.8451	2.63456	2.47874			2.33458	1.85891	2.05768	2.54813	2.6528
ARNTL	4.96315	5.38067	5.12028	5.82319	4.99195	5.299	4.36351	4.41575	4.61844	3.80404	3.59154	4.21539	5.15728	4.76699	4.05642			5.1547	5.37138	4.4659	3.87032	4.66023
ARNTL2	10.1031	10.3409	10.683	8.38224	9.00744	7.38691	9.00049	8.08087	10.8374	7.86061	6.92769	7.93739	10.813	10.3429	11.2001			10.3757	8.25886	9.30625	7.57523	10.7853
ARPC1A	96.0959	92.3938	95.6324	82.0784	87.57	90.1043	97.6495	105.667	94.3534	112.354	104.97	107.824	109.931	108.365	109.433			94.7074	86.5842	99.2233	108.383	109.243
ARPC1B	141.284	153.151	137.262	156.606	155.009	161.481	148.406	158.372	137.46	129.302	139.646	137.255	142.34	140.769	138.108			143.899	157.699	148.079	135.401	140.406
ARPC2	344.514	356.14	351.111	340.602	341.208	347.328	357.394	399.236	341.43	333.181	328.271	358.706	378.344	386.505	375.711			350.588	343.046	366.02	340.053	380.187
ARPC3	161.236	159.307	163.577	160.483	163.111	153.508	153.04	206.625	173.088	173.225	168.949	176.35	163.763	170.361	176.945			161.373	159.034	177.584	172.841	170.356
ARPC4	126.394	122.275	116.249	119.403	118.539	113.842	120.516	127.11	123.163	118.29	115.387	111.177	115.923	120.77	118.441			121.639	117.261	123.596	114.951	118.378
ARPC4-TTLL3	2.21667	2.02485	1.66685	2.83228	1.75013	2.71689	2.39294	2.1676	1.33201	1.70633	1.68046	1.52732	2.0356	1.93948	2.02509			1.96946	2.4331	1.96418	1.63804	2.00006
ARPC5	98.7783	101.291	101.483	93.2777	93.5792	98.2122	98.374	115.431	107.21	102.008	99.8531	104.743	100.068	109.058	103.663			100.517	95.023	107.005	102.201	104.263
ARPC5L	56.8913	50.9467	51.7568	55.3195	57.3477	56.2596	57.1183	65.9027	55.8986	55.3108	54.8076	61.016	56.2734	57.9812	58.8855			53.1983	56.3089	59.6399	57.0448	57.7134
ARPIN	5.12482	4.66556	4.76417	3.9272	3.8801	4.10871	6.54774	3.9367	5.71845	5.48967	6.6178	6.36888	9.37719	5.42602	7.27462			4.85152	3.972	5.40096	6.15878	7.35928
ARPP19	37.3267	39.0546	42.0309	41.2973	31.3958	36.4289	41.883	31.1075	35.5151	37.5703	34.3357	37.5849	35.4656	34.0925	39.9519			39.4707	36.374	36.1685	36.497	36.5033
ARPP21	0	0	0	0	0	0	0	0	0	0	0	0	0	0	0			0	0	0	0	0
ARR3	0.0297536	0.0270618	0.020628	0.0329874	0.0205624	0.0207239	0.0376518	0.0128719	0.0309186	0.0167922	0.0313475	0.0312661	0.0214761	0.038475	0.0307043			0.0258145	0.0247579	0.0271474	0.0264686	0.0302185
ARRB1	5.89084	5.43689	5.63861	5.18602	4.97573	5.19396	6.09283	4.5372	5.60532	7.3277	6.41115	6.0224	6.3782	6.6056	6.30516			5.65545	5.11857	5.41178	6.58708	6.42965
ARRB2	5.7441	6.29667	6.53133	4.62177	6.16807	5.25898	6.88995	7.42067	6.4736	7.5017	7.40213	6.97633	9.23835	7.75053	7.02213			6.1907	5.34961	6.92807	7.29339	8.00367
ARRDC1	10.5601	12.5538	12.3539	11.2999	10.4346	11.2949	12.6234	12.5426	9.39319	8.43355	10.1731	8.12767	11.1809	10.6435	11.0101			11.8226	11.0098	11.5197	8.91144	10.9448
ARRDC2	4.40703	4.66449	4.55187	6.64125	6.56205	5.6867	5.60458	5.34195	5.09726	4.34975	4.73673	4.696	4.12682	4.02687	4.0231			4.54113	6.29667	5.34793	4.59416	4.05893
ARRDC3	12.8091	16.6094	12.581	25.9804	18.2807	17.2855	9.06907	8.46013	8.16372	5.87798	6.44709	5.81011	5.01405	5.69373	4.88465			13.9998	20.5155	8.56431	6.04506	5.19748
ARRDC4	14.0826	15.1387	13.7696	19.0609	15.9716	15.1628	11.1914	11.6965	12.3996	11.3855	10.5772	12.1514	8.49811	8.82152	9.70176			14.3303	16.7318	11.7625	11.3714	9.00713
ARRDC5	0.0195584	0.00063397	0.00230721	0.00318653	0.0190466	1.49996e-150	0.00314076	0.00530495	0.0193395	0.00128327	0.00203991	0.108434	0.0135092	1.01285e-182	0.00124196			0.00749986	0.00741104	0.00926174	0.0372524	0.00491705
ARSA	25.1224	27.8266	23.1924	28.933	26.0229	26.6932	27.2144	27.1033	23.4674	22.4397	22.5004	23.2692	22.4626	23.5606	23.5268			25.3805	27.2164	25.9284	22.7364	23.1833
ARSB	7.74074	8.85412	8.56053	7.68406	8.31597	7.65783	7.93425	6.81838	8.05478	8.16373	8.81659	8.75844	8.8385	8.74553	8.92493			8.38513	7.88595	7.60247	8.57959	8.83632
ARSD	3.27776	3.33709	2.7994	3.08591	3.1638	3.292	3.48227	2.85226	2.82594	3.80333	3.93903	3.60764	3.48453	3.41444	3.65808			3.13808	3.18057	3.05349	3.78333	3.51902
ARSE	0.723404	0.821127	0.688062	0.64277	0.74102	0.414808	0.892482	0.742235	1.04287	1.00839	1.16878	0.825088	0.893736	1.16708	0.990176			0.744198	0.599533	0.892529	1.00075	1.017
ARSF	0	0	0	0	0	0	0	0	0	0	0	0	0	0	0			0	0	0	0	0
ARSG	2.3017	2.05301	2.0203	2.8722	2.8547	2.35632	2.214	2.07206	1.94828	2.33903	1.94265	2.04165	2.18572	2.15609	1.97565			2.125	2.69441	2.07811	2.10778	2.10582
ARSH	0	0	0	0.00120663	0	0	0	0	0	0	0	0	0.00072846	0	0.00190391			0	0.00040221	0	0	0.000877457
ARSI	1.89366	1.35922	1.53379	1.7064	1.75286	1.88825	2.0841	1.53466	1.82916	7.53866	6.64966	7.5905	2.69084	3.28133	2.94413			1.59556	1.7825	1.81597	7.25961	2.9721
ARSJ	22.2231	21.5632	21.1118	18.5718	19.878	18.7926	22.4338	19.4136	21.8384	21.8002	20.7623	20.1143	22.8452	21.4817	24.0182			21.6327	19.0808	21.2286	20.8923	22.7817
ARSK	6.63033	6.95746	8.475	5.64958	6.23236	7.0455	7.19088	7.31421	7.6074	9.04819	7.78736	8.50075	7.97426	8.6773	8.48788			7.35426	6.30915	7.37083	8.44543	8.37981
ART1	0.0027925	0.00480384	0	0.0160505	0.00200156	0.00377663	0.0070554	0.00137625	0.0033035	0.0251781	0.00867069	0.00187074	0.0236712	0.0160969	0.0227862			0.00253211	0.00727623	0.00391172	0.0119065	0.0208514
ART3	0.183559	0.0719885	0.223637	0.179652	0.167065	0.223735	0.0905201	0.0837804	0.149171	0.0417798	0.084441	0.0630278	0.249573	0.0994838	0.190553			0.159728	0.190151	0.107824	0.0630829	0.17987
ART4	0	0	0.00366869	0	0	0	0	0	0	0	0	0	0.00138602	0	0			0.0012229	0	0	0	0.000462007
ART5	0	0	0	0.0550132	0.0396947	0	0.00942562	0.133703	0.0646306	0.316552	0.176945	0.0207045	0	0	0.00701527			0	0.0315693	0.0692531	0.1714	0.00233842
ARTN	0.3093	0.235351	0.316305	0.291324	0.211413	0.209843	0.189551	0.116908	0.146879	0.114721	0.128331	0.108151	0.348213	0.330774	0.20909			0.286985	0.237527	0.151113	0.117068	0.296026
ARV1	11.1612	9.77796	10.8097	8.36423	8.91677	10.2479	10.8586	13.1939	11.6681	11.7865	12.206	13.0147	12.5664	13.5003	13.2149			10.583	9.1763	11.9069	12.3357	13.0939
ARVCF	0.952827	0.637992	0.546705	0.832063	0.633125	0.765724	1.19664	1.07032	0.840024	0.499045	0.776504	0.493859	0.686512	0.784081	0.511723			0.712508	0.743637	1.03566	0.589803	0.660772
ARX	0	0	0	0	0.00225614	0.0230567	0	0	0.0103726	0	0	0	0	0	0.00947184			0	0.00843761	0.00345753	0	0.00315728
AS3MT	1.0814	1.13669	1.01416	0.965337	1.07183	0.781395	0.820949	1.33339	0.866527	1.73511	1.36309	1.25101	1.19988	1.44703	1.45789			1.07742	0.939521	1.00696	1.44974	1.36827
ASAH1	21.0909	19.8451	20.3367	20.5607	20.9013	18.6837	19.2788	22.0736	22.334	20.3258	22.7533	21.2563	21.2448	23.6007	20.8692			20.4242	20.0486	21.2288	21.4451	21.9049
ASAH2	0.720753	0.679435	0.647518	0.762924	0.461442	0.541514	0.678261	0.634405	0.766336	0.709494	0.615451	0.586623	0.64922	0.752685	0.688573			0.682569	0.588627	0.693001	0.637189	0.696826
ASAH2B	3.43749	3.53867	2.94212	3.39982	2.6301	2.8844	3.35918	3.58915	3.82468	3.98903	3.3981	3.50065	2.66675	3.38417	3.45206			3.30609	2.97144	3.591	3.62926	3.16766
ASAP1	37.4388	36.129	35.4018	37.3201	34.8492	32.8903	36.2723	30.5971	36.3277	36.2708	34.4512	35.1562	37.4595	36.9804	36.9384			36.3232	35.0199	34.399	35.2927	37.1261
ASAP2	16.6806	15.4696	14.8715	15.0683	13.589	13.1832	17.3146	13.8253	15.9512	17.0452	15.44	15.61	15.9302	15.956	15.8928			15.6739	13.9468	15.697	16.0317	15.9263
ASAP3	2.08349	2.14657	2.18506	2.21881	1.96247	2.14343	2.28586	1.80092	1.94726	2.08664	2.27019	2.02	1.92174	1.90276	2.01893			2.13837	2.10824	2.01135	2.12561	1.94781
ASB1	19.8045	20.7425	18.8608	19.6336	18.9598	19.2016	19.9836	18.1657	17.8634	17.4671	16.8469	16.2261	19.6966	18.3222	21.5167			19.8026	19.265	18.6709	16.8467	19.8452
ASB10	0.00471015	0	0.00429423	0.0220649	0.00455768	0	0.0626846	0.00261153	0.00464339	0	0	0	0.00324468	0.0679426	0.0233255			0.00300146	0.00887419	0.0233132	0	0.0315043
ASB11	0	0.0320756	0	0.00128813	0.0106874	0	0	0	0	0	0	0	0.000972074	0.00259264	0.00254061			0.0106919	0.00399184	0	0	0.00203511
ASB12	0	0	0	0	0	0	0	0	0	0	0	0	0	0	0			0	0	0	0	0
ASB13	5.90759	5.58944	6.21855	4.6258	4.70784	4.97193	5.97553	6.66354	6.49256	5.78245	5.27234	5.57315	7.04442	6.62633	6.8772			5.90519	4.76852	6.37721	5.54265	6.84932
ASB14	0.16226	0.205627	0.221636	0.168774	0.124947	0.0966005	0.155258	0.102042	0.104556	0.136081	0.201211	0.128543	0.174619	0.107688	0.240015			0.196508	0.130107	0.120619	0.155278	0.174107
ASB15	0.000406283	0.000384533	0.000724597	0.000786723	0.000805036	0.00145108	0	0.00132198	0.00119456	0	0	0.0112332	0.00698183	0.00147468	0			0.000505138	0.00101428	0.000838847	0.0037444	0.00281884
ASB16	0.446912	0.34929	0.300885	0.353924	0.342128	0.297093	0.295223	0.38503	0.400358	0.342823	0.380273	0.340867	0.355229	0.306339	0.393034			0.365696	0.331048	0.360204	0.354654	0.351534
ASB17	0	0	0	0	0	0	0	0	0	0	0	0	0.000724558	0	0			0	0	0	0	0.000241519
ASB18	0	0.000392461	0	0	0.000784905	0	0.00049056	0	0	0	0.000472248	0.000382087	0.000279393	0.000372589	0			0.00013082	0.000261635	0.00016352	0.000284778	0.000217327
ASB2	0.0602697	0.0436477	0.05405	0.0547154	0.097683	0.0501905	0.0741515	0.100862	0.102278	0.000653774	0	0	0.0204021	0.0208102	0.0133372			0.0526558	0.0675296	0.0924305	0.000217925	0.0181832
ASB3	7.34418	8.37687	6.72239	8.39064	7.05113	7.11376	7.01051	8.87872	7.2109	7.50671	8.46711	8.59978	8.77557	9.50984	8.2129			7.48115	7.51851	7.70004	8.1912	8.83277
ASB4	0.00795077	0	0	0.0217804	0.00769342	0.00967714	0	0	0	0	0	0	0.0431001	0.00730483	0.0296971			0.00265026	0.0130503	0	0	0.0267007
ASB5	0.0449376	0.0314736	0.130666	0.0426872	0.0771304	0.0131809	0.0601406	0.0240486	0.00043483	0.107094	0.114453	0.0840069	0.0149367	0.00993952	0.0292874			0.0690257	0.0443328	0.028208	0.101851	0.0180545
ASB6	15.5513	17.2222	15.2647	18.1372	19.1281	17.61	18.0417	15.3855	15.5275	17.0774	15.5631	18.3865	16.2784	15.548	16.3592			16.0127	18.2918	16.3182	17.009	16.0619
ASB7	4.45142	4.65382	3.9638	5.08067	4.4473	3.85342	4.41872	3.01071	3.42469	3.82452	3.36985	3.5154	4.31395	4.72941	4.51013			4.35635	4.46046	3.61804	3.56992	4.51783
ASB8	6.80334	5.98188	7.3027	6.17844	5.8124	5.57228	6.52435	5.43528	5.28845	7.63794	6.90123	6.99622	7.15197	6.4308	8.41888			6.69597	5.85437	5.74936	7.17846	7.33388
ASB9	0.965071	0.44788	0.521915	0.568406	0.60257	0.474228	0.681807	1.16419	0.556242	0.773957	0.864538	0.815783	0.804453	0.674716	1.01466			0.644955	0.548401	0.800746	0.818093	0.831276
ASCC1	9.37628	9.84417	10.9831	9.29939	8.39033	9.22057	9.27835	10.9017	9.83333	10.0726	10.0328	9.40312	9.51955	9.96868	10.4258			10.0678	8.9701	10.0045	9.83617	9.97134
ASCC2	27.607	28.217	28.0499	27.7677	26.5819	27.5589	26.9236	24.3831	25.9929	27.554	26.6688	27.8696	27.7137	28.7226	29.2939			27.958	27.3028	25.7665	27.3641	28.5767
ASCC3	21.0064	19.1902	19.7569	17.7408	18.0262	16.4094	18.5269	15.5203	19.7826	20.1359	19.0167	19.5285	20.138	21.0506	20.4524			19.9845	17.3921	17.9433	19.5604	20.547
ASCL1	0	0.0538231	0	0.0507749	0	0	0	0.0118141	0	0.0121755	0	0	0.00849488	0.0113284	0			0.017941	0.016925	0.00393803	0.0040585	0.00660776
ASCL2	0	0	0	0.0156078	0	0	0	0	0	0	0	0.0161074	0	0	0			0	0.0052026	0	0.00536913	0
ASCL3	0.126526	0.00172404	0.0292382	0.00487919	0.005172	0.00650585	0	0.0118544	0.00526927	0.00527739	0.0124472	0.00503539	0.00368203	0	0.00962337			0.0524961	0.00551901	0.00570789	0.00758666	0.00443513
ASCL4	0	0.0264693	0	0	0.0264687	0	0	0	0	0	0	0	0	0	0.0123124			0.0088231	0.0088229	0	0	0.00410413
ASCL5	0.0231401	0	0	0	0.022391	0	0.0279884	0.0256631	0	0	0	0	0	0.0212577	0			0.00771337	0.00746367	0.0178838	0	0.0070859
ASF1A	12.5982	13.1901	13.2643	10.8489	14.0363	10.3686	13.6045	13.3864	13.8674	13.334	12.9356	13.7875	13.9352	15.3469	15.6863			13.0175	11.7513	13.6194	13.3524	14.9895
ASF1B	8.85118	8.4196	9.75583	6.19659	6.99406	7.82752	10.3643	10.3215	8.15877	9.95583	11.6837	9.47784	12.4613	11.5185	13.1885			9.00887	7.00606	9.61486	10.3725	12.3894
ASGR1	0.261435	0.649788	0.465533	1.11347	0.45517	0.425548	0.685119	0.928627	0.672166	0.4932	0.32313	0.467681	0.64407	0.585419	0.548893			0.458919	0.664729	0.761971	0.428004	0.592794
ASGR2	0	0	0	0	0	0	0	0	0	0	0	0.00189112	0	0	0			0	0	0	0.000630373	0
ASH1L	9.25842	8.356	8.80585	8.15228	8.25232	8.12055	8.26922	6.75844	7.98518	7.85907	6.9149	8.27251	7.71203	8.65174	7.76392			8.80676	8.17505	7.67095	7.68216	8.04256
ASH2L	14.1919	13.2411	13.6675	10.4843	11.7766	11.1574	12.6932	14.2417	14.3286	14.1479	13.7093	12.8518	15.7508	15.4622	15.2962			13.7002	11.1394	13.7545	13.5697	15.5031
ASIC1	1.58719	1.42207	1.79112	1.51274	1.38426	1.14275	1.36816	1.35102	1.64323	2.09669	2.39687	1.91765	1.77442	1.59764	1.62322			1.60013	1.34658	1.45414	2.13707	1.66509
ASIC2	0.0339231	0.0181481	0.020102	0.0829366	0.0364785	0.0418933	0.0508654	0.0934732	0.0138567	0.0460934	0.026168	0.0372681	0.0645678	0.110322	0.0447561			0.0240577	0.0537695	0.0527318	0.0365098	0.0732153
ASIC3	0.274864	0.367932	0.287907	0.524492	0.382763	0.266853	0.399514	0.222947	0.233183	0.23279	0.205934	0.269872	0.416499	0.385256	0.31815			0.310234	0.391369	0.285215	0.236199	0.373302
ASIC4	0.0279229	0.0834008	0.0352853	0.0200387	0.0401427	0.0233549	0.0528106	0.0644377	0.0219012	0.0486485	0.00268161	0.124656	0.110414	0.0809027	0.0262074			0.0488697	0.0278454	0.0463832	0.058662	0.072508
ASIC5	0	0	0	0	0	0	0	0	0	0	0	0	0	0	0			0	0	0	0	0
ASIP	0.454653	0.308635	0.188229	0.170008	0.29454	0.658903	0.172027	0.305454	0.332091	0.170538	0.355241	0.174836	0.195616	0.459704	0.305681			0.317172	0.374484	0.269857	0.233538	0.320334
ASL	28.4503	28.816	25.5027	23.1231	26.2639	24.9513	27.5659	29.4011	24.8622	30.7141	30.5459	31.9864	28.7544	27.3819	29.4511			27.5897	24.7794	27.2764	31.0821	28.5291
ASMT	6.9822e-171	0.039337	0	0.0273052	0.0148374	0	0.0741859	0.067634	0.0400759	0	0.0236671	0.0191486	0.0278388	0.0757302	0.0459785			0.0131123	0.0140475	0.0606319	0.0142719	0.0498492
ASMTL	8.69081	9.14842	9.08584	8.09075	8.50089	8.35938	9.41902	10.4947	8.58348	11.1951	11.7741	10.8188	9.76782	9.69531	10.3136			8.97502	8.31701	9.49907	11.2627	9.92558
ASNA1	53.8481	56.3203	52.2747	51.8637	53.874	55.0696	60.6239	63.6902	58.7192	53.3821	49.357	52.6063	54.7119	57.7847	57.2165			54.1477	53.6024	61.0111	51.7818	56.571
ASNS	41.3243	44.1806	39.1386	44.9105	43.0675	42.6718	39.884	45.8741	38.0705	21.0129	20.538	22.3685	20.6253	23.0562	20.5566			41.5478	43.5499	41.2762	21.3065	21.4127
ASNSD1	25.6313	24.949	25.4788	21.978	22.6783	21.4121	21.9541	27.0263	25.7648	24.5399	24.2986	27.2341	26.9504	26.3587	26.1923			25.353	22.0228	24.9151	25.3575	26.5005
ASPA	0.0943982	0.0259107	0.167034	0.106795	0.14912	0.183021	0.0790476	0.0835094	0.167931	0.0376839	0.130224	0.0728641	0.0752183	0.133775	0.0994694			0.095781	0.146312	0.110163	0.0802573	0.102821
ASPDH	0.101136	0.0471131	0.0177555	0.0355559	0.0725002	0.0118524	0.0471115	0.021597	0.0960526	0.0288433	0.0566912	0.0366942	0.0804957	0.017891	0.03776			0.0553349	0.0399695	0.0549204	0.0407429	0.0453822
ASPG	0	0.00101112	0.0350087	0	0	0	0.194924	0.193674	0.123498	0	0	0	0.014666	0.0176382	0.00977951			0.0120066	0	0.170699	0	0.0140279
ASPH	180.792	174.167	186.429	162.146	168.425	156.079	168.088	131.031	178.685	213.188	188.937	193.002	186.45	189.238	186.161			180.463	162.217	159.268	198.376	187.283
ASPHD1	9.75579	10.2099	9.38823	10.1788	10.3438	11.6449	9.88696	12.9544	8.54483	10.673	11.314	12.1956	10.2836	9.57875	11.1994			9.78464	10.7225	10.4621	11.3942	10.3539
ASPHD2	0.528043	0.658971	0.629932	0.856735	0.504683	0.830435	0.48673	0.720524	0.864174	0.619692	0.619512	0.388903	0.608145	0.572011	0.759559			0.605649	0.730618	0.690476	0.542702	0.646572
ASPM	5.5561	4.59046	5.76488	2.33118	3.29136	2.93564	5.04018	3.68235	5.84837	6.19956	6.51752	5.31784	7.27699	7.18004	6.58035			5.30381	2.85273	4.85697	6.01164	7.01246
ASPN	0.0572501	0.151719	0.194747	0.0487481	0.0619547	0.0604196	0.0729092	0.0306088	0.102876	0.1585	0.151691	0.149978	0.0858463	0.108421	0.239039			0.134572	0.0570408	0.068798	0.15339	0.144435
ASPRV1	0.18529	0.11035	0.155933	0.156133	0.19333	0.124284	0.0861971	0.0474294	0.0683103	0.0675255	0.0497902	0.0320279	0.0883683	0.251071	0.192463			0.150524	0.157916	0.0673123	0.0497812	0.177301
ASPSCR1	8.04518	7.03986	7.15077	6.70541	6.93408	7.37374	7.7793	8.35241	7.64574	7.30397	7.48982	7.69576	7.3153	6.95891	7.35614			7.41194	7.00441	7.92582	7.49652	7.21012
ASRGL1	0.471372	0.207433	0.388605	0.241373	0.202168	0.394598	0.415163	0.293706	0.412045	0.547616	0.442109	0.365536	1.04833	0.800048	0.913655			0.355803	0.27938	0.373638	0.451754	0.920678
ASS1	59.0164	58.6206	55.7421	63.9022	66.5391	64.1314	64.1941	67.6705	60.1933	58.9839	59.0531	59.146	52.678	54.4393	54.6023			57.793	64.8576	64.0193	59.061	53.9065
ASTE1	2.28545	2.14921	1.86722	2.13618	2.16825	2.08584	1.80021	2.09035	2.33578	2.19891	2.15454	1.81639	2.00036	2.21769	2.08078			2.10063	2.13009	2.07545	2.05661	2.09961
ASTL	0.0194301	0	0	0.0264395	0.00135549	0.0107338	0.3787	0.0960116	0.164892	0.038433	0	0.00832518	0.0669469	0.0504965	0.046016			0.0064767	0.0128429	0.213201	0.0155861	0.0544865
ASTN1	0.00969032	0.0157742	0	0.00359809	0	0.0297677	0.0118306	0.00899605	0.00777196	0.0321987	0	0.0077188	0.0269397	0.0075729	0.00354802			0.00848817	0.0111219	0.00953287	0.0133058	0.0126869
ASTN2	2.40028	2.5199	1.83164	2.50679	1.85086	2.3701	2.98448	2.58776	2.9346	2.95477	2.66145	2.45502	2.64502	2.55958	3.26349			2.25061	2.24258	2.83561	2.69041	2.8227
ASUN	27.281	25.7883	27.7943	19.5698	22.2058	22.3083	25.045	30.2245	29.2017	32.3068	29.9502	31.4076	31.4783	31.7449	32.2944			26.9545	21.3613	28.1571	31.2215	31.8392
ASXL1	25.1628	23.0902	21.5416	19.731	20.928	21.7702	21.0191	16.3323	24.6243	24.1165	27.258	24.1135	19.6083	24.056	24.307			23.2649	20.8097	20.6586	25.1627	22.6571
ASXL2	5.35835	4.70853	5.29867	5.03258	4.55666	4.20768	5.32734	3.01818	5.43893	5.52654	5.24653	4.63704	5.34402	5.42628	5.05853			5.12185	4.59897	4.59482	5.1367	5.27628
ASXL3	0.017184	0.004918	0.00926777	0.0160452	0.0232671	0.00975755	0.0290829	0.0267771	0.010967	0.0217596	0.0281138	0.00647182	0.0118245	0.0173574	0.019903			0.0104566	0.0163566	0.0222757	0.0187817	0.0163616
ASZ1	0	0.000424129	0	0	0	0	0	0.000486033	0	0	0.000170118	0	0	0	0			0.000141376	0	0.000162011	5.6706e-05	0
ATAD1	23.4882	22.1534	23.3316	24.1608	20.501	20.5276	22.8926	17.5144	23.1434	24.1216	19.1885	21.9857	20.2393	21.7288	22.6429			22.9911	21.7298	21.1835	21.7653	21.537
ATAD2	12.2911	10.3083	11.713	7.83974	9.54964	8.89249	9.95153	9.75231	11.5596	14.804	14.5883	14.3293	16.8163	15.3121	15.8114			11.4375	8.76062	10.4211	14.5739	15.9799
ATAD2B	1.4014	1.10746	1.22085	1.09021	1.12773	0.992061	0.933858	0.776165	1.08706	1.07698	0.955637	1.09341	1.16791	1.04713	1.06049			1.24324	1.07	0.932361	1.04201	1.09184
ATAD3A	39.4991	41.2795	39.4617	35.5946	36.2063	37.4714	40.7379	34.2363	35.3254	38.7502	38.8595	37.7899	44.1432	42.0089	41.1433			40.0801	36.4241	36.7665	38.4665	42.4318
ATAD3B	30.8449	33.2288	31.2845	32.7174	33.5398	35.5228	33.4687	29.0394	28.4017	28.1941	29.5382	27.7558	29.611	28.6269	30.0706			31.7861	33.9267	30.3033	28.496	29.4362
ATAD3C	3.32897	3.44803	3.54749	2.97865	3.43513	3.52353	3.82521	3.34656	3.06157	3.29734	3.28758	3.20452	3.86268	3.87907	3.60888			3.4415	3.31244	3.41111	3.26315	3.78354
ATAD5	1.792	1.70109	1.75524	1.27837	1.02784	1.39486	1.38664	1.45056	1.26	1.56517	1.86662	1.68213	2.17698	1.9614	2.06071			1.74944	1.23369	1.36573	1.70464	2.06636
ATAT1	4.60814	4.93483	3.87062	5.01508	4.128	4.08625	4.69892	5.04517	4.16569	4.47674	4.07606	4.83285	5.68167	4.96306	5.89646			4.4712	4.40978	4.63659	4.46188	5.51373
ATCAY	0.0334457	0.00230103	0.0106403	0.00532108	0.0620418	0.0028944	0.000958731	0.0128999	0.000586064	0.0905515	0.0722028	0.0548547	0.00389051	0.00054613	0.0261742			0.0154623	0.0234191	0.0048149	0.0725363	0.0102036
ATE1	8.3725	7.20187	7.76967	6.84187	7.28417	6.6407	6.62392	5.72503	7.84211	8.48972	8.3045	7.57235	8.55426	8.758	7.58195			7.78135	6.92225	6.73035	8.12219	8.29807
ATF1	17.7836	18.0939	18.4948	16.2959	18.0133	17.6073	16.3998	20.7394	16.2624	16.0465	15.8497	17.1429	16.4147	15.5003	16.1362			18.1241	17.3055	17.8005	16.3464	16.0171
ATF2	11.551	11.4031	12.2861	12.2595	10.5036	11.3291	12.2609	9.20961	10.7846	9.35766	9.84567	10.785	9.69915	9.66537	9.42963			11.7467	11.3641	10.7517	9.99611	9.59805
ATF3	30.3003	38.3706	31.1891	72.3452	43.5104	46.303	22.4864	25.0341	22.0034	1.34275	1.20055	1.21561	2.4893	3.17689	3.1298			33.2867	54.0529	23.1746	1.25297	2.932
ATF4	284.106	285.534	276.524	304.067	300.46	293.954	249.913	284.866	242.958	205.78	216.845	218.58	243.802	251.501	231.489			282.055	299.494	259.246	213.735	242.264
ATF5	22.889	23.0691	22.0468	24.4731	25.0596	24.2497	22.2251	22.4494	20.6413	21.5471	20.3888	19.6453	19.7068	18.546	18.6694			22.6683	24.5941	21.7719	20.5271	18.9741
ATF6	18.0878	17.6092	18.4099	17.5008	18.5272	17.3564	17.087	15.9043	18.0481	20.3079	18.4255	17.1462	17.653	19.02	17.5671			18.0356	17.7948	17.0131	18.6265	18.08
ATF6B	18.6356	18.1155	18.0286	17.315	17.9368	17.6426	18.2251	18.3334	17.6914	19.7871	19.7993	20.0667	21.4687	17.8584	19.8191			18.2599	17.6315	18.0833	19.8844	19.7154
ATF7	9.13506	7.7314	9.3366	8.21347	8.74843	7.84888	9.54986	8.86723	10.8925	10.1914	9.89658	9.05891	9.14215	10.2315	10.5534			8.73435	8.27026	9.76986	9.71563	9.97568
ATF7IP	9.70848	9.93773	9.76574	11.314	10.3064	10.6791	9.87417	7.25991	10.2032	9.87732	8.61314	8.72631	9.52638	9.64783	9.63333			9.80398	10.7665	9.11243	9.07226	9.60251
ATF7IP2	0.0751694	0.168305	0.0715209	0.500797	0.192121	0.169247	0.119744	0.0531621	0.0446884	0.113586	0.055628	0.0289345	0.184614	0.130633	0.268367			0.104998	0.287388	0.0725315	0.0660495	0.194538
ATG10	5.37428	7.16158	7.78111	5.80782	7.45842	4.95206	5.65586	6.26389	9.75207	5.96729	9.18536	7.77174	8.18	6.96513	8.36795			6.77232	6.07277	7.22394	7.64146	7.83769
ATG101	29.5665	32.614	27.7786	31.8291	32.5296	32.5388	31.6124	34.8862	30.2638	28.7981	27.2619	29.4905	30.2711	32.4636	29.8074			29.9864	32.2992	32.2541	28.5168	30.8474
ATG12	43.1356	38.0209	44.8181	43.2623	44.9807	45.2215	44.6432	48.7828	47.5427	52.437	51.4336	47.0424	47.964	45.9118	47.3569			41.9915	44.4882	46.9896	50.3043	47.0776
ATG13	21.6231	21.4788	21.6645	24.3436	22.6859	22.374	20.8973	19.245	20.3942	21.8897	18.9791	23.6158	19.3362	19.4775	19.7531			21.5888	23.1345	20.1788	21.4949	19.5223
ATG14	4.28347	4.54759	4.15729	4.91333	4.19445	3.79503	3.75914	3.48494	3.77939	5.28852	4.32602	5.01218	3.92284	3.93779	4.15467			4.32945	4.30094	3.67449	4.87557	4.0051
ATG16L1	9.75025	9.49289	9.69425	8.68524	8.30068	8.82531	9.52264	8.94949	10.4918	10.3392	9.43099	10.2065	10.4952	10.9199	10.6718			9.6458	8.60374	9.65464	9.99223	10.6956
ATG16L2	3.5963	4.52463	3.25114	3.55292	3.65117	3.02217	4.51122	4.1828	3.94334	3.10505	4.08813	4.03921	4.16417	3.58576	5.15737			3.79069	3.40875	4.21245	3.74413	4.30243
ATG2A	5.56956	5.73397	5.85746	6.41005	5.67881	5.61065	6.25107	4.91583	5.38345	5.31863	5.87978	5.92872	5.93579	5.34606	5.2059			5.72033	5.89984	5.51678	5.70904	5.49592
ATG2B	3.98232	4.04795	4.46264	4.32929	3.70247	3.59488	3.85439	2.83463	4.28544	4.10116	4.11069	4.0913	3.94272	4.02345	4.20548			4.1643	3.87555	3.65815	4.10105	4.05722
ATG3	36.1397	34.2232	39.7034	36.5429	36.0676	39.9833	35.7225	45.091	36.1819	33.4982	32.768	36.505	37.7119	38.974	38.5528			36.6888	37.5313	38.9985	34.2571	38.4129
ATG4A	5.1265	5.73029	5.42865	4.76724	4.75358	5.14136	5.46653	5.76098	5.29167	5.14073	5.45949	6.39848	6.43249	6.607	7.33104			5.42848	4.88739	5.50639	5.66623	6.79018
ATG4B	23.8688	26.8365	24.2091	23.7113	24.8655	25.2439	25.9605	25.8536	23.9049	25.2368	24.9984	21.7284	25.5126	25.0314	25.7305			24.9715	24.6069	25.2397	23.9879	25.4248
ATG4C	7.79123	6.64307	7.62409	5.44846	6.63833	5.82074	7.65577	8.89251	8.33359	9.60204	8.15793	8.33608	9.87891	8.55879	9.18437			7.3528	5.96918	8.29396	8.69868	9.20736
ATG4D	6.5703	7.03519	6.92868	8.31438	7.55623	7.41403	8.74817	9.22784	6.90821	5.62386	5.09676	5.72691	6.55937	7.16927	7.20531			6.84472	7.76155	8.29474	5.48251	6.97798
ATG5	24.1168	22.3863	21.1226	21.567	21.3726	23.876	19.3413	26.2636	25.1672	23.3624	25.4758	24.4202	23.7811	24.8893	25.1057			22.5419	22.2719	23.5907	24.4195	24.592
ATG7	14.2095	14.3326	14.7029	12.1372	15.2805	13.1911	14.6391	13.7979	15.4962	17.2926	15.5509	17.4668	16.2934	16.1652	17.0959			14.415	13.5363	14.6444	16.7701	16.5182
ATG9A	20.34	21.558	20.465	20.6095	21.6741	21.8388	23.1246	20.2617	20.5229	19.7301	19.6236	19.7915	21.5187	21.4279	22.0887			20.7877	21.3741	21.3031	19.7151	21.6784
ATG9B	0.0717814	0.103147	0.0525035	0.120239	0.0802398	0.107133	0.150391	0.103984	0.0995521	0.0615556	0.0945524	0.108156	0.166624	0.122327	0.168188			0.0758106	0.102537	0.117976	0.088088	0.15238
ATHL1	13.5475	15.4194	11.7076	13.8504	12.5847	12.7024	14.1422	12.4219	13.4533	12.6182	13.1738	13.186	12.5892	11.8985	13.2039			13.5582	13.0458	13.3391	12.9927	12.5639
ATIC	75.463	73.1073	77.3488	58.2869	64.7345	64.7082	73.2118	82.9062	76.4993	78.8928	80.6867	79.6331	84.8597	86.9161	85.5598			75.3064	62.5765	77.5391	79.7375	85.7785
ATL1	2.5336	2.56432	2.89413	2.46366	2.47215	2.66424	2.32005	2.65432	2.70285	2.94924	2.42204	3.10337	2.31546	3.0022	2.61022			2.66402	2.53335	2.55907	2.82488	2.64263
ATL2	10.3806	10.0441	10.648	8.01785	8.82327	7.83054	9.30288	10.7488	10.6734	12.0896	11.1863	11.9638	12.6624	12.5407	12.9993			10.3576	8.22389	10.2417	11.7466	12.7341
ATL3	26.9882	31.007	33.0819	27.0211	28.2341	22.4175	26.1876	25.423	27.9231	29.739	29.6964	30.5247	29.6685	29.0556	25.0298			30.359	25.8909	26.5112	29.9867	27.918
ATM	6.74971	6.29443	6.93094	4.93549	5.41712	4.81003	5.96058	5.39558	7.21607	7.32193	7.32026	7.16897	7.32359	7.56107	7.25178			6.65836	5.05421	6.19074	7.27039	7.37881
ATMIN	16.9747	16.88	16.4795	18.1287	17.9869	16.3947	16.8107	16.8961	16.6742	16.4087	16.1445	16.622	15.1207	16.9106	17.0543			16.7781	17.5034	16.7937	16.3917	16.3619
ATN1	33.2469	34.5191	32.8352	37.8728	35.7741	36.617	35.8737	28.9924	30.1504	29.5982	30.8027	32.1692	34.758	32.5791	33.0351			33.5337	36.7546	31.6722	30.8567	33.4574
ATOH1	0	0	0	0	0	0	0	0	0	0	0	0	0	0	0			0	0	0	0	0
ATOH7	0.106977	0.124219	0.195061	0.0390614	0.0414056	0	0.0258782	0	0.0421843	0.0211247	0.0249122	0	0.103171	0.0589648	0.0923328			0.142086	0.0268223	0.0226875	0.0153456	0.0848229
ATOH8	2.2225	1.3568	1.58829	2.50515	2.08475	2.28742	1.68014	1.35651	1.3366	2.9578	2.87679	2.63538	1.55177	1.94394	1.56715			1.72253	2.29244	1.45775	2.82332	1.68762
ATOX1	113.818	125.352	113.723	100.558	108.918	115.92	122.842	164.603	126.901	126.695	132.556	129.5	119.855	123.613	130.083			117.631	108.465	138.115	129.584	124.517
ATP10A	9.34812	9.26772	8.95588	10.5133	10.0153	9.01181	10.207	8.00956	8.69949	5.32988	5.92638	5.71624	5.61397	6.18879	6.06926			9.19057	9.8468	8.97202	5.6575	5.95734
ATP10B	0.000268626	0.000247557	0.000139946	0.00046941	0.000103972	0.000200183	0.000198923	0.000283689	0.000264818	0.000183132	0.000426225	0.000132558	0.00485915	0.000141014	0.000416854			0.00021871	0.000257855	0.000249143	0.000247305	0.00180567
ATP10D	4.90755	5.21911	4.72887	4.6563	4.37042	4.42803	5.21763	4.82439	5.26731	4.5723	4.61936	4.35208	5.55135	5.45404	5.2167			4.95184	4.48492	5.10311	4.51458	5.40736
ATP11A	4.76944	4.29377	4.37624	4.05412	3.87749	3.42163	4.84065	2.9629	4.62025	5.53383	4.85617	4.9695	5.25366	4.78024	5.04583			4.47982	3.78441	4.14127	5.11983	5.02658
ATP11AUN	0	0.00145967	0	0.000344251	0.000364911	0	0	0	0	0	0.00109777	0	0.00155872	0.000692882	0.000678977			0.000486557	0.000236387	0	0.000365923	0.00097686
ATP11B	8.57103	8.2705	8.48737	7.59814	7.58187	6.56758	7.99984	6.578	8.68879	9.92924	8.42824	9.18121	9.75396	9.67962	9.88722			8.44297	7.2492	7.75554	9.17956	9.7736
ATP11C	4.86034	4.06439	4.5827	3.52546	3.61872	3.48821	4.27247	3.66064	5.42696	6.08894	5.41195	5.16201	5.79768	5.579	5.65035			4.50248	3.54413	4.45336	5.5543	5.67568
ATP12A	0.000901338	0.00261654	0.00273916	0.0096014	0.00261648	0.00146279	0.0138113	0.000999481	0.00155498	0	0.00104949	0.00905892	0.0138906	0.0176946	0.00865678			0.00208568	0.00456022	0.00545525	0.00336947	0.013414
ATP13A1	20.607	21.788	19.9252	20.9881	19.9341	19.9051	22.6725	19.4176	19.4808	20.1413	19.4325	20.1536	21.2322	20.3009	19.9012			20.7734	20.2758	20.5236	19.9091	20.4781
ATP13A2	7.66352	7.79119	7.48247	9.53794	9.02643	8.96716	8.8344	6.76254	6.73711	9.60013	8.74164	8.87231	8.12784	8.33956	7.8622			7.64573	9.17718	7.44468	9.07136	8.10987
ATP13A3	33.2384	31.575	32.1588	28.0308	27.8696	24.5004	28.3508	25.8141	34.5345	48.2934	43.5856	48.27	37.9645	39.417	38.4165			32.3241	26.8003	29.5665	46.7163	38.5993
ATP13A4	0.0149035	0.00735522	0	0.0199656	0.00367612	0.00924696	0.00459214	0.00655699	0.000177593	0	0.000209758	0.0111464	0.0695745	0.0152322	0.0563273			0.00741957	0.0109629	0.00377557	0.00378539	0.0470447
ATP13A5	0.000270576	0	0	6.17485e-05	0.000261817	0	0	0	0.00026674	0	0.000945152	0	0.00748752	0.0096071	0.000365365			9.0192e-05	0.000107855	8.89133e-05	0.000315051	0.00582
ATP1A1	122.196	121.325	117.762	135.084	127.832	123.822	117.883	111.059	115.693	128.737	129.488	135.618	124.085	123.813	122.57			120.428	128.913	114.878	131.281	123.489
ATP1A2	0.0272288	0.0206937	0.0179294	0.0640242	0.0476967	0.0119399	0.0594132	0.0118577	0.0316036	0.0158263	0.0496798	0.010067	0.0163465	0.0385932	0.0177037			0.0219506	0.0412203	0.0342915	0.025191	0.0242145
ATP1A3	1.30888	1.02191	1.20692	1.49605	1.25199	1.03188	3.06754	1.92391	2.69808	1.93131	1.45587	1.75695	1.67997	1.71371	1.58378			1.17924	1.25997	2.56318	1.71471	1.65915
ATP1A4	0.00558525	0.0123533	0.0101841	0.00932185	0.00308826	0.00485589	0.00386027	0.000884772	0	0	0.111995	0	0.0295563	0.00586389	0.00215483			0.00937422	0.00575533	0.00158168	0.0373317	0.012525
ATP1B1	5.35096	4.00838	5.62685	4.38003	4.75794	4.00554	5.18843	6.48488	6.28737	6.32026	6.17732	5.9136	9.09183	8.12926	8.35636			4.9954	4.38117	5.98689	6.13706	8.52582
ATP1B2	0.12469	0.0636515	0.0215494	0.0707777	0.0591892	0.0432622	0.636599	0.690082	0.62303	0.0116688	0.0137609	0.12565	0.0455284	0.114368	0.11863			0.0699636	0.057743	0.649904	0.0503599	0.0928421
ATP1B3	119.73	114.398	120.549	107.126	111.693	107.457	113.349	138.138	122.482	128.491	131.551	135.582	130.021	138.235	132.902			118.226	108.759	124.656	131.875	133.719
ATP1B4	0	0	0	0	0	0	0	0.00148637	0.00607225	0	0	0.00252553	0.0444798	0.0169617	0.0277249			0	0	0.00251954	0.000841843	0.0297221
ATP2A1	0.745711	0.59593	0.608628	0.888665	0.634202	0.684716	0.770617	0.580451	0.838536	0.338371	0.329317	0.422353	0.820564	0.660059	0.6399			0.65009	0.735861	0.729868	0.363347	0.706841
ATP2A2	88.4741	87.1905	88.6756	84.2537	87.0465	82.4077	90.0896	73.1287	84.9976	116.996	107.297	110.544	100.495	97.9821	98.1188			88.1134	84.5693	82.7386	111.612	98.8653
ATP2A3	2.1142	2.12766	1.68792	2.16446	1.93916	1.96013	3.39079	2.62074	2.69269	1.95361	1.949	2.12205	1.86422	1.65937	1.78059			1.97659	2.02125	2.90141	2.00822	1.76806
ATP2B1	39.0384	35.2493	40.4331	33.3708	34.5412	33.006	35.4311	25.5902	38.3647	40.0583	37.1323	38.2919	39.0544	39.9014	37.9331			38.2403	33.6393	33.1287	38.4942	38.963
ATP2B2	0.0114483	0.0227142	0.0416683	0.00348208	0.0114131	0.0142266	0.0237371	0.0169264	0.0258325	0.02303	0.0273009	0.0218253	0.0235645	0.0245592	0.0214615			0.0252769	0.00970726	0.0221653	0.0240521	0.0231951
ATP2B3	0.00129546	0.0123746	0.000787379	0.00591279	0.00208921	0.00548215	0.0958729	0.141695	0.13308	0.00446892	0.0020112	0.00203403	0.00565197	0.00198347	0.00310986			0.00481915	0.00449472	0.123549	0.00283805	0.00358177
ATP2B4	86.9098	81.9285	84.4333	66.9622	70.5788	66.3522	82.592	64.2137	86.5607	84.4399	81.3861	86.7448	85.2289	90.0279	88.3278			84.4239	67.9644	77.7888	84.1903	87.8615
ATP2C1	42.5935	43.6885	43.8378	40.613	42.4273	38.4132	42.7515	46.5603	45.5814	44.5943	43.9093	47.2189	46.3547	45.0987	47.1252			43.3733	40.4845	44.9644	45.2408	46.1929
ATP2C2	0.0534934	0.051693	0.0327344	0.033582	0.0222416	0.0234637	0.0369626	0.0258008	0.0241777	0.0346136	0.0562628	0.025237	0.0579364	0.0278033	0.0624515			0.0459736	0.0264291	0.0289804	0.0387045	0.0493971
ATP4A	0.0126159	0.00410028	0	0.00580209	0.0121242	0.00257881	0.0404326	0.024831	0.0207917	0.00418374	0.00246693	0.00789316	0.0293915	0.0598515	0.0144361			0.00557206	0.00683503	0.0286851	0.00484794	0.0345597
ATP4B	0	0.0029584	0.00557468	0	0	0.00372129	0	0.00339025	0	0	0.00355985	0	0.00210609	0	0.00550449			0.00284436	0.00124043	0.00113008	0.00118662	0.00253686
ATP5A1	260.754	255.392	271.091	216.23	235.369	235.999	256.852	298.537	259.89	284.255	279.905	285.879	290.336	290.373	294.127			262.412	229.199	271.76	283.346	291.612
ATP5B	408.591	410.821	414.424	359.311	389.435	390.845	405.39	464.314	414.667	437.01	430.092	445.806	436.975	438.017	446.935			411.279	379.864	428.124	437.636	440.642
ATP5C1	135.59	133.152	146.733	108.48	118.125	122.154	130.017	169.23	150.004	139.131	139.344	145.305	147.79	158.262	159.246			138.492	116.253	149.75	141.26	155.099
ATP5D	78.4229	87.4139	85.2425	77.4659	82.6164	77.7098	84.2636	100.444	72.2701	74.5603	82.048	77.6984	97.6968	82.61	83.1992			83.6931	79.264	85.6592	78.1022	87.8353
ATP5E	358.454	375.162	365.109	348.104	352.87	385.603	372.404	481.883	390.21	364.284	354.613	349.737	359.284	377.993	390.378			366.242	362.192	414.832	356.211	375.885
ATP5F1	112.37	108.85	121.33	95.8212	104.545	102.268	107.582	134.963	111.181	115.847	120.76	120.509	123.794	124.999	125.118			114.183	100.878	117.909	119.039	124.637
ATP5G1	130.042	131.319	130.338	103.025	117.497	127.885	128.397	174.902	131.541	140.446	142.417	133.416	141.752	143.367	146.374			130.566	116.136	144.947	138.76	143.831
ATP5G2	224.52	233.346	228.03	192.553	215.24	219.947	240.177	305.374	245.369	258.803	238.425	237.608	256.869	257.441	256.63			228.632	209.247	263.64	244.945	256.98
ATP5G3	205.425	203.489	210.229	172.462	194.253	198.828	203.394	269.826	198.54	203.208	198.837	227.469	225.298	227.571	240.435			206.381	188.514	223.92	209.838	231.101
ATP5H	183.997	181.203	203.923	161.716	175.957	177.395	185.696	243.148	200.48	229.78	212.071	219.755	209.742	215.309	208.516			189.708	171.689	209.775	220.535	211.189
ATP5I	131.279	151.642	129.346	138.159	142.734	155.426	154.349	180.85	143.914	147.887	147.031	139.88	157.205	151.172	151.865			137.422	145.44	159.704	144.933	153.414
ATP5J	165.895	164.535	178.28	153.711	154.981	154.398	158.783	224.201	187.89	198.037	181.603	198.914	195.522	197.896	200.68			169.57	154.363	190.291	192.851	198.033
ATP5J2	186.738	192.099	200.556	171.55	181.06	198.372	202.562	257.587	220.26	199.11	198.993	212.173	214.822	220.881	238.22			193.131	183.661	226.803	203.425	224.641
ATP5J2-PTCD1	0.106614	0.370136	0.095155	0.10038	0.0785667	0.254027	0.0868268	0.0786417	0.180744	0.0803494	0.0827776	0.630683	0.415829	0.0996515	0.0973656			0.190635	0.144325	0.115404	0.264603	0.204282
ATP5L	145.561	151.724	146.612	137.486	150.359	126.154	140.41	207.327	148.58	164.566	164.096	168.861	178.199	173.397	179.678			147.966	138	165.439	165.841	177.091
ATP5L2	0.381332	0.535397	0.132249	0.356662	0.66683	0.124878	1.98232e-54	1.13696	0.119983	0.528466	0.24889	0.361168	0.798394	0.0551773	0			0.349659	0.38279	0.418981	0.379508	0.284524
ATP5O	121.609	119.012	135.77	100.261	108.086	111.801	112.736	163.214	126.496	127.399	127.076	130.536	136.743	142.682	140.043			125.464	106.716	134.149	128.337	139.823
ATP5S	6.27649	6.35751	4.86833	5.14942	4.41993	6.32832	7.65407	6.93835	6.00047	7.02912	5.57889	5.47015	5.20048	8.04548	6.43169			5.83411	5.29922	6.8643	6.02605	6.55922
ATP5SL	79.0864	77.172	75.6053	65.5268	75.8181	76.6537	79.3136	81.7003	75.2724	74.1293	87.4229	77.5444	75.9416	72.7642	77.2112			77.2879	72.6662	78.7621	79.6989	75.3057
ATP6AP1	49.4809	51.699	50.9768	51.3412	60.2693	55.9673	55.2337	60.4672	52.5843	48.1199	51.9145	51.4056	50.8167	53.0232	52.527			50.7189	55.8593	56.0951	50.48	52.1223
ATP6AP1L	1.83568	2.23598	1.64431	2.20439	1.0823	1.4615	1.84188	1.22559	1.25459	0.97275	1.14721	1.4444	1.05238	1.34776	2.03462			1.90532	1.58273	1.44069	1.18812	1.47825
ATP6AP2	88.4769	88.4442	87.5987	91.7	91.908	89.6141	84.926	93.1589	85.0967	95.0884	91.8456	95.5361	89.8329	94.3872	91.4647			88.1733	91.074	87.7272	94.1567	91.8949
ATP6V0A1	12.3509	11.8573	11.4802	11.0459	10.8342	11.1991	10.9715	11.111	10.6127	12.2735	12.5608	13.6988	12.3896	11.0681	11.908			11.8961	11.0264	10.8984	12.8444	11.7886
ATP6V0A2	6.02453	6.14628	5.76694	7.09815	6.02526	6.18909	6.15476	6.12944	6.40384	6.01349	6.24771	6.46052	6.49827	6.8124	7.2697			5.97925	6.4375	6.22935	6.24057	6.86012
ATP6V0A4	0.0210766	0.0123162	0.0237573	0.0222732	0.00961114	0.000550748	0	0	0.000594755	0.0119708	0.0231364	0.000284179	0.0002078	0.0225539	0			0.01905	0.0108117	0.000198252	0.0117971	0.00758723
ATP6V0B	72.9641	82.8158	75.0474	89.5637	90.1163	91.892	85.0699	99.0507	74.7897	63.0405	67.446	68.8186	78.3556	81.852	74.4583			76.9424	90.524	86.3034	66.435	78.222
ATP6V0C	126.692	151.727	125.054	149.846	153.445	152.224	155.248	174.856	119.709	113.893	127.584	128.487	143.999	130.045	138.884			134.491	151.838	149.938	123.321	137.643
ATP6V0D1	61.296	64.1193	59.0457	68.2864	67.5208	67.9202	59.8279	72.244	60.478	56.5494	55.1709	54.3641	58.7366	61.9031	62.8027			61.487	67.9091	64.1833	55.3615	61.1475
ATP6V0D2	0.290475	0.0323764	0.0549586	0.224519	0.130321	0.181447	0.116324	0.146559	0.097095	0.0256352	0.115524	0.170065	0.0694529	0.0596331	0.0238484			0.125937	0.178762	0.119993	0.103741	0.0509781
ATP6V0E1	237.755	247.566	247.168	264.835	253.153	252.978	232.568	297.576	242.872	248.414	237.867	257.29	230.301	251.014	255.447			244.163	256.989	257.672	247.857	245.587
ATP6V0E2	2.93387	2.74286	2.75029	2.41035	1.9946	3.18586	2.89113	3.48206	3.48622	4.77127	4.08686	3.60286	4.06277	4.03458	3.73481			2.80901	2.53027	3.28647	4.15366	3.94405
ATP6V1A	13.5319	13.3471	13.7133	12.6424	12.7299	11.7672	12.756	13.5221	14.2338	12.3771	11.8462	12.3163	14.2146	14.776	14.7002			13.5308	12.3798	13.504	12.1799	14.5636
ATP6V1B1	0.480206	0.519508	0.456221	0.702801	0.571334	0.475966	0.372485	0.643644	0.672255	0.405643	0.412109	0.262996	0.674863	0.514124	0.38638			0.485312	0.583367	0.562795	0.360249	0.525122
ATP6V1B2	56.7668	57.454	51.9871	62.9275	52.0244	54.9223	48.1617	49.1788	51.7264	39.0463	37.2763	42.8718	42.5639	45.7158	45.608			55.4026	56.6247	49.689	39.7315	44.6292
ATP6V1C1	25.5324	24.8416	25.4864	28.654	27.3465	24.9836	23.8271	25.2311	26.8692	23.6352	20.6539	25.0529	22.4129	24.332	24.9177			25.2868	26.9947	25.3091	23.114	23.8875
ATP6V1C2	0.313515	0.469254	0.359177	0.522671	0.328416	0.245003	0.435501	0.464857	0.525192	0.328349	0.480225	0.337244	0.324521	0.539648	0.51904			0.380649	0.365363	0.475183	0.381939	0.46107
ATP6V1D	49.2604	49.7593	50.8207	43.5673	45.3256	42.3952	41.0526	53.1145	50.0883	54.4527	52.1212	50.8297	50.7338	55.6148	51.1388			49.9468	43.7627	48.0851	52.4679	52.4958
ATP6V1E1	72.6921	75.8905	73.7474	75.6723	76.1691	79.5109	71.8917	91.5915	79.4215	71.3583	73.8289	78.9157	71.7738	79.8219	80.2824			74.11	77.1174	80.9682	74.701	77.2927
ATP6V1E2	1.60301	1.29975	1.58041	1.28792	1.34934	1.79278	1.77209	1.8697	1.41055	1.74702	1.34484	1.42193	1.96527	1.50568	2.15098			1.49439	1.47668	1.68411	1.5046	1.87398
ATP6V1F	96.3115	101.666	92.4209	103.321	101.486	110.232	95.5258	123.608	98.002	87.2539	91.786	86.4252	90.7635	94.2008	90.6431			96.7995	105.013	105.712	88.4884	91.8691
ATP6V1G1	69.8212	80.8519	72.8492	103.791	87.877	84.8738	75.057	86.4432	70.4316	68.0546	64.4498	63.6113	59.5254	71.2801	65.4791			74.5074	92.1806	77.3106	65.3719	65.4282
ATP6V1G2	0.192815	0.233817	0.0822884	0.399327	0.140691	0.153433	0.0972898	0.175291	0.109585	0.245455	0.255743	0.304483	0.201739	0.207609	0.707207			0.16964	0.23115	0.127389	0.26856	0.372185
ATP6V1G3	0	0	0	0	0	0	0	0	0	0	0	0	0	0	0			0	0	0	0	0
ATP6V1H	24.2465	20.8168	24.5341	22.0318	20.8617	19.6961	17.914	26.8702	20.8836	21.804	18.6497	22.1212	21.2504	24.9219	21.4925			23.1991	20.8632	21.8893	20.8583	22.5549
ATP7A	1.19903	1.30102	1.3256	1.03064	1.13938	1.3377	1.17294	1.19856	1.44184	1.54432	1.29402	1.50983	1.52806	1.48404	1.56156			1.27522	1.16924	1.27111	1.44939	1.52455
ATP7B	1.99367	1.87846	2.14232	1.88355	1.69517	2.26643	2.51694	1.9553	1.87804	2.05162	2.20027	2.10998	2.16056	2.17874	2.15901			2.00482	1.94838	2.11676	2.12062	2.1661
ATP8A1	0.101746	0.106215	0.0995211	0.0696939	0.0594121	0.0607097	0.115297	0.0887321	0.141899	0.110696	0.116444	0.114455	0.108256	0.0804847	0.0802567			0.102494	0.0632719	0.115309	0.113865	0.0896658
ATP8A2	0.0530658	0.0608028	0.0106748	0.0382453	0.0236536	0.0427906	0.0464346	0.0232268	0.0103234	0.0448021	0.0347707	0.0330325	0.025393	0.0577234	0.0560404			0.0415145	0.0348965	0.0266616	0.0375351	0.0463856
ATP8B1	16.5554	15.4668	17.2505	10.9263	12.9569	12.3318	14.7802	11.2216	16.3873	16.7268	15.2621	15.2262	18.0453	17.5346	16.1798			16.4242	12.0717	14.1297	15.7384	17.2532
ATP8B2	16.6	17.0446	16.8898	15.515	15.4144	15.3311	19.1181	13.0792	16.715	18.647	18.6103	18.2151	17.864	17.449	17.8579			16.8448	15.4202	16.3041	18.4908	17.7236
ATP8B3	0.7193	0.604917	0.850126	0.79486	0.583188	0.561809	0.782375	0.600567	0.881564	0.599994	0.700882	0.553618	0.859546	0.726716	0.925525			0.724781	0.646619	0.754835	0.618165	0.837262
ATP8B4	0.4773	0.347058	0.41667	0.469904	0.539728	0.36322	0.335368	0.300379	0.39598	0.395248	0.426661	0.422656	0.411656	0.38277	0.413028			0.413676	0.457617	0.343909	0.414855	0.402485
ATP9A	4.11651	4.04097	3.89719	4.50408	3.69273	3.56041	4.25343	3.60062	3.79979	5.07498	4.47908	4.90169	4.37777	4.48295	3.91274			4.01822	3.91907	3.88461	4.81858	4.25782
ATP9B	2.97526	2.85375	2.98356	3.01366	2.90889	3.01873	3.33539	2.77389	3.10604	2.88365	2.76271	3.27698	3.16447	3.13248	2.99938			2.93752	2.98043	3.07177	2.97445	3.09878
ATPAF1	19.1611	18.8024	20.636	16.2932	17.6525	17.2033	18.8765	22.1711	20.1817	23.8679	23.2884	21.8918	20.7258	20.25	20.9585			19.5332	17.0497	20.4098	23.016	20.6448
ATPAF2	8.10337	7.54874	8.19543	7.21498	7.68661	6.33119	7.19211	8.29381	8.30847	8.1946	7.17896	8.54493	9.23995	8.67327	8.12126			7.94918	7.07759	7.93146	7.97283	8.67816
ATPIF1	89.3947	100.242	96.4441	81.7025	98.7192	100.35	96.9193	118.682	91.3694	96.0829	108.99	94.3386	109.627	112.169	104.472			95.3603	93.5906	102.324	99.8038	108.756
ATR	7.48423	6.99286	7.73548	5.65765	6.12772	6.02199	7.15523	5.56481	7.89384	7.81272	7.77378	7.49076	7.87257	8.16715	8.1533			7.40419	5.93579	6.87129	7.69242	8.06434
ATRAID	64.1242	70.1074	70.1056	67.0461	71.4364	69.7429	68.5312	84.7528	71.9867	77.3425	71.7873	73.5307	70.6541	70.2164	68.8685			68.1124	69.4085	75.0902	74.2202	69.913
ATRIP	8.31075	7.84191	7.99164	6.02717	7.0714	7.89391	8.3741	8.30461	8.7713	8.25538	8.32027	8.2984	9.48816	9.38453	10.4936			8.0481	6.99749	8.48334	8.29135	9.78876
ATRN	16.2021	14.834	15.9218	14.7087	14.6146	14.873	15.8005	11.936	15.9595	17.0592	17.0633	17.3488	17.0127	17.7397	16.8701			15.6526	14.7321	14.5653	17.1571	17.2075
ATRNL1	0.431368	0.40453	0.482875	0.130439	0.224272	0.230433	0.345637	0.471362	0.348588	0.222186	0.224749	0.205258	0.356803	0.308503	0.324794			0.439591	0.195048	0.388529	0.217398	0.330033
ATRX	5.969	5.52565	6.3376	5.36459	5.38362	5.03067	6.06446	4.34879	6.6406	7.60632	7.0406	7.12813	6.71398	6.6608	6.28621			5.94408	5.25963	5.68462	7.25835	6.55366
ATXN1	1.15649	1.20817	1.05033	2.10576	1.74528	1.28198	0.967675	0.735598	1.02588	1.1439	0.938021	0.837899	0.914559	0.671565	0.757683			1.13833	1.71101	0.909718	0.973273	0.781269
ATXN10	74.0782	70.2493	74.6925	62.2073	65.1802	70.5844	67.1456	84.1893	75.1734	83.4642	78.8247	86.3378	83.1956	87.8767	84.6996			73.0067	65.9906	75.5028	82.8756	85.2573
ATXN1L	5.70027	5.94083	5.29614	7.1933	6.28022	5.66382	5.09324	3.85357	5.0677	4.62379	4.74101	4.56012	5.35122	5.32585	4.95633			5.64575	6.37911	4.6715	4.64164	5.21113
ATXN2	10.3931	10.5778	11.0851	10.3391	10.4678	10.3677	10.7017	9.37759	10.6674	11.3679	11.9564	12.1067	11.3003	11.123	10.8274			10.6853	10.3915	10.2489	11.8103	11.0836
ATXN2L	42.2682	46.5132	41.3183	47.6182	45.2839	46.3789	44.0486	37.2009	39.473	38.8259	39.2335	39.9599	43.1435	40.3558	39.3695			43.3666	46.427	40.2408	39.3398	40.9563
ATXN3	7.86206	7.10525	7.94617	8.58811	8.03161	6.99948	6.34026	6.49382	7.33381	8.38262	6.96673	7.87938	5.70333	7.43859	6.58221			7.63783	7.87307	6.72263	7.74291	6.57471
ATXN3L	0	0	0	0	0	0	0	0	0	0	0	0	0.0125094	0	0			0	0	0	0	0.0041698
ATXN7	4.45891	5.07692	4.23744	5.4335	4.50083	4.52921	4.92181	2.91122	4.67788	4.36564	4.2698	4.11603	4.59149	4.428	3.92289			4.59109	4.82118	4.1703	4.25049	4.31413
ATXN7L1	5.78245	5.45402	4.89253	4.83209	5.38481	5.87964	5.08645	3.83962	4.69591	4.10971	4.8143	4.34796	4.14085	4.91837	3.54094			5.37633	5.36551	4.54066	4.42399	4.20005
ATXN7L2	3.00658	2.75111	2.96746	3.2607	2.67723	2.82608	3.5936	3.67543	3.84802	2.58138	2.64031	2.52977	3.17894	3.18421	2.84727			2.90838	2.92134	3.70568	2.58382	3.07014
ATXN7L3	17.216	16.7993	17.3641	18.7376	18.0238	18.0799	19.0502	15.9878	16.9778	16.8821	15.2572	14.6599	16.6428	14.4508	15.8655			17.1265	18.2804	17.3386	15.5997	15.653
ATXN7L3B	14.669	14.8279	14.7627	13.3463	13.0992	13.2902	15.0304	14.7881	15.4251	13.9093	14.2477	16.1823	16.1012	15.6885	15.4461			14.7532	13.2452	15.0812	14.7798	15.7453
AUH	8.77323	6.87435	8.37488	6.91047	6.79792	7.43344	6.90793	4.29746	7.66881	7.47349	6.06421	8.49031	7.44199	9.25181	7.54427			8.00749	7.04728	6.2914	7.34267	8.07936
AUNIP	3.11072	2.73271	2.54335	1.6326	1.84786	2.39789	2.42619	2.79137	2.71599	2.4978	2.34747	3.01098	3.70025	3.41215	2.93871			2.79559	1.95945	2.64452	2.61875	3.35037
AUP1	93.4803	97.9459	89.8134	95.3273	99.925	98.829	94.6926	106.466	88.7913	84.4145	82.2403	84.4062	92.9868	94.5571	98.9771			93.7465	98.0271	96.65	83.687	95.507
AURKA	21.3985	19.2926	21.7892	10.8238	15.9483	14.9436	20.6335	23.7728	21.9863	28.7782	27.4015	26.4196	31.9516	30.3622	31.3283			20.8268	13.9052	22.1309	27.5331	31.214
AURKAIP1	89.5151	94.3688	88.2869	86.362	95.1547	96.151	95.9503	116.03	90.8364	91.2563	94.314	101.412	111.166	101.729	104.512			90.7236	92.5559	100.939	95.6608	105.802
AURKB	13.3706	12.4899	14.2814	7.87268	10.563	9.89548	12.2599	14.5177	11.8089	12.2128	13.4182	12.2664	16.3466	15.9573	16.8012			13.3806	9.44372	12.8622	12.6325	16.3684
AURKC	0.800006	0.643685	0.446373	1.01362	0.854389	0.761469	0.766491	0.59333	0.535022	0.477619	0.423047	0.552875	0.770073	1.12228	0.771859			0.630021	0.876493	0.631614	0.484514	0.888071
AUTS2	1.52704	1.55791	1.42733	1.18952	1.39322	1.29193	1.73052	1.31083	1.46327	1.51106	1.3795	1.55048	1.93334	1.83688	1.92319			1.50409	1.29156	1.50154	1.48035	1.8978
AVEN	18.6495	15.9983	15.816	17.1153	16.4988	18.3002	17.5937	17.6605	16.8944	16.1132	16.7236	18.228	19.4917	17.0555	16.1717			16.8213	17.3048	17.3829	17.0216	17.573
AVIL	0.826546	1.33825	0.807302	1.53002	1.04625	1.28088	0.563067	0.705791	0.635903	0.421906	0.317971	0.308338	0.465929	0.474256	0.445591			0.990699	1.28572	0.63492	0.349405	0.461925
AVL9	11.4244	12.6263	12.145	12.5104	11.6466	11.7339	11.6797	8.06416	10.6379	11.9675	10.6833	11.4349	10.9425	11.7957	9.81375			12.0652	11.9636	10.1273	11.3619	10.8506
AVP	0.00261069	0	0	0.0263496	0.00252618	0.00317768	0.00631537	0.00289499	0.000643422	0	0	0.00245946	0.00224804	0.0132754	0.0389681			0.00087023	0.0106845	0.00328459	0.00081982	0.0181638
AVPI1	5.10217	5.59328	5.26856	6.55816	6.12585	5.34217	5.71882	6.84838	7.12233	4.8756	6.4393	6.68606	5.28919	5.4884	4.84172			5.32134	6.00873	6.56318	6.00032	5.20644
AVPR1A	0	0	0	0.0100897	0	0	0	0	0	0.00363757	0	0	0	0.0245176	0			0	0.00336323	0	0.00121252	0.00817253
AVPR1B	0	0	0	0	0	0	0	0	0	0	0	0	0	0	0			0	0	0	0	0
AVPR2	0.00634162	0.00613646	0.0115633	0.0520138	0	0	0.0666472	0.0450955	0.0413511	0	0	0.0365504	0.0305859	0.0369782	0.0347928			0.00801379	0.0173379	0.0510313	0.0121835	0.034119
AWAT1	0	0	0	0	0	0	0	0	0	0	0	0	1.29181e-07	0	0			0	0	0	0	4.30603e-08
AWAT2	0.0352901	0	0	0	0	0	0	0	0	0	0	0	0.010082	0	0.0131751			0.0117634	0	0	0	0.00775237
AXDND1	0.0254984	0.0153833	0.0246232	0.0624336	0.018103	0.0793973	0.0208385	0.016051	0.000686969	0.0341043	0.0170312	0.0149923	0.0100415	0.032108	0.0310292			0.021835	0.0533113	0.0125255	0.0220426	0.0243929
AXIN1	10.3332	10.4686	9.8137	13.0402	12.0717	11.4464	12.1598	10.1414	9.43009	9.06239	9.37199	9.72722	10.9536	10.2799	9.44619			10.2052	12.1861	10.5771	9.3872	10.2266
AXIN2	0.889572	0.906462	0.829849	1.51501	0.993812	1.36648	1.0952	0.868901	1.08767	1.00137	0.977878	0.792381	1.36697	1.22181	1.17082			0.875294	1.29177	1.01726	0.923876	1.2532
AXL	206.574	206.469	204.68	193.649	209.335	212.216	225.69	181.506	187.492	175.208	178.483	176.198	187.067	183.146	185.389			205.908	205.067	198.229	176.63	185.201
AZGP1	0.0387679	0.0029613	0	0.0242062	0.00296124	0.0989613	0	0	0.00301693	0.0614492	0.189025	0.0999615	0.0626091	0.076339	0.00275494			0.0139097	0.0420429	0.00100564	0.116812	0.0472343
AZI2	30.1215	32.6469	28.1662	35.5667	31.6797	31.496	30.402	31.2775	27.3212	30.3614	31.8949	26.7615	24.166	27.8275	28.7659			30.3115	32.9141	29.6669	29.6726	26.9198
AZIN1	38.6694	40.0796	38.5572	39.3677	36.9622	36.3105	37.5194	37.2702	35.6547	39.437	37.3362	38.1085	39.5679	38.6829	39.0436			39.1021	37.5468	36.8148	38.2939	39.0981
AZIN2	1.34325	1.47966	0.717363	1.39764	1.50176	1.08888	1.69587	1.48528	0.98558	1.44968	1.37675	1.52039	1.37521	1.12862	1.2999			1.18009	1.32943	1.38891	1.44894	1.26791
AZU1	0.0651845	0.0465859	0.0257348	0.00644182	0.00682841	0.0171789	0.162578	0.19938	0.04183	0.113132	0.0551156	0.0797775	0.123057	0.0259312	0.065033			0.0458351	0.0101497	0.134596	0.082675	0.0713404
B2M	1788.56	2016.19	1816.8	2263.3	2006.92	2089.43	1910.29	2288.61	1997.37	1385.14	1462.22	1396.89	1337.19	1490.25	1514.74			1873.85	2119.88	2065.42	1414.75	1447.39
B3GALNT1	3.79521	4.05683	4.64905	3.98866	3.85576	3.58601	3.88337	4.55766	4.3743	3.98736	4.34053	3.77583	3.80377	3.6803	3.49538			4.16703	3.81014	4.27178	4.03457	3.65982
B3GALNT2	12.0545	11.1167	11.8142	10.3643	11.2389	10.0983	12.7318	10.2032	11.2898	13.7771	13.948	13.0097	11.8571	12.7635	12.8732			11.6618	10.5672	11.4083	13.5783	12.4979
B3GALT1	0.119494	0.0701874	0.000177379	0.0680083	0.0541647	0.000661104	0.000431426	0.0399102	0.0549826	0.0183464	0.0166633	0.0134845	0.0512508	0.0688451	0.0386658			0.0632863	0.0409447	0.0317747	0.0161647	0.0529206
B3GALT2	0	6.38859e-32	0	5.94114e-105	0	0.0215679	0	0	0	0.0988336	0	0.0445543	2.21986e-58	5.76623e-17	0			2.12953e-32	0.0071893	0	0.047796	1.92208e-17
B3GALT4	0.395155	0.321293	0.276887	0.685646	0.294161	0.392766	0.584104	0.252621	0.299561	0.238858	0.221014	0.368876	0.372517	0.306164	0.136682			0.331112	0.457524	0.378762	0.276249	0.271788
B3GALT5	0	0	0.0424471	0.0106156	0.000546486	0	0.000683099	0	0.000556763	0	0.0135416	0	0.0527892	0.0106843	0.0341336			0.014149	0.0037207	0.000413287	0.00451387	0.0325357
B3GALT6	5.44051	4.82317	5.2868	4.9267	4.80205	4.53367	5.24068	5.56361	5.19211	5.11434	5.46232	5.55502	5.90972	5.40695	6.12938			5.18349	4.75414	5.33213	5.37723	5.81535
B3GALTL	1.5634	2.0826	2.09902	2.14469	1.70489	1.62837	1.76361	1.86409	1.96761	2.2478	1.91956	2.18032	2.21926	2.16516	2.25883			1.91501	1.82598	1.8651	2.11589	2.21442
B3GAT1	0	0.000816904	0	0.0319216	0	0	0.0102911	0.0386477	0.0685723	0	0.000982981	0.00797089	0.00290778	0.000775541	0.000759978			0.000272301	0.0106405	0.0391704	0.00298462	0.0014811
B3GAT2	0.000663007	0.00085485	0.0340209	0.00144411	0.0021389	0.000358767	0.00142618	0.00212539	0.0181957	0.00043677	0.00200081	0.00439821	0.00159073	0.00117437	0.00115011			0.0118463	0.00131393	0.00724909	0.0022786	0.00130507
B3GAT3	31.3193	31.7402	29.6599	29.5286	30.4295	30.5757	33.173	36.2562	34.3382	28.5328	29.4914	31.4135	35.7173	32.4742	35.5086			30.9065	30.1779	34.5891	29.8126	34.5667
B3GNT2	11.8599	12.6216	11.5557	15.8513	15.7486	14.5103	11.3393	8.79011	10.4285	10.4405	10.0162	9.92017	8.93656	12.7384	11.9892			12.0124	15.3701	10.186	10.1256	11.2214
B3GNT3	0	0	0.00828765	0.00276603	0.00293203	0	0.0018325	0.000420009	0.0293359	0.00149589	0.00176409	0.00570918	0.0213245	0.00139181	0.0403049			0.00276255	0.00189935	0.0105295	0.00298972	0.0210071
B3GNT4	0.281485	0.223814	0.118325	0.197053	0.162629	0.202818	0.154019	0.154541	0.0930088	0.152122	0.168536	0.154387	0.231548	0.293257	0.18994			0.207875	0.1875	0.133856	0.158348	0.238248
B3GNT5	22.5082	22.2771	22.0042	25.4442	22.735	19.9814	21.2071	15.4699	20.903	16.1615	17.6479	17.0051	17.4678	17.4647	18.5104			22.2632	22.7202	19.1933	16.9382	17.8143
B3GNT6	0.00378263	0	0	0.021788	0.00366018	0	0.00457517	0	0	0	0	0.0111602	0.0388301	0.027193	0.00681038			0.00126088	0.00848273	0.00152506	0.00372007	0.0242778
B3GNT7	0.0252992	0.0343375	0.0657021	0.129355	0.136674	0.0680817	0.21441	0.112329	0.262941	0.0277361	0.0836282	0.0542984	0.0232022	0.0315582	0.037993			0.0417796	0.11137	0.19656	0.0552209	0.0309178
B3GNT8	2.5911	3.38497	2.12762	4.05574	4.30244	3.73416	3.1799	2.61006	2.53133	2.8938	1.34629	1.70041	1.23314	1.57833	1.09048			2.70123	4.03078	2.77376	1.98017	1.30065
B3GNT9	5.20546	6.23099	5.08545	6.22023	6.19334	5.65885	5.84746	5.46043	5.23675	6.27752	5.64827	5.71248	5.38983	4.98411	5.51175			5.5073	6.02414	5.51488	5.87942	5.29523
B3GNTL1	3.82319	4.11011	3.52648	3.47199	3.37782	4.14732	4.30178	5.21258	4.03966	3.78996	3.30775	4.48633	4.58437	4.22784	5.07285			3.81993	3.66571	4.51801	3.86135	4.62835
B4GALNT1	0.468642	0.317845	0.368488	0.174658	0.321829	0.370613	0.532632	0.537159	0.734666	0.455005	0.421977	0.478486	0.559495	0.310021	0.449464			0.384992	0.289033	0.601486	0.451823	0.43966
B4GALNT2	0.230597	0.25767	0.0734257	0.393896	0.187772	0.368745	0.233165	0.475802	0.332307	0.211123	0.158487	0.186109	0.387851	0.59965	0.239327			0.187231	0.316804	0.347091	0.18524	0.408943
B4GALNT3	0.00499151	0.0145694	0.00556201	0.0606437	0.0340457	0.0342909	0.00301866	0.0312806	0.0516224	0.0899104	0.0359655	0.0586456	0.0360381	0.0159627	0.0294299			0.00837431	0.0429934	0.0286406	0.0615072	0.0271436
B4GALNT4	0.973297	0.773383	0.766673	0.575808	0.712528	0.659912	1.8886	1.31702	1.35909	0.861464	0.932174	0.746661	0.746272	0.581226	0.615652			0.837784	0.649416	1.52157	0.846766	0.647717
B4GALT1	31.823	32.2941	31.4367	41.0158	38.9882	37.987	29.2118	29.8698	29.2806	45.1474	42.565	48.1993	33.0842	32.7961	32.1369			31.8513	39.3303	29.4541	45.3039	32.6724
B4GALT2	46.3482	49.3273	45.0919	44.7011	48.294	46.2195	49.959	46.4055	46.822	47.9207	49.6568	50.6903	50.6769	48.4869	50.559			46.9225	46.4049	47.7288	49.4226	49.9076
B4GALT3	15.3681	16.0405	15.8057	18.9397	16.8403	16.8478	16.3065	18.9825	16.2222	15.964	14.3196	16.2401	18.3752	16.1169	17.6299			15.7381	17.5426	17.1704	15.5079	17.374
B4GALT4	7.95484	7.85725	7.06626	7.93882	7.96205	8.04054	7.57758	7.86533	7.58758	8.4107	7.50077	8.69537	8.62672	8.41859	8.79025			7.62612	7.98047	7.67683	8.20228	8.61185
B4GALT5	15.7363	16.2192	14.7629	17.4855	17.4287	15.9138	14.9375	13.8906	14.7212	12.9668	13.68	13.3266	13.1683	13.2114	13.0273			15.5728	16.9427	14.5164	13.3245	13.1357
B4GALT6	0.624626	0.845856	1.16788	0.920801	0.667198	0.522304	0.772461	0.759088	0.58459	1.51298	0.904988	0.925984	1.13177	1.45122	1.03706			0.879454	0.703434	0.70538	1.11465	1.20668
B4GALT7	20.2708	19.3067	17.8821	21.0116	20.7854	20.6946	18.7946	18.2027	20.2744	22.3962	25.0894	22.9803	21.393	22.1003	22.7553			19.1532	20.8305	19.0906	23.4886	22.0829
B4GAT1	7.88223	7.77306	7.33734	5.90726	6.62661	7.59454	8.17374	9.55078	8.3994	9.88062	10.1341	10.4072	9.95643	9.05475	9.33433			7.66421	6.70947	8.70797	10.1406	9.4485
B9D1	7.36065	7.96078	9.01959	5.44157	7.61076	7.0481	7.73842	8.1974	6.96682	9.52474	10.8993	9.88149	8.73039	8.58184	9.35199			8.11367	6.70014	7.63421	10.1018	8.88807
B9D2	8.63792	7.40788	8.32947	6.07796	7.74093	6.17574	11.4111	9.24642	8.65446	9.44822	7.08981	8.12763	8.08509	9.61844	8.98641			8.12509	6.66488	9.77066	8.22189	8.89665
BAALC	12.6998	9.83664	5.92916	5.22497	4.67983	3.67052	4.15395	6.27375	4.28226	11.5794	19.2026	7.89787	6.77492	6.85169	5.32043			9.48853	4.52511	4.90332	12.8933	6.31568
BAAT	0.217862	0.314974	0.0321764	0.218471	0.207581	0.227759	0.0656396	0.0392781	0.043667	0.0826963	0.0635289	0.0165941	0.0954696	0.150668	0.0744272			0.188337	0.217937	0.0495282	0.0542731	0.106855
BABAM1	31.9527	34.8573	33.3728	28.0529	31.3155	32.2583	35.463	35.7483	33.2362	35.6241	34.7582	36.0048	36.4717	34.584	36.2957			33.3943	30.5422	34.8158	35.4624	35.7838
BACE1	18.0099	15.4079	13.9853	16.8993	16.4393	15.5925	16.2351	12.774	15.8011	20.4276	18.0867	19.3817	18.1413	19.0489	18.0715			15.801	16.3104	14.9367	19.2987	18.4206
BACE2	15.8584	14.9385	17.2171	15.6074	15.4354	17.4735	15.1656	16.5796	15.5079	14.6152	14.426	14.1174	16.2966	16.5567	14.8743			16.0047	16.1721	15.751	14.3862	15.9092
BACH1	10.9549	12.4302	9.93774	13.7388	11.5812	10.9169	9.6647	7.20518	9.29866	7.2446	7.88951	7.78072	8.26396	7.86125	7.94499			11.1076	12.079	8.72285	7.63828	8.0234
BACH2	0.254579	0.26568	0.19937	0.4779	0.396849	0.265348	0.267238	0.107004	0.145904	0.0393751	0.0281722	0.0341147	0.0485024	0.055436	0.0479221			0.239876	0.380032	0.173382	0.0338873	0.0506202
BAD	27.6548	26.7165	25.9349	22.6696	26.0473	25.7587	28.672	32.3396	25.5607	29.4176	28.322	28.4057	30.2172	27.0004	29.1996			26.7687	24.8252	28.8574	28.7151	28.8057
BAG1	21.4096	23.1256	25.4822	24.452	25.8722	23.3002	21.2802	27.9179	23.2025	21.1675	21.7848	23.1166	21.6553	21.8554	21.8092			23.3391	24.5415	24.1335	22.023	21.7733
BAG2	46.7309	47.6997	46.856	32.0329	35.3801	38.4827	47.4654	51.243	49.603	62.1732	59.71	60.6769	55.9038	55.9502	54.7512			47.0955	35.2986	49.4371	60.8534	55.5351
BAG3	52.9735	56.9286	51.5182	65.6263	60.6467	62.2622	61.8469	58.4636	54.6594	54.5276	54.2011	58.1385	49.937	53.0567	54.9582			53.8068	62.8451	58.3233	55.6224	52.6506
BAG4	6.18181	5.83097	6.38126	6.58129	6.58561	6.51633	7.30471	5.5398	6.84843	8.44438	7.66503	7.71913	6.67559	7.37215	7.3209			6.13135	6.56108	6.56431	7.94285	7.12288
BAG5	11.3466	10.847	11.3479	12.2241	12.3349	11.0489	10.3168	8.57817	11.5444	11.9392	10.7318	10.2646	11.3615	11.0012	11.1033			11.1805	11.8693	10.1465	10.9785	11.1553
BAG6	52.2021	52.2929	53.1858	54.7077	53.0375	54.9248	50.2662	48.7504	50.1269	53.7874	54.006	53.6191	53.9992	53.0302	52.7258			52.5603	54.2233	49.7145	53.8042	53.2517
BAGE2	0.000122149	0.000234754	0.181465	0.00772028	0.0147709	1.16685e-71	0.000296669	0.000269018	0.0493075	0.0330385	0.0291189	0.0236738	0.0230535	0.00776938	0.00750427			0.0606073	0.00749706	0.0166244	0.0286104	0.0127757
BAHCC1	1.684	1.69952	1.74853	1.66616	1.67929	1.672	2.21153	1.2625	1.85678	1.44862	1.62917	1.4484	1.89852	1.61701	1.53944			1.71068	1.67248	1.77694	1.50873	1.68499
BAHD1	10.5192	11.3358	11.8335	9.96712	11.4554	10.5554	12.9927	9.35986	12.2643	11.8846	10.2563	9.42881	10.9449	11.2446	12.1555			11.2295	10.6593	11.539	10.5232	11.4483
BAIAP2	14.8399	15.8416	14.2149	16.4419	14.8862	16.1124	22.2587	17.9734	17.2676	13.9627	13.0245	14.1215	15.5352	13.9981	17.2376			14.9655	15.8135	19.1666	13.7029	15.5903
BAIAP2L1	3.04487	2.81201	2.90511	2.64956	2.78202	2.69122	2.91858	3.42764	3.30248	3.74733	3.68834	3.93577	3.62514	3.62001	3.68781			2.92066	2.7076	3.21623	3.79048	3.64432
BAIAP2L2	4.01752	4.79062	4.10297	5.16959	5.09553	4.78612	3.63344	4.1995	3.20149	3.25617	2.46323	3.54168	3.12845	3.31967	3.54495			4.3037	5.01708	3.67814	3.08703	3.33102
BAIAP3	0.124855	0.13835	0.0543736	0.218738	0.138542	0.131696	1.67933	1.16972	1.70108	0.117135	0.133694	0.143075	0.216891	0.139427	0.122552			0.10586	0.162992	1.51671	0.131301	0.159623
BAK1	17.0176	18.9452	16.1093	18.6788	21.9176	17.9222	19.1137	17.6387	16.3792	17.0228	13.7547	13.922	13.7565	13.8667	15.2862			17.3574	19.5062	17.7105	14.8998	14.3031
BAMBI	0.969618	1.13065	0.626238	2.7437	2.40808	1.72565	0.485717	0.702058	0.580511	5.54112	5.14132	4.78267	0.396815	0.721057	0.487394			0.908835	2.29248	0.589429	5.15504	0.535089
BANF1	88.1782	111.253	132.049	84.0276	105.908	104.448	105.737	128.517	104.245	94.0354	114.911	104.84	120.75	114.121	110.692			110.493	98.1279	112.833	104.595	115.188
BANF2	0	0	0	0.00061072	0	0	0	0	0.000659545	0.000660562	0	0	0.000460874	0	0.000602271			0	0.000203573	0.000219848	0.000220187	0.000354382
BANK1	0.231671	0.254168	0.223826	0.174803	0.0791338	0.15613	0.33002	0.337125	0.107635	0.0538402	0.018774	0.105595	0.027347	0.0440733	0.0504818			0.236555	0.136689	0.25826	0.0594031	0.040634
BANP	5.32654	6.39323	5.35953	5.89664	5.33779	6.12717	5.66848	4.98907	5.44972	4.7518	4.82043	4.65141	5.23251	5.52361	4.83835			5.6931	5.7872	5.36909	4.74121	5.19816
BAP1	19.742	19.2204	19.1936	19.933	19.8435	20.7887	20.6032	18.0735	20.1203	19.0282	17.9019	18.4708	19.9196	20.5947	19.5356			19.3853	20.1884	19.599	18.467	20.0166
BARD1	1.59249	1.6907	1.42211	1.29353	1.31526	1.19361	1.70111	1.74161	1.51203	2.16019	1.87949	1.80805	2.16288	1.76223	1.74819			1.56843	1.26747	1.65158	1.94924	1.8911
BARHL1	0	0	0.00688331	0.003446	0.0146112	0	0.0437892	0	0	0.00372723	0.00439551	0.00355632	0.00520098	0.0150263	0.0203899			0.00229444	0.00601907	0.0145964	0.00389302	0.0135391
BARHL2	0	0	0	0	0	0	0	0	0	0	0	0	0.0403992	0	0			0	0	0	0	0.0134664
BARX1	0.0660511	0	0.0401433	0.121744	0.0477602	0.121586	0.197263	0.1221	0.0868152	0.222983	0.264648	0.170623	0.0342371	0.0202248	0			0.0353981	0.0970301	0.135393	0.219418	0.018154
BARX2	0	0.000884513	0	0.000333768	0.0391515	0	0	0	0	0.0199657	0	0	0.0278691	0	0			0.000294838	0.0131618	0	0.00665523	0.0092897
BASP1	68.9857	69.205	67.9958	66.7613	69.2845	68.2385	66.0099	76.6902	66.5682	62.6106	65.6828	67.1142	77.1788	71.7604	71.1227			68.7288	68.0948	69.7561	65.1359	73.354
BATF	0.611502	0.996567	1.03906	0.626173	0.554757	0.418715	0.971565	0.510147	1.20107	0.22649	0.489766	0.396224	0.866793	0.946667	1.55709			0.882376	0.533215	0.894261	0.370827	1.12352
BATF2	17.9547	23.2417	17.2467	19.447	18.6403	20.6771	19.3389	18.3782	17.5616	4.63542	6.15487	6.08341	2.03382	5.38395	4.84641			19.481	19.5881	18.4262	5.62457	4.08806
BATF3	8.95654	9.87123	6.61683	7.78909	8.18157	9.18283	10.3451	9.26542	8.43731	5.54105	6.15405	5.06761	8.05272	8.56707	7.18638			8.48153	8.3845	9.34928	5.58757	7.93539
BAX	136.676	149.538	146.66	128.286	131.863	144.104	138.547	169.351	133.784	120.191	132.44	123.011	157.321	132.791	153.623			144.291	134.751	147.227	125.214	147.912
BAZ1A	22.1855	20.7376	23.4504	21.789	21.6538	21.0079	20.746	19.0743	21.7359	20.4674	19.4708	20.6716	21.8685	22.8224	21.9733			22.1245	21.4836	20.5187	20.2033	22.2214
BAZ1B	25.7501	24.5833	25.9046	23.3525	23.8987	23.0076	24.8945	17.661	25.3826	24.4733	24.7302	23.4148	27.0949	25.4896	26.3374			25.4127	23.4196	22.646	24.2061	26.3073
BAZ2A	15.6235	16.1448	15.1838	18.5671	16.7967	16.4444	16.0753	10.0801	14.3096	13.818	13.6237	13.123	12.8593	13.0217	13.1321			15.6507	17.2694	13.4883	13.5216	13.0044
BAZ2B	1.86227	1.8206	1.96093	1.99913	1.61632	1.7313	1.4248	1.05524	1.24815	1.66622	1.52841	1.66548	1.58606	1.49579	1.51812			1.88127	1.78225	1.24273	1.62004	1.53332
BBC3	14.5944	14.3851	10.829	15.1496	16.7284	15.2103	17.2791	14.7779	10.6354	8.82756	7.51969	8.10321	7.43888	11.0167	8.36034			13.2695	15.6961	14.2308	8.15015	8.93864
BBIP1	13.8696	22.5486	20.3192	16.802	15.3176	33.8959	15.0956	34.9717	23.3088	21.4106	26.0991	23.6583	27.5977	14.1525	21.8228			18.9125	22.0052	24.4587	23.7227	21.191
BBOX1	0.0286369	0.0331711	0.0314337	0.176707	0.229245	0.143189	0.040159	0.00358502	0.00637436	0.00574577	0.00639952	0.00670059	0.00489967	0.00623702	0.00596634			0.0310806	0.183047	0.0167061	0.00628196	0.00570101
BBS1	3.92869	4.0464	3.64759	3.87686	3.74968	3.938	3.34754	3.26706	3.37311	3.90456	3.86226	3.36227	3.92693	3.48392	3.87665			3.87423	3.85485	3.32924	3.7097	3.7625
BBS10	4.77387	4.64989	5.36979	4.63117	4.73979	3.9088	5.29411	4.83344	4.55621	5.24366	4.62118	5.28385	5.56209	5.38147	5.22859			4.93118	4.42659	4.89459	5.04956	5.39072
BBS12	2.65479	2.34256	3.24054	2.47513	2.76284	2.33802	2.34175	2.79577	2.47385	2.14686	2.64985	2.26554	1.9469	2.3307	2.0077			2.74596	2.52533	2.53712	2.35408	2.0951
BBS2	12.3229	11.3625	12.5344	11.5566	10.5463	10.8639	12.1337	12.5401	13.074	14.1008	13.7125	12.9855	14.7077	14.0776	13.6474			12.0733	10.9889	12.5826	13.5996	14.1442
BBS4	6.61709	5.23658	4.81656	4.26953	4.56549	4.37739	4.29027	4.97387	5.28903	5.79514	5.38393	6.3293	5.04487	5.28129	4.85396			5.55674	4.40414	4.85106	5.83612	5.06004
BBS5	7.0066	6.11097	7.50603	5.87987	6.3921	5.14234	5.12206	5.51281	6.26136	8.18843	6.19813	7.55689	6.04585	6.90136	6.91202			6.87453	5.80477	5.63208	7.31448	6.61974
BBS7	9.61731	9.77638	9.54008	8.86124	8.30139	7.90418	8.34746	8.88323	9.68333	11.0667	10.5122	10.4321	10.1956	10.6308	9.68329			9.64459	8.3556	8.97134	10.6703	10.1699
BBS9	4.31107	3.953	4.18083	4.05797	3.89946	3.49745	3.4497	4.30092	4.39979	4.77638	4.60723	5.01742	4.28924	4.37577	4.39247			4.1483	3.81829	4.05014	4.80034	4.35249
BBX	9.37274	9.33264	9.18937	9.17046	8.91939	8.00864	9.18889	7.326	9.92014	12.3306	11.7408	11.4185	9.4334	9.29	9.47151			9.29825	8.6995	8.81168	11.83	9.3983
BCAM	3.55418	3.55336	3.3494	2.9324	3.75816	2.58573	4.34691	4.65676	5.05476	5.08291	5.74788	5.60245	4.29254	3.72154	4.13652			3.48565	3.0921	4.68614	5.47775	4.0502
BCAN	0.0234973	0.00312847	0.0176855	0.017514	0.0150543	0.00787044	0.0436538	0.0446144	0.0563181	0.00881356	0.0105453	0.0241663	0.0443599	0.0167113	0.053569			0.0147704	0.0134796	0.0481954	0.0145084	0.0382134
BCAP29	85.9405	77.114	83.3652	69.8985	71.8149	65.4659	72.1639	91.6695	93.4549	81.4088	77.621	75.563	81.0558	80.4332	74.5124			82.1399	69.0598	85.7628	78.1976	78.6671
BCAP31	115.351	110.35	119.109	118.006	121.314	115.879	114.833	132.179	106.873	122.475	115.292	122.965	115.324	114.881	114.745			114.937	118.4	117.962	120.244	114.983
BCAR1	41.5486	44.2361	38.3662	49.5795	47.3766	47.236	46.8771	36.2572	36.983	36.5238	37.8118	39.294	40.2069	38.1676	38.6816			41.3836	48.064	40.0391	37.8765	39.0187
BCAR3	35.5437	33.5667	33.3409	28.9852	29.9292	29.1965	32.8109	36.7958	30.6923	29.6376	27.2104	28.9454	34.484	38.1908	34.0564			34.1504	29.3703	33.433	28.5978	35.5771
BCAS1	0.0105486	0.0194808	0.0389339	0.0384534	0.0251832	0.0104553	0	0.0285975	0.052247	0.0396411	0.0833559	0.0198763	0.15275	0.155523	0.170865			0.0229878	0.0246973	0.0269482	0.0476244	0.159713
BCAS2	23.0816	23.7295	23.3084	22.9148	22.6929	22.7437	21.4364	24.7676	25.5439	24.7826	22.6759	24.0343	24.321	25.7488	21.5533			23.3732	22.7838	23.916	23.8309	23.8744
BCAS3	3.1067	2.99457	3.32995	5.23667	4.79225	4.67344	3.15643	3.21746	2.75877	3.26521	3.46754	3.17448	3.21702	3.0733	3.28445			3.14374	4.90079	3.04422	3.30241	3.19159
BCAS4	10.127	10.762	11.2238	12.5664	12.8868	12.3816	11.8546	12.0705	11.1938	11.7418	12.1544	10.9997	11.6947	11.1575	12.3885			10.7043	12.6116	11.7063	11.632	11.7469
BCAT1	12.6412	10.8881	11.8329	10.3476	10.0233	9.22082	11.8687	11.5562	11.6747	10.122	10.2504	9.84408	10.9883	11.7575	11.3172			11.7874	9.86391	11.6999	10.0722	11.3543
BCAT2	22.5835	23.5486	21.2556	16.421	20.3894	20.9227	23.5161	26.6466	22.018	27.7594	27.7381	27.2774	30.3838	27.6307	29.092			22.4626	19.2444	24.0602	27.5916	29.0355
BCCIP	77.6203	78.4381	87.2235	65.7267	73.5935	71.3812	74.3136	92.5998	85.1896	102.339	99.2617	102.255	90.698	96.0926	98.5934			81.094	70.2338	84.0343	101.285	95.128
BCDIN3D	2.49352	3.12491	3.13781	2.97909	2.38682	2.40304	2.28733	2.76806	1.6652	2.65918	2.03151	1.85379	2.23363	2.20049	2.32203			2.91875	2.58965	2.2402	2.18149	2.25205
BCHE	0.212267	0.457879	0.256053	0.144441	0.188917	0.152528	0.255695	0.307174	0.329875	0.38109	0.285969	0.384424	0.363262	0.299045	0.315166			0.308733	0.161962	0.297581	0.350494	0.325824
BCKDHA	34.8528	38.9394	41.1798	39.6278	41.2592	44.4854	43.6686	40.9199	38.4998	41.709	42.982	43.1936	38.3864	36.2361	40.197			38.324	41.7908	41.0294	42.6282	38.2732
BCKDHB	9.98388	8.51322	11.5292	8.23716	8.2141	8.14528	8.5423	9.49434	11.1062	11.7412	12.5606	11.4686	11.7033	10.6434	10.9476			10.0088	8.19885	9.71428	11.9235	11.0981
BCKDK	39.3322	41.0942	41.0253	39.7712	41.9633	44.1831	43.7314	42.1651	34.3853	40.5888	40.4112	41.2437	41.0595	39.9898	41.2573			40.4839	41.9725	40.0939	40.7479	40.7689
BCL10	45.1413	46.7068	43.8672	54.5112	49.6549	43.3797	42.6492	50.9496	43.7734	37.5328	36.1753	35.7163	39.1458	39.9661	39.0471			45.2384	49.1819	45.7907	36.4748	39.3863
BCL11A	0.0623309	0.234417	0.0919584	0.120451	0.111327	0.196831	0.133648	0.343049	0.184534	0.105796	0.144574	0.142998	0.296261	0.149756	0.0590696			0.129569	0.14287	0.22041	0.131123	0.168362
BCL11B	0.0958108	0.0484245	0.0772093	0.16636	0.117893	0.0843358	0.122159	0.123905	0.0761	0.0571274	0.0673441	0.059025	0.0876592	0.102651	0.104096			0.0738149	0.122863	0.107388	0.0611655	0.0981354
BCL2	0.417449	0.291904	0.296002	0.363199	0.401677	0.25171	0.230826	0.206632	0.361711	0.301148	0.278706	0.264664	0.391766	0.277087	0.544569			0.335118	0.338862	0.26639	0.281506	0.404474
BCL2A1	2.31977	1.6216	2.84	2.23282	1.48826	1.4275	1.3273	2.41996	1.48532	1.53357	1.33517	0.777315	3.08408	2.84065	3.28278			2.26046	1.71619	1.74419	1.21535	3.06917
BCL2L1	122.011	120.928	115.81	103.214	101.489	115.506	125.173	111.868	117.967	101.008	103.729	107.559	119.163	113.566	119.692			119.583	106.736	118.336	104.099	117.474
BCL2L10	0.121269	0.33159	0.0747333	0.11126	0.118667	0.2475	0.190391	0.293733	0.205345	0.122941	0.440794	0.309747	0.15365	0.199311	0.20243			0.175864	0.159142	0.229823	0.291161	0.18513
BCL2L11	0.869006	0.953417	0.747815	1.61281	0.669049	0.888153	1.50494	1.61278	0.763213	0.779973	0.725584	1.74843	0.748455	1.4011	1.67939			0.856746	1.05667	1.29364	1.08466	1.27632
BCL2L12	16.8501	15.6294	15.2444	12.3202	15.5403	13.6258	16.583	18.9671	17.214	16.8096	19.3051	18.3	20.0543	19.8587	18.8519			15.908	13.8288	17.588	18.1382	19.5883
BCL2L13	26.9275	29.684	27.1848	30.0392	27.9833	28.0116	28.6404	27.017	26.5212	27.2455	26.7322	24.5288	23.474	23.7624	24.597			27.9321	28.678	27.3929	26.1688	23.9445
BCL2L14	0.00283147	0.00109595	0.00309773	0.0383875	0.00273981	0.00137856	0.000684944	0.00313977	0.0016748	0.00167738	0	0.0048014	0.0105397	0.00520227	0.0166973			0.00234172	0.0141686	0.00183317	0.00215959	0.0108131
BCL2L15	0.0236202	0.113692	0	0.0376399	0.0574786	0.0192441	0.236095	0.00659327	0.0173934	0.0232603	0.013724	0.0279206	0.0364891	0.0451805	0.010643			0.0457707	0.0381209	0.0866939	0.021635	0.0307709
BCL2L2	14.8108	15.3264	14.5715	17.3498	16.4442	16.8726	12.2078	13.6194	13.805	13.4668	12.9953	12.6518	11.5999	12.099	11.6712			14.9029	16.8889	13.2107	13.038	11.79
BCL2L2-PABPN1	18.3901	17.4703	17.4961	20.6324	21.091	21.2916	18.1697	23.2109	16.7568	19.6049	19.1072	17.6386	19.6227	19.5839	20.1402			17.7855	21.005	19.3791	18.7836	19.7823
BCL3	15.8198	20.2539	16.2912	22.4404	23.4323	24.5236	18.2386	20.2627	15.578	21.91	25.5842	25.1705	14.1909	13.6659	13.57			17.455	23.4654	18.0264	24.2216	13.8089
BCL6	21.4933	23.7045	19.0722	32.759	26.5128	26.835	20.1555	16.6598	18.8619	24.9666	24.4846	24.3837	17.0222	16.2862	16.0051			21.4233	28.7023	18.5591	24.6116	16.4378
BCL6B	0.0592505	0.110479	0.0463015	0.156175	0.0433556	0.10303	0.174098	0.112637	0.13552	0.0472055	0.0591342	0.0211431	0.0349852	0.104974	0.102605			0.0720103	0.100854	0.140752	0.0424943	0.0808547
BCL7A	5.21076	4.27587	5.12115	5.04958	4.43482	4.53121	5.56258	3.96139	3.69997	2.91027	2.51593	2.63212	4.79049	3.5662	4.0294			4.86926	4.67187	4.40798	2.68611	4.1287
BCL7B	25.7003	27.0778	26.7086	27.486	27.4973	29.894	25.4296	26.911	27.2147	23.045	24.5335	21.1972	27.954	27.1214	26.8739			26.4956	28.2924	26.5184	22.9252	27.3164
BCL7C	39.4979	34.5936	37.0233	31.6999	37.8609	35.1776	35.625	40.6612	36.9645	36.4674	34.3465	39.0298	40.3876	39.2483	38.0145			37.0383	34.9128	37.7502	36.6146	39.2168
BCL9	1.61476	1.54522	1.84764	1.46885	1.21621	1.43814	1.90614	1.35892	1.6067	1.83568	1.97755	1.99458	2.06632	1.76884	1.82213			1.66921	1.3744	1.62392	1.93594	1.88576
BCL9L	25.2612	25.451	22.9195	28.7306	27.5493	26.9696	25.7683	19.1535	23.4761	27.8412	28.0513	28.7194	22.8733	22.3397	23.1172			24.5439	27.7498	22.7993	28.204	22.7767
BCLAF1	33.821	34.5709	38.3484	30.9831	30.1667	29.3776	28.9177	24.2329	33.7626	40.5302	37.2118	33.9002	35.9846	34.0056	35.8238			35.5801	30.1758	28.9711	37.2141	35.2713
BCO1	0	0.000519839	0	0.558346	0.415097	0.347204	0	0	0.000662005	0.117189	0.298539	0.118408	0.0703093	0.151232	0.119755			0.00017328	0.440216	0.000220668	0.178045	0.113765
BCO2	0.279805	0.211314	0.162926	0.248217	0.0983818	0.299072	0.211999	0.248909	0.175183	0.146958	0.190387	0.236909	0.243938	0.239879	0.220377			0.218015	0.215224	0.21203	0.191418	0.234731
BCOR	4.80794	4.8103	4.56626	5.96563	5.28605	5.09668	5.1138	3.1662	4.83256	5.15604	5.0253	5.39389	4.41189	4.4858	4.52618			4.72817	5.44945	4.37085	5.19174	4.47462
BCORL1	2.39565	2.40807	2.17217	2.67271	2.51589	2.42244	2.72719	1.62753	2.25405	2.82854	2.71453	2.63359	2.42122	2.15402	2.45921			2.3253	2.53701	2.20292	2.72555	2.34482
BCR	9.27981	8.7205	8.62528	8.53631	8.33508	8.15006	10.1432	7.18661	10.3603	9.19122	9.41338	8.82855	10.09	9.37861	9.35693			8.8752	8.34048	9.23004	9.14438	9.60851
BCS1L	27.0229	26.4399	28.011	23.2119	24.7018	27.8445	26.9856	33.8077	27.1855	28.9467	28.1491	29.4556	29.7282	29.3316	29.6291			27.1579	25.2527	29.3263	28.8505	29.563
BDH1	5.18026	5.1197	5.7408	3.00397	5.26561	3.31531	7.61447	5.18384	4.5208	5.23361	6.67543	7.28518	8.08327	5.68527	7.15039			5.34692	3.86163	5.77304	6.39807	6.97298
BDH2	16.8159	17.4099	15.0584	16.0536	15.4311	15.4942	19.104	17.7728	18.7042	13.8734	16.3474	16.743	15.7768	16.6989	15.9903			16.4281	15.6596	18.527	15.6546	16.1553
BDKRB1	0.489379	0.499406	0.654902	0.59848	0.522018	0.624575	0.595857	0.484386	0.483984	1.4356	1.56339	1.93767	0.428141	0.428337	0.74358			0.547896	0.581691	0.521409	1.64555	0.533353
BDKRB2	0.183784	0.136203	0.243992	0.246769	0.211137	0.284789	0.151695	0.167743	0.222994	0.51644	0.577493	0.711874	0.179551	0.157919	0.129243			0.187993	0.247565	0.180811	0.601936	0.155571
BDNF	0.259521	0.154604	0.0943713	0.595219	0.251262	0.193413	0.124694	0.0744463	0.204335	0.613218	0.691089	0.89876	0.237943	0.287496	0.401754			0.169499	0.346631	0.134492	0.734356	0.309064
BDP1	5.58548	4.90096	5.34581	4.89183	4.7969	4.18397	5.12591	3.04513	5.51953	4.94299	5.00099	4.73641	5.1513	4.92744	4.93147			5.27742	4.62423	4.56352	4.89346	5.0034
BEAN1	0.393253	1.05068	0.270847	0.39625	0.475426	0.849585	0.652186	0.605077	0.511114	0.629157	0.520953	0.37679	0.705287	0.535177	0.373822			0.571593	0.573754	0.589459	0.508967	0.538095
BECN1	28.9476	28.3935	27.7542	30.3279	28.7218	27.5196	28.3753	30.3962	28.2396	27.3028	27.8383	30.3408	30.4069	30.4323	29.8896			28.3651	28.8564	29.0037	28.494	30.2429
BECN2	0	0	0	0	0	0	0	0	0	0	0	0	0	0	0			0	0	0	0	0
BEGAIN	0.36816	0.259867	0.407674	0.733251	0.464261	0.673411	0.576022	0.527361	0.231211	0.219381	0.192046	0.351593	0.346979	0.388707	0.416945			0.345234	0.623641	0.444865	0.25434	0.38421
BEND2	0.000486322	0	0	0	0	0	0	0	0	0.000480168	0	0.00045815	0	0	0.0149007			0.000162107	0	0	0.000312773	0.0049669
BEND3	1.30718	1.32514	1.1217	1.31602	1.20394	1.17023	1.40672	1.02852	1.35007	1.16248	1.15828	1.31301	1.1557	1.30687	1.39741			1.25134	1.23006	1.26177	1.21126	1.28666
BEND4	0.00134356	0.00316355	0.0179182	0.000613232	0.00634173	0.011961	0	0.00362763	0.00967893	0	0	0.00126573	0.00450604	0.0060213	0.00293958			0.0074751	0.00630532	0.00443552	0.00042191	0.00448897
BEND5	0.0723397	0.101571	0.0311769	0.0463675	0.0338344	0.127423	0.096167	0.112685	0.0344703	0	0.0591432	0	0.035173	0.0221513	0			0.0683625	0.0692083	0.0811074	0.0197144	0.0191081
BEND6	5.81731	5.58936	8.67383	4.23528	5.93339	4.85878	4.69385	6.8912	5.44371	6.00762	7.15644	8.61359	7.2132	4.90923	5.89075			6.6935	5.00915	5.67625	7.25922	6.00439
BEND7	0.827724	0.893152	0.680722	3.39641	2.30371	2.62572	0.414666	0.656815	0.45817	0.763582	0.383179	0.5378	0.851217	0.871103	0.969217			0.800533	2.77528	0.509884	0.56152	0.897179
BEST1	1.5207	1.82411	1.1435	2.6514	2.46891	2.08707	2.2784	1.47819	1.98799	0.757588	0.946124	1.34552	0.989372	1.18215	1.3906			1.4961	2.40246	1.91486	1.01641	1.18737
BEST2	0.141077	0.245538	0.0299939	0.147375	0.150627	0.222706	0.18774	0.166343	0.113006	0.00843486	0.0191836	0.0362978	0.304627	0.333491	0.306207			0.13887	0.173569	0.155696	0.0213054	0.314775
BEST3	0.520143	0.73401	0.743915	0.605181	0.369703	0.487217	0.775157	0.802279	0.641816	0.186741	0.153255	0.2537	0.263305	0.394126	0.443713			0.666023	0.487367	0.739751	0.197899	0.367048
BEST4	0.102525	0.10237	0.139136	0.314623	0.176177	0.23306	0.17087	0.114566	0.203662	0.119674	0.132838	0.187366	0.193451	0.0943608	0.222925			0.114677	0.241287	0.163033	0.146626	0.170246
BET1	28.7235	29.0784	22.7945	26.3787	25.8575	26.4191	27.7195	39.2396	30.9938	34.8724	27.992	31.5936	26.7285	27.9468	31.5286			26.8655	26.2184	32.651	31.486	28.7346
BET1L	21.8994	23.5468	22.4295	21.3375	22.273	22.3109	23.9533	24.4854	22.1653	21.4248	22.8284	24.7581	22.7744	25.2109	24.3592			22.6252	21.9738	23.5347	23.0038	24.1148
BEX1	9.229	8.44098	8.46797	7.0751	6.94868	7.08908	11.2034	12.4533	9.70103	8.44512	6.96319	7.88162	7.80648	7.26543	8.03868			8.71265	7.03762	11.1192	7.76331	7.70353
BEX2	1.51027	1.94843	2.80662	2.4122	2.21316	2.47843	2.53966	1.75496	2.75203	0.531855	0.153707	0.599758	0.853461	0.563347	0.541923			2.08844	2.36793	2.34888	0.42844	0.65291
BEX4	8.02019	7.45665	7.74154	9.39548	9.33524	7.7624	7.98958	9.00413	10.2036	5.21118	4.78066	7.20111	5.77277	8.05426	7.59344			7.73946	8.83104	9.06577	5.73098	7.14016
BEX5	0.0458242	0.551305	0	0.164185	0.184608	0	0	0.0508275	0.0903493	0.0452443	0.0155616	0.0431696	0.0631339	0.787034	0.28398			0.199043	0.116264	0.0470589	0.0346585	0.378049
BFAR	25.9074	26.9513	26.5523	23.2773	24.6248	21.5094	25.3615	23.7126	26.1204	29.3171	29.0082	30.1726	26.6445	27.1639	27.0949			26.4703	23.1372	25.0648	29.4993	26.9678
BFSP1	0.459158	0.360219	0.485864	0.568059	0.522908	0.544734	0.423825	0.502627	0.530299	0.383992	0.220234	0.370986	0.470885	0.487158	0.610855			0.43508	0.545234	0.485584	0.325071	0.522966
BFSP2	0	0.000362408	0	0.00102565	0	0.00182345	0	0.00166122	0.00147686	0.00073957	0.00130826	0	0	0.00103217	0.000674307			0.000120803	0.0009497	0.00104603	0.00068261	0.000568826
BGLAP	9.65855e-51	4.99764e-84	1.56151e-121	2.63592e-132	1.57728e-172	4.17727e-49	2.0872e-101	2.08443e-65	1.49997e-70	9.50146e-55	3.60402e-77	1.47148e-36	1.24477e-74	0.326051	3.20209e-112			3.21952e-51	1.39242e-49	6.94815e-66	4.90493e-37	0.108684
BGN	92.0205	95.5391	90.0009	130.97	115.255	120.549	97.9917	101.912	88.1972	80.5565	73.4064	80.056	92.3375	101.297	96.9844			92.5202	122.258	96.0336	78.0063	96.873
BHLHA15	0	0.0746652	0	0.0704368	0.0746649	0.0939191	0.279992	0.124636	0.166148	0	0.179693	0.0529244	0.077401	0.0708856	0			0.0248884	0.0796736	0.190259	0.0775391	0.0494289
BHLHA9	0	0	0	0	0	0	0	0	0	0	0	0	0	0	0			0	0	0	0	0
BHLHB9	1.31811	1.17035	1.48711	2.02932	1.49555	1.34467	1.32997	1.26218	1.13777	1.5088	1.42458	1.19651	1.29202	1.42298	1.41136			1.32519	1.62318	1.24331	1.37663	1.37545
BHLHE22	0.0290204	0.00851906	0	0.0803659	0.0564356	0.0428636	0.0212969	0.0292889	0.0433979	0.0260774	0.020502	0.0497633	0.157685	0.350903	0.174359			0.0125132	0.0598884	0.0313279	0.0321142	0.227649
BHLHE23	0	0	0	0	0	0	0	0	0	0	0	0	0	0	0			0	0	0	0	0
BHLHE40	16.386	18.4962	17.0098	30.7556	22.7447	23.3828	20.0507	17.953	18.3766	14.2034	14.0773	14.2451	13.0824	15.0924	13.0285			17.2973	25.6277	18.7934	14.1753	13.7344
BHLHE41	1.38992	1.55733	1.39213	2.34781	1.64365	1.8815	1.60947	1.53592	1.4756	1.10334	1.31981	1.39914	1.45787	1.43319	1.45974			1.44646	1.95765	1.54033	1.2741	1.45027
BHMG1	2.45932e-195	3.69127e-110	0.00755751	0.103678	2.45705e-191	8.48861e-155	0.0127145	0.0138825	0.00904798	0.0474829	0.0549896	0.00387935	0.0517035	0.170825	0.0862724			0.00251917	0.0345593	0.0118817	0.0354506	0.102934
BHMT	0.0713934	0.0267688	0	0.0774871	0.0410513	0.033687	0.0374186	0.0203104	0.0272841	0	0.00161109	0.0153829	0.00842431	0.0112175	0.0992639			0.0327207	0.0507418	0.0283377	0.00566466	0.0396352
BHMT2	3.67011	3.71041	3.09241	3.02604	2.6962	2.69875	3.19841	3.48994	3.64494	4.06968	4.15561	3.65987	4.11174	3.66093	3.93193			3.49098	2.807	3.44443	3.96172	3.90153
BICC1	8.38187	7.97012	9.13122	8.60913	8.21608	7.96658	7.81331	7.84266	8.65238	9.01623	8.24541	8.96532	9.02651	9.31229	8.74634			8.4944	8.26393	8.10278	8.74232	9.02838
BICD1	4.92804	4.93472	5.20504	5.83248	5.28393	5.38906	4.80223	3.39029	4.77424	5.94499	5.76791	4.887	5.03285	4.96868	5.31441			5.0226	5.50182	4.32225	5.5333	5.10531
BICD2	22.2474	23.3712	21.7273	25.0145	23.72	23.7219	21.166	19.4852	21.6862	22.1522	22.1217	22.1804	22.5233	21.9566	23.0436			22.4486	24.1521	20.7791	22.1514	22.5078
BID	29.3843	39.0665	30.9095	39.3134	38.0691	39.1697	35.2059	39.9046	33.2948	35.3663	33.1191	32.4416	34.7516	35.5372	34.1718			33.1201	38.8507	36.1351	33.6423	34.8202
BIK	0.00449284	0.0436342	0.00546148	0.090841	0.0101439	0.0127601	0.321372	0.082674	0.323335	0.00147866	0.00523134	0.00564344	0.0769431	0.00963052	0.0067409			0.0178628	0.037915	0.24246	0.00411781	0.0311048
BIN1	25.8336	25.8791	24.3797	29.52	25.795	28.5736	28.548	28.0149	25.8166	23.808	26.0404	25.4794	25.6052	26.8304	24.4263			25.3641	27.9629	27.4598	25.1093	25.6206
BIN2	0.000646772	0.0243195	0.00117932	0.0224534	0.029619	0.000787237	0.000782284	0.0552587	0.0247076	0	0.035649	0	0.0197505	0.00118832	0.0225692			0.0087152	0.0176199	0.0269162	0.011883	0.0145027
BIN3	17.8884	17.8202	16.2739	16.2594	15.2807	17.3889	18.3166	17.3048	16.5243	16.6066	17.6288	16.1388	20.063	18.6497	17.7105			17.3275	16.3097	17.3819	16.7914	18.8077
BIRC2	29.0124	31.4683	30.5681	30.5959	29.9411	29.5501	25.6246	28.0878	26.917	25.7987	27.4531	26.5182	26.0978	27.0204	28.1748			30.3496	30.029	26.8765	26.59	27.0977
BIRC3	8.29499	12.4339	10.3727	10.1357	8.21489	9.45271	6.31548	6.14713	5.3667	1.9704	2.48491	2.1203	1.72229	1.85503	1.55297			10.3672	9.26777	5.9431	2.19187	1.7101
BIRC5	35.7615	33.24	39.5059	20.8056	26.1007	20.8474	33.4996	36.0902	34.6367	47.6259	45.3122	38.506	53.3624	43.5812	43.9113			36.1691	22.5846	34.7422	43.8147	46.9516
BIRC6	6.18314	5.66067	6.69246	5.34415	5.59316	5.42759	6.3006	3.95198	6.59896	6.34052	6.21834	6.1699	6.40499	6.87486	6.48716			6.17876	5.45497	5.61718	6.24292	6.589
BIRC7	0	0	0	0	0.0426638	0.0308542	0.0840885	0.151072	0.0626749	0	0	0	0	0	0			0	0.024506	0.0992785	0	0
BIRC8	0	0	0	0	0	0	0	0	0	0	0	0	0	0	0			0	0	0	0	0
BIVM	17.3722	15.7225	17.0757	13.358	13.6738	14.6443	14.9657	16.014	17.4631	19.2655	17.4517	18.7651	20.5409	19.9288	18.9963			16.7235	13.892	16.1476	18.4941	19.822
BIVM-ERCC5	0.582205	1.43443	1.00869	0.935088	0.958756	0.812552	1.25793	0.348484	1.17956e-08	1.03607	0.214489	0.338239	0.317248	1.76569	0.403429			1.00844	0.902132	0.535471	0.529599	0.828789
BLCAP	27.5757	30.1972	27.4488	27.2332	28.0903	25.9435	27.6208	31.4349	26.8413	28.5763	27.9972	31.8968	29.6473	30.9844	30.9423			28.4072	27.089	28.6323	29.4901	30.5247
BLID	0.299746	0.459348	0.0780792	0.156355	0.455783	0	0.276634	0.0474953	0	0.45164	0.0498594	0.0403403	0.029498	0.0786749	0.0770961			0.279058	0.204046	0.108043	0.180613	0.0617563
BLK	0.313416	0.370359	0.161025	0.326257	0.291053	0.199088	0.207882	0.201154	0.318545	0.12904	0.29184	0.154178	0.255509	0.379582	0.274933			0.2816	0.272133	0.242527	0.191686	0.303341
BLM	2.53162	2.32083	2.70248	1.35285	2.41419	1.98973	2.58103	2.9475	2.89624	3.30716	3.39276	3.27661	3.64425	3.45316	3.05529			2.51831	1.91892	2.80826	3.32551	3.38423
BLMH	18.6588	18.0337	19.1025	16.1744	16.7579	17.7634	19.4077	19.3554	19.8431	18.2966	19.436	19.7089	22.9015	21.0655	21.8546			18.5983	16.8986	19.5354	19.1472	21.9405
BLNK	0.00361434	0.00102363	0	0.00450642	0.00102361	0.0008584	0.003412	0.00117304	0.00243335	0.00174078	0.0020529	0.00166096	0.00315781	0.00259147	0.0028569			0.00154599	0.00212948	0.00233946	0.00181821	0.00286873
BLOC1S1	48.6801	46.9653	42.8262	40.8161	44.1052	46.0108	47.7946	59.9502	48.4889	44.9517	44.3348	44.0337	44.3144	47.5295	49.2447			46.1572	43.644	52.0779	44.4401	47.0295
BLOC1S2	34.251	36.4111	32.1682	33.537	36.0184	33.1615	29.4275	34.7814	30.8049	34.0642	32.1845	32.7368	32.8543	31.6773	30.4753			34.2768	34.239	31.6713	32.9952	31.669
BLOC1S3	15.7778	14.4103	13.336	15.1157	13.702	14.8074	15.527	15.5032	15.3433	14.3723	13.7412	14.593	13.4098	13.6033	14.1476			14.508	14.5417	15.4578	14.2355	13.7202
BLOC1S4	5.34591	6.2887	7.26298	6.10478	6.08571	6.86417	6.11101	7.57945	6.37583	4.96777	5.80966	5.98422	6.0222	5.4888	5.83159			6.2992	6.35155	6.68876	5.58722	5.78086
BLOC1S5	6.29992	6.07458	5.38139	4.27039	5.81292	4.13984	5.86007	5.68306	6.47495	7.01054	7.01457	6.1142	5.97055	5.59769	5.57161			5.91863	4.74105	6.00603	6.7131	5.71328
BLOC1S6	11.4085	11.9132	10.722	9.49047	9.77493	9.07133	10.5591	11.0899	11.6295	13.0873	13.3117	13.4628	13.8874	12.9138	12.6288			11.3479	9.44558	11.0928	13.2873	13.1433
BLVRA	28.0815	26.8878	28.4538	22.9338	24.5905	25.8082	24.814	31.9626	26.4147	30.6603	32.3586	26.378	28.3897	26.2683	27.6622			27.8077	24.4442	27.7304	29.799	27.4401
BLVRB	19.7788	21.5565	16.9722	17.7454	18.885	18.043	25.0425	21.6389	19.8472	18.5897	21.9608	21.8539	18.8211	19.1694	18.2124			19.4358	18.2245	22.1762	20.8015	18.7343
BLZF1	25.8445	26.0101	25.9092	24.5931	26.0083	26.1348	23.9075	24.7877	26.7659	26.0815	22.2141	25.0091	20.7142	24.2175	23.0372			25.9213	25.5787	25.1537	24.4349	22.6563
BMF	0.572157	0.188425	0.0857178	0.520858	0.275858	0.553643	0.343953	0.367607	0.309543	0.0795686	0.325344	0.17209	0.273173	0.220649	0.175436			0.2821	0.45012	0.340368	0.192334	0.223086
BMI1	19.0538	17.3246	17.726	22.1844	21.6844	19.2322	20.6482	15.6699	19.851	20.7136	22.5449	19.3291	17.3957	20.444	19.687			18.0348	21.0337	18.723	20.8625	19.1756
BMP1	26.3942	27.6003	25.8554	34.6778	31.7452	32.7691	28.4405	23.0704	24.8093	30.5648	31.0314	31.0974	24.4191	24.4035	23.7259			26.6166	33.064	25.4401	30.8979	24.1828
BMP10	0	0	0	0	0.0508549	0	0	0	0	0	0	0	0	0	0			0	0.0169516	0	0	0
BMP15	0	0	0	0	0	0	0	0	0	0	0	0	0	0	0			0	0	0	0	0
BMP2	4.05215	3.68602	2.88961	9.24855	6.7495	6.12954	5.68772	6.98394	5.48034	2.95945	2.23162	2.48027	3.32706	4.0089	3.91626			3.54259	7.37586	6.05067	2.55711	3.75074
BMP2K	11.5348	11.4581	11.469	9.38438	9.69077	8.93522	11.1156	9.05162	12.2901	12.3993	11.1182	11.4481	12.7165	12.4892	11.248			11.4873	9.33679	10.8191	11.6552	12.1512
BMP3	0.100179	0.118637	0.118268	0.152581	0.184928	0.26741	0.121029	0.0827552	0.111958	0.0745379	0.0581266	0.189955	0.0699611	0.0946271	0.0899122			0.112361	0.20164	0.105247	0.10754	0.0848335
BMP4	0.164982	0.481646	0.401036	1.40597	0.772226	0.717445	0.533343	0.387625	0.246207	0.0363095	0.129642	0.103645	0.29218	0.608742	0.217156			0.349221	0.965214	0.389058	0.0898655	0.372693
BMP5	0.000923115	0.00111656	0.000841601	0.000210666	0	0.000842697	0	0.000255906	0.000227508	0.000683575	0	0.00726328	0.0219572	0.0515915	0.0304752			0.000960425	0.000351121	0.000161138	0.00264895	0.0346746
BMP6	1.5133	1.72071	1.37054	4.09963	2.7765	2.41386	1.61677	1.60368	1.10583	2.37523	1.74524	2.1393	1.6275	1.56736	1.80018			1.53485	3.09666	1.44209	2.08659	1.66501
BMP7	0.103135	0.0429267	0.0401854	0.0479567	0.0284712	0	0.125219	0.11364	0.15514	0.0508923	0	0.0251507	0.00506067	0.0236758	0.00660907			0.0620824	0.025476	0.131333	0.0253477	0.0117818
BMP8A	0.331757	0.192844	0.0941588	0.236665	0.143019	0.107258	0.385798	0.241801	0.313554	0.22536	0.229207	0.195682	0.391657	0.366602	0.177334			0.206253	0.162314	0.313718	0.21675	0.311864
BMP8B	0.0512661	0.096497	0.0890773	0.122244	0.08286	0.0932166	0.479753	0.293476	0.562279	0.133582	0.11949	0.0606001	0.0943811	0.0835943	0.13191			0.0789468	0.0994402	0.445169	0.104557	0.103295
BMPER	12.9788	10.8733	13.732	8.80713	10.4461	10.341	12.6776	12.2122	12.8005	15.6073	14.4362	15.4064	15.6864	14.2691	14.142			12.528	9.86474	12.5634	15.15	14.6992
BMPR1A	4.58673	4.2918	4.42664	3.43909	3.24487	3.45221	3.88821	3.78	4.96354	5.0432	4.56276	4.506	5.0786	4.61499	4.92372			4.43506	3.37872	4.21058	4.70399	4.87244
BMPR1B	0.24261	0.229901	0.0300179	0.178506	0.126205	0.157072	0.104739	0.0726637	0.0444269	0.0311127	0.0250979	0.0414303	0.0463258	0.079112	0.087826			0.16751	0.153928	0.0739432	0.032547	0.0710879
BMPR2	8.93441	9.03301	8.34521	10.4309	9.13684	9.19461	9.51426	5.41198	9.41402	8.71445	8.94884	7.9755	7.52227	8.06968	7.52021			8.77088	9.58745	8.11342	8.54626	7.70405
BMS1	21.7876	22.1372	22.631	20.9586	20.6531	20.9361	21.003	20.6252	22.537	22.8633	23.1893	22.3998	22.7177	24.5233	23.0223			22.1853	20.8493	21.3884	22.8175	23.4211
BMX	0.0149201	0.0168845	0.0198275	0.0161591	0.0170941	0.0156077	0.0198814	0.0221531	0.0144593	0.0147313	0.0214949	0.0231087	0.0205561	0.0167265	0.0168461			0.0172107	0.016287	0.0188313	0.0197783	0.0180429
BNC1	3.74727	3.92614	4.04183	4.02803	3.86537	3.64082	3.23268	3.12657	3.58616	3.92125	3.72997	3.86197	4.31788	3.6428	3.85571			3.90508	3.84474	3.31514	3.83773	3.9388
BNC2	3.6425	3.06103	2.97406	2.78253	3.00341	2.52364	3.62348	2.21069	3.80005	4.70132	4.58919	3.99097	3.8153	3.77702	3.71842			3.22586	2.76986	3.21141	4.42716	3.77025
BNIP1	12.23	11.5828	11.8729	9.90398	12.8062	12.807	11.4633	11.5942	12.4176	12.975	11.01	10.5223	10.1899	13.1845	13.4134			11.8952	11.8391	11.825	11.5024	12.2626
BNIP2	22.0098	22.7757	21.7223	21.6008	20.8137	20.448	19.6046	18.3395	20.0118	22.6447	23.1142	22.2173	23.6166	21.8638	21.7728			22.1693	20.9542	19.3186	22.6587	22.4177
BNIP3	60.5114	65.514	59.328	73.3285	71.0011	68.3584	59.5447	64.4081	61.0584	76.7191	75.453	75.04	54.1932	52.9413	54.6379			61.7845	70.896	61.6704	75.7374	53.9241
BNIP3L	26.7067	28.0458	28.7	32.7363	31.5606	29.132	28.0191	25.4061	27.2423	30.1285	34.7436	30.2522	24.4518	24.4879	20.5091			27.8175	31.143	26.8892	31.7081	23.1496
BNIPL	0.230295	0.114101	0.193511	0.090673	0.0793307	0.0927644	0.181898	0.167346	0.104368	0.101824	0.219663	0.221241	0.397808	0.240634	0.17707			0.179302	0.0875894	0.151204	0.180909	0.271837
BOC	3.52513	3.69923	5.69729	3.43552	4.51935	4.57782	4.35227	4.23145	4.02716	3.85802	3.42488	3.66342	5.24592	5.50387	5.04363			4.30722	4.17756	4.20363	3.64877	5.26447
BOD1	25.1873	28.6341	28.6041	28.5032	28.1228	31.2688	26.3721	29.3944	27.3539	26.9646	28.8334	26.7677	30.7882	28.3837	25.5935			27.4752	29.2983	27.7068	27.5219	28.2551
BOD1L1	5.34866	5.194	5.63584	5.76869	5.4584	5.18063	5.56703	2.88731	5.52854	5.35363	5.22053	5.32645	5.12618	5.36028	4.84481			5.39283	5.46924	4.66096	5.3002	5.11042
BOD1L2	0	0	0	0	0.217073	0.0546109	0	0	0	0	0.104484	0.0084259	0.0123225	0.0164329	0			0	0.0905613	0	0.0376366	0.00958513
BOK	8.90682	8.79396	8.08684	9.75859	9.18436	10.0158	9.36848	9.1413	8.02263	9.43156	8.70827	9.34101	9.37885	9.32537	8.95877			8.59587	9.65292	8.84414	9.16028	9.221
BOLA1	5.86017	4.71437	6.62338	3.91014	5.27419	5.37759	5.5774	7.67289	4.8849	5.72797	6.8055	5.48183	7.2341	6.18477	7.43894			5.73264	4.85397	6.04506	6.0051	6.9526
BOLA2	79.2532	80.9372	78.5018	77.4128	77.6769	83.1348	81.131	98.2085	83.2292	83.1412	82.255	78.0666	84.2843	83.906	85.8523			79.5641	79.4082	87.5229	81.1543	84.6809
BOLA2B	33.5036	38.6264	36.8245	34.8245	34.3277	37.2849	37.9225	47.6678	38.5885	39.8883	41.2577	34.3488	39.9296	35.6763	39.9889			36.3182	35.479	41.3929	38.4983	38.5316
BOLA3	85.4789	82.3549	87.4555	67.54	76.665	73.9093	83.2258	113.523	83.269	89.961	81.5584	86.0607	83.9046	92.5832	96.7065			85.0964	72.7048	93.3393	85.86	91.0648
BOLL	0.0103894	0.0113099	0.0125575	0.0080757	0.0101292	0.0093406	0.00999582	0.00680764	0.0180542	0.00831512	0.020285	0.0123483	0.022745	0.0186237	0.0199702			0.0114189	0.00918183	0.0116192	0.0136495	0.0204463
BOP1	53.7957	53.7425	51.7698	44.6667	49.388	49.1757	55.8164	52.6685	51.7581	51.5599	53.7839	52.5209	61.218	55.9623	57.7129			53.1027	47.7435	53.4143	52.6216	58.2977
BORA	4.81526	4.48357	4.96586	2.96798	3.41457	3.16652	4.56602	4.60505	4.40939	5.00929	4.49171	4.91396	5.67026	5.11933	5.90105			4.7549	3.18302	4.52682	4.80499	5.56355
BPGM	9.06861	9.59254	10.442	8.45696	10.2806	8.44285	8.24843	9.8522	8.62188	9.23792	9.00616	9.09221	9.89338	9.91954	8.87133			9.70105	9.06014	8.9075	9.1121	9.56142
BPHL	9.50707	10.2022	10.9356	8.43978	8.68654	9.67173	9.49852	11.1376	10.0925	10.3706	10.5683	9.78394	10.3586	11.4048	10.5731			10.215	8.93268	10.2429	10.2409	10.7788
BPI	0	0.000820058	0	0	0.000820042	0	0	0	0	0	0	0	0.0295428	0.000778536	0.000762912			0.000273353	0.000273347	0	0	0.0103614
BPIFA1	0	0.00382452	0	0	0	0	0	0	0	0	0	0	0	0	0			0.00127484	0	0	0	0
BPIFA2	0	0	0	0	0	0	0	0	0	0	0	0	0	0	0			0	0	0	0	0
BPIFA3	0	0	0	0	0	0	0	0	0	0	0	0	0	0	0			0	0	0	0	0
BPIFB1	0.00105863	0.00307313	0	0.00289909	0.00204871	0	0	0.00234779	0.00104362	0	0	0	0.00364628	0.00389004	0.00381197			0.00137725	0.00164927	0.00113047	0	0.00378276
BPIFB2	0	0	0	0	0	0	0	0	0	0	0	0	0	0	0			0	0	0	0	0
BPIFB3	0	0	0	0	0	0	0	0	0	0	0	0	0	0	0			0	0	0	0	0
BPIFB4	0	0	0	0	0.0331696	0	0	0	0	0	0	0	0	0.000859308	0			0	0.0110565	0	0	0.000286436
BPIFB6	0	0	0	0	0	0	0	0	0	0	0	0	0	0	0			0	0	0	0	0
BPIFC	0	0.00107836	0	0.0330412	0.036304	0.000678221	0	0	0	0.000550156	0	0	0.000383844	0	0			0.000359453	0.0233411	0	0.000183385	0.000127948
BPNT1	12.6514	14.1683	12.3018	9.79688	11.3119	11.1495	13.304	16.459	13.168	14.1261	12.0749	12.9245	15.2462	15.0341	16.4885			13.0405	10.7528	14.3103	13.0418	15.5896
BPTF	8.3926	7.82401	8.57021	8.06043	7.62649	7.84083	7.86441	5.2788	7.80527	7.76125	8.15651	8.21169	8.38552	8.7243	8.04439			8.26227	7.84258	6.98283	8.04315	8.38474
BPY2	0	0	0	0	0	0	0	0	0	0	0	0	0	0	0			0	0	0	0	0
BPY2B	0	0	0	0	0	0	0	0	0	0	0	0	0	0	0			0	0	0	0	0
BPY2C	0	0	0	0	0	0	0	0	0	0	0	0	0	0	0			0	0	0	0	0
BRAF	4.75483	4.59926	4.37849	5.4533	5.07049	4.53561	3.62804	3.02598	3.60616	3.92642	3.50826	3.41454	3.94937	3.75945	3.81421			4.57753	5.0198	3.42006	3.61641	3.84101
BRAP	10.3205	10.6762	12.6303	11.3628	11.2189	12.3544	11.0366	9.98403	10.9998	10.4397	11.1581	10.9457	10.2719	10.0351	10.7226			11.209	11.6454	10.6735	10.8478	10.3432
BRAT1	11.5408	12.0621	12.1185	10.1833	11.6169	12.7453	13.4031	11.5428	11.5565	11.4165	13.5202	12.3909	14.1273	12.845	13.1348			11.9071	11.5152	12.1675	12.4425	13.369
BRCA1	4.34082	3.88839	4.70092	2.36501	2.9492	3.2394	3.83136	3.77019	3.84166	5.01031	5.081	4.7789	5.75982	5.15667	5.64513			4.31004	2.8512	3.8144	4.95674	5.52054
BRCA2	1.35588	1.11815	1.40941	1.37386	1.42492	1.29097	1.29671	0.916237	1.49848	1.24046	1.15756	1.10332	1.31322	1.3465	1.1558			1.29448	1.36325	1.23714	1.16711	1.27184
BRCC3	10.2158	9.84174	10.9186	7.91575	8.27509	8.50887	9.64297	9.10884	11.1805	11.9348	10.9225	11.7596	11.676	11.9	11.0881			10.3254	8.23324	9.97744	11.539	11.5547
BRD1	9.34088	9.57806	8.5	11.48	9.34888	9.11246	9.3532	6.8938	8.15748	7.2578	6.74031	6.77907	7.4374	7.46099	7.18036			9.13965	9.98045	8.13483	6.92573	7.35958
BRD2	87.4478	91.3838	85.2336	108.078	92.5363	95.4777	87.494	74.0917	87.3215	72.1795	71.268	76.3368	89.3625	93.1142	82.5981			88.0217	98.6973	82.9691	73.2614	88.3583
BRD3	4.00701	4.20741	4.11114	3.78953	3.9201	3.91508	5.01488	4.08033	4.54341	5.09363	4.96047	4.60576	4.73162	4.06503	4.39393			4.10852	3.8749	4.54621	4.88662	4.39686
BRD4	18.0815	17.9388	17.1046	23.7101	21.1671	20.2741	18.7642	12.3975	16.4859	14.391	15.7367	14.156	16.9602	15.7911	15.6693			17.7083	21.7171	15.8825	14.7612	16.1402
BRD7	16.2305	15.4404	16.1664	15.6223	16.3375	15.187	16.0999	16.8196	16.3371	16.5022	15.5468	17.1733	16.6927	17.1998	16.7865			15.9458	15.7156	16.4189	16.4074	16.893
BRD8	12.2571	12.2545	11.514	11.7222	10.8995	11.3034	11.2637	10.1104	10.7177	10.6501	10.1996	10.913	12.1566	12.214	11.6379			12.0085	11.3084	10.6973	10.5876	12.0028
BRD9	19.4495	18.5713	18.6626	16.2574	17.2249	16.8525	19.153	16.979	17.2467	19.2138	19.0559	17.579	19.5632	19.1865	19.5574			18.8945	16.7783	17.7929	18.6162	19.4357
BRDT	0.000433199	0	0	0.000790889	0.000419176	0.0129373	0	0.000480367	0.000427059	0.000427717	0	0	0.000298418	0	0.0213012			0.0001444	0.00471579	0.000302475	0.000142572	0.00719987
BRE	22.303	20.3472	24.0286	18.7476	17.6856	19.1521	21.7845	24.2409	26.0434	21.0642	21.5853	22.3992	23.0232	22.7866	21.6585			22.2263	18.5284	24.0229	21.6829	22.4894
BRF1	10.8528	12.2375	10.1842	9.16185	9.26135	9.29714	10.129	8.84421	10.1657	9.25527	10.1747	10.0752	11.0865	9.83619	10.1719			11.0915	9.24011	9.71297	9.83506	10.3649
BRF2	5.56686	5.20364	5.65618	6.17152	6.00525	5.95271	5.42387	5.42371	5.1284	5.22231	5.30376	5.48336	4.57386	4.68986	5.13606			5.47556	6.04316	5.32533	5.33648	4.79993
BRI3	161.896	170.171	174.234	171.882	169.736	169.962	160.371	213.505	150.583	142.985	146.102	152.099	146.52	148.147	157.581			168.767	170.527	174.82	147.062	150.749
BRI3BP	4.09112	5.37124	3.12415	3.72308	3.76109	3.97025	4.79369	4.33434	3.83366	5.39496	4.79343	5.38043	5.1539	4.67171	4.9276			4.1955	3.81814	4.32056	5.18961	4.91774
BRICD5	1.34898	1.12339	1.04217	0.749757	1.02791	0.894144	1.49248	2.21008	1.07837	0.942069	0.972358	1.16076	1.30661	1.52052	1.07513			1.17151	0.890604	1.59364	1.02506	1.30075
BRINP1	0.10796	0.1951	0.246979	0.172899	0.0913885	0.110362	0.284147	0.187721	0.0742083	0.222694	0.267791	0.168299	0.175207	0.335094	0.126957			0.183346	0.124883	0.182025	0.219595	0.212419
BRINP2	0.0130906	0.0455044	0	0.00802993	0.0165252	0.0567922	0.0848786	0.0378865	0	0.00842532	0.0152423	0	0.0161129	0.043	0.0707573			0.0195317	0.0271158	0.0409217	0.00788921	0.0432901
BRINP3	0.000285464	0.000283373	0.000175	0.000242614	0.000397666	0.000276428	0.000226214	0.000360207	0.000371181	0.000417918	0.000343848	0.000134464	0.000171219	0.000295023	0.000231503			0.000247946	0.000305569	0.000319201	0.000298743	0.000232582
BRIP1	1.38881	1.29105	1.54374	0.942846	1.20652	1.06058	1.43302	1.23548	1.63755	1.9658	1.61038	1.66852	2.17983	1.76808	1.89811			1.40787	1.06998	1.43535	1.74823	1.94867
BRIX1	43.8124	42.4069	45.352	38.5943	38.4255	36.1314	38.9755	47.815	44.6348	51.4804	49.5854	51.9345	46.2319	47.7927	48.3948			43.8571	37.7171	43.8084	51.0001	47.4731
BRK1	171	175.457	131.896	187.785	149.501	143.698	138.297	187.93	177.631	156.663	180.342	144.639	141.759	144.238	144.699			159.451	160.328	167.953	160.548	143.565
BRMS1	32.3336	31.4576	32.0454	25.7963	28.4496	29.7384	34.8104	35.9114	33.0524	29.8114	31.4445	30.629	36.9692	33.6528	36.4922			31.9455	27.9948	34.5914	30.6283	35.7047
BRMS1L	5.64101	6.45713	6.49504	5.04969	5.95808	6.14466	5.57056	6.01819	5.77619	7.03209	6.49843	5.43297	7.09822	5.49102	5.82402			6.19773	5.71748	5.78831	6.32116	6.13775
BROX	13.1373	11.8173	12.998	13.3232	12.1139	12.2826	10.8757	11.4395	11.8037	13.3969	11.1253	11.1476	11.9315	11.9568	12.5439			12.6509	12.5732	11.373	11.8899	12.1441
BRPF1	6.56591	7.11273	6.54125	7.85438	7.89806	7.49805	6.99141	5.24356	6.42372	5.26273	5.5991	5.24773	5.91412	6.04938	6.39012			6.73996	7.75016	6.21956	5.36985	6.11787
BRPF3	8.65602	9.26372	8.17208	11.1916	9.53749	9.53301	8.70612	7.17068	8.19762	8.66103	8.12661	8.17746	8.23402	8.21188	7.92334			8.69727	10.0874	8.02481	8.3217	8.12308
BRS3	0	0	0	0	0	0	0	0	0	0	0	0	0	0	0			0	0	0	0	0
BRSK1	1.3671	1.42248	1.17614	1.84361	1.59401	1.9642	2.22585	2.2768	1.96733	1.10693	1.2752	1.4669	1.86325	2.11369	2.30656			1.32191	1.80061	2.15666	1.28301	2.0945
BRSK2	0.0175166	0.0232424	0.0340643	0.109872	0.0665608	0.0295397	0.283279	0.174454	0.16015	0.0160189	0.111508	0.0232309	0.0507391	0.0336825	0.0309311			0.0249411	0.0686575	0.205961	0.0502526	0.0384509
BRWD1	5.82243	5.18818	4.24209	5.85665	4.82709	4.61392	4.39439	4.38068	4.60988	4.27152	4.04447	4.02838	3.9214	4.08513	4.31624			5.08423	5.09922	4.46165	4.11479	4.10759
BRWD3	1.40776	1.37531	1.49099	1.82306	1.36944	1.51639	1.40768	0.860415	1.51231	1.61391	1.52945	1.28299	1.34077	1.4286	1.35987			1.42469	1.56963	1.26014	1.47545	1.37641
BSCL2	16.3857	15.3821	16.0317	17.1906	18.5581	17.342	18.9409	17.51	17.461	13.4009	14.7149	14.8079	16.2514	16.5374	17.514			15.9332	17.6969	17.9706	14.3079	16.7676
BSDC1	17.3507	16.9084	16.3534	19.0557	17.2654	17.5364	17.7078	16.2009	17.4271	17.618	17.4584	18.9966	16.2174	15.7691	16.4338			16.8708	17.9525	17.1119	18.0243	16.1401
BSG	314.473	327.273	302.61	331.86	329.18	343.222	339	357.461	312.57	339.907	348.713	344.376	334.701	321.518	329.342			314.785	334.754	336.344	344.332	328.52
BSN	0.0357686	0.0345641	0.0325256	0.0489641	0.0399448	0.0297583	0.068046	0.0395511	0.0369733	0.0194998	0.0481087	0.0305886	0.071998	0.0558444	0.0745575			0.0342861	0.0395557	0.0481901	0.0327324	0.0674666
BSND	0	0	0	0	0	0	0	0	0	0	0	0	0	0	0			0	0	0	0	0
BSPH1	0	0.00113654	0.00214164	0	0	0	0	0	0	0	0	0	0	0.00107899	0			0.00109273	0	0	0	0.000359663
BSPRY	0	0	0	0	0	0	0	0	0	0	0	0	0.000900306	0	0			0	0	0	0	0.000300102
BST1	1.60824	1.65228	1.16249	1.81244	1.75658	1.36149	0.941961	2.09382	1.65774	2.52628	1.95955	2.2719	1.78007	1.30424	2.09877			1.47434	1.6435	1.56451	2.25258	1.72769
BST2	106.286	137.483	102.834	128.091	118.798	121.529	111.521	105.091	99.6347	53.6118	82.5363	58.602	28.9393	48.7868	52.9482			115.534	122.806	105.416	64.9167	43.5581
BSX	0	0	0	0	0	0	0	0	0	0	0	0	0	0	0			0	0	0	0	0
BTAF1	8.93357	9.27033	8.2501	10.2082	8.88107	8.15133	8.31702	6.15294	8.57978	9.36172	8.62665	8.6048	10.1208	9.58411	8.87731			8.818	9.0802	7.68325	8.86439	9.52741
BTBD1	37.5593	37.1854	37.8196	37.7716	37.1787	33.0845	36.1036	37.8453	37.0819	38.352	36.2117	36.9358	37.4997	37.3853	36.8218			37.5214	36.0116	37.0103	37.1665	37.2356
BTBD10	11.3789	12.0978	12.1836	11.6286	11.4061	10.8445	11.7293	11.526	11.6148	10.5638	10.1785	10.5541	12.1069	13.1234	12.9374			11.8868	11.2931	11.6234	10.4321	12.7226
BTBD11	0.0847468	0.0441003	0.129497	0.0347048	0.0634845	0.0741248	0.0366865	0.0363682	0.049315	0.115615	0.0580912	0.0472002	0.0741174	0.0755953	0.0547824			0.0861147	0.057438	0.0407899	0.0736355	0.068165
BTBD16	0.000837023	0.0565521	0.00228933	0.0437714	0.000809928	0.0701158	0.0696758	0.0023204	0.00165032	0	0.00146191	0.00157707	0.013156	0.0011534	0.00113025			0.0198928	0.0382324	0.0245488	0.00101299	0.00514655
BTBD17	0	0.0220562	0	0	0	0	0.00966569	0.0297093	0	0	0	0	0	0	0			0.00735207	0	0.013125	0	0
BTBD18	0.0265403	0.00947767	0.106601	0.0132664	0.0285373	0.0245274	0.0348321	0.0130662	0.0576479	0.0286801	0.00342995	0.0377805	0.0400459	0.00270612	0.0130828			0.0475397	0.0221104	0.0351821	0.0232968	0.0186116
BTBD19	2.68462	2.79786	1.72955	2.74462	2.02344	2.41447	3.57999	1.26631	3.19158	2.33701	2.10556	1.8348	2.43114	1.65895	2.56719			2.40401	2.39418	2.67929	2.09246	2.21909
BTBD2	47.0917	49.2001	50.4567	47.3736	53.1083	52.426	51.9469	45.3039	47.0835	48.8246	49.7308	46.7225	50.6931	46.3286	46.6219			48.9162	50.9693	48.1114	48.426	47.8812
BTBD3	4.77102	4.75841	4.62996	5.20635	4.75341	4.21976	5.29076	4.17131	4.42442	5.7088	5.94553	5.7721	6.01986	5.59668	5.65553			4.7198	4.72651	4.62883	5.80881	5.75736
BTBD6	21.6725	20.5123	19.7486	21.6294	22.9943	23.5257	21.597	22.8875	19.3145	21.7487	21.9667	22.5546	22.9425	21.7759	21.6474			20.6445	22.7165	21.2663	22.09	22.1219
BTBD7	5.90084	5.44959	5.33476	4.74873	5.48312	5.15167	5.93886	4.37039	5.83947	6.30157	5.86143	5.57469	6.25375	6.61974	6.07952			5.56173	5.12784	5.38291	5.91256	6.31767
BTBD8	0.160268	0.291752	0.169201	0.276116	0.29237	0.257084	0.220511	0.101682	0.566804	0.566826	0.323883	0.427628	0.188548	0.251375	0.515781			0.207074	0.27519	0.296332	0.439446	0.318568
BTBD9	2.74484	2.83591	2.69543	2.70106	2.63784	2.30098	2.96407	1.59961	3.11727	2.70748	2.68576	2.94629	2.88746	3.3125	3.17908			2.75873	2.54663	2.56032	2.77984	3.12635
BTC	0.0461049	0.171055	0.0419014	0.213698	0.12685	0.15384	0.0138973	0.316949	0.0246547	0.0226891	0.0401358	0	0.100912	0.052783	0.148195			0.0863538	0.164796	0.1185	0.0209416	0.10063
BTD	3.9998	4.67458	4.56288	4.31953	4.5035	4.60146	4.56026	4.57212	4.85863	4.96107	5.46164	4.56925	5.17754	5.35498	4.2			4.41242	4.47483	4.66367	4.99732	4.91084
BTF3	380.7	402.013	401.399	359.987	375.883	375.709	385.123	483.738	387.899	409.392	385.435	435.049	437.721	442.163	435.517			394.704	370.526	418.92	409.959	438.467
BTF3L4	11.8581	9.76293	15.4164	6.6406	7.36091	13.442	13.7361	9.96491	11.3927	10.7147	11.5691	9.0234	11.3085	10.6817	15.6655			12.3458	9.14784	11.6979	10.4357	12.5519
BTG1	39.8269	44.3133	39.5074	50.1774	45.2918	41.7958	42.1546	42.6502	37.3367	36.0844	36.3014	34.6587	38.2679	37.4955	33.8665			41.2159	45.755	40.7138	35.6815	36.5433
BTG2	5.00122	6.00993	5.05342	6.53495	6.01138	5.77343	6.49877	7.0115	5.89422	2.18048	1.89363	2.13493	1.93217	1.90625	2.3827			5.35486	6.10659	6.46816	2.06968	2.07371
BTG3	50.9414	56.0972	55.8612	61.375	59.9936	62.9211	51.056	63.2206	54.807	52.4418	45.2184	50.1494	51.8598	51.8197	54.8424			54.2999	61.4299	56.3612	49.2699	52.8406
BTG4	0.127016	0.123848	0.259598	0.391596	0.203123	0.306517	0.282536	0.0729255	0.1343	0.239436	0.0953516	0.224664	0.0412675	0.100065	0.171408			0.170154	0.300412	0.163254	0.186484	0.104247
BTK	0.0482981	0.0472469	0.0411091	0.475361	0.251778	0.223671	0.115981	0.0190729	0.0235721	0.0338411	0.0376699	0.0638142	0.0473568	0.0727777	0.0712415			0.0455514	0.316937	0.0528753	0.0451084	0.063792
BTLA	0.239533	0.371204	0.0881936	0.294163	0.199669	0.13222	0.0652928	0.0965278	0.158146	0.00156136	0	0	0.0885853	0.122933	0.146553			0.232977	0.208684	0.106656	0.000520453	0.119357
BTN1A1	0.10247	0.0627575	0.11651	0.182396	0.184922	0.116135	0.0513664	0.0354011	0.015296	0.0296569	0.0123416	0.0200853	0.0951379	0.166759	0.155011			0.0939125	0.161151	0.0340212	0.0206946	0.138969
BTN2A1	11.4988	12.8533	10.9756	16.6113	14.1186	15.7472	11.7897	10.9609	10.2801	9.46775	9.38856	10.1725	9.27072	10.7944	9.9782			11.7759	15.4924	11.0102	9.67627	10.0144
BTN2A2	2.34556	2.88926	1.94265	2.14829	2.08272	2.41016	2.08682	1.60822	2.09659	1.70605	1.69668	1.44509	1.87371	1.68597	1.81295			2.39249	2.21372	1.93054	1.61594	1.79088
BTN3A1	5.85078	6.64224	6.20095	7.41613	7.06175	6.46894	7.0177	6.2715	6.20771	3.90075	4.30433	3.73082	4.11361	4.46045	4.18189			6.23132	6.98227	6.49897	3.97863	4.25198
BTN3A2	10.7847	11.6093	11.0497	10.0455	10.1552	10.7065	11.5043	12.0796	11.1729	8.56207	8.59214	8.17535	8.46059	9.45914	8.56635			11.1479	10.3024	11.5856	8.44319	8.82869
BTN3A3	5.8904	7.08325	5.98701	5.31284	6.30309	5.78589	6.88313	6.91326	6.70105	3.74374	4.71152	3.80339	3.94384	4.43649	4.09388			6.32022	5.80061	6.83248	4.08622	4.15807
BTNL10	0.00485626	0.0140975	0	0.00443302	0.0434665	0.0177365	0.0462158	0.0281343	0.0221829	0.0223313	0.011309	0.0137248	0.010036	0.00892244	0.022805			0.00631792	0.0218787	0.0321777	0.0157884	0.0139211
BTNL2	0.0411132	0.000944422	2.57878e-07	2.12159e-05	0.0137587	6.66642e-11	0	1.52917e-10	0	0	3.95245e-09	4.9182e-22	0.0246206	2.08273e-29	1.08098e-29			0.0140193	0.00459331	5.09723e-11	1.31748e-09	0.00820687
BTNL3	0	0	0	0	0	0	0	0.000146862	0	0	0	0	0	0	0.00705394			0	0	4.8954e-05	0	0.00235131
BTNL8	0.000265618	0.000128512	0	0.000484936	0.000514038	0.00107768	0	0.000392719	0	0.00104902	0.000721648	0.000125115	0.000256167	0.00024401	0.022628			0.000131377	0.000692218	0.000130906	0.000631928	0.00770939
BTNL9	0.0093168	0.0180317	0	0	0.000644393	0	0.00966576	0.0206706	0.0184506	0.0184443	0.00155083	0	0.0128368	0	0.0167752			0.00911617	0.000214798	0.0162623	0.00666504	0.00987067
BTRC	4.90421	5.06206	5.63219	5.191	4.98328	4.83856	5.4747	5.06245	5.92019	6.57449	6.14019	6.28704	6.35342	6.91876	6.06776			5.19949	5.00428	5.48578	6.33391	6.44665
BUB1	12.7969	11.8216	13.6582	6.22336	8.64265	8.17857	11.4851	11.7613	12.767	15.7763	15.1702	13.5485	16.626	16.9505	16.5042			12.7589	7.68153	12.0045	14.8317	16.6936
BUB1B	11.1661	10.2184	12.1222	5.76652	8.12651	6.7048	10.8877	10.129	11.4515	12.9204	12.9627	12.1485	16.5666	14.9112	14.4218			11.1689	6.86594	10.8227	12.6772	15.2999
BUB3	91.5628	87.8987	92.2888	65.2362	76.838	78.2904	90.408	95.6058	94.6908	95.7037	90.1385	96.2336	110.561	111.666	112.898			90.5834	73.4549	93.5682	94.0253	111.708
BUD13	5.93264	5.7464	6.62097	5.59767	5.8894	6.13768	5.68487	5.61033	5.46488	5.52995	5.85619	5.83487	6.26049	6.2305	6.2922			6.1	5.87492	5.58669	5.74034	6.26106
BUD31	81.2793	93.2055	85.6843	93.626	93.0706	91.79	77.5584	112.692	81.6316	74.8045	80.5744	87.9106	81.8706	91.5321	94.9012			86.723	92.8289	90.6273	81.0965	89.4346
BVES	2.50021	2.8122	2.85818	3.72212	3.23482	2.92262	2.44983	2.53736	2.62106	2.53017	2.50908	2.91035	2.42059	2.26659	2.27806			2.72353	3.29319	2.53608	2.64987	2.32175
BYSL	28.121	29.3034	27.1121	23.8017	25.4707	28.0105	27.049	29.6521	26.2626	26.1587	27.9593	27.1629	27.886	27.2929	30.2431			28.1788	25.761	27.6546	27.0936	28.474
BZRAP1	0	0.008296	0	0.00187445	0	0.00603072	0.0261702	0.0239912	0.0251011	0	0.0176864	0.0065657	0.0192046	0.00914109	0.00388745			0.00276533	0.00263506	0.0250875	0.00808403	0.0107444
BZW1	142.826	139.882	143.246	136.712	136.949	128.674	116.479	143.816	138.549	134.171	131.346	136.822	143.713	141.026	139.994			141.985	134.112	132.948	134.113	141.578
BZW2	58.0787	55.9199	59.1935	43.1918	51.6095	49.2456	54.8092	67.8308	58.5324	64.2385	63.0992	65.22	63.7134	68.369	65.7388			57.7307	48.0156	60.3908	64.1859	65.9404
C10orf10	2.00327	2.04976	1.35596	2.72861	1.9159	2.90005	3.50238	3.79448	3.0927	1.53073	2.00199	2.24547	2.69967	2.37874	2.17644			1.803	2.51485	3.46319	1.92606	2.41828
C10orf105	0	5.87097e-25	0.021402	0.0966364	0.0315034	0.0132236	1.62141e-154	0	0	0.0091874	0.00371559	0.00293545	0.0227357	0.00022154	0			0.007134	0.0471211	5.4047e-155	0.00527948	0.00765241
C10orf107	1.28403	2.01429	1.71195	0.786702	1.01797	1.29511	0.888065	0.722501	1.11571	1.38399	0.9539	0.939056	1.08572	0.893967	1.09498			1.67009	1.03326	0.908759	1.09232	1.02489
C10orf11	0.773143	0.472963	0.519435	0.413793	1.1609	0.767928	0.34773	0.837201	0.375215	0.498802	0.154364	0.137501	0.499985	0.51327	0.445183			0.588514	0.780874	0.520049	0.263556	0.486146
C10orf111	0.192477	0.136777	0.0339678	0.207834	0.0901293	0.139746	0.0452481	0.0413191	0.160178	0.0735727	0.14246	0.070199	0.243826	0.411006	0.219429			0.121074	0.145903	0.0822484	0.0954106	0.29142
C10orf113	0	0	0	0	0	0	0	0	0	0	0	0	0	0	0			0	0	0	0	0
C10orf12	0.969611	1.28411	0.980122	1.09515	1.06946	0.992989	1.0858	0.631832	1.04682	1.13842	1.20363	1.19551	1.17303	1.13116	1.12289			1.07795	1.05253	0.921484	1.17919	1.14236
C10orf120	0.00736182	0.0189964	0.0313215	0.0358411	0	0.0358426	0.00890427	0.0163282	0.0120958	0	0.0171438	0	0.0253567	0.0135259	0.00441816			0.0192266	0.0238946	0.0124428	0.0057146	0.0144336
C10orf126	0	0.000770439	0	0.00218042	0	0	0	0	0	0.0325732	0	0.000187519	0	0	0			0.000256813	0.000726807	0	0.0109202	0
C10orf128	0.00166947	0.000807729	0	0.0391483	0	0	0.00100963	0.0238449	0	0	0	0	0	0	0			0.000825733	0.0130494	0.00828484	0	0
C10orf131	0.176528	0.0863003	0.0544863	0.238152	0	0.0386147	0.00222908	0.096902	0.00272523	0.085213	0.102678	0.16575	0.0625952	0.152742	0.078176			0.105772	0.0922556	0.0339521	0.11788	0.0978377
C10orf2	14.3877	17.2322	12.5099	13.4981	13.9144	16.5315	14.6263	13.4102	12.5615	13.1177	12.9392	14.0978	13.0026	14.1775	16.5673			14.7099	14.648	13.5327	13.3849	14.5825
C10orf25	0.380643	0.567261	0.54871	0.79523	0.441477	0.852347	0.528458	0.492847	0.708147	0.473613	0.431823	0.517769	0.537899	0.680676	1.29238			0.498871	0.696351	0.576484	0.474402	0.836985
C10orf32	6.61046	6.88113	6.47326	8.50884	7.99437	7.02642	9.07208	7.52478	6.14749	8.28279	12.0491	7.84143	8.03754	7.66212	6.28564			6.65495	7.84321	7.58145	9.39111	7.32843
C10orf35	0.0982026	0.168621	0	0.27777	0.337238	0.380271	0.468828	0.793214	0.416882	0.666147	0.274665	0.262668	0.433445	0.135099	0.330344			0.0889412	0.33176	0.559641	0.40116	0.299629
C10orf53	0	0	0	0	0.000935231	0	0	0	0	0	0	0	0	0	0			0	0.000311744	0	0	0
C10orf54	3.57675	5.06841	4.4569	4.86346	4.01938	4.97117	5.21836	5.34685	4.72271	8.44939	8.96563	9.55516	3.34421	3.60422	4.15635			4.36735	4.618	5.09597	8.99006	3.70159
C10orf55	0.0229547	0.199429	0.160876	4.8574e-88	0.0722389	0.0116513	2.05974e-59	0.00391077	0.0191692	0.0314463	0.370059	0.00751439	0.0960079	0.246492	0.033655			0.127753	0.0279634	0.00769332	0.13634	0.125385
C10orf62	0	0	0	0	0.0572568	0	0.0315913	0	0	0.0267724	0	0	0	0.0522686	0			0	0.0190856	0.0105304	0.00892413	0.0174229
C10orf67	0.0959214	0.127253	0.000720683	0.0716492	0.217085	0.0973147	0.147691	0.000219139	0.111963	0.227891	0.611577	0.336423	0.210637	0.326448	0.117581			0.0746317	0.128683	0.0866244	0.391964	0.218222
C10orf71	0	0	0	0	0	0	0	0	0	0	0	0	0	0	0			0	0	0	0	0
C10orf76	8.3004	8.05018	7.95993	8.93056	8.37492	8.63378	8.63567	8.05746	8.3459	9.72834	9.52621	9.77753	8.0304	8.51237	9.11014			8.1035	8.64642	8.34634	9.67736	8.55097
C10orf82	0.0897969	0.188283	0.10322	0.00979695	0.103236	0.117627	0.0323304	0.118959	0.117989	0.0282573	0.0624824	0.0202212	0.165014	0.0431878	0.0474949			0.1271	0.0768867	0.0897595	0.036987	0.0852322
C10orf88	6.0258	5.95994	5.48165	6.26234	5.67588	5.60213	5.01397	5.61426	5.25221	5.84053	5.11998	4.98609	6.0352	6.13089	5.80379			5.82246	5.84678	5.29348	5.31553	5.98996
C10orf90	0.86149	0.597583	0.670108	0.694782	1.01449	0.856809	0.521501	0.732622	0.552458	0.723306	0.71894	0.879186	0.751797	0.633459	0.879288			0.709727	0.85536	0.602194	0.773811	0.754848
C10orf91	0	0	0	0	0	0	0.0350783	0.0214409	0.0520517	0.11952	0	0	0.0066595	0.048505	0			0	0	0.0361903	0.03984	0.0183882
C10orf95	0.0222415	0.0543314	0.0811112	0	0.0430437	0.0812176	0	0.0246662	0.0553522	0.175686	0.0871718	0.0176316	0.0902502	0.0817319	0.0600679			0.0525614	0.0414204	0.0266728	0.0934965	0.07735
C10orf99	0.135999	0.0874004	0.247066	0.0848175	0.131249	0.141372	0.0546234	0	0	0.00244929	0	0	0.0631634	0.332533	0.438714			0.156822	0.119146	0.0182078	0.00081643	0.278137
C11orf1	8.27479	9.12263	8.3243	9.04719	9.76059	9.04298	9.7836	12.816	8.78402	7.17684	9.50352	9.61748	8.03287	9.59292	9.21954			8.57391	9.28359	10.4612	8.76595	8.94844
C11orf16	0.016259	0.0106817	0.00805121	0.0156851	0.0170903	0.0080617	0.0392542	0.00979268	0.00652939	0.0196184	0.0190258	0.0808519	0.0480335	0.00811265	0.00794984			0.011664	0.0136124	0.0185254	0.039832	0.0213653
C11orf21	0	0	0	0	0	0	0.0172358	0.0158027	0.00509948	0	0	0	0	0	0			0	0	0.0127127	0	0
C11orf24	48.098	49.4354	53.6403	46.7384	47.7637	50.4182	55.2828	61.484	48.0091	54.4249	50.9273	53.474	58.7765	58.026	59.77			50.3912	48.3068	54.9253	52.9421	58.8575
C11orf30	3.06323	2.86869	3.05594	3.24374	3.44694	2.81075	3.24221	2.04014	3.14774	3.07652	3.23723	3.21195	3.13187	3.09947	3.19884			2.99595	3.16714	2.81003	3.17523	3.14339
C11orf31	53.9182	52.5584	46.774	52.8725	56.8345	57.3518	55.7507	66.7929	55.1157	44.3607	50.0252	51.3601	57.2241	52.1704	54.5211			51.0835	55.6863	59.2198	48.582	54.6385
C11orf40	0	0	0	0	0	0	0	0	0	0	0	0	0	0	0			0	0	0	0	0
C11orf42	0.0717546	0.0897206	0.0338108	0.13545	0.0628281	0.020913	0.0672968	0.0411488	0.0638571	0.0385776	0.0323879	0.0436746	0.0661273	0.0423424	0.0417364			0.0650953	0.0730637	0.0574342	0.0382134	0.0500687
C11orf44	0	0.0162732	0.0153322	0	0.00813643	0.0204696	0	0	0.0414472	0.0166044	0.00979633	0.000598909	0.00579245	0.0077246	0.00756959			0.0105351	0.00953534	0.0138157	0.00899988	0.00702888
C11orf45	0.222641	0.251506	0.138811	0.119894	0.13421	0.1443	0.214919	0.545352	0.243247	0.14102	0.257568	0.192988	0.442447	0.354431	0.419014			0.204319	0.132801	0.334506	0.197192	0.405297
C11orf49	20.1282	20.5639	18.0288	18.7931	20.874	21.6476	20.9933	19.2651	22.0214	23.2457	22.2477	20.7283	22.339	23.4881	20.4594			19.5736	20.4382	20.7599	22.0739	22.0955
C11orf52	0.473756	0.271226	0	0.760651	0.204229	0.146434	0.202435	0.167647	0.318582	0.866902	0.350623	0.374031	0.228891	0.179682	0.386408			0.248327	0.370438	0.229555	0.530519	0.264994
C11orf53	0	0	0	0.0278707	0.00268508	0	0	0.000769262	0	0	0	0	0	0	0			0	0.0101853	0.000256421	0	0
C11orf54	5.1789	5.0262	6.4045	4.82125	5.04614	3.12487	4.67982	6.00465	5.75639	6.48576	6.01407	5.27756	6.30628	6.29356	5.83668			5.53653	4.33075	5.48029	5.9258	6.14551
C11orf57	12.2228	11.6477	11.6226	10.9314	11.3885	9.7748	10.4353	8.99282	11.2823	12.5006	11.2341	10.1864	9.67219	10.6977	9.28756			11.831	10.6982	10.2368	11.307	9.88582
C11orf58	101.479	97.9996	94.7848	105.031	92.2254	98.9418	94.4349	105.016	95.1856	96.4531	98.9835	97.3665	91.3702	95.1557	94.337			98.0878	98.7327	98.2122	97.601	93.621
C11orf63	1.45191	1.01387	1.48157	1.50517	1.9747	1.72747	0.720605	0.799577	0.774867	0.621537	0.930648	1.12093	0.728474	0.848517	1.16591			1.31578	1.73578	0.765016	0.891038	0.9143
C11orf65	1.1255	0.831007	0.91623	0.344563	0.280315	0.798967	0.578457	1.01962	0.935514	0.65101	0.480054	0.605519	0.637572	0.403224	0.821164			0.957579	0.474615	0.84453	0.578861	0.620653
C11orf68	47.8939	50.2676	45.3987	37.0307	40.7395	44.4804	46.6764	51.1353	45.183	35.6365	39.6374	38.226	43.2089	41.302	45.1522			47.8534	40.7502	47.6649	37.8333	43.221
C11orf70	6.12366	6.04423	5.6251	4.1196	3.59533	5.2414	4.74048	6.80339	5.03073	6.41496	6.33991	6.22928	6.36058	5.22567	6.46834			5.931	4.31878	5.52487	6.32805	6.0182
C11orf71	1.32226	1.18966	0.886555	0.751712	2.35131	0.545274	0.243683	0.770144	0.893224	0.89068	0.481931	0.792665	1.03064	1.21276	1.22866			1.13282	1.2161	0.635684	0.721759	1.15735
C11orf73	28.1465	32.5779	28.2939	28.0315	27.572	27.8397	29.1162	40.962	28.3604	33.599	35.1668	32.1738	30.8298	37.449	33.2483			29.6728	27.8144	32.8129	33.6465	33.8424
C11orf74	9.95543	10.0825	8.90367	6.66115	7.40574	8.06419	9.81278	12.6368	12.9797	13.0883	12.2031	13.9598	9.90774	12.3323	11.5836			9.6472	7.37703	11.8098	13.0837	11.2745
C11orf80	1.90802	1.74546	1.75806	1.53109	1.23029	1.49655	1.59404	1.5658	1.30173	1.53119	1.35827	1.26055	2.21865	1.72694	1.88339			1.80385	1.41931	1.48719	1.38334	1.94299
C11orf84	11.8515	10.6238	10.7783	13.9495	13.3004	13.896	11.8767	11.8377	12.7109	11.1262	11.3917	10.4317	11.0889	11.1626	11.4966			11.0845	13.7153	12.1418	10.9832	11.2494
C11orf85	0.143165	0.293824	0.0642869	0.260278	0.0625034	0.179402	0.002018	0.0659275	0.033953	0.000823657	0.0749657	0.119221	0.0457617	0.0632108	0.0617134			0.167092	0.167394	0.0339662	0.0650035	0.0568953
C11orf86	0	0	0	0.179414	0	0	0	0.433263	0	0.194057	0.228851	0.0540634	0	0	0			0	0.0598047	0.144421	0.15899	0
C11orf87	0.0725595	0	0	0.00907482	0.0048081	0	0	0.00551022	0	0.00967802	0.0842906	0.0693588	0.00342297	0	0			0.0241865	0.00462764	0.00183674	0.0544425	0.00114099
C11orf88	0.109702	0.00740027	0	0.00581764	0.00493341	0.00620573	0	0.00424022	0.00125655	0.00503394	0.00296825	0.0519226	0.126448	0.0848705	0.00344229			0.0390341	0.00565226	0.00183226	0.0199749	0.0715869
C11orf91	3.4741	3.45919	3.30047	4.09924	4.06019	3.91809	4.17272	4.88991	3.78135	2.0023	3.11169	2.43839	4.40902	4.66307	4.27029			3.41125	4.02584	4.28133	2.51746	4.44746
C11orf94	0.103461	0.200228	0.188651	0.188889	0.150168	0.125931	0.250277	0.286904	0.40798	0.25538	0.120467	0.584808	0.391993	0.19009	0.41912			0.164113	0.154996	0.315054	0.320218	0.333734
C11orf95	4.05087	4.19821	3.77372	4.69891	4.38481	4.29991	4.10316	4.31734	4.32461	3.46838	3.60836	3.76645	4.07289	3.66298	3.90498			4.0076	4.46121	4.24837	3.6144	3.88028
C11orf96	0.547577	0.554657	0.959917	4.24169	2.49073	2.9651	1.71077	1.13692	1.41897	0.310282	0.177987	0.466932	1.45887	0.779012	0.674365			0.687384	3.23251	1.42222	0.3184	0.970749
C11orf97	0.321977	0	0	0.193268	0.143526	0	0	0.0782906	0	0	0	0.00136502	0.000998142	0	0			0.107326	0.112265	0.0260969	0.000455007	0.000332714
C11orf98	78.2805	75.8357	91.6643	58.4008	68.2487	78.6147	79.9507	93.755	90.8143	93.8328	91.1647	83.3034	94.7748	92.1575	94.2103			81.9268	68.4214	88.1733	89.4336	93.7142
C12orf10	21.7715	20.6418	18.2833	17.3692	21.3395	20.1819	22.7688	27.224	21.1416	22.0045	22.9529	23.9181	22.7873	21.5321	23.6123			20.2322	19.6302	23.7115	22.9585	22.6439
C12orf29	23.1097	22.3046	22.0717	19.7879	19.6412	18.0941	22.7032	24.5039	24.7356	18.8923	19.1932	21.7295	23.6807	23.4078	24.5022			22.4953	19.1744	23.9809	19.9383	23.8636
C12orf4	7.94865	8.59656	9.00581	8.34486	7.7649	8.58102	8.00617	8.13956	9.14773	8.00057	8.07383	8.35046	7.98593	9.59451	8.80154			8.51701	8.23026	8.43115	8.14162	8.79399
C12orf40	0.0010292	0.00170726	0.000178727	0.00165531	0.00033196	0.000357919	0.001067	0.00069873	0.00154607	0.00107424	0.000684782	0.000831066	0.00140109	0.00163904	0.000847087			0.000971729	0.00078173	0.00110393	0.000863363	0.00129574
C12orf42	0.000222865	8.85e-05	0.000153347	0.000293236	5.79816e-05	8.44509e-05	0.000171654	1.16571e-05	6.7955e-05	0.000124554	7.34428e-05	0.000185691	0.000246634	0.000668288	1.13563e-05			0.000154904	0.000145223	8.37554e-05	0.000127896	0.000308759
C12orf43	9.26956	10.4165	10.6202	10.7657	9.56397	8.59846	9.67714	6.85858	9.31711	8.16576	8.69708	10.2387	9.76365	8.31559	9.02026			10.1021	9.64271	8.61761	9.03385	9.03317
C12orf45	18.476	19.5904	19.4459	15.9415	19.4383	18.2624	17.2417	23.4734	19.4651	18.7072	17.0015	23.1747	17.9551	21.1282	21.3361			19.1708	17.8807	20.0601	19.6278	20.1398
C12orf49	11.6403	9.94369	9.29991	10.4416	11.6944	10.0887	13.9803	10.9269	11.5156	9.88904	9.59178	9.9173	10.5369	11.6118	12.6779			10.2946	10.7416	12.1409	9.79937	11.6089
C12orf5	24.5915	21.9943	25.2389	22.0234	23.9963	23.5131	22.9076	24.8011	26.5074	21.8478	23.2766	24.2332	25.5084	24.3378	25.8875			23.9416	23.1776	24.7387	23.1192	25.2446
C12orf50	0.175292	0.167415	0.0639264	0.0509733	0.085504	0.0689967	0.0831928	0.0665282	0.0563969	0.0603642	0.0661898	0.0558164	0.0235355	0.0389337	0.108509			0.135544	0.0684913	0.068706	0.0607901	0.0569927
C12orf54	0	0	0	0.0329402	1.67337e-12	0	0	0.0402974	0	0	0	0.000646782	2.90083e-13	1.33965e-13	0			0	0.0109801	0.0134325	0.000215594	1.41349e-13
C12orf56	0.432443	0.596601	0.775784	0.529235	0.603756	0.503995	0.636605	0.69443	0.396029	0.806324	0.558772	0.535116	0.479104	0.718702	0.547851			0.601609	0.545662	0.575688	0.633404	0.581886
C12orf57	55.893	63.3689	57.9611	73.0685	74.7933	75.5269	64.6814	80.7961	57.6052	68.1187	57.43	62.5179	62.344	66.5348	56.9773			59.0743	74.4629	67.6942	62.6889	61.952
C12orf60	1.04708	1.02794	1.26276	1.37497	0.699272	1.14282	0.676046	1.65771	1.35862	1.16856	1.43665	2.27157	1.57766	1.58896	1.4978			1.11259	1.07235	1.23079	1.62559	1.55481
C12orf65	5.35292	5.97384	5.68056	5.93475	6.2879	3.89453	5.58677	6.63813	7.62557	6.94872	7.53652	5.59168	7.09227	6.8785	7.87795			5.66911	5.37239	6.61682	6.69231	7.28291
C12orf66	2.30225	2.16002	1.87137	2.24593	1.97463	2.11939	1.85818	1.79698	2.2181	1.59985	1.84153	1.628	1.75689	2.05132	1.848			2.11121	2.11332	1.95775	1.68979	1.8854
C12orf71	0.0584867	0.0352018	0.269535	0.0438661	0.0351259	0.0355944	0.0589808	0.0324293	0.0416577	0.0476705	0.0227001	0	0.0201449	0.00895482	0.0263254			0.121075	0.0381955	0.0443559	0.0234569	0.018475
C12orf73	3.32094	1.90201	2.67141	4.49523	2.825	3.80605	2.11196	8.87157	4.15928	2.02273	5.1181	2.48107	1.87766	2.87873	4.32023			2.63145	3.70876	5.0476	3.2073	3.02554
C12orf74	0	0	0	0	0	0	0	0	0	0	0	0	0	0	0			0	0	0	0	0
C12orf75	220.816	221.232	222.695	167.636	182.884	185.221	191.606	264.611	212.89	176.343	182.795	183.126	204.758	205.653	206.561			221.581	178.58	223.036	180.755	205.657
C12orf76	3.14009	2.97825	3.2066	2.83	2.89777	3.19516	3.43358	2.91032	3.29866	2.25565	2.47974	2.58728	2.98224	2.58745	3.09579			3.10831	2.97431	3.21419	2.44089	2.88849
C12orf77	0	0	0	0	0	0	0	0	0	0	0	0	0	0	0			0	0	0	0	0
C12orf80	0	0	0	0	0.0053628	0	0	0	0	0	0	0	0	0	0			0	0.0017876	0	0	0
C14orf1	19.0806	20.8242	17.1772	12.8388	15.8733	14.2137	18.0486	21.948	17.5011	15.5709	17.7551	16.2264	22.346	18.9807	15.5624			19.0273	14.3086	19.1659	16.5175	18.963
C14orf105	0	0.00940985	0	0.00105164	0	0	0	0	0	0	0	0.00108531	0.00669844	0.00105833	0			0.00313662	0.000350547	0	0.00036177	0.00258559
C14orf119	77.5206	71.9778	76.5708	70.4644	68.4284	64.8402	67.7782	79.2741	67.7438	71.069	72.7492	71.5839	77.0755	68.7935	80.4186			75.3564	67.911	71.5987	71.8007	75.4292
C14orf132	4.11928	3.46461	4.17373	7.79205	6.75218	3.98906	4.08856	3.02283	3.94763	5.70828	4.52901	6.34518	3.84816	4.03893	3.90295			3.91921	6.17776	3.68634	5.52749	3.93001
C14orf142	11.0349	9.19956	8.83206	13.3982	9.36623	11.217	11.9558	11.1338	10.8239	13.0307	10.6277	8.80225	12.0826	11.2091	12.9699			9.68884	11.3271	11.3045	10.8202	12.0872
C14orf159	11.6939	12.5163	11.6953	10.4452	12.1202	11.5093	13.7271	14.9261	12.9612	10.3129	11.5008	10.8543	11.4587	12.0481	11.819			11.9685	11.3582	13.8715	10.8893	11.7753
C14orf166	99.3052	100.213	107.622	92.5285	95.9608	93.999	95.4682	122.15	103.866	102.615	107.064	110.144	107.951	106.368	111.788			102.38	94.1628	107.161	106.608	108.702
C14orf169	5.09409	5.60113	5.63108	5.28689	4.94395	4.80931	5.09781	5.67857	5.66311	5.22813	5.42687	4.82524	5.2699	5.36646	6.22192			5.4421	5.01338	5.47983	5.16008	5.61943
C14orf177	0	0	0	0	0	0	0	0	0	0	0	0	0	0	0			0	0	0	0	0
C14orf178	0.128468	0.118441	0.280879	0.343671	0.0939794	0.158998	0.0390259	0.0700475	0.0747941	0.0683546	0.0525968	0.0668722	0.0846556	0.0829944	0.085788			0.175929	0.198883	0.0612892	0.0626079	0.0844793
C14orf180	0	0	0	0	0	0	0	0	0	0	0	0	0	0	0			0	0	0	0	0
C14orf2	68.2016	65.9112	73.9606	63.7713	65.2807	68.3091	67.9794	103.031	76.7756	80.7808	75.9346	80.2196	82.4587	84.6425	85.4			69.3578	65.787	82.5953	78.9783	84.1671
C14orf28	1.90752	1.35583	2.48377	2.18758	2.43326	1.92186	1.54322	2.32601	2.13909	2.17321	2.30894	1.98313	1.25989	1.46102	2.16529			1.91571	2.1809	2.00277	2.15509	1.62873
C14orf37	2.30709	2.15981	1.79016	1.8818	2.25921	2.15978	2.39161	2.3155	2.00895	2.68859	2.63894	2.35537	2.90753	3.1032	2.7025			2.08569	2.10026	2.23869	2.56097	2.90441
C14orf39	0.245082	0.271135	0.312682	0.257725	0.261928	0.249492	0.273442	0.25663	0.240669	0.308902	0.337859	0.314162	0.309663	0.277416	0.260923			0.2763	0.256382	0.256914	0.320308	0.282667
C14orf79	6.18511	6.18508	5.95091	5.20318	4.9524	5.70402	6.21532	6.48279	6.12434	5.75511	6.11246	5.97919	5.71214	6.52271	6.01842			6.10703	5.28653	6.27415	5.94892	6.08442
C14orf80	2.91729	3.56582	3.48544	2.34527	2.98817	3.13687	3.46854	3.38855	2.33373	3.18632	3.09473	3.28087	4.32841	3.11762	3.67824			3.32285	2.82344	3.06361	3.18731	3.70809
C14orf93	2.26487	2.53024	2.1817	1.77353	2.34694	1.70285	2.72949	2.25001	2.52722	1.85299	1.82643	2.11925	2.5702	2.45977	2.70626			2.3256	1.94111	2.50224	1.93289	2.57874
C15orf26	0.0639803	0.119739	0.22919	0.173582	0.181817	0.110787	0.0558987	0.0225709	0.114285	0.00643619	0.00132003	0.00106801	0.0448556	0.0577338	0.0573241			0.137636	0.155395	0.0642515	0.00294141	0.0533045
C15orf27	0.0705416	0.0424331	0.0617144	0.0905186	0.0320972	0.00920928	0.0152301	0.0161689	0.078438	0.0068957	0.0454211	0.0247048	0.0993929	0.0094457	0.059554			0.0582297	0.0439417	0.0366123	0.0256739	0.0561309
C15orf32	0	0.000464573	0	0	0	0	0.000290348	0	0	0	0	0	0.000165365	0	0.0166323			0.000154858	0	9.67827e-05	0	0.00559922
C15orf38-AP3S2	0.654723	1.58334	0.935108	0.938333	1.47485	0.903609	0.88143	1.11634	1.11854	0.685046	1.33839	1.65919	0.823137	0.674414	1.02715			1.05772	1.1056	1.03877	1.22754	0.841567
C15orf39	10.8406	12.2237	9.5779	12.1128	11.7353	11.9469	11.1933	8.6425	9.8397	8.62526	9.5425	8.67274	8.55274	8.93276	10.2817			10.8807	11.9317	9.89183	8.94683	9.25573
C15orf40	8.55676	10.6069	8.86685	9.79824	11.047	9.02432	8.24197	11.4359	12.6983	11.1488	10.3406	9.69725	10.8093	8.96131	11.5503			9.3435	9.95652	10.7921	10.3956	10.4403
C15orf41	7.53063	7.24569	6.8824	4.93834	6.10836	5.77427	8.17682	5.75021	7.29842	9.75045	6.92065	7.86234	7.15953	8.96266	7.87292			7.21957	5.60699	7.07515	8.17781	7.99837
C15orf43	0	0	0	0	0	0	0	0	0	0	0.00146132	0	0.000864551	0	0			0	0	0	0.000487107	0.000288184
C15orf48	0.221882	0.515288	0.404578	1.25955	1.06086	0.721073	1.56517	3.13871	1.79779	0.415697	0.0875724	0.398113	0.263042	0.508397	0.359535			0.380583	1.01383	2.16722	0.300461	0.376991
C15orf52	4.45514	4.51034	4.16175	4.20835	4.12841	3.72618	4.17777	3.08009	4.15149	3.79677	3.84985	3.62566	4.6151	4.14352	4.82567			4.37574	4.02098	3.80312	3.75743	4.5281
C15orf53	0	0	0	0	0	0	0	0	0	0	0	0	0	0	0			0	0	0	0	0
C15orf54	0.165433	0.205642	0.147621	0.502278	0.131826	0.218948	0.184725	0.245021	0.259945	0.301617	0.369946	0.156262	0.376698	0.487461	0.319101			0.172899	0.284351	0.229897	0.275942	0.39442
C15orf56	0	0	0	0.00478183	0	0	2.59772e-49	0	0	0	0	2.88623e-77	9.13576e-191	0	0			0	0.00159394	8.65907e-50	9.62077e-78	3.04525e-191
C15orf57	10.2836	8.7459	10.3024	8.60813	9.71574	8.96539	9.38627	11.1411	9.88164	11.0562	11.5826	11.3741	10.0125	9.89987	11.0726			9.7773	9.09642	10.1363	11.3376	10.3283
C15orf59	0.379543	0.275698	0.22702	0.346182	0.0912679	0.172379	0.405211	0.507965	0.427665	0.163428	0.277358	0.196351	0.113369	0.174606	0.385676			0.294087	0.203276	0.446947	0.212379	0.22455
C15orf61	6.77236	8.03831	7.08114	6.42733	6.37464	7.0139	9.45264	9.61887	6.54636	5.5255	9.11306	6.43326	9.27594	8.86615	9.33956			7.29727	6.60529	8.53929	7.02394	9.16055
C15orf62	0.26371	0.193148	0.255547	0.169368	0.157076	0.121309	0.230138	0.0269568	0.138436	0.191146	0.242351	0.155177	0.280759	0.312319	0.18158			0.237468	0.149251	0.131844	0.196225	0.258219
C15orf65	2.66331	2.52477	3.69385	2.499	1.96324	2.44059	1.84022	2.94266	2.23816	4.29637	4.32261	5.92488	3.14033	3.92646	2.46961			2.96064	2.30094	2.34035	4.84795	3.1788
C16orf13	35.566	40.9612	41.6793	38.4606	43.5108	41.1595	44.0632	49.7077	34.6652	38.332	48.9252	41.3678	44.9478	41.555	43.7681			39.4022	41.0436	42.812	42.875	43.4236
C16orf45	13.9454	15.1202	12.9499	18.2846	16.2497	13.0615	14.0774	12.9536	13.9447	18.6669	17.6128	17.056	16.5734	13.447	16.6296			14.0052	15.8653	13.6586	17.7786	15.55
C16orf46	1.48147	1.10299	1.17512	1.36584	1.29392	1.36757	1.06631	1.31046	1.29866	1.06449	0.911782	0.827123	1.35339	1.35597	1.42026			1.25319	1.34244	1.22514	0.934465	1.37654
C16orf47	0	0	0	0.0247479	0.0262331	0	0	0.0848917	0	0.00157568	0.00371638	0	0.00109935	0.12092	0.0229689			0	0.0169937	0.0282972	0.00176402	0.0483294
C16orf52	43.1977	42.1983	35.211	45.6124	44.1853	41.7813	35.2303	31.2604	39.187	42.8309	41.8132	38.4551	41.3939	34.1172	35.3965			40.2023	43.8597	35.2259	41.0331	36.9692
C16orf54	0	0.022729	0	0	0	0.0728847	0	0	0	0	0	0	0	0	0			0.00757633	0.0242949	0	0	0
C16orf58	21.3479	22.5182	20.9472	21.6807	21.557	23.2992	22.9656	21.844	20.6727	21.0763	21.659	20.7263	20.9455	21.6889	20.6603			21.6044	22.179	21.8274	21.1539	21.0982
C16orf59	3.80843	3.65078	3.26388	2.21188	2.15633	3.11577	3.202	3.36279	3.00547	3.75905	3.18521	3.68548	4.43958	4.10144	4.15396			3.57436	2.49466	3.19009	3.54325	4.23166
C16orf62	14.4429	14.1261	14.4598	14.4839	14.5171	13.5865	14.6874	16.0826	13.9855	13.8234	14.9706	14.548	14.4974	15.1471	15.0936			14.3429	14.1958	14.9185	14.4473	14.9127
C16orf70	6.33173	6.49639	5.79491	6.29879	6.90407	6.02837	6.76301	7.14347	6.661	5.98176	6.76551	7.11981	7.70213	6.92645	7.51204			6.20768	6.41041	6.85583	6.62236	7.38021
C16orf71	0.0568342	0.0857785	0.121757	0.130986	0.11864	0.0762563	0.215294	0.0787015	0.114626	0.111521	0.122099	0.0608303	0.140684	0.178353	0.16763			0.0881232	0.108627	0.136207	0.0981501	0.162222
C16orf72	28.1565	28.2734	28.359	32.3527	30.9668	28.6476	27.8857	24.4948	26.4536	28.2785	28.0673	27.1834	28.1285	27.028	26.7156			28.263	30.6557	26.278	27.8431	27.2907
C16orf74	2.60632	3.28065	2.58204	3.69005	2.88709	4.67564	4.88962	3.7525	2.34773	3.19771	2.94442	3.38145	3.1019	3.20622	2.68351			2.823	3.75093	3.66328	3.17453	2.99721
C16orf78	0.00110527	0.00106951	0	0	0	0	0	0	0	0	0	0	0.000380695	0	0.000248746			0.000724927	0	0	0	0.000209814
C16orf82	0	0	0	0	0	0	0	0	0	0	0	0	0	0	0			0	0	0	0	0
C16orf86	0.415126	0.657088	0.864384	0.414546	0.481161	0.415453	0.722356	0.553965	0.838748	0.455757	0.570957	0.367283	0.650678	0.646822	0.549234			0.645533	0.437053	0.705023	0.464666	0.615578
C16orf87	7.10877	5.51926	7.02682	6.63141	5.91675	7.39218	5.29927	6.33794	5.77644	4.72964	4.83779	3.99467	4.80314	4.7855	4.5382			6.55162	6.64678	5.80455	4.5207	4.70895
C16orf89	0.0411279	0.00352014	0.038184	0.00110693	0.00234672	0.00295193	0.00146668	0.00134465	0.0403883	0.0143672	0.00705965	0.0068542	0.0114151	0.00334191	0.00545807			0.0276107	0.00213519	0.0143999	0.00942702	0.00673836
C16orf90	0.0138252	0	0	0	0	0.0504831	0.0501655	0.0646379	0.0136292	0	0.0160977	0.0130243	0	0.0800378	0.0124457			0.0046084	0.0168277	0.0428109	0.00970733	0.0308278
C16orf91	12.4128	13.0963	10.6688	10.9092	15.1723	13.1831	14.707	16.0943	13.1198	9.31687	10.6844	12.8203	13.2442	15.8815	14.159			12.0593	13.0882	14.6404	10.9405	14.4282
C16orf92	0	0	0	0	0	1.00995e-14	0	0	0	0	0	0	0.0166395	0	0			0	3.3665e-15	0	0	0.0055465
C16orf93	0.866847	0.829762	0.517238	0.650349	1.01441	0.718611	0.577681	0.631556	0.722218	0.850282	0.96681	0.467635	0.593638	0.739149	0.619612			0.737949	0.794457	0.643818	0.761576	0.6508
C16orf95	2.342	2.51731	2.87821	2.39448	2.58418	2.93183	2.74597	3.09006	2.89121	2.49683	2.51098	2.93219	3.05064	2.7571	3.21556			2.57917	2.63683	2.90908	2.64667	3.00777
C16orf96	0.0674487	0.0511679	0.0603483	0.0550853	0.0685314	0.0485267	0.0543871	0.0809939	0.0589547	0.0556651	0.0643167	0.0706734	0.0575487	0.0720059	0.0721226			0.059655	0.0573811	0.0647786	0.0635517	0.0672257
C16orf97	0	0	0	0	0	0	0	0	0	0	0	0	0	0	0			0	0	0	0	0
C17orf100	0.580933	0.481833	0.340479	0.55087	0.662507	0.505071	0.752846	0.59683	0.368165	0.450672	0.555643	0.390914	0.500234	0.648034	0.691061			0.467748	0.572816	0.572614	0.465743	0.61311
C17orf102	0.0074103	0	0	0.0152629	0	0	0.00896296	0.00821752	0.0146108	0	0	0	0	0	0			0.0024701	0.00508763	0.0105971	0	0
C17orf104	0.153611	0.102586	0.134013	0.300666	0.179065	0.168763	0.0759628	0.170473	0.0867093	0.13001	0.0576608	0.118734	0.124769	0.14409	0.129083			0.13007	0.216165	0.111048	0.102135	0.132647
C17orf105	0.088547	0.196812	0.00822704	0.0133799	0.0575492	0.0173194	0.107664	0.0249977	0.00444121	0.0146786	0.00543146	4.48345e-110	0.0101936	0.0892782	1.73847e-47			0.097862	0.0294162	0.045701	0.00670335	0.0331573
C17orf107	0.215996	0.0221827	0.0717087	0.163296	0.217214	0.145677	0.195456	0.0433813	0.15006	0.128784	0.117326	0.103976	0.174442	0.0194428	0.156695			0.103296	0.175396	0.129632	0.116695	0.11686
C17orf112	0	0	0	0	0	0	0	0	0	0	0	0	0	0	0			0	0	0	0	0
C17orf47	0	0	0	0	0	0	0	0	0	0	0	0	0	0.0138568	0.0120191			0	0	0	0	0.0086253
C17orf49	35.0487	35.1482	35.7843	34.5863	35.1337	38.8633	37.3304	43.4499	36.9969	30.3485	33.2151	30.3728	38.4035	35.3884	35.5628			35.3271	36.1944	39.2591	31.3121	36.4516
C17orf50	0	0.00317501	0	0.0112421	0	0.123376	0	0	0	0.00525268	0	0	0	0.00530158	0.0282652			0.00105834	0.0448727	0	0.00175089	0.0111889
C17orf51	6.01295	7.58083	6.41238	5.87628	6.62142	6.04626	6.00778	5.36794	6.03296	6.93071	6.23888	5.64394	7.62793	7.60189	7.11136			6.66872	6.18132	5.80289	6.27118	7.44706
C17orf53	2.64983	3.24269	3.4767	2.01684	2.59384	2.38019	2.9777	3.07422	3.01632	3.16875	3.11719	2.70887	3.26985	3.32693	3.15233			3.12307	2.33029	3.02275	2.99827	3.2497
C17orf58	2.57442	3.45111	2.80824	3.19523	2.71022	4.7635	2.06106	3.04629	3.81665	3.16779	4.30556	5.00645	2.79672	2.57693	3.38821			2.94459	3.55632	2.97467	4.15993	2.92062
C17orf59	1.727	1.87804	2.2193	1.77168	1.95757	1.86183	2.36748	2.68132	2.0106	1.80259	2.04919	1.59597	2.45868	1.79805	2.59113			1.94145	1.86369	2.35313	1.81592	2.28262
C17orf62	17.557	14.1925	13.6167	12.7878	13.1228	14.2927	16.0963	15.3693	12.7044	14.4327	15.0786	15.1471	14.3099	14.1547	13.797			15.1221	13.4011	14.7233	14.8861	14.0872
C17orf64	0.00277167	0.16147	0	0.10914	0.0538221	0.0938039	0	0.0734888	0.164503	0	0	0.0624091	0.00190932	0.0443812	0.150217			0.0547472	0.0855887	0.0793306	0.020803	0.0655025
C17orf67	1.03256	1.49032	1.90976	1.33449	1.27854	1.36535	1.57221	1.85485	1.12428	1.59239	0.993063	1.2781	1.68807	1.39431	1.61082			1.47755	1.32613	1.51711	1.28785	1.5644
C17orf70	9.48349	9.37511	9.17126	9.16859	8.80934	10.5756	10.0038	9.03896	9.02544	9.03283	9.05874	9.60674	10.7671	9.97696	10.2707			9.34329	9.51784	9.35607	9.23277	10.3383
C17orf74	0	0	0	0.0413321	0.0338915	0	0.0336725	0	0.0379799	0.141084	0.0803399	0.0329958	0.120814	0	0.062355			0	0.0250745	0.0238841	0.0848066	0.0610563
C17orf75	6.60338	6.51112	5.98681	6.01651	6.19058	6.4475	5.89022	7.46385	5.97128	5.43543	6.03031	6.27487	6.52569	7.96025	7.6436			6.3671	6.2182	6.44178	5.91354	7.37651
C17orf77	0	0	0	0	0	0	0	0	0	0	0	0	0	0	0			0	0	0	0	0
C17orf78	0	0.00326966	0.000628954	0.0255009	0.00256617	7.93221e-317	2.15571e-123	0.000986787	0	0	1.32754e-78	0	7.03806e-75	0	3.22506e-229			0.00129954	0.0140335	0.000328929	4.42513e-79	2.34602e-75
C17orf80	6.74394	6.50315	5.96384	5.09432	5.42597	5.27509	5.74697	5.85171	6.96409	7.12665	7.13065	7.8767	6.70383	7.23932	7.46464			6.40364	5.26513	6.18759	7.378	7.13593
C17orf82	0.15277	0.0410625	0	0.174319	0.143717	0.232432	0.0617727	0.167597	0.104662	0.100469	0.148237	0.0465593	0.21298	0.180208	0.0459761			0.0646108	0.183489	0.111344	0.0984218	0.146388
C17orf85	10.5701	8.20102	9.64927	8.92409	8.50828	8.66455	10.2258	7.63448	10.1512	10.5228	9.85721	9.80522	10.9315	10.4641	10.2026			9.47346	8.69897	9.33716	10.0617	10.5327
C17orf89	23.8945	24.4316	24.526	23.0505	24.5789	27.9	26.9071	32.8396	20.4672	22.4472	29.3527	24.4977	30.3393	28.4837	30.2959			24.284	25.1765	26.738	25.4325	29.7063
C17orf96	3.32364	3.78208	3.11479	3.56789	3.4586	3.74036	3.9751	3.7475	3.88974	3.17159	3.56728	2.99117	3.40876	3.20679	3.20094			3.40684	3.58895	3.87078	3.24335	3.27216
C17orf97	1.61741	2.20724	1.65662	1.7571	1.6795	1.91718	1.84624	2.26082	1.69014	1.9254	1.5323	2.09508	1.94296	1.6268	2.08043			1.82709	1.78459	1.9324	1.85093	1.8834
C17orf98	0.0176657	0.150683	0	0.14728	0.31613	0.112168	0.0149569	0.00783573	0.00696612	0.0763272	0.00411389	0.00665693	0.00730162	0.0830345	0.0151078			0.0561162	0.191859	0.00991958	0.0290327	0.035148
C17orf99	0.00203982	0.00197383	0.0024796	0.00124136	0.00394758	0	0.0131584	0.0105557	0.00670303	0.00469935	0	0.00576497	0.0475063	0.043462	0.00122419			0.00216442	0.00172965	0.010139	0.00348811	0.0307308
C18orf21	17.2924	17.7467	15.7056	17.8118	18.6827	15.9626	19.6951	23.9521	19.9476	15.6352	17.1853	18.1131	18.2341	18.0567	18.3251			16.9149	17.4857	21.1983	16.9779	18.2053
C18orf25	6.76601	7.04224	6.36678	7.98644	6.93696	6.83753	7.0743	5.44274	7.23826	7.48041	5.73637	6.79557	7.38288	6.10601	7.34209			6.72501	7.25364	6.5851	6.67078	6.94366
C18orf32	19.7462	26.1768	21.7345	24.3183	17.6607	20.7599	10.8055	15.7436	18.1784	12.2565	16.0735	19.3335	14.5938	12.4494	18.8313			22.5525	20.913	14.9092	15.8878	15.2915
C18orf42	0.0268056	0	0.0244383	0	0	0	0	0	0	0	0	0	0.0092503	0.816235	0.0120652			0.0170813	0	0	0	0.279184
C18orf54	2.06116	2.60852	1.99986	1.47883	1.74991	1.85016	2.18233	1.72439	1.83443	2.74728	2.93461	1.72152	3.11106	3.09764	2.48713			2.22318	1.69297	1.91372	2.4678	2.89861
C18orf63	0	0	0	0.0105557	0	0	0	0	0	0	0	0	0.0104493	0.0053114	0			0	0.00351857	0	0	0.00525357
C18orf65	0.105959	0.308312	0.410578	0.26948	0.184148	0.116059	0.236011	0.0999599	0.324372	0.342247	0.355005	0.296011	0.237861	0.165609	0.328007			0.27495	0.189896	0.220114	0.331088	0.243826
C18orf8	13.6808	13.3228	14.7862	15.4408	14.4509	16.191	12.1138	15.9612	13.3687	11.5614	11.4721	12.545	14.9018	13.6693	14.6208			13.9299	15.3609	13.8146	11.8595	14.3973
C19orf12	11.8004	17.741	14.5193	14.5256	14.6668	9.26694	6.63835	11.6143	11.0305	11.2796	8.62116	11.4353	16.3256	13.5317	13.0152			14.6869	12.8198	9.76105	10.4454	14.2908
C19orf18	0.628128	0.77782	1.25503	0.725028	0.749818	0.408382	0.446379	0.426652	0.414792	0.495086	0.64318	0.705778	0.618118	0.757657	0.485702			0.886993	0.627743	0.429274	0.614681	0.620492
C19orf24	37.1466	37.5002	35.4525	39.5406	40.4996	41.1142	41.1601	45.9621	36.8655	35.0969	36.2318	38.7949	37.5994	39.6844	38.4641			36.6998	40.3848	41.3292	36.7079	38.5826
C19orf25	12.1031	11.9045	11.0464	10.2972	10.6111	11.5384	10.7009	11.7037	11.3906	9.58943	10.8401	11.0887	11.1557	11.3197	10.8741			11.6847	10.8156	11.2651	10.5061	11.1165
C19orf26	4.26908	4.47407	3.528	5.21525	4.85376	5.29125	4.53963	2.91004	4.29744	3.86618	4.36688	3.64773	3.97376	4.23125	4.47768			4.09038	5.12009	3.9157	3.96026	4.22756
C19orf33	0	0	0	0	0	0	0	0	0	0	0	0	0	0	0			0	0	0	0	0
C19orf35	0.0237574	0.00740223	0.043337	0.0560721	0.0446598	0.0565833	0.0575344	0.0526569	0.0349783	0.0117105	0.013837	0.00720657	0.0163453	0.0110016	0.0106978			0.0248322	0.0524384	0.0483899	0.010918	0.0126816
C19orf38	0.350728	0.326004	0.318753	0.588357	0.394083	0.473418	0.339765	0.255619	0.258448	0.252049	0.205029	0.323552	0.539643	0.508215	0.467747			0.331828	0.485286	0.284611	0.26021	0.505202
C19orf40	1.5662	1.92501	2.18041	3.00385	1.72254	3.43431	2.56333	2.68161	2.02569	2.51225	3.83752	2.94359	2.82937	2.40141	2.77377			1.89054	2.72023	2.42354	3.09779	2.66818
C19orf43	98.1208	103.379	93.3669	92.055	98.7912	97.7424	100.072	117.807	90.2899	95.9063	104.213	99.8403	111.062	103.379	102.585			98.2889	96.1962	102.723	99.9865	105.675
C19orf44	2.95263	2.66137	3.2743	2.39602	2.8856	2.5119	2.78439	2.16998	2.65957	2.89762	3.46929	2.94554	2.70489	3.23265	2.91082			2.96277	2.59784	2.53798	3.10415	2.94945
C19orf45	0.0927466	0.0240214	0	0.0747806	0.0443446	0.00978737	0.00389032	0.00178333	0	0.00317571	0.0037451	0.00303009	0.0744309	0.0293889	0.0633018			0.0389227	0.0429709	0.00189122	0.00331697	0.0557072
C19orf47	7.33933	7.40568	7.32839	6.40331	7.50927	6.8391	6.5685	5.99285	6.48725	6.85735	6.10518	5.93318	7.7387	6.87787	6.72183			7.3578	6.91723	6.34953	6.29857	7.1128
C19orf48	42.9874	42.9584	43.4965	34.6163	39.3589	31.5272	44.3278	46.8455	36.9669	38.908	48.1575	41.1697	53.6425	45.6854	48.0577			43.1474	35.1675	42.7134	42.7451	49.1285
C19orf52	5.63085	5.47798	5.82932	5.39732	5.7562	5.31125	4.63244	5.85956	5.46875	6.05499	5.64945	5.41866	5.9675	5.22651	5.9241			5.64605	5.48826	5.32025	5.7077	5.70604
C19orf53	114.442	118.331	127.098	105.787	119.228	118.321	125.153	140.619	125.925	115.084	116.262	122.353	133.351	121.114	126.871			119.957	114.445	130.566	117.9	127.112
C19orf54	3.2817	3.71556	4.50265	3.33981	3.03747	2.88536	3.10591	2.90901	3.23683	2.52337	2.80584	2.8891	3.60067	3.14954	3.62785			3.8333	3.08755	3.08392	2.73944	3.45935
C19orf57	0.0157122	0.134762	0.0997744	0.0559202	0.0738658	0.101072	0.140961	0.0853377	0.0550278	0.160519	0.173663	0.105638	0.179726	0.143354	0.07777			0.0834162	0.0769527	0.0937755	0.146607	0.133617
C19orf60	10.8944	10.357	10.8181	9.30994	8.40376	10.645	11.7079	11.8779	8.89689	9.23168	11.3206	9.55963	12.3759	8.20349	10.6618			10.6898	9.4529	10.8276	10.0373	10.4137
C19orf66	64.3034	78.9219	68.0683	75.3416	74.0684	80.0014	71.4135	62.3594	53.947	34.457	46.3256	39.2699	26.7518	35.2846	37.3905			70.4312	76.4705	62.5733	40.0175	33.1423
C19orf67	0.0451841	0.0136297	0	0	0.00681472	0.00857222	0	0.00780984	0.0315004	0	0.00820032	0	0.0156326	0	0.00633996			0.0196046	0.00512898	0.0131034	0.00273344	0.00732419
C19orf68	1.93865	2.11979	1.89888	2.02572	1.8748	2.26158	2.279	2.04163	2.08648	1.74949	1.72953	1.54242	2.17083	1.94446	1.66808			1.98577	2.05403	2.1357	1.67381	1.92779
C19orf70	70.1524	78.898	90.3681	67.633	75.8713	77.7645	78.4187	105	64.5642	76.974	85.9161	76.196	81.4663	81.7994	80.5485			79.8062	73.7563	82.661	79.6954	81.2714
C19orf71	3.3199	3.5188	3.24709	3.41295	3.64221	3.01319	3.37307	2.38054	3.88576	2.4412	2.76865	2.69233	2.69221	2.88198	2.91967			3.36193	3.35612	3.21312	2.63406	2.83129
C19orf73	0.417691	0	0.285617	0.285966	0.138052	0.366564	0.126301	0.289571	0.257357	0.154652	0.215274	0.344308	0.530276	0.479641	0.0940032			0.234436	0.263527	0.22441	0.238078	0.367973
C19orf80	4.71066e-116	0.0350926	2.77709e-173	7.06389e-152	2.39855e-259	0	0	7.66731e-115	0	0	0	0	2.85779e-18	0.0109418	4.1673e-177			0.0116975	2.35463e-152	2.55577e-115	0	0.00364727
C19orf81	0	0.00103216	0	0	0.0868291	0.00129832	0	0.00118281	0.00210309	0.00105317	0	0	0	0.000994316	0.00104463			0.000344053	0.0293758	0.0010953	0.000351057	0.000679649
C19orf84	0.0252625	0.0488883	0	0.0711459	0	0	0.0305529	0.0560324	0.124522	0.0781183	0.0294129	0.0237974	0.0764159	0.0696202	0.0683493			0.0247169	0.0237153	0.0703691	0.0437762	0.0714618
C1D	7.11926	7.5372	6.64225	6.12954	6.21384	5.87543	4.94451	7.46811	7.40169	5.77073	5.47923	6.42799	9.51255	7.46324	7.89211			7.09957	6.07294	6.60477	5.89265	8.2893
C1GALT1	14.0651	15.0578	14.5599	14.7591	14.4029	14.9466	14.5907	14.0505	16.3645	14.4303	11.3342	12.9341	16.2377	17.0179	15.2065			14.5609	14.7029	15.0019	12.8995	16.154
C1GALT1C1	27.3078	26.5073	29.2795	24.4323	27.2264	26.1801	25.0449	33.5435	31.9504	33.3469	31.6572	37.59	29.0508	30.3877	32.9658			27.6982	25.9463	30.1796	34.198	30.8014
C1orf100	0.145753	0.141011	0.212696	0.213043	0.197574	0.212803	0.141157	0.161695	0.230061	0.0863645	0.169821	0.0825206	0.140667	0.187549	0.210013			0.166487	0.207807	0.177638	0.112902	0.17941
C1orf101	0.212911	0.343009	0.0921925	0.244409	0.191814	0.148568	0.354054	0.264373	0.22778	0.284305	0.317828	0.27086	0.231145	0.227071	0.181322			0.216037	0.19493	0.282069	0.290998	0.213179
C1orf105	0.0291603	0	4.2102e-193	0.0011235	0.000595064	0.00291531	0.00223228	0.00273051	0.00181807	0.000606982	0.000696778	0	0.0029683	0.000564943	0.00110747			0.0097201	0.00154462	0.00226029	0.000434587	0.0015469
C1orf106	0.0330963	0.0175513	0.0620102	0.0401992	0.0645361	0.0174972	0.0812284	0.0372839	0.0622923	0.00708666	0.00836464	0.0331714	0.0460454	0.00329652	0.0561968			0.0375526	0.0407442	0.0602682	0.0162076	0.0351796
C1orf109	8.43992	8.89595	8.8595	8.5225	8.07803	9.06566	8.7296	9.92592	9.22099	9.44897	9.15916	8.87903	9.62231	9.67139	10.2729			8.73179	8.5554	9.29217	9.16239	9.85553
C1orf110	0.126	0.151834	0.07068	0.110672	0.162474	0.198514	0.239377	0.270771	0.121733	0.436253	0.140516	0.498306	0.522763	0.221794	0.074294			0.116171	0.15722	0.210627	0.358358	0.27295
C1orf111	0	0.00907655	0	0	0.0281098	0	0	0	0	0	0.0109218	0	0	0	0			0.00302552	0.00936993	0	0.0036406	0
C1orf112	3.62436	3.24038	4.81815	2.83463	3.05522	2.56941	4.3036	4.32654	3.79111	4.20115	4.2126	3.50726	5.44828	4.8463	5.20863			3.8943	2.81975	4.14042	3.97367	5.16774
C1orf115	4.16432	4.30495	4.24123	3.4026	4.2066	4.28974	4.26296	4.79808	4.43572	4.6735	4.94328	4.92782	3.39357	3.31228	3.18181			4.23683	3.96631	4.49892	4.8482	3.29589
C1orf116	0.250733	0.412891	0.601331	0.453031	0.162048	0.302487	0.197522	0.157138	0.0872103	0.0648677	0.0790901	0.0310677	0.225581	0.241718	0.143751			0.421652	0.305855	0.14729	0.0583418	0.203683
C1orf122	17.793	18.0207	18.2382	20.1721	21.1708	22.6153	18.04	24.3729	18.1779	18.4426	20.0598	22.7244	21.6407	21.495	21.9572			18.0173	21.3194	20.1969	20.4089	21.6976
C1orf123	26.5056	28.4882	25.124	21.7604	22.7149	24.3284	27.1504	30.1596	25.8694	25.7132	26.2278	27.1926	28.8022	25.9661	28.5265			26.7059	22.9346	27.7265	26.3779	27.7649
C1orf127	0.0445982	0.015848	0.118914	0.013776	0.00153762	0.0201653	0	0	0	0	0.0189816	0.000748504	0.0316203	0.0391715	0.0146624			0.0597867	0.0118263	0	0.0065767	0.0284847
C1orf131	8.39497	7.64598	9.61609	6.65074	8.01459	7.95513	7.60441	10.8279	8.85018	8.00476	7.53453	7.72812	8.3906	7.96662	8.3958			8.55235	7.54015	9.09416	7.7558	8.25101
C1orf137	0	0.00221267	0	0	0	0	0	0	0.00225423	0	0.00532501	0	0	0	0			0.000737557	0	0.00075141	0.001775	0
C1orf141	0.000570271	0	0	0	0	0	0	0.00126473	0	0	0	0	9.82108e-05	0	0			0.00019009	0	0.000421577	0	3.27369e-05
C1orf146	0.0081152	0.000981582	0.00208085	0.00648194	0.00588937	0.00370412	0.0112469	0.00562427	0.00400009	0.00300469	0.00393713	0.00477818	0.00646381	0.00512534	0.00395711			0.00372588	0.00535848	0.00695709	0.00390667	0.00518209
C1orf158	0	0	0	0	0	0	0	0	0	0	0	0	0	0	0			0	0	0	0	0
C1orf159	5.18914	4.41084	5.10316	3.74504	4.31781	4.91387	4.55924	5.09571	4.08349	3.95894	4.84223	4.50327	5.46215	5.04996	4.68775			4.90105	4.32557	4.57948	4.43481	5.06662
C1orf162	1.98884	2.25203	1.94233	2.5795	2.03664	2.36327	0.875599	0.850195	1.50764	0.20232	0.451635	0.305511	1.21195	1.26499	0.788638			2.06107	2.32647	1.07781	0.319822	1.08853
C1orf167	0.00153378	0.00175141	0.00670343	0.0133897	0.00783827	0	0.016481	0.0135275	0.00778535	0.0198959	0	0.0099802	0.0055742	0.00221079	0.0101538			0.00332954	0.00707599	0.012598	0.0099587	0.0059796
C1orf168	0.0168264	0	0.00101753	0.0266369	0.000269989	0.000679238	0.00101245	0.000309402	0.00091689	0.0604218	0.0366028	0.0715856	0.0329838	0.000256324	0.0141272			0.00594798	0.00919538	0.000746247	0.0562034	0.0157891
C1orf174	15.3376	16.852	15.0369	13.8545	15.3771	14.9848	17.2853	16.7333	16.4351	14.4876	14.8839	14.9563	18.6361	15.334	16.5742			15.7422	14.7388	16.8179	14.7759	16.8481
C1orf177	0.00546329	0.00226566	0.0563766	0.0042747	0.0560756	0.00949972	0.0439988	0.00519271	0.0577952	0.00616475	0.00999634	0.0600262	0.00752701	0.00573585	0.00562075			0.0213685	0.0232833	0.0356622	0.0253958	0.00629454
C1orf185	0	0	0.00224464	0.000280934	0	0	0	0	0	0	0	0	0.000424008	0	0.000554095			0.000748213	9.36447e-05	0	0	0.000326034
C1orf186	0.000564439	0	0.000720436	0.00077287	0.000819252	0.00377863	0.0013654	0.000208633	0.000556439	0.000743062	0.00142397	0.000265871	0.00194413	0.0033704	0.000203247			0.000428292	0.00179025	0.000710157	0.000810968	0.00183926
C1orf189	0.788007	0.607962	0.0979211	0.570971	0.221138	0.548355	0.0679494	0.062208	0	0.0534765	0	0.105849	0.157766	0.0516984	0.00714921			0.497963	0.446821	0.0433858	0.0531085	0.0722045
C1orf194	0.0726152	0.0457894	0.121649	0.0408418	0.0699988	0.0620597	0.178682	0.00403852	0.0107708	0.0651285	0.0212026	0.0205855	0.0886101	0.134663	0.0295065			0.0800179	0.0576334	0.0644971	0.0356389	0.0842599
C1orf195	0	2.18905e-29	0	4.97387e-250	6.45208e-19	0	0	0	0	5.61255e-29	4.57326e-27	0	8.3307e-100	6.45129e-13	0.000930138			7.29683e-30	2.15069e-19	0	1.54313e-27	0.000310046
C1orf198	17.7788	18.5283	17.497	22.5444	19.5641	20.2428	20.79	19.2972	17.7303	14.3758	16.3783	14.5619	18.1898	17.3415	18.8457			17.9347	20.7838	19.2725	15.1053	18.1257
C1orf204	0.343728	0.429572	0.416777	0.317227	0.416731	0.343914	0.331896	0.371311	0.420141	0.328544	0.340208	0.285725	0.424875	0.416213	0.387082			0.396692	0.359291	0.374449	0.318159	0.40939
C1orf21	8.80506	6.9151	11.0828	5.47174	7.48684	6.76205	6.53241	7.90675	7.33649	10.404	12.145	7.0933	7.74703	7.6831	8.56052			8.93432	6.57354	7.25855	9.88077	7.99688
C1orf210	0.395143	0.21757	0	0.170812	0.113121	0.0569361	0	0.0778183	0.13835	0	0	0	0.0161102	0.021484	0.14277			0.204238	0.113623	0.0720561	0	0.0601214
C1orf216	7.60696	8.51774	8.24354	8.36433	7.82356	7.84277	9.0394	8.71599	7.35988	8.41046	8.48739	7.77883	8.70694	7.92544	8.12244			8.12275	8.01022	8.37176	8.22556	8.25161
C1orf226	0.0501666	0.0832177	0.0851479	0.22874	0.168905	0.130858	0.120948	0.101455	0.105977	0.0424558	0.108825	0.0964502	0.252606	0.0922267	0.121521			0.0728441	0.176168	0.10946	0.082577	0.155451
C1orf228	0.275333	0.457808	0.378881	0.190609	0.251703	0.497492	0.199795	0.388052	0.266756	0.172048	0.442689	0.474001	0.328314	0.347218	0.339726			0.370674	0.313268	0.284868	0.362913	0.338419
C1orf229	0	0.0132475	0.024963	0.0249945	0	0.0166637	0.0675659	0.0202431	0.05296	0.0135172	0.0637631	0.0515895	0.0565874	0.050307	0.0123244			0.0127368	0.0138861	0.046923	0.0429566	0.0397396
C1orf233	2.14835	2.15103	1.84983	1.86578	2.00663	2.32438	1.94886	3.01119	2.14732	1.62033	1.98034	1.70064	2.00408	1.52131	1.92055			2.04974	2.0656	2.36912	1.7671	1.81531
C1orf234	0.0911483	0.160428	0	0.0159915	0.0169512	0.211783	0.00706289	0.00647544	0	0.00576552	0.00679925	0.0110023	0.0040226	0.0214576	0.0105135			0.0838588	0.0815752	0.00451278	0.00785569	0.0119979
C1orf27	8.7137	10.0798	8.04151	9.43622	9.30664	9.17628	8.21511	7.23119	8.94508	9.7416	9.34824	9.53554	9.14754	8.30605	8.61407			8.945	9.30638	8.13046	9.54179	8.68922
C1orf35	7.54555	8.76792	6.97132	8.32255	8.25885	7.83427	10.0742	10.0521	9.11017	8.12666	8.1429	8.67101	8.76713	9.59526	9.33512			7.7616	8.13856	9.74549	8.31352	9.2325
C1orf43	82.5565	90.372	91.9147	97.0169	104.843	90.5243	88.0038	104.412	90.2764	89.8379	78.135	86.7575	86.4516	83.5341	84.5871			88.2811	97.4614	94.2307	84.9101	84.8576
C1orf50	7.96493	7.94942	7.07385	7.33167	6.73718	7.59427	9.8164	8.37122	8.83187	7.65595	6.96365	8.84603	7.6958	7.2697	8.68658			7.66273	7.22104	9.0065	7.82188	7.88403
C1orf52	22.0753	24.5354	20.5537	26.3567	27.9731	27.2922	20.4044	23.2798	22.6235	19.0275	18.542	17.8555	18.8163	19.5908	19.9098			22.3881	27.2073	22.1026	18.475	19.439
C1orf53	1.59762	1.46067	1.70473	1.45577	1.36392	1.53566	1.37361	2.25549	1.17427	1.39494	2.40964	1.7753	1.39971	1.08673	1.74052			1.58767	1.45178	1.60112	1.85996	1.40899
C1orf54	1.33189	1.65432	2.29927	2.65705	2.77842	1.39553	1.16658	2.00245	1.19997	0.969258	2.07422	1.15105	1.3942	3.1453	2.27286			1.76183	2.277	1.45633	1.39818	2.27079
C1orf56	2.33395	2.70754	2.7013	2.11939	2.82486	1.70716	2.0302	2.12562	2.307	3.07582	2.86773	2.39853	2.49284	2.36212	2.55801			2.58093	2.21714	2.15427	2.78069	2.47099
C1orf61	0.0075258	0.0463813	0	0.0453831	0.0461156	0.0582066	0.000568913	0.00417263	0.000927391	0.0046441	0.14616	0.0446607	0.00194411	0.0017284	0			0.017969	0.0499018	0.00188964	0.0651549	0.00122417
C1orf64	0	0	0	0	0	0	0	0	0	0	0	0	0	0	0			0	0	0	0	0
C1orf68	0	0	0	0	0	0	0	0	0	0	0	0	0	0	0			0	0	0	0	0
C1orf74	1.80376	1.78075	1.44313	1.26391	1.6474	1.43075	2.18675	1.44852	1.74281	1.18606	1.44841	1.19149	1.25327	1.44748	2.13034			1.67588	1.44735	1.79269	1.27532	1.61036
C1orf86	43.272	40.2348	39.4534	40.5113	45.4474	43.7533	46.8331	42.625	37.5437	39.7332	43.3108	41.3058	46.858	38.7216	36.8798			40.9867	43.2373	42.3339	41.4499	40.8198
C1orf87	0.0195759	0.0192693	0	0.0178699	0.00032685	0.0478612	0.000136186	0	0.000332997	0.0193212	0	0	0	0.0179835	0			0.0129484	0.0220193	0.000156394	0.0064404	0.0059945
C1orf94	0.0550347	0.0534782	0.199749	0.0759445	0.0788952	0.0710327	0.0532652	0.0651719	0.0696272	0.107401	0.0319227	0.033256	0.0941783	0.0757997	0.0754347			0.102754	0.0752908	0.0626881	0.0575266	0.0818042
C1orf95	0	0	0	0.000422069	0.00362455	0.0045593	0	0	0.00344385	0	0	0.00352883	0	0	0.119745			0	0.00286864	0.00114795	0.00117628	0.039915
C1QA	0	0	0	0	0	0	0	0	0	0	0	0	0	0	0			0	0	0	0	0
C1QB	0	0	0	0	0	0	0	0	0	0	0	0	0	0	0			0	0	0	0	0
C1QBP	130.605	128.614	134.535	104.787	115.927	119.229	126.767	158.98	134.651	135.256	141.339	142.263	146.633	139.986	152.628			131.251	113.314	140.133	139.619	146.416
C1QC	0	0	0	0.0059918	0	0	0	0	0	0	0	0	0	0	0			0	0.00199727	0	0	0
C1QL1	0.667703	1.04557	0.636935	0.900681	1.02943	1.49795	1.15537	1.52307	0.835889	0.592575	0.468757	0.922229	0.876477	0.638195	0.926924			0.783403	1.14269	1.17144	0.661187	0.813865
C1QL2	0.0426906	0	0	0	0	0.0185533	0.0516351	0	0	0	0.017748	0	0	0	0			0.0142302	0.00618443	0.0172117	0.005916	0
C1QL3	0.233619	0.23281	0.228885	0.181429	0.178251	0.13403	0.160262	0.228129	0.302055	0.192793	0.17458	0.218791	0.300249	0.253054	0.343645			0.231771	0.16457	0.230149	0.195388	0.298983
C1QL4	0.0171912	0.0145031	0	0.0154844	0	0	0.292447	0.436023	0.208647	0	0	0	0.0116852	0.0416474	0.0457712			0.0105648	0.00516147	0.312372	0	0.0330346
C1QTNF1	21.4494	19.0803	19.1595	22.7853	24.4461	27.3443	22.0575	17.4573	20.6983	29.8099	29.4674	31.0007	23.5354	21.7819	21.8219			19.8964	24.8586	20.071	30.0927	22.3797
C1QTNF2	0.5018	0.173406	0.0733481	0.303377	0.0821138	0.124791	0.215149	0.316706	0.108852	0.22254	0.18556	0.0974617	0.296921	0.280233	0.128097			0.249518	0.170094	0.213569	0.168521	0.235084
C1QTNF3	0.125271	0.146632	0.174428	0.192721	0.355993	0.0666192	0.0799272	0.229119	0.206442	0.215044	0.139601	0.0960563	0.369254	0.0843389	0.145451			0.148777	0.205111	0.171829	0.150234	0.199681
C1QTNF4	0.105688	0.269487	0	0.0985814	0.137065	0.128794	0.0856897	0.143244	0.0348443	0	0.0406924	0.0291475	0.0473795	0.0328513	0.011141			0.125058	0.12148	0.087926	0.02328	0.0304573
C1QTNF5	0.851285	1.23077	1.18197	1.35465	1.1533	1.12483	1.05931	1.45661	0.719573	1.65748	1.10458	1.48957	0.854558	1.02789	1.24818			1.08801	1.21093	1.0785	1.41721	1.04354
C1QTNF6	1.57486	1.63616	1.51977	1.63499	1.66856	1.54505	1.33922	1.87997	1.76145	1.56424	1.33834	1.17065	1.72108	1.52094	1.45389			1.57693	1.6162	1.66021	1.35774	1.5653
C1QTNF7	0.0135649	0.019726	0.0019304	0.0185751	0.0130914	0.0896471	0.000960378	0.0483759	0.0133913	0.0425388	0	0.0398046	0.0556156	0.0762014	0.1019			0.0117404	0.0404379	0.0209092	0.0274478	0.0779057
C1QTNF8	0	0	0	0	0	0	0.0463961	0.0282354	0.0173093	0	0	0	0	0	0			0	0	0.0306469	0	0
[truncated: 18,132 more rows]
